# Supplementary material
Source: PubMed Central journal article supplement (PMC3563094)
Supplement: NIHMS432651-supplement-ESI_1.pdf [file NIHMS432651-supplement-ESI_1.pdf]

Supplementary Table 1 Complete List of Genes Meeting One-Way ANOVA, p-value 0.0005

| Transcript ID | p-value  | Arsenic  |      | Chromium |      | Nickel   |      | Vanadium |      | Gene Symbol     |
|---------------|----------|----------|------|----------|------|----------|------|----------|------|-----------------|
|               |          | $\Delta$ | Reg  | $\Delta$ | Reg  | $\Delta$ | Reg  | $\Delta$ | Reg  |                 |
| 7959786a      | 8.70E-07 | 1.23     | down | 1.23     | up   | 1.11     | down | 1.34     | down | AACS            |
| 7989953a      | 3.92E-07 | 1.08     | up   | 1.31     | down | 1.23     | up   | 1.42     | down | AAGAB           |
| 8058914a      | 2.95E-09 | 1.35     | up   | 1.39     | up   | 1.20     | up   | 1.27     | down | AAMP            |
| 8015741a      | 4.57E-05 | 1.09     | down | 1.42     | up   | 1.07     | down | 1.59     | down | AARSD1          |
| 7943552a      | 7.18E-07 | 1.05     | down | 1.40     | up   | 1.16     | down | 1.18     | down | AASDHPPT;KBTBD3 |
| 8006690a      | 5.78E-09 | 1.17     | up   | 1.47     | up   | 1.30     | up   | 1.79     | down | AATF            |
| 8132743a      | 1.47E-05 | 1.01     | up   | 1.03     | up   | 1.01     | up   | 1.14     | up   | ABCA13          |
| 8018038a      | 7.13E-08 | 1.40     | up   | 1.03     | down | 2.32     | up   | 1.83     | down | ABCA5           |
| 8137310a      | 5.18E-05 | 1.05     | down | 1.30     | up   | 1.02     | up   | 1.05     | down | ABCB8           |
| 7967337a      | 4.99E-05 | 1.23     | up   | 1.16     | up   | 1.35     | up   | 1.15     | up   | ABCB9           |
| 7929779a      | 1.50E-05 | 1.30     | up   | 1.10     | down | 1.13     | up   | 1.40     | up   | ABCC2           |
| 8008454a      | 1.12E-05 | 1.48     | up   | 1.81     | down | 2.37     | up   | 1.47     | up   | ABCC3           |
| 8092418a      | 2.99E-05 | 1.03     | up   | 1.72     | up   | 1.13     | up   | 1.29     | down | ABCC5           |
| 7961710a      | 1.19E-05 | 1.04     | down | 1.25     | up   | 1.03     | down | 1.27     | up   | ABCC9           |
| 8170704a      | 6.00E-06 | 1.14     | up   | 1.72     | down | 1.10     | up   | 1.68     | up   | ABCD1           |
| 8179112a      | 6.84E-08 | 1.39     | up   | 1.20     | up   | 1.32     | up   | 1.02     | down | ABCF1           |
| 8143905a      | 9.53E-06 | 1.12     | down | 1.31     | up   | 1.14     | down | 1.24     | down | ABCF2           |
| 8084360a      | 1.59E-05 | 1.13     | up   | 1.37     | up   | 1.08     | up   | 1.26     | down | ABCF3           |
| 8101675a      | 4.56E-08 | 1.03     | up   | 1.23     | up   | 1.03     | down | 3.20     | up   | ABCG2           |
| 8065469a      | 1.98E-08 | 1.95     | down | 1.05     | up   | 1.94     | down | 1.23     | up   | ABHD12          |
| 8087825a      | 1.68E-06 | 1.18     | up   | 1.31     | down | 1.09     | up   | 1.22     | up   | ABHD14B         |
| 8013919a      | 4.81E-07 | 1.18     | up   | 1.10     | up   | 1.18     | up   | 1.30     | down | ABHD15          |
| 7985809a      | 2.68E-06 | 1.01     | down | 1.54     | down | 1.03     | down | 1.06     | up   | ABHD2           |
| 8022488a      | 2.38E-05 | 1.14     | up   | 1.04     | up   | 1.41     | up   | 1.28     | down | ABHD3           |
| 7973306a      | 7.90E-05 | 1.07     | down | 1.56     | down | 1.18     | down | 1.45     | up   | ABHD4           |
| 8047659a      | 6.19E-07 | 1.25     | up   | 1.10     | down | 1.32     | up   | 1.06     | up   | ABI2            |
| 8089145a      | 1.12E-09 | 1.77     | up   | 6.03     | down | 5.09     | up   | 5.22     | up   | ABI3BP          |
| 7922610a      | 9.39E-08 | 1.15     | down | 1.06     | down | 1.44     | down | 1.34     | up   | ABL2            |
| 7936463a      | 1.35E-05 | 1.33     | down | 2.34     | down | 1.65     | down | 1.52     | up   | ABLIM1          |
| 8109093a      | 2.37E-07 | 1.05     | down | 1.40     | down | 1.26     | up   | 2.52     | up   | ABLIM3          |
| 8010983a      | 2.33E-07 | 1.21     | up   | 1.33     | down | 1.35     | up   | 1.03     | down | ABR             |
| 8117522a      | 3.88E-06 | 1.27     | up   | 1.05     | up   | 1.26     | up   | 1.00     | down | ABT1            |
| 8014487a      | 2.91E-06 | 1.19     | up   | 1.34     | up   | 1.33     | up   | 1.50     | down | ACACA           |
| 7959220a      | 1.82E-05 | 1.11     | up   | 1.17     | up   | 1.33     | up   | 1.10     | down | ACADS           |
| 7931168a      | 1.17E-05 | 1.06     | down | 1.62     | up   | 1.20     | up   | 1.13     | down | ACADSB          |
| 8092933a      | 2.44E-05 | 1.09     | up   | 1.12     | up   | 1.27     | up   | 1.42     | down | ACAP2           |
| 7943605a      | 2.05E-05 | 1.30     | down | 1.24     | up   | 1.30     | down | 1.05     | down | ACAT1           |
| 8007730a      | 6.40E-06 | 1.10     | up   | 1.23     | up   | 1.13     | up   | 1.40     | down | ACBD4           |
| 8015460a      | 6.99E-06 | 1.09     | down | 1.48     | up   | 1.20     | down | 1.41     | down | ACLY            |
| 7975598a      | 9.20E-06 | 1.51     | up   | 1.23     | down | 1.02     | down | 1.16     | up   | ACOT1           |
| 8117219a      | 2.45E-05 | 1.38     | up   | 1.11     | down | 1.53     | up   | 1.01     | up   | ACOT13          |
| 7975602a      | 1.16E-06 | 1.64     | up   | 1.71     | down | 1.20     | up   | 1.19     | up   | ACOT2           |
| 7975607a      | 6.94E-06 | 1.28     | down | 1.11     | down | 1.90     | down | 1.15     | up   | ACOT4           |
| 8044353a      | 6.50E-07 | 1.07     | down | 1.25     | up   | 1.08     | down | 1.09     | up   | ACOXL           |
| 8039961a      | 3.99E-07 | 1.15     | up   | 1.30     | down | 1.29     | up   | 1.23     | up   | ACP1            |
| 8083075a      | 3.08E-06 | 1.43     | down | 1.16     | up   | 1.66     | down | 2.66     | up   | ACPL2           |
| 7997863a      | 3.07E-06 | 1.16     | up   | 1.31     | up   | 1.34     | up   | 1.29     | down | ACSF3           |
| 8174474a      | 1.45E-05 | 1.09     | up   | 1.47     | down | 1.06     | down | 1.03     | down | ACSL4           |
| 7957386a      | 1.15E-05 | 2.84     | up   | 2.03     | up   | 1.10     | up   | 1.08     | up   | ACSS3           |
| 8019183a      | 2.41E-05 | 1.01     | down | 1.05     | down | 1.05     | down | 1.08     | up   | ACTG1           |
| 8028524a      | 2.65E-05 | 1.08     | down | 1.01     | down | 1.15     | down | 1.08     | up   | ACTN4           |
| 7974587a      | 6.91E-06 | 1.03     | down | 1.45     | down | 1.08     | down | 1.32     | up   | ACTR10          |

| Transcript ID | Arsenic  |      |      | Chromium |      | Nickel |      | Vanadium |      | Gene Symbol           |
|---------------|----------|------|------|----------|------|--------|------|----------|------|-----------------------|
|               | p-value  | Δ    | Reg  | Δ        | Reg  | Δ      | Reg  | Δ        | Reg  |                       |
| 8056005a      | 7.16E-11 | 1.87 | up   | 1.31     | down | 1.54   | up   | 1.41     | up   | ACVR1                 |
| 8045587a      | 3.13E-05 | 2.84 | up   | 1.75     | up   | 1.33   | up   | 1.44     | up   | ACVR2A                |
| 8066431a      | 1.33E-09 | 1.06 | up   | 1.82     | down | 1.51   | up   | 2.07     | up   | ADA                   |
| 7989224a      | 8.41E-05 | 1.01 | down | 1.29     | down | 1.12   | down | 1.27     | down | ADAM10                |
| 8007675a      | 3.85E-05 | 1.10 | up   | 1.01     | up   | 1.24   | up   | 1.22     | down | ADAM11                |
| 7936968a      | 2.34E-07 | 2.10 | down | 2.92     | down | 2.65   | down | 4.14     | up   | ADAM12                |
| 8050190a      | 2.53E-06 | 1.27 | up   | 1.21     | down | 1.16   | up   | 1.54     | up   | ADAM17                |
| 8150395a      | 2.00E-05 | 1.09 | up   | 1.18     | down | 1.06   | up   | 1.04     | down | ADAM2                 |
| 8146024a      | 4.37E-08 | 1.06 | down | 2.04     | down | 2.06   | down | 1.85     | up   | ADAM32                |
| 8146000a      | 2.68E-07 | 1.22 | down | 1.48     | down | 1.23   | down | 1.46     | up   | ADAM9                 |
| 8069676a      | 6.19E-07 | 1.70 | up   | 28.80    | up   | 1.70   | down | 1.65     | down | ADAMTS1               |
| 8111387a      | 5.50E-05 | 1.13 | down | 1.34     | down | 2.64   | down | 1.81     | up   | ADAMTS12              |
| 8104321a      | 2.82E-07 | 1.42 | down | 1.40     | up   | 1.27   | down | 2.35     | up   | ADAMTS16              |
| 8100870a      | 1.93E-07 | 1.46 | down | 2.12     | down | 5.07   | down | 1.09     | down | ADAMTS3               |
| 8069689a      | 2.81E-05 | 1.71 | down | 6.98     | up   | 2.20   | down | 1.13     | down | ADAMTS5               |
| 8154491a      | 3.96E-07 | 1.49 | down | 1.11     | up   | 5.12   | down | 2.07     | up   | ADAMTSL1              |
| 8154512a      | 4.40E-09 | 1.33 | down | 1.05     | down | 2.65   | down | 1.59     | up   | ADAMTSL1              |
| 7985522a      | 2.13E-07 | 1.89 | down | 3.96     | down | 2.18   | down | 1.52     | up   | ADAMTSL3              |
| 8006214a      | 4.90E-08 | 1.05 | up   | 1.16     | up   | 1.27   | up   | 1.32     | down | ADAP2                 |
| 8069178a      | 1.63E-08 | 2.12 | up   | 2.38     | up   | 1.34   | up   | 2.49     | down | ADARB1                |
| 8002904a      | 1.60E-06 | 1.02 | up   | 1.33     | down | 1.02   | down | 1.45     | up   | ADAT1                 |
| 8136591a      | 8.08E-06 | 1.24 | up   | 1.13     | up   | 1.89   | up   | 1.25     | down | ADCK2                 |
| 7995492a      | 3.60E-06 | 1.06 | up   | 1.22     | down | 1.02   | up   | 1.76     | up   | ADCY7                 |
| 7999079a      | 1.23E-08 | 1.27 | down | 1.45     | down | 1.37   | down | 1.50     | up   | ADCY9                 |
| 7930380a      | 2.48E-05 | 1.20 | down | 1.53     | down | 1.33   | down | 1.38     | up   | ADD3                  |
| 8101844a      | 1.61E-08 | 1.19 | up   | 1.50     | down | 1.15   | up   | 1.18     | up   | ADH5                  |
| 8050071a      | 5.82E-07 | 1.23 | up   | 1.72     | down | 1.04   | up   | 1.33     | up   | ADI1                  |
| 7938390a      | 6.66E-06 | 1.05 | down | 2.88     | up   | 1.67   | down | 1.31     | down | ADM                   |
| 8071899a      | 4.36E-06 | 1.39 | up   | 1.16     | up   | 1.59   | up   | 1.31     | down | ADORA2A;CYTSA         |
| 7900087a      | 5.27E-05 | 1.24 | up   | 1.26     | up   | 1.01   | down | 1.16     | down | ADPRHL2               |
| 8063893a      | 7.74E-05 | 1.23 | up   | 1.30     | up   | 1.28   | up   | 1.01     | down | ADRM1                 |
| 7977273a      | 3.77E-05 | 1.46 | up   | 1.03     | down | 1.40   | up   | 1.13     | up   | ADSSL1                |
| 8099259a      | 8.38E-06 | 1.08 | down | 1.57     | down | 1.23   | down | 1.52     | up   | AFAP1                 |
| 7936439a      | 7.81E-07 | 2.19 | down | 1.30     | up   | 2.26   | down | 1.10     | up   | AFAP1L2               |
| 7998083a      | 9.80E-08 | 1.17 | up   | 1.22     | up   | 1.36   | up   | 1.13     | down | AFG3L1                |
| 8103834a      | 2.10E-05 | 1.48 | up   | 1.08     | up   | 1.09   | up   | 1.22     | down | AGA                   |
| 8137381a      | 1.65E-06 | 1.17 | down | 1.18     | up   | 1.14   | down | 1.04     | down | AGAP3                 |
| 7933574a      | 1.52E-06 | 1.40 | down | 1.22     | up   | 1.38   | down | 1.05     | down | AGAP4-10;LOC100294038 |
| 7947947a      | 2.67E-07 | 1.39 | up   | 1.18     | down | 1.26   | up   | 1.13     | down | AGBL2                 |
| 8040774a      | 2.24E-07 | 1.30 | up   | 1.02     | up   | 1.65   | up   | 1.01     | down | AGBL5                 |
| 8048847a      | 2.07E-06 | 1.16 | up   | 1.06     | up   | 1.17   | up   | 1.07     | down | AGFG1                 |
| 8106429a      | 7.32E-05 | 1.01 | up   | 1.13     | down | 1.04   | up   | 1.48     | up   | AGGF1                 |
| 7912659a      | 1.15E-07 | 1.31 | up   | 1.22     | up   | 1.75   | down | 2.18     | down | AGMAT                 |
| 8179958a      | 7.15E-07 | 1.36 | up   | 1.01     | down | 1.46   | up   | 1.20     | up   | AGPAT1                |
| 8068952a      | 1.15E-06 | 1.06 | down | 1.31     | up   | 1.03   | up   | 1.30     | down | AGPAT3                |
| 8130628a      | 2.73E-08 | 1.16 | down | 1.62     | down | 1.01   | up   | 1.44     | up   | AGPAT4                |
| 7985192a      | 1.24E-06 | 1.17 | up   | 1.25     | down | 1.32   | up   | 1.55     | down | AGPHD1                |
| 7981514a      | 9.35E-08 | 1.39 | up   | 2.75     | down | 1.52   | up   | 2.19     | up   | AHNAK2                |
| 8131614a      | 5.80E-07 | 1.19 | down | 1.11     | down | 1.45   | down | 1.50     | up   | AHR                   |
| 8104180a      | 6.04E-05 | 1.22 | up   | 1.12     | up   | 1.32   | up   | 1.33     | up   | AHRR;PDCD6            |
| 8175052a      | 1.15E-05 | 1.17 | up   | 1.18     | down | 1.07   | down | 1.19     | down | AIFM1                 |
| 8121277a      | 1.08E-07 | 1.19 | up   | 5.50     | down | 1.55   | up   | 2.72     | up   | AIM1                  |
| 7914617a      | 2.16E-05 | 1.05 | down | 1.32     | up   | 1.11   | down | 1.06     | down | AK2                   |

| Transcript ID | Arsenic  |          |      | Chromium |      | Nickel   |      | Vanadium |      | Gene Symbol          |
|---------------|----------|----------|------|----------|------|----------|------|----------|------|----------------------|
|               | p-value  | $\Delta$ | Reg  | $\Delta$ | Reg  | $\Delta$ | Reg  | $\Delta$ | Reg  |                      |
| 7916590a      | 1.53E-05 | 1.03     | up   | 1.17     | up   | 1.08     | down | 1.07     | down | AK2                  |
| 8159945a      | 3.78E-07 | 1.13     | down | 1.02     | down | 1.44     | down | 1.22     | up   | AK3                  |
| 7902038a      | 1.82E-07 | 1.06     | down | 1.47     | up   | 1.37     | down | 1.22     | up   | AK3L1                |
| 7962183a      | 1.63E-07 | 1.22     | down | 2.52     | up   | 2.06     | down | 1.25     | up   | AK3L1                |
| 7902452a      | 4.70E-05 | 2.10     | up   | 4.94     | up   | 2.26     | up   | 1.71     | down | AK5                  |
| 7985695a      | 3.66E-07 | 1.03     | up   | 1.68     | down | 1.17     | up   | 1.15     | up   | AKAP13               |
| 8122045a      | 9.93E-05 | 1.03     | down | 1.38     | down | 1.21     | up   | 1.01     | up   | AKAP7                |
| 8035007a      | 8.99E-05 | 1.12     | down | 1.25     | up   | 1.03     | down | 1.09     | down | AKAP8                |
| 7900216a      | 6.74E-06 | 1.20     | up   | 1.16     | up   | 1.00     | up   | 1.05     | down | AKIRIN1              |
| 8128034a      | 8.02E-07 | 1.33     | up   | 1.04     | up   | 1.36     | up   | 1.01     | down | AKIRIN2              |
| 7981494a      | 3.08E-06 | 1.35     | up   | 1.07     | down | 1.26     | up   | 1.08     | up   | AKT1                 |
| 7925531a      | 2.24E-07 | 1.15     | down | 1.55     | down | 1.22     | down | 1.19     | up   | AKT3                 |
| 8001410a      | 4.64E-06 | 1.11     | down | 1.80     | down | 1.08     | up   | 1.43     | up   | AKTIP                |
| 8081431a      | 2.40E-07 | 1.24     | down | 1.49     | down | 1.34     | down | 1.47     | up   | ALCAM                |
| 7935230a      | 1.62E-09 | 1.11     | down | 1.49     | up   | 1.32     | down | 1.29     | down | ALDH18A1             |
| 7986446a      | 2.32E-07 | 1.86     | down | 4.02     | down | 1.11     | down | 2.76     | up   | ALDH1A3              |
| 7958784a      | 7.06E-06 | 1.01     | up   | 1.35     | up   | 1.07     | up   | 2.99     | down | ALDH2                |
| 8005638a      | 1.90E-06 | 1.31     | up   | 1.00     | down | 1.56     | up   | 1.31     | down | ALDH3A2              |
| 8117207a      | 9.27E-06 | 1.27     | up   | 1.37     | up   | 2.03     | up   | 1.86     | down | ALDH5A1              |
| 7993071a      | 5.06E-05 | 1.03     | up   | 1.03     | down | 1.47     | down | 1.13     | up   | ALG1;FAM86A          |
| 7969228a      | 3.62E-05 | 1.05     | down | 1.43     | down | 1.48     | down | 1.16     | up   | ALG11;UTP14C         |
| 8169419a      | 7.11E-05 | 1.00     | up   | 1.42     | down | 1.49     | down | 1.28     | down | ALG13                |
| 8162827a      | 2.70E-07 | 1.03     | down | 1.39     | up   | 1.04     | up   | 1.65     | down | ALG2                 |
| 7951633a      | 1.91E-07 | 1.16     | down | 1.23     | up   | 1.17     | down | 1.20     | down | ALG9                 |
| 7966183a      | 7.35E-06 | 1.01     | up   | 1.12     | down | 1.11     | up   | 1.75     | up   | ALKBH2               |
| 8141757a      | 9.57E-05 | 1.18     | up   | 1.22     | up   | 1.05     | up   | 1.13     | down | ALKBH4               |
| 8005399a      | 1.10E-05 | 1.28     | up   | 1.37     | up   | 1.04     | up   | 1.05     | down | ALKBH5               |
| 7968344a      | 1.36E-07 | 1.04     | up   | 2.22     | down | 1.07     | down | 1.50     | up   | ALOX5AP              |
| 8058203a      | 7.78E-05 | 1.13     | up   | 1.03     | up   | 1.35     | down | 1.16     | up   | ALS2CR12             |
| 8111430a      | 2.84E-06 | 1.49     | up   | 1.15     | up   | 1.29     | up   | 1.06     | down | AMACR                |
| 7947652a      | 3.78E-05 | 1.16     | up   | 1.25     | up   | 1.04     | up   | 1.08     | down | AMBRA1               |
| 8001477a      | 2.48E-05 | 1.06     | up   | 1.16     | down | 1.12     | up   | 1.40     | up   | AMFR                 |
| 7962579a      | 3.12E-05 | 1.37     | down | 3.77     | down | 1.16     | up   | 1.79     | up   | AMIGO2               |
| 8055096a      | 4.74E-05 | 1.13     | up   | 1.19     | down | 1.17     | up   | 1.00     | down | AMMECR1L             |
| 7943263a      | 1.23E-05 | 1.20     | down | 1.27     | up   | 1.19     | down | 1.22     | up   | AMOTL1               |
| 7938396a      | 7.46E-06 | 1.15     | down | 1.30     | up   | 1.26     | down | 1.44     | up   | AMPD3                |
| 8009432a      | 3.50E-07 | 1.23     | up   | 1.05     | down | 1.28     | up   | 1.08     | up   | AMZ2                 |
| 8054437a      | 8.12E-06 | 1.24     | up   | 1.51     | up   | 1.14     | up   | 1.49     | down | ANAPC1               |
| 8054614a      | 3.59E-08 | 1.22     | up   | 1.34     | up   | 1.13     | up   | 1.24     | down | ANAPC1;LOC285074     |
| 8010686a      | 6.12E-07 | 1.20     | up   | 1.22     | down | 1.26     | up   | 1.08     | up   | ANAPC11              |
| 7973084a      | 1.90E-05 | 1.22     | up   | 1.22     | up   | 1.35     | up   | 1.29     | down | ANG;RNASE4           |
| 8164200a      | 4.06E-08 | 1.02     | down | 1.30     | up   | 1.15     | down | 2.91     | down | ANGPTL2              |
| 8011599a      | 4.17E-06 | 1.30     | up   | 1.12     | up   | 1.17     | up   | 1.39     | down | ANKFY1               |
| 8112596a      | 2.66E-06 | 1.08     | down | 1.64     | down | 1.13     | up   | 1.90     | up   | ANKRA2               |
| 7934979a      | 7.19E-05 | 1.75     | down | 1.26     | up   | 6.63     | down | 1.09     | up   | ANKRD1               |
| 8003448a      | 3.66E-06 | 1.21     | up   | 1.31     | up   | 1.34     | up   | 1.24     | down | ANKRD11              |
| 8161388a      | 1.70E-06 | 1.08     | up   | 1.01     | up   | 2.12     | up   | 1.61     | down | ANKRD20A1-5;ANKRD20B |
| 8053744a      | 4.21E-05 | 1.09     | down | 1.05     | up   | 2.38     | up   | 1.35     | down | ANKRD20B;ANKRD20A1-4 |
| 8161384a      | 2.61E-06 | 1.12     | down | 1.17     | up   | 1.71     | up   | 2.31     | down | ANKRD20B;CCDC29      |
| 8155591a      | 6.64E-06 | 1.19     | down | 1.01     | up   | 2.93     | up   | 2.14     | down | ANKRD20B             |
| 8053984a      | 8.41E-05 | 1.03     | up   | 1.34     | up   | 1.07     | up   | 1.06     | down | ANKRD23;ANKRD39      |
| 8053998a      | 1.29E-09 | 1.42     | up   | 1.15     | up   | 1.39     | up   | 1.28     | down | ANKRD39              |
| 8102720a      | 1.45E-05 | 1.06     | up   | 1.82     | down | 1.12     | up   | 1.19     | up   | ANKRD50              |

| Transcript ID | p-value  | Arsenic |      | Chromium |      | Nickel |      | Vanadium |      | Gene Symbol |
|---------------|----------|---------|------|----------|------|--------|------|----------|------|-------------|
|               |          | Δ       | Reg  | Δ        | Reg  | Δ      | Reg  | Δ        | Reg  |             |
| 8121095a      | 9.23E-08 | 1.45    | up   | 1.18     | up   | 1.84   | up   | 1.75     | down | ANKRD6      |
| 8135697a      | 8.46E-05 | 1.00    | up   | 1.32     | up   | 1.27   | down | 1.00     | down | ANKRD7      |
| 8118863a      | 6.87E-06 | 1.24    | up   | 1.19     | up   | 1.31   | up   | 1.00     | down | ANKS1A      |
| 8086467a      | 4.91E-06 | 1.16    | down | 1.27     | down | 1.20   | down | 1.38     | up   | ANO10       |
| 7960438a      | 3.44E-10 | 3.84    | down | 1.24     | up   | 4.31   | down | 1.34     | up   | ANO2        |
| 7957861a      | 8.56E-10 | 1.07    | down | 1.84     | up   | 1.13   | down | 4.52     | down | ANO4        |
| 8156750a      | 1.73E-06 | 1.04    | down | 1.34     | up   | 1.04   | down | 1.37     | down | ANP32B      |
| 7991335a      | 7.87E-05 | 1.41    | up   | 2.86     | down | 1.27   | up   | 1.71     | up   | ANPEP       |
| 8042439a      | 1.33E-05 | 1.15    | up   | 1.30     | down | 1.53   | up   | 1.13     | up   | ANTXR1      |
| 8101260a      | 2.66E-05 | 1.06    | down | 1.04     | down | 2.13   | down | 2.53     | up   | ANTXR2      |
| 7933237a      | 6.61E-09 | 1.14    | up   | 1.22     | up   | 1.28   | up   | 2.93     | down | ANUBL1      |
| 8154836a      | 1.62E-05 | 1.12    | down | 1.14     | down | 1.11   | down | 1.05     | up   | ANXA2P2     |
| 8095986a      | 2.42E-07 | 1.79    | down | 3.52     | down | 1.65   | down | 1.37     | up   | ANXA3       |
| 8042468a      | 8.47E-05 | 1.30    | up   | 1.46     | down | 1.36   | up   | 1.34     | up   | ANXA4       |
| 8102619a      | 3.68E-08 | 1.07    | down | 1.27     | down | 1.07   | down | 1.46     | up   | ANXA5       |
| 8117081a      | 9.84E-05 | 1.22    | up   | 1.01     | down | 1.42   | up   | 1.09     | up   | AOF1        |
| 8047300a      | 7.65E-07 | 1.15    | down | 3.32     | down | 2.82   | down | 2.21     | up   | AOX1        |
| 8002592a      | 5.05E-05 | 1.02    | up   | 1.22     | down | 1.07   | up   | 1.30     | up   | AP1G1       |
| 8034084a      | 1.13E-06 | 1.59    | up   | 1.79     | up   | 1.07   | down | 1.45     | down | AP1M2       |
| 8112772a      | 1.34E-08 | 1.22    | down | 1.34     | down | 1.06   | down | 1.64     | up   | AP3B1       |
| 7934513a      | 1.36E-05 | 1.02    | down | 1.10     | up   | 1.03   | up   | 1.37     | down | AP3M1       |
| 8146159a      | 8.94E-05 | 1.16    | up   | 1.22     | down | 1.28   | up   | 1.10     | up   | AP3M2       |
| 8134712a      | 2.98E-06 | 1.18    | up   | 1.39     | down | 1.29   | up   | 1.27     | up   | AP4M1       |
| 7982187a      | 5.39E-09 | 1.42    | up   | 3.10     | up   | 2.98   | up   | 4.32     | down | APBA2       |
| 8099982a      | 3.58E-08 | 1.16    | down | 2.51     | down | 1.36   | down | 1.78     | up   | APBB2       |
| 8079772a      | 2.59E-05 | 1.34    | down | 1.23     | down | 1.28   | down | 1.34     | up   | APEH        |
| 8167854a      | 1.23E-08 | 1.44    | up   | 1.23     | down | 1.29   | up   | 1.15     | down | APEX2       |
| 7984124a      | 1.93E-06 | 1.19    | up   | 1.56     | down | 1.29   | down | 1.43     | up   | APH1B       |
| 7939424a      | 8.04E-08 | 1.06    | up   | 1.29     | up   | 1.05   | up   | 1.30     | down | API5        |
| 7947490a      | 1.09E-05 | 1.08    | up   | 1.34     | up   | 1.07   | up   | 1.30     | down | APIP;PDHX   |
| 8073088a      | 9.97E-10 | 2.25    | up   | 1.27     | down | 2.61   | up   | 1.81     | down | APOBEC3G    |
| 7964142a      | 2.69E-05 | 1.14    | down | 1.27     | up   | 1.15   | down | 1.02     | up   | APOF        |
| 8072735a      | 6.10E-06 | 1.30    | up   | 1.19     | up   | 1.30   | up   | 3.01     | down | APOL1       |
| 8072710a      | 6.70E-06 | 1.50    | up   | 1.18     | down | 1.77   | up   | 1.89     | down | APOL6       |
| 8003401a      | 2.12E-07 | 1.36    | up   | 1.13     | up   | 1.45   | up   | 1.32     | down | APRT        |
| 8160602a      | 3.11E-05 | 1.33    | up   | 1.17     | up   | 1.17   | up   | 1.32     | down | APTX        |
| 8167998a      | 3.24E-07 | 2.03    | up   | 2.56     | down | 2.04   | up   | 1.41     | up   | AR          |
| 8167165a      | 6.02E-09 | 1.32    | up   | 1.17     | down | 1.23   | up   | 1.18     | down | ARAF        |
| 7944285a      | 8.57E-05 | 1.04    | up   | 1.29     | up   | 1.02   | down | 1.13     | down | ARCN1       |
| 8175924a      | 8.07E-05 | 1.04    | down | 1.39     | down | 1.09   | down | 1.12     | up   | ARD1A       |
| 7974249a      | 7.28E-05 | 1.23    | up   | 1.27     | down | 1.05   | up   | 1.31     | up   | ARF6        |
| 7947784a      | 1.99E-06 | 1.20    | up   | 1.41     | up   | 1.09   | up   | 1.24     | down | ARFGAP2     |
| 8076515a      | 5.27E-06 | 1.01    | up   | 1.04     | down | 1.23   | down | 1.26     | up   | ARFGAP3     |
| 8097813a      | 4.22E-05 | 1.04    | up   | 1.39     | down | 1.01   | down | 1.07     | down | ARFIP1      |
| 7946201a      | 3.22E-08 | 1.38    | up   | 1.66     | up   | 1.14   | up   | 1.11     | down | ARFIP2      |
| 7947681a      | 6.55E-06 | 1.37    | up   | 1.38     | up   | 1.30   | up   | 1.06     | down | ARHGAP1     |
| 8097717a      | 6.30E-07 | 1.21    | down | 1.56     | down | 1.16   | down | 1.38     | up   | ARHGAP10    |
| 7982358a      | 3.50E-05 | 1.11    | down | 1.29     | down | 1.04   | up   | 1.42     | down | ARHGAP11A   |
| 8129458a      | 2.05E-06 | 2.37    | up   | 1.15     | down | 2.49   | up   | 2.07     | up   | ARHGAP18    |
| 7935403a      | 1.48E-07 | 1.44    | down | 1.14     | down | 1.39   | down | 1.25     | down | ARHGAP19    |
| 7951565a      | 3.16E-05 | 1.27    | down | 1.46     | up   | 1.23   | down | 2.74     | down | ARHGAP20    |
| 8006779a      | 3.37E-05 | 1.18    | up   | 1.06     | down | 1.16   | up   | 1.67     | down | ARHGAP23    |
| 8096160a      | 1.01E-07 | 2.05    | up   | 2.07     | down | 1.15   | up   | 1.10     | up   | ARHGAP24    |

| Transcript ID | p-value  | Arsenic  |      | Chromium |      | Nickel   |      | Vanadium |      | Gene Symbol    |
|---------------|----------|----------|------|----------|------|----------|------|----------|------|----------------|
|               |          | $\Delta$ | Reg  | $\Delta$ | Reg  | $\Delta$ | Reg  | $\Delta$ | Reg  |                |
| 8042416a      | 4.10E-05 | 1.26     | up   | 1.04     | up   | 1.12     | up   | 1.03     | down | ARHGAP25       |
| 8016215a      | 4.99E-08 | 1.03     | up   | 1.22     | up   | 1.03     | up   | 1.24     | down | ARHGAP27       |
| 8019964a      | 1.42E-07 | 1.42     | up   | 2.34     | up   | 2.49     | up   | 9.09     | down | ARHGAP28       |
| 7973840a      | 2.80E-05 | 1.19     | down | 1.13     | down | 1.59     | down | 1.04     | down | ARHGAP5        |
| 8019765a      | 3.47E-05 | 1.16     | up   | 1.17     | down | 1.17     | up   | 1.05     | up   | ARHGDI         |
| 8029147a      | 1.20E-05 | 1.10     | up   | 1.25     | up   | 1.01     | down | 1.14     | down | ARHGEF1        |
| 8144281a      | 5.11E-05 | 1.21     | down | 1.42     | down | 1.08     | down | 1.04     | up   | ARHGEF10       |
| 8173217a      | 2.71E-05 | 1.19     | down | 1.70     | down | 1.30     | down | 1.04     | up   | ARHGEF9        |
| 8110158a      | 4.23E-10 | 1.59     | down | 1.30     | down | 2.89     | down | 1.21     | up   | ARL10          |
| 8112033a      | 6.28E-07 | 1.48     | down | 1.73     | down | 1.01     | down | 1.82     | up   | ARL15          |
| 8016300a      | 1.05E-05 | 1.12     | down | 1.27     | up   | 1.05     | down | 1.60     | down | ARL17P1;NBR2   |
| 7936041a      | 2.25E-07 | 1.16     | down | 1.28     | down | 1.19     | down | 1.28     | up   | ARL3           |
| 8080926a      | 4.13E-07 | 1.03     | down | 1.67     | down | 1.09     | down | 1.47     | up   | ARL6IP5        |
| 7923394a      | 7.54E-05 | 1.03     | down | 1.38     | down | 1.11     | down | 1.24     | up   | ARL8A          |
| 8121370a      | 4.14E-05 | 1.16     | up   | 1.04     | up   | 1.29     | up   | 1.10     | down | ARMC2          |
| 8049044a      | 8.92E-08 | 1.17     | up   | 1.35     | down | 1.44     | up   | 1.12     | up   | ARMC9          |
| 8168868a      | 5.10E-06 | 1.24     | up   | 1.22     | down | 1.50     | down | 1.13     | up   | ARMCX1         |
| 8168875a      | 2.01E-08 | 1.43     | up   | 1.70     | down | 1.04     | down | 1.09     | down | ARMCX3         |
| 8168958a      | 2.21E-06 | 1.14     | up   | 1.53     | down | 1.10     | down | 1.10     | down | ARMCX5         |
| 7985285a      | 1.04E-06 | 1.38     | up   | 1.18     | up   | 1.89     | up   | 1.64     | down | ARNT2          |
| 8048234a      | 8.99E-06 | 1.06     | up   | 1.12     | down | 1.08     | up   | 1.06     | up   | ARPC2          |
| 7922793a      | 3.34E-08 | 1.01     | up   | 1.29     | down | 1.13     | down | 1.28     | up   | ARPC5          |
| 8092002a      | 3.03E-05 | 1.21     | up   | 1.13     | up   | 1.05     | down | 1.37     | down | ARPM1          |
| 8026915a      | 2.16E-05 | 1.15     | up   | 1.07     | down | 1.36     | up   | 1.01     | up   | ARRDC2         |
| 8113073a      | 1.18E-07 | 1.13     | down | 3.96     | down | 1.30     | down | 3.05     | up   | ARRDC3         |
| 8112807a      | 4.18E-07 | 1.09     | down | 1.35     | down | 1.02     | up   | 1.88     | up   | ARSB           |
| 8171148a      | 1.63E-09 | 1.87     | up   | 1.68     | up   | 1.67     | up   | 2.04     | down | ARSD           |
| 8106962a      | 2.46E-08 | 1.03     | up   | 1.56     | down | 1.07     | up   | 2.17     | up   | ARSK           |
| 7930181a      | 9.37E-06 | 1.31     | up   | 1.37     | up   | 1.44     | up   | 2.51     | down | AS3MT;C10orf32 |
| 7952341a      | 9.32E-08 | 1.21     | up   | 2.40     | down | 1.49     | down | 6.46     | up   | ASAM           |
| 8040113a      | 1.23E-08 | 1.10     | up   | 1.52     | down | 1.05     | up   | 1.99     | up   | ASAP2          |
| 7986433a      | 1.58E-05 | 1.12     | up   | 1.01     | down | 1.07     | up   | 1.28     | down | ASB7           |
| 8121734a      | 4.03E-05 | 1.11     | down | 1.52     | down | 1.23     | down | 1.19     | up   | ASF1A          |
| 8145894a      | 1.18E-05 | 1.10     | up   | 1.32     | down | 1.19     | up   | 1.12     | up   | ASH2L          |
| 8177011a      | 4.49E-06 | 1.44     | up   | 1.06     | up   | 1.79     | up   | 1.02     | down | ASMTL          |
| 8046997a      | 9.88E-09 | 1.20     | up   | 1.16     | up   | 1.22     | up   | 1.37     | down | ASNSD1         |
| 7994675a      | 3.05E-07 | 1.50     | up   | 1.01     | up   | 1.10     | up   | 1.27     | down | ASPHD1         |
| 8010702a      | 3.31E-05 | 1.14     | up   | 1.13     | down | 1.32     | up   | 1.05     | up   | ASPSCR1        |
| 7940643a      | 7.98E-06 | 1.10     | down | 1.63     | up   | 1.07     | up   | 1.89     | down | ASRGL1         |
| 8158671a      | 6.17E-07 | 1.30     | up   | 1.20     | up   | 1.62     | up   | 2.31     | down | ASS1           |
| 8152668a      | 1.20E-05 | 1.05     | down | 1.23     | up   | 1.20     | up   | 1.32     | down | ATAD2          |
| 7896961a      | 5.48E-07 | 1.10     | up   | 1.31     | up   | 1.06     | down | 1.20     | down | ATAD3B;ATAD3A  |
| 8006187a      | 1.41E-05 | 1.01     | up   | 1.26     | up   | 1.12     | up   | 1.51     | down | ATAD5          |
| 8056909a      | 9.02E-09 | 1.32     | up   | 1.00     | up   | 1.43     | up   | 1.26     | down | ATF2           |
| 8178727a      | 8.43E-06 | 1.02     | down | 1.41     | down | 1.25     | up   | 1.20     | up   | ATF6B;TNXB     |
| 7954104a      | 2.85E-05 | 1.02     | up   | 1.42     | up   | 1.19     | up   | 1.29     | down | ATF7IP         |
| 7993167a      | 1.51E-05 | 1.08     | down | 2.18     | up   | 1.07     | up   | 1.66     | down | ATF7IP2        |
| 8106709a      | 1.06E-08 | 1.12     | down | 2.03     | down | 1.00     | down | 2.34     | up   | ATG10          |
| 8077211a      | 5.04E-06 | 1.18     | up   | 1.26     | up   | 1.33     | up   | 1.31     | down | ATG4B          |
| 8025659a      | 2.05E-07 | 1.03     | down | 1.29     | up   | 1.13     | up   | 1.23     | down | ATG4D          |
| 8059139a      | 2.64E-05 | 1.12     | up   | 1.00     | up   | 1.45     | up   | 1.01     | up   | ATG9A          |
| 8048120a      | 7.48E-06 | 1.25     | up   | 1.34     | up   | 1.12     | up   | 1.04     | down | ATIC           |
| 7974270a      | 2.95E-09 | 1.33     | up   | 2.52     | down | 2.24     | down | 2.72     | up   | ATL1           |

| Transcript ID | p-value  | Arsenic  |      | Chromium |      | Nickel   |      | Vanadium |      | Gene Symbol           |
|---------------|----------|----------|------|----------|------|----------|------|----------|------|-----------------------|
|               |          | $\Delta$ | Reg  | $\Delta$ | Reg  | $\Delta$ | Reg  | $\Delta$ | Reg  |                       |
| 7948995a      | 5.12E-07 | 1.38     | down | 1.55     | down | 1.54     | down | 1.40     | up   | ATL3                  |
| 7948997a      | 4.31E-05 | 1.09     | down | 1.29     | down | 1.27     | down | 1.27     | up   | ATL3                  |
| 7943620a      | 9.80E-05 | 1.41     | down | 1.08     | up   | 1.30     | down | 1.16     | down | ATM;NPAT              |
| 7997396a      | 6.90E-10 | 1.50     | up   | 1.30     | up   | 1.49     | up   | 1.38     | down | ATMIN                 |
| 8156575a      | 2.40E-06 | 1.56     | up   | 1.37     | up   | 1.41     | up   | 1.03     | down | ATMIN                 |
| 8094911a      | 4.46E-08 | 1.25     | up   | 1.71     | down | 1.06     | down | 1.85     | up   | ATP10D                |
| 7970162a      | 6.83E-06 | 1.32     | down | 1.26     | up   | 1.69     | down | 1.06     | down | ATP11A                |
| 8175492a      | 8.42E-05 | 1.42     | up   | 1.28     | down | 1.10     | up   | 1.51     | down | ATP11C                |
| 7907160a      | 1.53E-07 | 1.05     | down | 1.63     | down | 1.06     | down | 1.19     | up   | ATP1B1                |
| 7908940a      | 1.47E-07 | 1.47     | down | 1.37     | down | 2.11     | down | 1.82     | up   | ATP2B4                |
| 8067288a      | 5.81E-05 | 1.03     | down | 1.19     | down | 1.04     | up   | 1.28     | up   | ATP5E                 |
| 8056930a      | 9.91E-05 | 1.14     | up   | 1.06     | down | 1.20     | up   | 1.08     | down | ATP5G3                |
| 8098762a      | 3.23E-05 | 1.02     | down | 1.61     | down | 1.11     | down | 1.12     | up   | ATP5I;MYL5            |
| 8069633a      | 5.57E-05 | 1.19     | up   | 1.13     | up   | 1.09     | up   | 1.27     | down | ATP5J                 |
| 7944216a      | 2.31E-05 | 1.09     | down | 1.17     | up   | 1.03     | up   | 1.23     | down | ATP5L                 |
| 8037037a      | 1.27E-09 | 1.11     | down | 1.31     | up   | 1.04     | down | 1.47     | down | ATP5SL                |
| 8170882a      | 5.17E-08 | 1.07     | down | 1.65     | down | 1.25     | down | 1.21     | up   | ATP6AP1               |
| 8166805a      | 2.12E-09 | 1.35     | down | 1.77     | down | 1.37     | down | 1.53     | up   | ATP6AP2               |
| 8143221a      | 3.75E-05 | 1.05     | down | 1.62     | up   | 1.19     | down | 1.90     | down | ATP6VOA4              |
| 8002041a      | 1.19E-06 | 1.20     | up   | 1.33     | down | 1.19     | up   | 1.39     | up   | ATP6VOD1;LOC100132855 |
| 8144931a      | 2.31E-07 | 1.16     | up   | 1.47     | down | 1.03     | up   | 1.16     | up   | ATP6V1B2              |
| 8147724a      | 9.81E-06 | 1.11     | up   | 1.25     | up   | 1.18     | up   | 1.35     | down | ATP6V1C1              |
| 8051989a      | 4.85E-08 | 1.29     | up   | 1.10     | down | 1.37     | up   | 1.06     | down | ATP6V1E2              |
| 8179762a      | 4.35E-06 | 1.53     | up   | 1.07     | up   | 1.10     | up   | 1.42     | up   | ATP6V1G2;BAT1         |
| 8168472a      | 2.03E-05 | 1.24     | up   | 1.58     | down | 1.03     | down | 1.08     | up   | ATP7A                 |
| 7905754a      | 7.52E-07 | 1.19     | down | 1.16     | down | 1.65     | down | 1.26     | up   | ATP8B2                |
| 7915870a      | 3.66E-07 | 1.04     | down | 1.20     | up   | 1.15     | down | 1.09     | down | ATPAF1;KIAA0494       |
| 8013179a      | 2.07E-05 | 1.22     | up   | 1.37     | up   | 1.12     | up   | 1.32     | down | ATPAF2                |
| 7987369a      | 2.60E-05 | 1.36     | down | 1.90     | down | 1.22     | down | 1.07     | up   | ATPBD4                |
| 8060627a      | 7.94E-07 | 2.11     | down | 1.07     | down | 2.02     | down | 1.05     | down | ATRN                  |
| 8173673a      | 1.60E-06 | 1.05     | up   | 2.01     | down | 1.10     | down | 1.36     | down | ATRX                  |
| 8176276a      | 2.92E-05 | 1.05     | up   | 1.92     | down | 1.07     | down | 1.45     | down | ATRX                  |
| 8124040a      | 4.29E-07 | 1.20     | up   | 1.78     | down | 1.74     | up   | 2.04     | up   | ATXN1                 |
| 8073799a      | 6.79E-07 | 1.04     | down | 1.23     | down | 1.08     | down | 1.20     | up   | ATXN10                |
| 7994386a      | 9.25E-07 | 1.31     | up   | 1.33     | up   | 1.21     | up   | 1.06     | down | ATXN2L                |
| 8015955a      | 5.22E-05 | 1.04     | up   | 1.15     | up   | 1.02     | down | 1.62     | down | ATXN7L3               |
| 8162264a      | 1.05E-07 | 1.03     | up   | 1.39     | up   | 1.17     | up   | 1.58     | down | AUH                   |
| 8012403a      | 3.87E-06 | 1.09     | up   | 1.30     | up   | 1.08     | up   | 1.24     | down | AURKB                 |
| 8133233a      | 9.22E-07 | 1.03     | up   | 1.04     | down | 2.33     | up   | 1.10     | up   | AUTS2                 |
| 7935521a      | 9.10E-06 | 1.02     | up   | 1.26     | up   | 1.41     | down | 1.20     | up   | AVPI1                 |
| 8029006a      | 1.65E-05 | 1.22     | down | 1.04     | up   | 1.17     | down | 1.01     | up   | AXL                   |
| 8152222a      | 3.41E-07 | 1.13     | up   | 1.02     | down | 1.33     | up   | 1.31     | down | AZIN1                 |
| 7983360a      | 1.06E-07 | 1.13     | down | 1.90     | down | 1.04     | down | 1.05     | down | B2M                   |
| 8091780a      | 2.83E-06 | 1.03     | up   | 1.78     | up   | 1.53     | down | 2.58     | down | B3GALNT1              |
| 7968370a      | 1.12E-07 | 1.06     | down | 1.80     | down | 1.06     | down | 1.37     | up   | B3GALTL               |
| 8042211a      | 2.08E-06 | 1.36     | up   | 1.18     | down | 1.25     | up   | 1.15     | down | B3GNT2                |
| 8001932a      | 1.11E-06 | 1.13     | up   | 1.28     | down | 1.81     | down | 1.79     | up   | B3GNT9;C16orf70       |
| 7964484a      | 3.25E-05 | 1.12     | down | 1.50     | down | 1.52     | up   | 1.20     | up   | B4GALNT1;SLC26A10     |
| 8160637a      | 8.21E-08 | 1.03     | up   | 1.27     | down | 1.04     | down | 1.38     | up   | B4GALT1               |
| 8066939a      | 3.27E-05 | 1.15     | up   | 1.13     | down | 1.25     | up   | 1.27     | up   | B4GALT5               |
| 8013331a      | 4.29E-05 | 1.27     | up   | 1.28     | up   | 1.27     | up   | 1.09     | down | B9D1                  |
| 7951910a      | 2.85E-06 | 1.26     | up   | 1.77     | down | 1.01     | up   | 2.30     | up   | BACE1                 |
| 8128247a      | 3.31E-05 | 1.23     | down | 1.13     | down | 1.44     | down | 1.63     | up   | BACH2                 |

| Transcript ID | p-value  | Arsenic |      | Chromium |      | Nickel |      | Vanadium |      | Gene Symbol       |
|---------------|----------|---------|------|----------|------|--------|------|----------|------|-------------------|
|               |          | Δ       | Reg  | Δ        | Reg  | Δ      | Reg  | Δ        | Reg  |                   |
| 7930921a      | 8.94E-05 | 1.25    | up   | 1.12     | down | 1.06   | up   | 1.13     | up   | BAG3              |
| 8069494a      | 8.76E-08 | 1.09    | down | 1.63     | up   | 1.03   | down | 2.23     | down | BAGE2;LOC441666   |
| 8141206a      | 3.20E-06 | 2.33    | up   | 2.13     | up   | 3.91   | up   | 1.16     | down | BAIAP2L1          |
| 8125766a      | 9.18E-06 | 1.30    | up   | 1.03     | down | 1.33   | up   | 1.06     | down | BAK1              |
| 8058695a      | 9.18E-05 | 1.13    | up   | 1.05     | up   | 1.31   | up   | 1.11     | down | BARD1             |
| 8178011a      | 3.66E-08 | 1.32    | up   | 1.05     | up   | 1.46   | up   | 1.02     | down | BAT2              |
| 8179782a      | 9.95E-06 | 1.26    | up   | 1.18     | up   | 1.43   | up   | 1.05     | down | BAT3              |
| 8124998a      | 1.09E-06 | 1.35    | up   | 1.14     | up   | 1.40   | up   | 1.11     | up   | BAT4              |
| 7924166a      | 2.27E-05 | 1.12    | up   | 1.45     | up   | 1.21   | down | 1.20     | down | BATF3             |
| 8056060a      | 1.08E-05 | 1.02    | up   | 1.96     | down | 1.16   | down | 1.09     | down | BAZ2B             |
| 8001507a      | 2.90E-07 | 1.10    | down | 1.60     | down | 1.21   | up   | 1.69     | up   | BBS2              |
| 8046147a      | 1.37E-05 | 1.84    | up   | 1.33     | up   | 1.72   | up   | 1.82     | down | BBS5;KBTBD10      |
| 8081465a      | 3.97E-06 | 1.27    | up   | 1.14     | up   | 1.42   | up   | 1.31     | down | BBX               |
| 8175835a      | 5.25E-08 | 1.13    | down | 1.48     | down | 1.21   | down | 1.39     | up   | BCAP31            |
| 8029065a      | 3.65E-05 | 1.20    | down | 1.28     | up   | 1.35   | down | 1.27     | down | BCKDHA            |
| 8044375a      | 1.29E-05 | 1.37    | up   | 1.48     | up   | 1.38   | up   | 1.55     | down | BCL2L11           |
| 7959354a      | 1.39E-07 | 1.19    | down | 1.41     | up   | 1.35   | down | 1.07     | down | BCL7A             |
| 8000948a      | 1.95E-06 | 1.38    | up   | 1.03     | down | 1.25   | up   | 1.00     | down | BCL7C             |
| 8172088a      | 2.59E-07 | 1.13    | up   | 1.86     | down | 1.01   | up   | 1.01     | up   | BCOR              |
| 8169882a      | 5.45E-07 | 1.24    | up   | 1.01     | down | 1.23   | down | 1.03     | up   | BCORL1            |
| 8048370a      | 3.52E-06 | 1.37    | up   | 1.04     | down | 1.41   | up   | 1.01     | up   | BCS1L             |
| 8093219a      | 1.09E-07 | 1.49    | down | 1.25     | up   | 2.38   | down | 1.49     | down | BDH1              |
| 7976567a      | 7.82E-06 | 1.53    | up   | 5.71     | down | 1.31   | down | 2.13     | up   | BDKRB1            |
| 8015715a      | 6.23E-06 | 1.21    | up   | 1.38     | up   | 1.04   | down | 1.71     | down | BECN1;CNTD1       |
| 7945349a      | 3.68E-08 | 1.71    | up   | 1.28     | up   | 1.25   | up   | 1.05     | up   | BET1L             |
| 8174201a      | 1.91E-07 | 1.21    | up   | 1.18     | down | 9.39   | down | 1.42     | up   | BEX1              |
| 8170648a      | 1.32E-07 | 1.05    | up   | 6.04     | down | 1.37   | up   | 1.28     | up   | BGN               |
| 8077441a      | 8.77E-07 | 1.12    | up   | 2.28     | down | 1.67   | up   | 1.13     | up   | BHLHE40           |
| 7961891a      | 3.49E-06 | 1.13    | down | 1.14     | down | 1.32   | down | 1.87     | up   | BHLHE41           |
| 8054945a      | 4.98E-08 | 1.63    | up   | 1.02     | down | 1.57   | up   | 1.22     | up   | BIN1              |
| 8149707a      | 8.10E-06 | 1.18    | up   | 1.17     | down | 1.30   | up   | 1.06     | up   | BIN3              |
| 7943413a      | 9.99E-08 | 1.25    | up   | 1.09     | down | 1.50   | up   | 2.90     | down | BIRC3             |
| 8036913a      | 5.44E-06 | 1.45    | up   | 1.05     | down | 1.24   | up   | 1.19     | up   | BLVRB             |
| 7926609a      | 1.14E-07 | 1.14    | down | 1.47     | down | 1.89   | down | 1.15     | up   | BMI1              |
| 8145055a      | 3.31E-07 | 1.15    | down | 1.75     | down | 1.22   | down | 1.49     | up   | BMP1              |
| 8060850a      | 5.33E-06 | 1.07    | up   | 1.27     | down | 1.12   | up   | 1.04     | down | BMP2              |
| 8096004a      | 5.01E-07 | 1.10    | down | 1.35     | down | 1.37   | down | 1.47     | up   | BMP2K             |
| 8132250a      | 7.52E-08 | 1.52    | down | 1.59     | up   | 2.19   | down | 1.16     | up   | BMPER             |
| 7952305a      | 1.35E-05 | 1.24    | down | 1.07     | down | 1.29   | down | 1.02     | down | BMPR1A            |
| 8047538a      | 2.23E-07 | 1.04    | up   | 1.62     | down | 1.13   | up   | 1.09     | up   | BMPR2             |
| 8115865a      | 3.16E-05 | 1.12    | up   | 1.16     | up   | 1.16   | up   | 1.28     | down | BOD1              |
| 8049876a      | 8.29E-05 | 1.21    | up   | 1.09     | down | 1.49   | up   | 1.08     | up   | BOK               |
| 7905092a      | 5.62E-05 | 1.34    | up   | 1.16     | down | 1.00   | up   | 1.36     | up   | BOLA1             |
| 8000692a      | 4.60E-06 | 1.40    | up   | 1.22     | up   | 1.28   | up   | 1.10     | up   | BOLA2;BOLA2B      |
| 8136341a      | 2.09E-06 | 1.20    | up   | 1.13     | down | 1.25   | up   | 1.18     | down | BPGM              |
| 8116635a      | 1.02E-06 | 1.65    | up   | 1.10     | down | 1.47   | up   | 1.22     | up   | BPHL;LOC100130927 |
| 8015769a      | 4.72E-09 | 1.00    | up   | 1.41     | up   | 1.17   | up   | 2.08     | down | BRCA1             |
| 8171006a      | 3.92E-07 | 1.05    | down | 1.83     | down | 1.58   | down | 1.14     | up   | BRCC3             |
| 8179504a      | 8.92E-08 | 1.37    | up   | 1.21     | up   | 1.47   | up   | 1.01     | up   | BRD2              |
| 7959777a      | 7.14E-05 | 1.11    | down | 1.50     | up   | 1.09   | up   | 1.08     | down | BRI3BP            |
| 8017262a      | 7.37E-06 | 1.25    | down | 1.69     | down | 1.04   | down | 1.09     | up   | BRIP1             |
| 8119034a      | 2.62E-05 | 1.20    | up   | 1.01     | up   | 1.24   | up   | 1.13     | down | BRPF3             |
| 8173766a      | 1.88E-05 | 1.21    | down | 1.71     | down | 1.44   | down | 1.11     | down | BRWD3             |

| Transcript ID | p-value  | Arsenic |      | Chromium |      | Nickel |      | Vanadium |      | Gene Symbol       |
|---------------|----------|---------|------|----------|------|--------|------|----------|------|-------------------|
|               |          | Δ       | Reg  | Δ        | Reg  | Δ      | Reg  | Δ        | Reg  |                   |
| 8094228a      | 8.74E-05 | 1.30    | up   | 1.60     | down | 1.21   | down | 1.75     | up   | BST1              |
| 7929201a      | 2.99E-09 | 1.28    | down | 1.26     | up   | 1.34   | down | 1.19     | down | BTAF1             |
| 8060988a      | 1.27E-08 | 2.41    | down | 1.20     | down | 1.82   | down | 1.12     | up   | BTBD3             |
| 7965423a      | 6.04E-05 | 1.46    | up   | 1.04     | down | 1.69   | up   | 1.19     | up   | BTG1              |
| 8069565a      | 3.37E-06 | 1.29    | up   | 1.41     | down | 1.04   | up   | 1.33     | up   | BTG3              |
| 8117485a      | 4.09E-06 | 1.41    | up   | 1.15     | down | 1.34   | up   | 1.17     | up   | BTN2A1            |
| 8117458a      | 6.43E-05 | 1.43    | up   | 1.48     | down | 1.51   | up   | 1.16     | up   | BTN3A1            |
| 8117435a      | 3.65E-05 | 1.46    | up   | 1.86     | down | 1.37   | up   | 1.38     | up   | BTN3A2            |
| 8054580a      | 3.31E-07 | 1.14    | up   | 1.16     | up   | 1.14   | up   | 1.17     | down | BUB1              |
| 7951826a      | 1.39E-06 | 1.01    | down | 1.30     | up   | 1.14   | up   | 1.29     | down | BUD13             |
| 8104825a      | 3.10E-05 | 1.25    | up   | 1.49     | up   | 1.20   | up   | 1.35     | down | BXDC2;RAD1        |
| 8119492a      | 9.76E-05 | 1.33    | up   | 1.33     | up   | 1.21   | up   | 1.07     | down | BYSL              |
| 8047339a      | 2.55E-05 | 1.19    | up   | 1.05     | up   | 1.19   | up   | 1.05     | down | BZW1L1            |
| 7929609a      | 1.15E-05 | 1.09    | down | 1.05     | up   | 1.45   | down | 1.10     | up   | C10orf12          |
| 7936918a      | 4.42E-05 | 1.04    | down | 1.25     | down | 1.24   | down | 1.30     | up   | C10orf122         |
| 7937208a      | 9.21E-06 | 1.39    | up   | 1.48     | down | 1.42   | up   | 1.79     | up   | C10orf125         |
| 7930162a      | 4.58E-06 | 1.22    | up   | 1.49     | down | 1.25   | up   | 1.31     | up   | C10orf26          |
| 7928671a      | 7.74E-06 | 1.42    | down | 1.27     | up   | 1.14   | down | 1.14     | down | C10orf57          |
| 7933488a      | 5.18E-07 | 1.24    | down | 1.03     | up   | 1.18   | down | 1.57     | up   | C10orf72          |
| 7939087a      | 4.43E-07 | 1.26    | up   | 1.21     | up   | 1.14   | up   | 1.31     | down | C11orf46          |
| 7943162a      | 1.92E-07 | 1.02    | down | 1.84     | up   | 1.01   | down | 1.59     | down | C11orf54          |
| 7943842a      | 2.47E-07 | 1.04    | down | 1.42     | up   | 1.19   | down | 1.44     | down | C11orf57          |
| 7944751a      | 6.42E-05 | 1.45    | up   | 1.03     | down | 1.83   | up   | 1.22     | down | C11orf63          |
| 7940493a      | 2.89E-05 | 1.23    | up   | 1.08     | up   | 1.26   | up   | 1.06     | down | C11orf66          |
| 7942783a      | 5.90E-05 | 1.14    | down | 1.58     | down | 1.06   | up   | 1.23     | up   | C11orf67;INTS4    |
| 7951004a      | 6.91E-08 | 1.50    | up   | 1.88     | up   | 1.03   | down | 1.82     | down | C11orf75          |
| 7941714a      | 4.71E-05 | 1.35    | down | 1.32     | down | 1.16   | down | 1.22     | up   | C11orf80;RCE1     |
| 7961964a      | 6.14E-05 | 1.11    | up   | 1.19     | up   | 1.24   | up   | 1.21     | down | C12orf11          |
| 7954711a      | 4.05E-06 | 1.12    | up   | 1.17     | down | 1.53   | up   | 1.22     | down | C12orf35          |
| 7967109a      | 2.13E-07 | 1.12    | up   | 1.32     | up   | 1.16   | up   | 1.24     | down | C12orf43          |
| 7955606a      | 4.31E-05 | 1.22    | up   | 1.14     | down | 1.10   | up   | 1.02     | up   | C12orf44          |
| 7958950a      | 5.55E-07 | 1.30    | up   | 1.47     | up   | 1.36   | up   | 1.02     | down | C12orf52          |
| 7953936a      | 7.87E-09 | 3.22    | up   | 2.22     | up   | 4.75   | up   | 7.37     | down | C12orf59          |
| 7964677a      | 3.60E-06 | 1.60    | up   | 1.52     | up   | 1.12   | up   | 1.18     | down | C12orf66          |
| 7971644a      | 4.17E-06 | 1.09    | down | 1.11     | down | 1.29   | down | 1.18     | up   | C13orf1           |
| 7968351a      | 2.11E-08 | 1.78    | down | 3.63     | down | 3.58   | down | 2.22     | up   | C13orf33          |
| 7980309a      | 1.19E-07 | 1.25    | up   | 1.34     | down | 1.27   | up   | 1.15     | up   | C14orf1           |
| 7980403a      | 7.47E-05 | 1.10    | up   | 1.32     | down | 1.02   | down | 1.37     | up   | C14orf133         |
| 7974771a      | 1.74E-05 | 1.09    | down | 1.35     | down | 1.07   | down | 1.54     | up   | C14orf135         |
| 7980690a      | 4.93E-05 | 1.07    | down | 1.35     | down | 1.03   | up   | 1.21     | up   | C14orf143         |
| 7979437a      | 8.19E-06 | 1.08    | up   | 1.54     | down | 1.31   | down | 1.58     | up   | C14orf149         |
| 7980338a      | 1.17E-08 | 1.18    | up   | 1.55     | down | 1.37   | up   | 1.36     | up   | C14orf4           |
| 7975081a      | 3.03E-05 | 1.48    | up   | 1.03     | up   | 1.08   | up   | 1.03     | up   | C14orf50          |
| 7985352a      | 9.60E-06 | 1.26    | up   | 1.08     | down | 1.10   | up   | 1.05     | down | C15orf26          |
| 7991049a      | 1.33E-08 | 1.16    | up   | 1.47     | down | 1.12   | up   | 1.35     | down | C15orf40          |
| 7983478a      | 1.04E-05 | 1.21    | up   | 1.59     | down | 1.04   | up   | 1.62     | up   | C15orf48          |
| 7982587a      | 2.76E-05 | 1.18    | down | 1.07     | up   | 1.21   | down | 1.18     | up   | C15orf53          |
| 7987526a      | 5.05E-07 | 1.19    | up   | 1.59     | down | 1.19   | up   | 1.09     | down | C15orf57;MRPL42P5 |
| 7984405a      | 4.21E-05 | 1.24    | up   | 1.35     | down | 1.32   | up   | 1.14     | down | C15orf61          |
| 8002992a      | 4.76E-06 | 1.35    | up   | 1.56     | up   | 1.38   | up   | 1.24     | down | C16orf46          |
| 7999160a      | 9.30E-05 | 1.03    | down | 1.23     | up   | 1.37   | down | 1.38     | up   | C16orf5           |
| 7994655a      | 1.94E-06 | 1.41    | up   | 1.33     | up   | 1.22   | up   | 1.03     | down | C16orf53          |
| 7997976a      | 3.28E-06 | 1.19    | up   | 1.27     | up   | 1.27   | up   | 1.14     | down | C16orf55          |



| Transcript ID | Arsenic  |          |      | Chromium |      | Nickel   |      | Vanadium |      | Gene Symbol      |
|---------------|----------|----------|------|----------|------|----------|------|----------|------|------------------|
|               | p-value  | $\Delta$ | Reg  | $\Delta$ | Reg  | $\Delta$ | Reg  | $\Delta$ | Reg  |                  |
| 8002987a      | 1.32E-05 | 1.28     | up   | 1.12     | up   | 1.45     | up   | 1.23     | down | C16orf61;CENPN   |
| 7993114a      | 1.13E-05 | 1.21     | up   | 1.51     | up   | 1.02     | down | 1.10     | down | C16orf68         |
| 7996403a      | 2.08E-06 | 1.01     | down | 1.14     | down | 1.05     | up   | 1.50     | up   | C16orf70         |
| 7993159a      | 6.43E-06 | 1.40     | up   | 1.25     | up   | 1.14     | up   | 1.06     | down | C16orf72         |
| 8003210a      | 1.02E-05 | 1.42     | up   | 1.24     | up   | 1.48     | up   | 1.13     | down | C16orf74         |
| 8001178a      | 2.82E-05 | 1.04     | up   | 1.34     | down | 1.01     | down | 1.95     | up   | C16orf87         |
| 7999903a      | 4.43E-06 | 1.53     | up   | 1.01     | up   | 1.27     | up   | 1.12     | up   | C16orf88         |
| 8000932a      | 1.19E-06 | 1.45     | up   | 1.23     | up   | 1.52     | up   | 1.03     | up   | C16orf93         |
| 8005305a      | 6.19E-09 | 1.04     | down | 1.41     | up   | 1.20     | down | 1.25     | down | C17orf39         |
| 8007569a      | 3.07E-07 | 1.02     | up   | 1.52     | up   | 1.11     | up   | 1.43     | down | C17orf53         |
| 8017831a      | 1.73E-06 | 1.42     | up   | 1.02     | up   | 1.35     | up   | 1.10     | down | C17orf58         |
| 8019507a      | 3.94E-05 | 1.16     | up   | 1.09     | down | 1.23     | up   | 1.02     | down | C17orf62         |
| 8013776a      | 5.81E-06 | 1.17     | up   | 1.11     | up   | 1.21     | up   | 1.46     | down | C17orf63         |
| 8012423a      | 9.70E-05 | 1.06     | down | 1.18     | up   | 1.23     | down | 1.45     | down | C17orf68         |
| 8007803a      | 5.82E-07 | 1.01     | down | 1.25     | up   | 1.03     | down | 1.37     | down | C17orf69         |
| 8004293a      | 8.20E-09 | 1.22     | up   | 1.38     | up   | 1.12     | up   | 1.32     | down | C17orf81         |
| 8019238a      | 4.14E-08 | 1.35     | up   | 1.01     | up   | 1.18     | up   | 1.07     | down | C17orf90         |
| 8022310a      | 3.04E-10 | 7.15     | up   | 1.14     | down | 12.43    | up   | 1.09     | up   | C18orf58         |
| 8027416a      | 5.48E-07 | 1.23     | down | 1.17     | up   | 1.45     | down | 1.01     | up   | C19orf2          |
| 8032127a      | 1.89E-05 | 1.08     | up   | 1.09     | down | 1.26     | up   | 1.18     | down | C19orf22         |
| 8028325a      | 4.36E-06 | 1.44     | down | 1.18     | down | 1.52     | down | 1.44     | up   | C19orf33;YIF1B   |
| 8027510a      | 5.61E-05 | 1.06     | up   | 1.14     | down | 1.08     | down | 1.30     | up   | C19orf40         |
| 8038624a      | 3.59E-05 | 1.19     | down | 1.16     | up   | 1.35     | down | 1.11     | up   | C19orf48         |
| 8036956a      | 9.14E-05 | 1.07     | up   | 1.39     | up   | 1.07     | down | 1.00     | up   | C19orf54         |
| 8030706a      | 9.02E-05 | 1.33     | down | 1.04     | up   | 1.37     | down | 1.12     | up   | C19orf63;FAM71E1 |
| 8029996a      | 3.32E-05 | 1.01     | down | 1.30     | up   | 1.06     | down | 1.14     | down | C19orf68         |
| 8052698a      | 3.51E-05 | 1.23     | up   | 1.05     | down | 1.03     | up   | 1.14     | down | C1D              |
| 8131475a      | 2.29E-07 | 1.03     | down | 1.24     | down | 1.43     | down | 1.60     | up   | C1GALT1          |
| 7909478a      | 3.18E-07 | 1.15     | up   | 1.56     | down | 1.19     | down | 1.20     | up   | C1orf107         |
| 7915045a      | 2.97E-05 | 1.05     | up   | 1.36     | up   | 1.10     | down | 1.04     | down | C1orf109         |
| 7909862a      | 3.22E-07 | 1.20     | up   | 1.37     | up   | 1.27     | up   | 1.49     | down | C1orf115         |
| 7898894a      | 1.17E-07 | 1.28     | up   | 1.46     | up   | 1.03     | up   | 1.04     | down | C1orf128         |
| 7925033a      | 4.00E-06 | 1.28     | up   | 1.27     | down | 1.02     | down | 1.09     | up   | C1orf131         |
| 7916219a      | 4.29E-06 | 1.20     | up   | 1.40     | up   | 1.14     | down | 1.06     | down | C1orf163         |
| 7913787a      | 2.31E-07 | 1.02     | up   | 1.46     | up   | 1.29     | down | 1.27     | up   | C1orf201         |
| 7915500a      | 7.02E-05 | 1.04     | up   | 1.43     | up   | 1.03     | up   | 1.08     | down | C1orf210         |
| 7908966a      | 8.97E-05 | 1.12     | up   | 1.01     | down | 1.43     | down | 1.41     | up   | C1orf217         |
| 7899394a      | 2.60E-07 | 1.45     | up   | 1.11     | up   | 1.45     | up   | 1.42     | down | C1orf38          |
| 7905154a      | 7.26E-05 | 1.15     | up   | 1.21     | up   | 1.22     | up   | 2.14     | up   | C1orf51          |
| 7905324a      | 2.26E-06 | 1.20     | up   | 1.26     | up   | 1.35     | down | 1.32     | down | C1orf56          |
| 7909931a      | 7.04E-05 | 1.20     | up   | 1.01     | up   | 1.13     | up   | 1.29     | down | C1orf58          |
| 7901592a      | 3.77E-06 | 1.30     | up   | 1.43     | up   | 1.14     | up   | 1.11     | down | C1orf83          |
| 7907404a      | 6.17E-06 | 1.21     | down | 1.08     | down | 1.48     | down | 1.24     | up   | C1orf9           |
| 8011850a      | 1.09E-05 | 1.10     | up   | 1.27     | up   | 1.02     | up   | 1.25     | down | C1QBP;RPAIN      |
| 7963061a      | 7.25E-06 | 1.37     | up   | 1.29     | up   | 2.00     | up   | 1.02     | down | C1QL4            |
| 7960744a      | 9.60E-05 | 1.35     | up   | 1.30     | down | 1.90     | up   | 1.07     | up   | C1R              |
| 7953603a      | 3.62E-05 | 2.24     | up   | 1.35     | down | 2.17     | up   | 1.05     | down | C1S              |
| 8179331a      | 7.80E-05 | 1.57     | up   | 1.17     | up   | 1.26     | up   | 1.05     | down | C2               |
| 8065612a      | 4.28E-07 | 1.34     | up   | 1.34     | down | 1.67     | up   | 1.34     | down | C20orf112        |
| 8065202a      | 9.71E-05 | 1.40     | down | 1.15     | up   | 1.45     | down | 1.19     | down | C20orf12         |
| 8061305a      | 9.22E-05 | 1.51     | down | 1.10     | down | 1.51     | down | 1.18     | down | C20orf19         |
| 8064637a      | 4.13E-08 | 2.07     | down | 1.19     | down | 2.43     | down | 1.03     | down | C20orf194        |
| 8060796a      | 1.16E-05 | 1.21     | down | 1.36     | down | 1.26     | down | 1.23     | up   | C20orf196        |

| Transcript ID | p-value  | Arsenic |      | Chromium |      | Nickel |      | Vanadium |      | Gene Symbol     |
|---------------|----------|---------|------|----------|------|--------|------|----------|------|-----------------|
|               |          | Δ       | Reg  | Δ        | Reg  | Δ      | Reg  | Δ        | Reg  |                 |
| 8064739a      | 5.68E-06 | 1.34    | down | 1.37     | up   | 1.38   | down | 1.16     | down | C20orf27        |
| 8060698a      | 3.05E-06 | 1.35    | down | 1.23     | up   | 1.31   | down | 1.16     | down | C20orf29        |
| 8065433a      | 2.33E-07 | 2.43    | down | 1.02     | down | 2.51   | down | 1.18     | up   | C20orf3         |
| 8064833a      | 2.60E-05 | 1.53    | down | 1.02     | down | 1.50   | down | 1.07     | down | C20orf30        |
| 8064388a      | 8.71E-05 | 1.22    | down | 1.09     | up   | 1.20   | down | 1.07     | up   | C20orf54        |
| 8061019a      | 5.25E-08 | 2.08    | down | 1.01     | down | 2.10   | down | 1.07     | down | C20orf7         |
| 8061129a      | 1.44E-07 | 1.76    | down | 1.11     | up   | 2.01   | down | 1.08     | up   | C20orf72        |
| 8068200a      | 2.90E-06 | 1.44    | up   | 1.07     | up   | 1.28   | up   | 1.33     | down | C21orf119       |
| 8070744a      | 2.66E-05 | 1.19    | up   | 1.04     | down | 1.19   | up   | 1.12     | down | C21orf2         |
| 8069026a      | 4.83E-07 | 1.21    | up   | 1.38     | up   | 1.08   | up   | 1.23     | down | C21orf33;PWP2   |
| 8067932a      | 6.48E-06 | 2.48    | up   | 1.87     | down | 1.28   | up   | 1.73     | up   | C21orf34        |
| 8069933a      | 3.66E-06 | 1.07    | down | 1.31     | up   | 1.10   | down | 1.26     | down | C21orf45        |
| 8069998a      | 8.46E-06 | 1.07    | up   | 1.50     | up   | 1.03   | up   | 1.15     | down | C21orf59        |
| 8070046a      | 9.43E-06 | 1.03    | down | 1.29     | up   | 1.11   | down | 1.41     | down | C21orf66        |
| 8069574a      | 1.51E-07 | 1.36    | up   | 1.85     | down | 1.07   | up   | 1.68     | up   | C21orf91        |
| 8071301a      | 6.59E-05 | 1.39    | up   | 1.14     | up   | 1.53   | up   | 1.13     | down | C22orf25        |
| 8075585a      | 8.72E-05 | 1.10    | up   | 1.27     | up   | 1.09   | up   | 1.21     | down | C22orf28        |
| 7944418a      | 2.36E-07 | 1.03    | down | 1.48     | up   | 1.14   | down | 1.33     | down | C2CD2L;DPAGT1   |
| 8059097a      | 1.50E-05 | 1.31    | up   | 1.34     | up   | 1.34   | up   | 1.00     | down | C2orf24         |
| 8043937a      | 4.53E-07 | 1.22    | up   | 1.15     | up   | 1.18   | up   | 1.00     | up   | C2orf29         |
| 8053288a      | 8.54E-05 | 1.22    | up   | 1.00     | down | 1.14   | up   | 1.25     | down | C2orf3          |
| 8052834a      | 1.03E-05 | 1.23    | up   | 1.10     | down | 1.24   | up   | 1.01     | down | C2orf42         |
| 8047265a      | 1.31E-05 | 1.39    | up   | 1.27     | up   | 1.24   | up   | 1.02     | down | C2orf47;C2orf60 |
| 8044127a      | 1.96E-07 | 1.28    | up   | 1.12     | down | 1.26   | up   | 1.17     | down | C2orf49         |
| 8041495a      | 2.81E-05 | 1.17    | up   | 1.22     | up   | 1.24   | up   | 1.22     | down | C2orf56         |
| 8058108a      | 7.52E-07 | 1.24    | up   | 1.11     | down | 1.22   | up   | 1.14     | down | C2orf60         |
| 8053248a      | 6.19E-07 | 1.23    | up   | 3.47     | up   | 1.65   | up   | 2.12     | down | C2orf65         |
| 8058570a      | 2.40E-05 | 1.13    | up   | 1.37     | down | 1.26   | down | 1.19     | up   | C2orf67         |
| 8077770a      | 3.13E-05 | 1.12    | down | 1.45     | down | 1.09   | down | 1.02     | down | C3orf10         |
| 8091629a      | 1.09E-05 | 1.07    | up   | 1.60     | up   | 1.04   | up   | 1.42     | down | C3orf33         |
| 8082504a      | 3.93E-05 | 1.21    | up   | 1.18     | up   | 1.37   | up   | 1.21     | down | C3orf37         |
| 8083599a      | 7.66E-05 | 2.30    | up   | 1.17     | up   | 1.12   | down | 1.14     | down | C3orf55         |
| 8083223a      | 1.02E-06 | 1.89    | up   | 2.36     | up   | 1.19   | up   | 1.36     | down | C3orf58         |
| 8092765a      | 2.32E-06 | 1.35    | down | 1.21     | down | 1.19   | down | 1.25     | up   | C3orf59         |
| 8088680a      | 5.08E-07 | 1.81    | down | 1.90     | down | 1.40   | down | 1.24     | up   | C3orf64         |
| 8088436a      | 1.48E-07 | 1.11    | down | 1.25     | down | 1.09   | down | 1.85     | up   | C3orf67         |
| 8094070a      | 2.56E-05 | 1.03    | down | 1.17     | up   | 1.05   | down | 1.40     | down | C4orf23         |
| 8103684a      | 4.35E-07 | 1.09    | down | 1.61     | down | 1.00   | down | 1.20     | up   | C4orf27         |
| 8097373a      | 3.32E-05 | 1.03    | up   | 1.61     | down | 1.05   | up   | 1.01     | up   | C4orf29         |
| 8098512a      | 1.75E-05 | 1.29    | down | 1.54     | down | 1.16   | down | 1.11     | up   | C4orf41         |
| 7991777a      | 4.05E-05 | 1.02    | up   | 1.52     | down | 1.10   | up   | 1.02     | up   | C4orf46         |
| 8102831a      | 2.28E-05 | 1.31    | up   | 1.81     | down | 1.77   | up   | 1.64     | down | C4orf49         |
| 8113504a      | 9.06E-09 | 1.61    | down | 3.41     | down | 2.32   | down | 2.53     | up   | C5orf13         |
| 8104680a      | 2.63E-06 | 1.37    | up   | 1.64     | up   | 1.43   | up   | 1.39     | down | C5orf22         |
| 8104758a      | 1.30E-08 | 1.38    | up   | 22.72    | down | 1.64   | down | 2.22     | up   | C5orf23         |
| 8110147a      | 1.30E-09 | 2.23    | down | 3.95     | up   | 2.48   | up   | 4.99     | down | C5orf25         |
| 8107321a      | 4.02E-05 | 1.35    | down | 1.14     | up   | 1.44   | down | 1.03     | down | C5orf26         |
| 8111552a      | 5.80E-05 | 1.40    | up   | 1.30     | up   | 1.31   | up   | 1.19     | down | C5orf33         |
| 8111960a      | 5.67E-05 | 1.36    | up   | 1.26     | up   | 1.46   | up   | 1.17     | down | C5orf34         |
| 8112302a      | 4.40E-08 | 1.29    | down | 1.32     | down | 1.08   | down | 1.53     | up   | C5orf43         |
| 8105647a      | 2.55E-07 | 1.62    | down | 1.54     | down | 1.23   | down | 1.47     | up   | C5orf44         |
| 8105661a      | 3.69E-06 | 1.67    | down | 1.27     | down | 1.17   | down | 1.34     | up   | C5orf44         |
| 8105104a      | 1.31E-05 | 1.21    | up   | 1.41     | up   | 1.18   | up   | 1.35     | down | C5orf51         |

| Transcript ID | p-value  | Arsenic  |      | Chromium |      | Nickel   |      | Vanadium |      | Gene Symbol    |
|---------------|----------|----------|------|----------|------|----------|------|----------|------|----------------|
|               |          | $\Delta$ | Reg  | $\Delta$ | Reg  | $\Delta$ | Reg  | $\Delta$ | Reg  |                |
| 8110681a      | 4.63E-07 | 1.41     | up   | 1.25     | up   | 1.37     | up   | 1.00     | down | C5orf55        |
| 8125850a      | 2.85E-10 | 1.46     | up   | 1.10     | up   | 1.60     | up   | 1.17     | down | C6orf106       |
| 8125775a      | 1.56E-07 | 1.22     | up   | 1.26     | down | 1.37     | up   | 1.13     | up   | C6orf125       |
| 8126382a      | 1.54E-05 | 1.23     | down | 1.18     | down | 1.79     | down | 1.39     | up   | C6orf132       |
| 8179149a      | 8.24E-06 | 1.45     | up   | 1.06     | down | 1.38     | up   | 1.10     | up   | C6orf134       |
| 8123678a      | 8.90E-08 | 1.29     | up   | 1.77     | down | 1.37     | up   | 1.09     | up   | C6orf145       |
| 8119661a      | 4.72E-05 | 1.21     | up   | 1.18     | up   | 1.22     | up   | 1.02     | up   | C6orf153       |
| 8128329a      | 5.97E-05 | 1.02     | down | 1.17     | up   | 1.19     | up   | 1.15     | down | C6orf167       |
| 8116696a      | 4.21E-05 | 1.06     | up   | 1.21     | down | 1.16     | up   | 1.04     | up   | C6orf201       |
| 8179808a      | 5.08E-07 | 1.44     | up   | 1.09     | down | 1.61     | up   | 1.07     | up   | C6orf47        |
| 8131044a      | 6.74E-05 | 1.24     | up   | 1.18     | up   | 1.28     | up   | 1.09     | down | C7orf20        |
| 8131427a      | 2.98E-05 | 1.06     | up   | 1.31     | up   | 1.19     | up   | 1.20     | down | C7orf26        |
| 8137219a      | 2.69E-05 | 1.08     | up   | 1.07     | up   | 1.60     | down | 1.62     | down | C7orf29        |
| 8138647a      | 1.65E-05 | 1.58     | up   | 1.13     | down | 1.78     | up   | 1.11     | up   | C7orf31        |
| 8131881a      | 4.63E-07 | 1.34     | down | 1.35     | up   | 2.53     | down | 2.04     | down | C7orf46        |
| 8141517a      | 8.16E-05 | 1.11     | up   | 1.05     | down | 1.20     | up   | 1.11     | up   | C7orf47        |
| 8137700a      | 1.73E-06 | 1.20     | up   | 1.35     | up   | 1.28     | up   | 1.07     | down | C7orf50        |
| 8135734a      | 4.73E-06 | 1.70     | up   | 1.77     | down | 1.03     | down | 1.56     | up   | C7orf58        |
| 8134740a      | 1.22E-06 | 1.32     | up   | 1.12     | down | 1.34     | up   | 1.02     | up   | C7orf59        |
| 8134051a      | 1.29E-05 | 1.26     | up   | 1.72     | up   | 1.61     | up   | 1.39     | down | C7orf63        |
| 8149315a      | 1.32E-07 | 2.56     | down | 1.08     | down | 2.01     | down | 1.13     | down | C8orf15        |
| 8151898a      | 8.54E-05 | 1.26     | up   | 1.19     | down | 1.47     | up   | 1.17     | down | C8orf37        |
| 8146703a      | 1.67E-06 | 1.10     | down | 1.23     | up   | 1.24     | down | 1.70     | down | C8orf46        |
| 8145193a      | 4.68E-06 | 1.18     | up   | 1.17     | down | 1.19     | up   | 1.02     | up   | C8orf58;PDLIM2 |
| 8152648a      | 8.80E-07 | 1.25     | up   | 1.02     | up   | 1.32     | up   | 1.41     | down | C8orf76        |
| 8144712a      | 8.15E-07 | 1.28     | up   | 1.21     | down | 1.40     | up   | 1.02     | up   | C8orf79        |
| 8156116a      | 9.28E-05 | 1.40     | up   | 1.40     | up   | 1.12     | up   | 1.56     | down | C9orf103       |
| 8164481a      | 8.80E-06 | 1.02     | down | 1.20     | up   | 1.01     | up   | 1.49     | down | C9orf114;ENDOG |
| 8160912a      | 9.05E-05 | 1.47     | up   | 1.05     | up   | 1.03     | down | 1.22     | down | C9orf131       |
| 8154381a      | 6.00E-08 | 1.78     | up   | 1.06     | down | 2.61     | up   | 5.27     | up   | C9orf150       |
| 8160835a      | 1.62E-07 | 1.42     | up   | 1.04     | up   | 1.15     | up   | 1.17     | down | C9orf23        |
| 8156573a      | 1.76E-05 | 1.13     | down | 1.60     | down | 1.03     | up   | 1.04     | down | C9orf3         |
| 8161829a      | 3.32E-05 | 1.09     | down | 1.23     | up   | 1.42     | down | 1.38     | down | C9orf41        |
| 8164008a      | 4.98E-07 | 1.65     | down | 1.64     | up   | 1.18     | down | 1.87     | down | C9orf45        |
| 8157144a      | 1.04E-05 | 1.06     | down | 1.76     | up   | 1.23     | up   | 1.58     | down | C9orf6;IKBKAP  |
| 8155794a      | 4.18E-05 | 1.01     | down | 1.30     | up   | 1.16     | down | 1.43     | down | C9orf85        |
| 8158930a      | 6.69E-05 | 1.05     | up   | 1.21     | up   | 1.21     | up   | 1.35     | down | C9orf9;C9orf98 |
| 7989501a      | 7.39E-08 | 1.06     | up   | 1.02     | up   | 1.35     | down | 2.86     | up   | CA12           |
| 8071823a      | 3.27E-05 | 1.17     | up   | 1.21     | up   | 1.20     | up   | 1.11     | down | CABIN1         |
| 8067495a      | 8.38E-06 | 1.21     | up   | 1.22     | down | 1.44     | up   | 1.31     | up   | CABLES2        |
| 7901993a      | 1.59E-08 | 3.31     | up   | 1.07     | up   | 3.12     | up   | 2.26     | down | CACHD1         |
| 8140579a      | 6.22E-07 | 5.22     | up   | 2.86     | up   | 1.11     | up   | 1.00     | down | CACNA2D1       |
| 7955142a      | 4.48E-07 | 1.03     | down | 1.68     | down | 1.09     | up   | 1.24     | up   | CACNB3         |
| 8009334a      | 7.51E-07 | 2.19     | down | 3.71     | down | 1.17     | up   | 2.35     | up   | CACNG4         |
| 8040843a      | 1.60E-06 | 1.19     | up   | 1.57     | up   | 1.07     | up   | 1.09     | down | CAD            |
| 8057578a      | 2.82E-05 | 1.43     | up   | 1.24     | up   | 1.08     | up   | 1.05     | down | CALCRL         |
| 7976200a      | 1.09E-05 | 1.14     | up   | 1.35     | down | 1.06     | up   | 1.15     | up   | CALM1          |
| 7926223a      | 2.07E-06 | 1.06     | down | 2.41     | down | 1.26     | down | 1.15     | down | CAMK1D         |
| 7909425a      | 1.74E-05 | 1.08     | up   | 1.20     | up   | 1.04     | down | 2.25     | up   | CAMK1G         |
| 8139330a      | 5.99E-10 | 1.13     | down | 1.40     | up   | 1.10     | up   | 2.14     | down | CAMK2B         |
| 8117054a      | 2.82E-08 | 1.23     | up   | 1.38     | down | 1.30     | up   | 1.26     | up   | CAP2           |
| 7909967a      | 7.12E-05 | 1.10     | down | 1.33     | down | 1.21     | down | 1.37     | up   | CAPN2          |
| 7942697a      | 4.48E-05 | 1.39     | up   | 1.07     | down | 1.19     | up   | 1.19     | up   | CAPN5          |

| Transcript ID | p-value  | Arsenic |      | Chromium |      | Nickel |      | Vanadium |      | Gene Symbol        |
|---------------|----------|---------|------|----------|------|--------|------|----------|------|--------------------|
|               |          | Δ       | Reg  | Δ        | Reg  | Δ      | Reg  | Δ        | Reg  |                    |
| 7939242a      | 1.32E-05 | 1.08    | up   | 1.17     | up   | 1.02   | up   | 1.09     | down | CAPRIN1            |
| 7913169a      | 1.06E-05 | 1.02    | up   | 1.08     | up   | 1.07   | down | 1.20     | up   | CAPZB              |
| 8075934a      | 9.89E-06 | 1.04    | down | 1.29     | down | 1.01   | down | 1.18     | up   | CARD10             |
| 8137874a      | 1.77E-07 | 1.34    | down | 2.19     | up   | 1.16   | up   | 3.86     | down | CARD11             |
| 7951408a      | 7.98E-10 | 1.82    | up   | 2.51     | down | 1.40   | up   | 1.10     | down | CARD16             |
| 7999319a      | 2.36E-05 | 1.34    | up   | 1.20     | up   | 1.35   | up   | 1.09     | down | CARHSP1            |
| 7945803a      | 9.77E-05 | 1.02    | down | 1.53     | up   | 1.09   | down | 1.08     | up   | CARS               |
| 8007028a      | 7.14E-05 | 1.02    | down | 1.14     | up   | 1.04   | up   | 1.53     | down | CASC3              |
| 7983321a      | 5.26E-05 | 1.05    | down | 1.22     | down | 1.14   | up   | 1.21     | down | CASC4              |
| 7982757a      | 2.47E-05 | 1.17    | down | 1.47     | down | 1.07   | up   | 1.42     | down | CASC5              |
| 8134318a      | 1.50E-05 | 1.33    | up   | 1.09     | up   | 1.21   | up   | 1.22     | down | CASD1              |
| 8172158a      | 3.18E-08 | 1.36    | down | 1.75     | down | 1.61   | down | 1.67     | up   | CASK               |
| 8047403a      | 1.66E-05 | 1.57    | up   | 1.35     | down | 1.33   | up   | 1.11     | down | CASP10             |
| 7951372a      | 4.52E-06 | 1.36    | up   | 2.74     | up   | 1.01   | up   | 1.78     | down | CASP4              |
| 8102311a      | 3.17E-05 | 1.04    | up   | 1.40     | down | 1.09   | down | 1.27     | up   | CASP6              |
| 7930577a      | 1.65E-05 | 1.03    | down | 1.29     | down | 1.33   | down | 1.33     | up   | CASP7              |
| 8107005a      | 1.63E-05 | 1.08    | down | 1.34     | down | 1.12   | up   | 1.52     | up   | CAST               |
| 8135594a      | 3.73E-05 | 1.27    | up   | 1.27     | down | 1.18   | up   | 1.41     | up   | CAV1               |
| 8135587a      | 1.24E-06 | 1.28    | up   | 1.55     | down | 1.32   | up   | 1.36     | up   | CAV2               |
| 7944493a      | 4.79E-05 | 1.07    | up   | 1.47     | up   | 1.06   | up   | 1.24     | down | CBL                |
| 8068401a      | 3.93E-06 | 1.35    | up   | 1.50     | up   | 1.11   | up   | 1.23     | down | CBR1               |
| 8010320a      | 2.14E-08 | 1.23    | up   | 1.25     | up   | 1.68   | up   | 1.23     | down | CBX2               |
| 8019010a      | 3.36E-06 | 1.09    | up   | 1.26     | up   | 1.23   | up   | 1.08     | down | CBX8               |
| 8007707a      | 1.14E-05 | 1.15    | up   | 1.40     | up   | 1.02   | up   | 1.20     | down | CCDC103            |
| 8096808a      | 1.39E-05 | 1.25    | down | 1.39     | down | 1.29   | down | 1.31     | up   | CCDC109B           |
| 8113602a      | 2.28E-06 | 1.10    | down | 1.69     | up   | 1.44   | down | 1.61     | down | CCDC112            |
| 7996198a      | 8.90E-05 | 1.47    | up   | 2.77     | up   | 1.50   | up   | 1.30     | down | CCDC113            |
| 8055208a      | 2.46E-07 | 1.51    | up   | 1.08     | up   | 1.32   | up   | 1.18     | up   | CCDC115            |
| 8073513a      | 8.84E-07 | 1.06    | down | 1.45     | up   | 1.12   | down | 1.08     | down | CCDC134            |
| 8010629a      | 5.62E-07 | 1.25    | up   | 1.30     | up   | 1.11   | up   | 1.02     | down | CCDC137            |
| 8013479a      | 6.58E-06 | 1.27    | up   | 1.08     | down | 1.13   | up   | 1.34     | down | CCDC144NL;CCDC144C |
| 7930320a      | 8.91E-09 | 1.16    | down | 1.03     | down | 1.16   | down | 1.31     | up   | CCDC147            |
| 7944913a      | 3.01E-05 | 1.07    | down | 1.65     | down | 1.09   | up   | 1.16     | up   | CCDC15             |
| 8030299a      | 4.41E-05 | 1.03    | up   | 1.26     | up   | 1.03   | up   | 1.04     | down | CCDC155            |
| 7899134a      | 2.46E-05 | 1.04    | down | 1.39     | up   | 1.01   | up   | 1.06     | up   | CCDC21             |
| 8167457a      | 9.71E-06 | 1.03    | up   | 1.34     | down | 1.00   | down | 1.02     | up   | CCDC22             |
| 7900944a      | 2.16E-07 | 1.27    | up   | 1.07     | down | 1.35   | up   | 1.03     | up   | CCDC24;SLC6A9      |
| 8122327a      | 2.59E-07 | 1.01    | up   | 1.15     | up   | 1.43   | up   | 1.32     | down | CCDC28A            |
| 7932082a      | 2.20E-07 | 2.56    | up   | 1.21     | up   | 1.81   | up   | 2.86     | down | CCDC3              |
| 7947189a      | 1.47E-05 | 1.34    | up   | 1.22     | up   | 1.40   | up   | 1.09     | down | CCDC34             |
| 8016088a      | 2.71E-06 | 1.01    | up   | 1.70     | up   | 1.14   | down | 1.63     | down | CCDC43             |
| 8014738a      | 1.21E-05 | 1.10    | up   | 1.16     | up   | 1.01   | up   | 1.46     | down | CCDC49             |
| 8006112a      | 6.86E-07 | 1.22    | up   | 1.05     | up   | 1.17   | up   | 1.99     | down | CCDC55             |
| 8015712a      | 9.63E-05 | 1.06    | up   | 1.19     | up   | 1.01   | up   | 1.69     | down | CCDC56             |
| 8023401a      | 3.68E-08 | 2.84    | up   | 2.12     | down | 3.09   | up   | 1.03     | down | CCDC68             |
| 8055173a      | 1.21E-07 | 1.08    | up   | 1.05     | up   | 1.70   | up   | 1.16     | down | CCDC74A;CCDC74B    |
| 8037762a      | 6.11E-08 | 1.16    | down | 1.53     | up   | 1.18   | down | 1.93     | down | CCDC8              |
| 8089544a      | 3.55E-06 | 1.71    | down | 1.24     | down | 2.74   | down | 1.25     | up   | CCDC80             |
| 7944365a      | 7.96E-05 | 1.30    | down | 1.39     | up   | 1.00   | down | 1.37     | down | CCDC84             |
| 7941457a      | 3.12E-05 | 1.24    | up   | 1.07     | down | 1.30   | up   | 1.10     | down | CCDC85B            |
| 7949668a      | 2.34E-05 | 1.07    | up   | 1.31     | up   | 1.05   | up   | 1.04     | down | CCDC87             |
| 8052269a      | 2.95E-05 | 1.23    | up   | 1.28     | down | 1.15   | up   | 1.23     | down | CCDC88A            |
| 7980828a      | 5.43E-09 | 1.00    | down | 2.23     | up   | 2.30   | up   | 6.01     | down | CCDC88C            |

| Transcript ID | p-value  | Arsenic  |      | Chromium |      | Nickel   |      | Vanadium |      | Gene Symbol   |
|---------------|----------|----------|------|----------|------|----------|------|----------|------|---------------|
|               |          | $\Delta$ | Reg  | $\Delta$ | Reg  | $\Delta$ | Reg  | $\Delta$ | Reg  |               |
| 8124008a      | 6.27E-06 | 1.40     | up   | 1.31     | up   | 1.48     | up   | 1.06     | up   | CCDC90A       |
| 8155200a      | 7.20E-07 | 1.12     | down | 1.45     | down | 1.22     | down | 1.61     | up   | CCIN          |
| 8006433a      | 4.25E-06 | 2.28     | up   | 2.29     | down | 1.51     | up   | 2.32     | down | CCL2          |
| 8132646a      | 1.86E-07 | 1.23     | up   | 1.24     | down | 1.34     | up   | 1.15     | up   | CCM2          |
| 7968637a      | 2.02E-06 | 1.03     | up   | 1.06     | up   | 1.03     | down | 2.95     | down | CCNA1         |
| 8102643a      | 7.88E-07 | 1.12     | down | 1.32     | down | 1.00     | down | 1.21     | up   | CCNA2         |
| 7992594a      | 4.29E-05 | 1.05     | down | 1.01     | down | 1.18     | down | 1.41     | up   | CCNF          |
| 8095870a      | 9.27E-05 | 1.15     | down | 1.24     | down | 1.02     | down | 1.60     | up   | CCNG2         |
| 8113010a      | 3.19E-05 | 1.08     | down | 1.46     | down | 1.09     | up   | 1.18     | up   | CCNH          |
| 8101212a      | 4.34E-05 | 1.12     | down | 1.16     | down | 1.01     | down | 1.08     | up   | CCNI          |
| 7929550a      | 1.19E-06 | 1.15     | down | 1.28     | up   | 1.09     | down | 1.27     | down | CCNJ          |
| 7927008a      | 9.27E-06 | 1.12     | down | 1.33     | down | 1.23     | down | 1.19     | up   | CCNY          |
| 7989037a      | 2.48E-05 | 1.06     | down | 1.96     | down | 1.21     | up   | 1.10     | down | CCPG1;DYX1C1  |
| 8052562a      | 1.32E-07 | 1.11     | up   | 1.40     | up   | 1.06     | up   | 1.20     | down | CCT4          |
| 8104449a      | 7.34E-05 | 1.15     | up   | 1.37     | up   | 1.16     | up   | 1.10     | down | CCT5          |
| 8042720a      | 8.73E-05 | 1.05     | up   | 1.20     | up   | 1.06     | up   | 1.09     | down | CCT7          |
| 8120719a      | 1.81E-08 | 1.33     | down | 2.63     | down | 1.05     | down | 3.44     | up   | CD109         |
| 8081657a      | 5.61E-07 | 1.64     | down | 2.98     | down | 2.21     | down | 2.55     | up   | CD200         |
| 8177222a      | 7.52E-08 | 1.61     | down | 7.59     | down | 2.26     | down | 11.42    | up   | CD24          |
| 8000848a      | 1.30E-05 | 1.47     | up   | 1.23     | up   | 1.32     | up   | 1.09     | up   | CD2BP2        |
| 8063156a      | 1.90E-07 | 1.44     | down | 1.12     | down | 1.49     | down | 1.08     | up   | CD40          |
| 7918902a      | 6.87E-06 | 1.15     | down | 1.27     | down | 1.05     | down | 1.35     | up   | CD58          |
| 7963911a      | 4.25E-05 | 1.01     | down | 1.09     | down | 1.01     | down | 1.31     | up   | CD63          |
| 8004510a      | 4.19E-05 | 2.32     | up   | 1.55     | up   | 1.73     | up   | 1.29     | up   | CD68          |
| 7939546a      | 6.50E-05 | 1.32     | up   | 2.22     | up   | 1.54     | up   | 1.27     | up   | CD82          |
| 8176360a      | 5.36E-07 | 1.29     | up   | 1.46     | up   | 1.92     | up   | 1.45     | down | CD99          |
| 7900699a      | 1.74E-06 | 1.02     | down | 1.25     | up   | 1.05     | down | 1.18     | down | CDC20         |
| 8142878a      | 9.72E-07 | 1.05     | down | 1.32     | up   | 1.26     | down | 1.69     | down | CDC26         |
| 8163481a      | 2.46E-05 | 1.20     | up   | 1.21     | up   | 1.06     | up   | 1.84     | down | CDC26         |
| 7924773a      | 3.03E-05 | 1.13     | down | 1.61     | down | 1.15     | down | 1.32     | up   | CDC42BPA      |
| 7981387a      | 1.22E-05 | 1.16     | up   | 1.29     | down | 1.20     | up   | 1.14     | up   | CDC42BPB      |
| 7919888a      | 1.92E-07 | 1.02     | up   | 1.43     | down | 1.26     | down | 1.24     | up   | CDC42SE1      |
| 8120022a      | 1.08E-06 | 1.05     | up   | 1.24     | up   | 1.12     | up   | 1.14     | down | CDC5L         |
| 8007071a      | 1.60E-07 | 1.03     | up   | 1.36     | up   | 1.03     | down | 1.49     | down | CDC6          |
| 7902913a      | 2.19E-05 | 1.13     | down | 1.28     | up   | 1.25     | down | 1.11     | down | CDC7          |
| 7981525a      | 7.01E-06 | 1.16     | up   | 1.32     | down | 1.31     | up   | 1.35     | up   | CDCA4         |
| 8138489a      | 6.00E-08 | 1.02     | up   | 1.81     | up   | 1.42     | down | 1.04     | up   | CDCA7L        |
| 7900167a      | 2.70E-06 | 1.09     | down | 1.36     | up   | 1.14     | down | 1.15     | down | CDCA8         |
| 8081838a      | 1.07E-05 | 1.54     | up   | 2.13     | down | 1.26     | up   | 1.47     | up   | CDGAP         |
| 7997504a      | 2.07E-06 | 3.24     | down | 1.08     | down | 2.29     | down | 1.61     | up   | CDH13         |
| 7977888a      | 1.36E-06 | 1.18     | up   | 1.32     | down | 1.03     | up   | 1.39     | up   | CDH24         |
| 7996819a      | 5.46E-07 | 1.75     | up   | 1.08     | down | 1.54     | down | 1.35     | up   | CDH3          |
| 8104663a      | 3.92E-08 | 2.89     | up   | 5.41     | up   | 1.02     | up   | 3.58     | down | CDH6          |
| 8000706a      | 1.13E-06 | 1.44     | up   | 1.26     | up   | 1.30     | up   | 1.07     | up   | CDIPT         |
| 7997982a      | 2.12E-09 | 1.19     | up   | 1.63     | up   | 1.67     | up   | 1.36     | down | CDK10         |
| 7956076a      | 9.18E-05 | 1.11     | up   | 1.15     | down | 1.19     | up   | 1.11     | up   | CDK2          |
| 8143850a      | 2.87E-07 | 1.00     | down | 1.45     | down | 1.25     | up   | 1.31     | up   | CDK5          |
| 8006409a      | 3.18E-08 | 1.04     | down | 1.40     | up   | 1.17     | down | 1.51     | down | CDK5R1        |
| 8140955a      | 5.72E-06 | 1.58     | down | 1.14     | up   | 1.75     | down | 1.31     | down | CDK6          |
| 7932177a      | 9.09E-05 | 1.14     | up   | 1.12     | up   | 1.05     | down | 1.30     | down | CDNF          |
| 8012918a      | 9.07E-05 | 1.43     | up   | 1.25     | up   | 1.19     | up   | 1.14     | down | CDRT4;FAM18B2 |
| 8060772a      | 1.99E-06 | 1.74     | down | 1.02     | down | 1.61     | down | 1.03     | down | CDS2          |
| 7997839a      | 4.21E-09 | 1.47     | up   | 1.57     | up   | 1.92     | up   | 1.18     | down | CDT1          |

| Transcript ID | p-value  | Arsenic  |      | Chromium |      | Nickel   |      | Vanadium |      | Gene Symbol      |
|---------------|----------|----------|------|----------|------|----------|------|----------|------|------------------|
|               |          | $\Delta$ | Reg  | $\Delta$ | Reg  | $\Delta$ | Reg  | $\Delta$ | Reg  |                  |
| 8116710a      | 1.82E-10 | 1.34     | up   | 1.11     | up   | 1.31     | up   | 1.02     | up   | CDYL             |
| 8150592a      | 4.11E-06 | 1.21     | up   | 1.01     | down | 1.23     | up   | 1.53     | down | CEBPD            |
| 8027566a      | 8.89E-05 | 1.18     | down | 1.10     | up   | 1.20     | down | 1.07     | down | CEBPG            |
| 8087145a      | 1.31E-06 | 1.06     | up   | 1.06     | up   | 1.39     | down | 1.39     | up   | CELSR3           |
| 8003553a      | 2.76E-09 | 2.15     | up   | 1.29     | up   | 2.48     | up   | 1.24     | down | CENPBD1          |
| 8105842a      | 1.09E-05 | 1.27     | down | 1.47     | down | 1.04     | down | 1.77     | up   | CENPH            |
| 8168794a      | 2.70E-07 | 1.05     | up   | 1.54     | down | 1.11     | up   | 1.08     | down | CENPI            |
| 8112376a      | 1.29E-09 | 1.79     | down | 1.63     | down | 1.19     | down | 1.55     | up   | CENPK            |
| 7997381a      | 5.26E-06 | 1.23     | up   | 1.21     | up   | 1.32     | up   | 1.26     | down | CENPN            |
| 8002104a      | 2.30E-06 | 1.14     | down | 1.40     | down | 1.17     | down | 1.35     | up   | CENPT            |
| 8157534a      | 8.34E-06 | 1.20     | down | 1.20     | up   | 1.03     | up   | 2.02     | down | CEP110           |
| 7944113a      | 6.02E-06 | 1.00     | down | 1.39     | up   | 1.04     | up   | 1.09     | down | CEP164           |
| 7943297a      | 7.77E-09 | 1.24     | down | 1.84     | up   | 1.14     | down | 1.30     | down | CEP57            |
| 8156026a      | 4.76E-05 | 1.21     | down | 1.22     | up   | 1.04     | down | 1.44     | down | CEP78            |
| 7996345a      | 1.11E-05 | 1.45     | up   | 1.21     | down | 1.40     | up   | 1.63     | up   | CES2             |
| 8175755a      | 9.19E-09 | 1.11     | down | 1.53     | down | 1.03     | down | 1.32     | up   | CETN2            |
| 8002865a      | 3.79E-06 | 1.11     | up   | 1.59     | down | 1.13     | up   | 1.59     | up   | CFDP1;C17orf60   |
| 7978586a      | 3.99E-06 | 1.22     | up   | 1.23     | down | 1.03     | down | 1.38     | up   | CFL2             |
| 8038299a      | 6.93E-08 | 1.14     | down | 1.27     | down | 1.16     | down | 1.58     | up   | CGB7;CGB5;CGB1-2 |
| 8051001a      | 2.28E-05 | 1.27     | down | 1.35     | up   | 1.43     | down | 1.02     | down | CGREF1           |
| 8041961a      | 1.03E-05 | 1.31     | up   | 1.23     | up   | 1.04     | up   | 1.39     | down | CHAC2            |
| 8068478a      | 1.58E-07 | 1.20     | up   | 1.21     | up   | 1.23     | up   | 1.12     | down | CHAF1B           |
| 8004699a      | 6.08E-05 | 1.25     | up   | 1.06     | down | 1.36     | up   | 1.08     | down | CHD3             |
| 7995583a      | 1.43E-06 | 1.01     | down | 1.74     | down | 1.01     | down | 1.85     | up   | CHD9             |
| 8100382a      | 1.84E-06 | 1.31     | down | 1.79     | down | 1.36     | down | 1.44     | up   | CHIC2            |
| 7945579a      | 3.76E-05 | 1.08     | up   | 1.25     | up   | 1.08     | up   | 1.13     | down | CHID1            |
| 8003467a      | 3.48E-06 | 1.45     | up   | 1.36     | up   | 1.61     | up   | 1.09     | down | CHMP1A           |
| 8147057a      | 5.68E-05 | 1.05     | up   | 1.66     | up   | 1.06     | up   | 1.17     | down | CHMP4C           |
| 8010550a      | 7.84E-07 | 1.17     | up   | 1.20     | up   | 1.26     | up   | 1.40     | down | CHMP6            |
| 8056890a      | 3.39E-05 | 1.37     | up   | 1.03     | up   | 1.47     | up   | 1.54     | down | CHN1             |
| 7950983a      | 3.69E-08 | 1.11     | down | 2.27     | up   | 1.29     | down | 1.66     | down | CHORDC1          |
| 8174513a      | 1.13E-07 | 1.46     | down | 14.29    | up   | 2.93     | down | 1.10     | up   | CHRDL1           |
| 7950425a      | 1.05E-07 | 1.07     | down | 1.48     | down | 1.05     | down | 1.03     | up   | CHRDL2           |
| 7987012a      | 1.53E-05 | 1.74     | up   | 1.28     | down | 2.17     | up   | 1.08     | up   | CHRFAM7A;CHRNA7  |
| 7910915a      | 6.02E-06 | 1.07     | up   | 5.19     | up   | 1.39     | up   | 1.45     | down | CHRM3            |
| 8004416a      | 3.91E-05 | 1.43     | down | 1.59     | up   | 1.34     | down | 2.36     | down | CHRNB1;FGF11     |
| 8054297a      | 1.16E-05 | 1.34     | up   | 1.85     | up   | 1.49     | up   | 1.53     | down | CHST10           |
| 7958202a      | 1.24E-08 | 2.38     | down | 2.37     | down | 2.40     | down | 2.88     | up   | CHST11           |
| 8131135a      | 7.25E-06 | 1.06     | up   | 1.29     | up   | 1.12     | up   | 1.11     | down | CHST12           |
| 7936856a      | 5.86E-08 | 1.29     | down | 1.44     | down | 1.53     | down | 1.85     | up   | CHST15           |
| 8083214a      | 3.25E-12 | 1.06     | up   | 4.24     | up   | 1.07     | down | 1.30     | down | CHST2            |
| 8022666a      | 1.11E-05 | 1.19     | up   | 1.13     | down | 1.13     | up   | 1.02     | down | CHST9            |
| 8002266a      | 3.03E-06 | 1.05     | up   | 1.37     | down | 1.04     | up   | 1.10     | up   | CHTF8;HAS3       |
| 8043585a      | 4.78E-07 | 1.26     | up   | 1.09     | up   | 1.17     | up   | 1.04     | down | CIAO1            |
| 8020211a      | 6.98E-05 | 1.00     | down | 1.18     | up   | 1.00     | down | 1.18     | down | CIDEA            |
| 8056829a      | 1.82E-06 | 1.23     | up   | 1.02     | down | 1.21     | up   | 1.39     | down | CIR1             |
| 7981427a      | 7.49E-06 | 1.43     | down | 1.38     | up   | 2.55     | down | 1.42     | down | CKB              |
| 7983256a      | 3.00E-07 | 1.28     | down | 1.64     | up   | 1.92     | up   | 6.12     | down | CKMT1A;CKMT1B    |
| 8054888a      | 3.33E-05 | 1.05     | up   | 1.26     | down | 1.08     | up   | 1.11     | up   | CLASP1           |
| 7902702a      | 4.82E-05 | 1.25     | up   | 1.16     | down | 1.43     | up   | 2.14     | up   | CLCA2            |
| 8165974a      | 3.75E-05 | 1.30     | up   | 1.53     | up   | 1.66     | up   | 1.46     | down | CLCN4            |
| 8167603a      | 4.21E-05 | 1.02     | up   | 1.43     | down | 1.04     | up   | 1.33     | up   | CLCN5            |
| 8092726a      | 3.90E-05 | 1.62     | down | 2.50     | up   | 1.48     | down | 1.76     | down | CLDN1            |

| Transcript ID | Arsenic  |          |      | Chromium |      | Nickel   |      | Vanadium |      | Gene Symbol  |
|---------------|----------|----------|------|----------|------|----------|------|----------|------|--------------|
|               | p-value  | $\Delta$ | Reg  | $\Delta$ | Reg  | $\Delta$ | Reg  | $\Delta$ | Reg  |              |
| 8083887a      | 1.50E-05 | 1.02     | up   | 1.03     | up   | 1.54     | up   | 1.42     | down | CLDN11       |
| 8141708a      | 2.43E-05 | 1.20     | up   | 1.02     | up   | 1.23     | up   | 1.12     | up   | CLDN15       |
| 7998898a      | 1.56E-05 | 1.01     | down | 1.35     | down | 1.03     | down | 1.17     | up   | CLDN6        |
| 8079305a      | 1.00E-05 | 1.01     | down | 1.38     | down | 1.05     | up   | 1.04     | down | CLEC3B       |
| 8179827a      | 7.01E-07 | 1.25     | up   | 1.10     | down | 1.28     | up   | 1.14     | up   | CLIC1        |
| 8165334a      | 1.48E-05 | 1.32     | up   | 2.00     | up   | 1.12     | down | 2.41     | down | CLIC3        |
| 8133459a      | 7.28E-06 | 1.27     | up   | 1.04     | up   | 1.51     | up   | 1.02     | down | CLIP2        |
| 7981142a      | 5.19E-05 | 1.43     | up   | 1.76     | down | 1.01     | down | 1.55     | up   | CLMN         |
| 7969488a      | 1.72E-05 | 1.10     | down | 1.58     | down | 1.24     | down | 1.52     | up   | CLN5         |
| 8144267a      | 3.62E-05 | 1.03     | down | 1.42     | down | 1.12     | down | 1.13     | up   | CLN8         |
| 8144279a      | 1.31E-06 | 1.25     | down | 1.52     | down | 1.23     | down | 1.50     | up   | CLN8         |
| 8100428a      | 1.12E-05 | 1.14     | down | 1.48     | down | 1.32     | down | 1.15     | up   | CLOCK        |
| 8110803a      | 5.38E-06 | 1.44     | up   | 1.45     | up   | 1.48     | up   | 1.29     | down | CLPTM1L      |
| 7989735a      | 1.11E-05 | 1.01     | up   | 1.08     | up   | 1.02     | down | 1.41     | down | CLPX         |
| 8149927a      | 1.78E-05 | 1.11     | up   | 2.06     | down | 1.27     | up   | 1.26     | up   | CLU          |
| 7997427a      | 5.49E-06 | 1.42     | up   | 1.40     | up   | 1.66     | up   | 1.31     | down | CMIP         |
| 7966089a      | 2.19E-06 | 1.01     | up   | 1.43     | down | 1.09     | down | 1.06     | up   | CMKLR1       |
| 8050102a      | 1.92E-05 | 1.03     | up   | 1.04     | up   | 1.29     | up   | 1.04     | down | CMPK2        |
| 7996290a      | 1.53E-07 | 1.04     | up   | 1.39     | down | 1.08     | up   | 1.52     | up   | CMTM1;CKLF   |
| 7996318a      | 3.95E-07 | 1.14     | up   | 1.59     | down | 1.43     | up   | 1.42     | up   | CMTM3        |
| 8021727a      | 4.76E-06 | 1.15     | up   | 1.28     | up   | 1.06     | up   | 1.50     | down | CNDP2        |
| 8043782a      | 3.13E-06 | 1.12     | down | 1.20     | up   | 1.14     | down | 1.18     | up   | CNGA3        |
| 7941587a      | 2.52E-05 | 1.04     | down | 1.15     | up   | 1.19     | up   | 1.86     | up   | CNIH2        |
| 7910022a      | 5.33E-05 | 1.08     | down | 1.28     | up   | 1.07     | down | 1.35     | up   | CNIH3        |
| 8166355a      | 2.91E-06 | 1.14     | down | 2.76     | up   | 1.13     | down | 1.16     | down | CNKSR2       |
| 7917885a      | 1.05E-09 | 1.06     | down | 1.06     | down | 1.34     | down | 1.20     | up   | CNN3         |
| 7929732a      | 2.47E-08 | 1.45     | down | 3.04     | up   | 1.94     | down | 1.97     | down | CNNM1        |
| 8043666a      | 1.22E-05 | 1.10     | up   | 1.39     | up   | 1.21     | up   | 1.21     | down | CNNM3        |
| 8043657a      | 1.61E-05 | 1.47     | up   | 1.24     | up   | 1.36     | up   | 1.00     | up   | CNNM4        |
| 8143088a      | 7.70E-05 | 1.10     | up   | 1.31     | up   | 1.07     | up   | 1.17     | down | CNOT4        |
| 8007188a      | 2.57E-08 | 1.19     | up   | 1.48     | up   | 1.24     | up   | 1.61     | down | CNP          |
| 8119609a      | 7.40E-05 | 1.16     | up   | 1.05     | up   | 1.37     | up   | 1.06     | down | CNPY3        |
| 8052735a      | 5.30E-06 | 1.52     | up   | 1.02     | down | 1.31     | up   | 1.19     | up   | CNRIP1       |
| 7954899a      | 1.15E-05 | 1.03     | down | 1.13     | up   | 1.04     | down | 1.22     | down | CNTN1        |
| 8007272a      | 6.81E-07 | 1.16     | up   | 1.55     | up   | 1.14     | up   | 1.78     | down | COASY        |
| 8056343a      | 2.36E-05 | 3.31     | up   | 2.34     | up   | 1.37     | up   | 1.03     | down | COBLL1       |
| 8000263a      | 1.26E-05 | 1.35     | up   | 1.14     | up   | 1.25     | up   | 1.10     | up   | COG7         |
| 8127563a      | 2.06E-06 | 1.21     | down | 2.21     | up   | 2.10     | down | 1.49     | down | COL12A1      |
| 8069208a      | 6.96E-08 | 1.09     | up   | 1.46     | up   | 1.48     | up   | 1.16     | down | COL18A1      |
| 7972750a      | 1.08E-05 | 1.52     | down | 2.27     | down | 1.56     | down | 1.22     | up   | COL4A1       |
| 7970033a      | 2.66E-05 | 1.63     | down | 1.52     | down | 1.37     | down | 1.23     | up   | COL4A2;STK24 |
| 8112687a      | 2.96E-07 | 1.02     | down | 1.21     | down | 1.12     | down | 1.72     | up   | COL4A3BP     |
| 8169294a      | 6.26E-06 | 1.09     | up   | 1.50     | down | 1.25     | down | 1.56     | up   | COL4A5       |
| 8159142a      | 3.19E-07 | 1.23     | down | 1.78     | down | 1.01     | up   | 1.42     | up   | COL5A1       |
| 8057620a      | 4.14E-14 | 2.68     | up   | 18.80    | down | 3.32     | up   | 8.27     | up   | COL5A2       |
| 8081235a      | 2.94E-05 | 1.52     | down | 2.39     | down | 2.58     | down | 1.29     | up   | COL8A1       |
| 8042207a      | 2.46E-05 | 1.11     | up   | 1.38     | down | 1.09     | up   | 1.14     | up   | COMMD1       |
| 7926596a      | 1.33E-08 | 1.34     | down | 1.70     | down | 1.88     | down | 1.10     | up   | COMMD3;BMI1  |
| 8100145a      | 6.48E-05 | 1.15     | up   | 1.43     | down | 1.09     | down | 1.09     | up   | COMMD8       |
| 7947531a      | 1.74E-05 | 1.30     | up   | 1.32     | up   | 1.22     | up   | 1.18     | down | COMMD9       |
| 8071289a      | 7.38E-05 | 1.38     | up   | 1.23     | up   | 1.33     | up   | 1.17     | up   | COMT         |
| 8091048a      | 4.59E-07 | 1.13     | up   | 1.27     | up   | 1.12     | up   | 1.41     | down | COPB2        |
| 8013094a      | 5.05E-05 | 1.04     | up   | 1.17     | up   | 1.03     | up   | 1.09     | down | COPS3        |

| Transcript ID | p-value  | Arsenic |      | Chromium |      | Nickel |      | Vanadium |      | Gene Symbol      |
|---------------|----------|---------|------|----------|------|--------|------|----------|------|------------------|
|               |          | Δ       | Reg  | Δ        | Reg  | Δ      | Reg  | Δ        | Reg  |                  |
| 8049088a      | 3.11E-05 | 1.23    | up   | 1.05     | up   | 1.30   | up   | 1.07     | down | COPS7B           |
| 8047217a      | 2.77E-05 | 1.33    | up   | 1.07     | up   | 1.20   | up   | 1.08     | down | COQ10B           |
| 7993608a      | 6.47E-05 | 1.20    | up   | 1.07     | down | 1.19   | up   | 1.02     | up   | COQ7             |
| 7996041a      | 6.74E-06 | 1.14    | up   | 1.34     | down | 1.09   | up   | 1.23     | up   | COQ9             |
| 8162744a      | 1.54E-05 | 1.03    | up   | 1.45     | down | 1.04   | up   | 2.06     | down | CORO2A           |
| 7984475a      | 7.37E-08 | 1.20    | down | 2.65     | down | 1.77   | down | 2.73     | up   | CORO2B           |
| 8003171a      | 2.78E-05 | 1.39    | up   | 1.31     | up   | 1.47   | up   | 1.10     | down | COTL1            |
| 8005089a      | 8.06E-08 | 1.23    | up   | 1.43     | up   | 1.13   | up   | 1.49     | down | COX10            |
| 7935647a      | 3.59E-07 | 1.16    | down | 1.40     | up   | 1.27   | down | 1.63     | down | COX15            |
| 7968972a      | 5.64E-06 | 1.25    | up   | 1.35     | down | 1.22   | up   | 1.05     | up   | COX17            |
| 8100893a      | 2.05E-05 | 1.08    | down | 1.29     | down | 1.10   | down | 1.27     | up   | COX18            |
| 7997702a      | 3.07E-07 | 1.27    | up   | 1.16     | up   | 1.47   | up   | 1.16     | down | COX411           |
| 8003217a      | 4.34E-09 | 1.62    | up   | 1.43     | up   | 1.76   | up   | 1.26     | down | COX4NB           |
| 7990436a      | 5.76E-05 | 1.01    | up   | 1.19     | down | 1.10   | up   | 1.06     | down | COX5A            |
| 8051777a      | 1.03E-06 | 1.15    | up   | 1.02     | up   | 1.19   | up   | 1.16     | down | COX7A2L          |
| 8094169a      | 1.37E-09 | 1.19    | up   | 2.58     | down | 1.13   | down | 2.29     | up   | CPEB2            |
| 7935011a      | 4.46E-06 | 1.32    | down | 1.16     | down | 1.66   | down | 1.04     | down | CPEB3            |
| 7935679a      | 4.85E-09 | 1.30    | down | 1.16     | up   | 1.18   | down | 1.18     | up   | CPN1             |
| 7995976a      | 1.81E-08 | 1.03    | up   | 2.04     | down | 1.40   | up   | 1.57     | up   | CPNE2            |
| 7999553a      | 4.46E-05 | 1.56    | up   | 1.41     | up   | 1.61   | up   | 1.92     | down | CPPED1           |
| 8040142a      | 5.51E-06 | 1.15    | up   | 1.28     | down | 1.10   | up   | 1.33     | up   | CPSF3            |
| 8134599a      | 2.22E-05 | 1.24    | up   | 1.24     | up   | 1.12   | up   | 1.11     | down | CPSF4            |
| 8138805a      | 9.57E-05 | 2.09    | up   | 1.14     | down | 2.27   | up   | 1.17     | down | CPVL             |
| 7921099a      | 7.18E-05 | 1.12    | down | 1.13     | down | 1.51   | down | 1.18     | up   | CRABP2           |
| 8047839a      | 4.16E-05 | 1.06    | up   | 1.20     | down | 1.05   | up   | 1.02     | down | CREB1            |
| 8143188a      | 1.50E-05 | 1.00    | up   | 1.06     | down | 1.35   | down | 1.37     | up   | CREB3L2          |
| 8131996a      | 5.17E-05 | 1.42    | down | 1.38     | down | 2.18   | down | 1.50     | up   | CREB5            |
| 7999044a      | 4.12E-05 | 1.07    | up   | 1.13     | down | 1.28   | down | 1.25     | up   | CREBBP           |
| 7977397a      | 1.36E-05 | 1.12    | up   | 1.82     | down | 1.33   | up   | 1.23     | up   | CRIP2            |
| 7997642a      | 9.50E-09 | 1.53    | down | 4.40     | down | 1.03   | down | 4.26     | up   | CRISPLD2         |
| 8006850a      | 6.55E-08 | 1.03    | up   | 1.43     | up   | 1.03   | up   | 1.71     | down | CRKRS            |
| 8035506a      | 1.39E-05 | 1.12    | up   | 1.18     | up   | 1.44   | up   | 1.11     | down | CRLF1            |
| 8014037a      | 9.71E-07 | 1.02    | down | 1.26     | up   | 1.05   | up   | 1.62     | down | CRLF3            |
| 8060839a      | 5.31E-07 | 1.62    | down | 1.29     | up   | 1.70   | down | 1.10     | down | CRLS1            |
| 8065256a      | 2.65E-07 | 1.71    | down | 1.13     | up   | 1.65   | down | 1.18     | down | CRNKL1           |
| 8029978a      | 8.16E-05 | 1.03    | down | 1.06     | up   | 1.02   | down | 1.22     | up   | CRX              |
| 8072009a      | 6.62E-05 | 1.04    | up   | 1.22     | up   | 1.06   | down | 1.28     | down | CRYBB2P1         |
| 8081171a      | 8.36E-05 | 1.19    | down | 1.07     | down | 2.12   | down | 1.10     | up   | CRYBG3;MINA      |
| 7917037a      | 2.96E-07 | 1.03    | up   | 1.28     | down | 1.44   | down | 2.13     | up   | CRYZ             |
| 7964064a      | 1.15E-06 | 1.19    | up   | 1.19     | up   | 1.21   | up   | 1.12     | down | CS               |
| 7961230a      | 4.85E-06 | 1.11    | down | 1.35     | up   | 1.08   | up   | 1.10     | down | CSDA             |
| 7984871a      | 9.53E-06 | 1.19    | up   | 1.07     | down | 1.22   | up   | 1.27     | down | CSK              |
| 8019463a      | 9.58E-10 | 1.22    | up   | 1.20     | down | 1.27   | up   | 1.03     | down | CSNK1D           |
| 8064351a      | 2.94E-07 | 1.47    | down | 1.14     | up   | 1.66   | down | 1.18     | down | CSNK2A1;CSNK2A1P |
| 7946655a      | 4.46E-08 | 1.46    | down | 1.17     | up   | 1.84   | down | 1.07     | down | CSNK2A1P         |
| 7923378a      | 7.64E-09 | 1.15    | down | 1.31     | down | 1.43   | down | 1.82     | up   | CSR1             |
| 8061138a      | 6.96E-08 | 1.98    | down | 1.17     | down | 2.43   | down | 1.16     | up   | CSR1BP           |
| 8065416a      | 7.46E-06 | 1.25    | down | 1.12     | up   | 1.33   | down | 1.09     | up   | CST2             |
| 8065403a      | 7.99E-06 | 1.56    | down | 1.03     | down | 1.42   | down | 1.15     | up   | CST3             |
| 7947396a      | 1.91E-05 | 1.05    | up   | 1.13     | up   | 1.07   | down | 1.36     | down | CSTF3            |
| 8136979a      | 5.89E-05 | 1.14    | down | 1.21     | down | 1.25   | down | 1.04     | up   | CTAGE4;CTAGE6    |
| 7974090a      | 7.20E-07 | 1.15    | up   | 1.49     | down | 1.15   | up   | 1.10     | up   | CTAGE5           |
| 8143601a      | 2.84E-05 | 1.05    | down | 1.27     | down | 1.17   | down | 1.03     | up   | CTAGE6;CTAGE4    |



| Transcript ID | p-value  | Arsenic  |      | Chromium |      | Nickel   |      | Vanadium |      | Gene Symbol    |
|---------------|----------|----------|------|----------|------|----------|------|----------|------|----------------|
|               |          | $\Delta$ | Reg  | $\Delta$ | Reg  | $\Delta$ | Reg  | $\Delta$ | Reg  |                |
| 8021884a      | 2.08E-05 | 1.07     | up   | 1.24     | up   | 1.11     | up   | 1.19     | down | CTDP1          |
| 7983335a      | 4.21E-05 | 1.04     | down | 1.48     | down | 1.01     | up   | 1.16     | down | CTDSPL2        |
| 7994961a      | 2.89E-06 | 1.35     | up   | 1.01     | up   | 1.08     | up   | 1.00     | up   | CTF1           |
| 7902290a      | 9.00E-05 | 1.12     | up   | 1.48     | up   | 1.70     | down | 1.15     | down | CTH            |
| 8163063a      | 4.25E-05 | 1.46     | down | 1.05     | up   | 1.51     | down | 1.13     | down | CTNNAL1        |
| 7938422a      | 7.32E-05 | 1.36     | up   | 1.23     | up   | 1.10     | up   | 1.11     | down | CTR9           |
| 7898167a      | 3.82E-05 | 1.04     | down | 1.27     | up   | 1.03     | down | 1.15     | up   | CTRC           |
| 7950906a      | 9.66E-05 | 1.39     | up   | 1.40     | up   | 1.83     | down | 1.35     | down | CTSC           |
| 7945663a      | 8.10E-09 | 1.06     | down | 3.17     | down | 1.08     | down | 1.33     | up   | CTSD;LOC402778 |
| 7949650a      | 3.02E-05 | 1.58     | down | 1.12     | down | 1.75     | down | 1.12     | up   | CTSF           |
| 8156228a      | 1.56E-05 | 1.43     | up   | 1.35     | up   | 1.03     | up   | 1.45     | down | CTSL1          |
| 8156240a      | 2.72E-06 | 1.09     | up   | 1.13     | up   | 1.03     | up   | 1.24     | down | CTSL3          |
| 7919800a      | 2.86E-08 | 1.11     | up   | 1.85     | down | 1.08     | up   | 1.11     | up   | CTSS           |
| 7904018a      | 9.04E-07 | 1.19     | up   | 1.01     | up   | 1.04     | down | 1.21     | down | CTTNBP2NL      |
| 7997810a      | 1.57E-05 | 1.32     | up   | 1.38     | up   | 1.49     | up   | 1.05     | up   | CTU2           |
| 8016878a      | 7.86E-06 | 1.21     | up   | 1.14     | down | 1.11     | up   | 1.32     | up   | CUEDC1         |
| 7947894a      | 2.16E-07 | 1.12     | up   | 1.23     | up   | 1.06     | up   | 1.23     | down | CUGBP1         |
| 7943580a      | 9.23E-07 | 1.09     | down | 1.53     | up   | 1.13     | down | 1.32     | down | CUL5           |
| 8126486a      | 6.11E-05 | 1.06     | up   | 1.18     | down | 1.25     | up   | 1.49     | up   | CUL7           |
| 8125752a      | 1.03E-07 | 1.16     | up   | 1.13     | down | 1.22     | up   | 1.38     | up   | CUTA           |
| 7929768a      | 2.45E-06 | 1.05     | down | 1.34     | up   | 1.12     | down | 1.68     | down | CUTC           |
| 7936798a      | 6.83E-07 | 1.41     | down | 1.56     | down | 1.15     | down | 2.11     | up   | CUZD1          |
| 7951068a      | 7.20E-07 | 1.29     | down | 1.46     | up   | 1.29     | down | 1.12     | down | CWC15          |
| 8057441a      | 7.48E-05 | 1.18     | up   | 1.16     | up   | 1.08     | up   | 1.16     | down | CWC22          |
| 8095005a      | 3.53E-05 | 1.11     | up   | 1.28     | up   | 1.09     | up   | 1.47     | up   | CWH43          |
| 8011713a      | 1.07E-05 | 1.44     | up   | 1.78     | up   | 2.33     | up   | 1.57     | down | CXCL16         |
| 8049471a      | 1.93E-06 | 2.08     | down | 1.28     | down | 2.25     | down | 1.25     | up   | CXCR7          |
| 8166230a      | 9.20E-11 | 1.06     | down | 1.83     | up   | 1.25     | down | 1.41     | down | CXorf15        |
| 8170213a      | 3.19E-08 | 1.13     | down | 1.22     | down | 1.04     | down | 1.26     | up   | CXorf19        |
| 8167198a      | 5.99E-05 | 1.09     | up   | 1.38     | up   | 1.09     | up   | 1.06     | up   | CXorf25        |
| 8168447a      | 7.20E-05 | 1.30     | up   | 1.23     | down | 1.07     | down | 1.43     | down | CXorf26        |
| 8172110a      | 1.98E-09 | 1.10     | down | 1.55     | down | 1.59     | down | 1.53     | up   | CXorf38        |
| 8175642a      | 1.78E-05 | 1.15     | down | 1.73     | down | 1.21     | down | 1.30     | up   | CXorf40B       |
| 8174761a      | 4.34E-05 | 1.19     | up   | 1.19     | down | 1.46     | up   | 1.36     | down | CXorf42        |
| 8175524a      | 9.49E-07 | 1.05     | up   | 1.27     | down | 1.02     | up   | 1.03     | down | CXorf66        |
| 8004694a      | 9.24E-09 | 1.49     | up   | 1.82     | up   | 1.31     | up   | 1.49     | down | CYB5D1         |
| 8003322a      | 8.36E-05 | 1.48     | up   | 1.56     | up   | 1.90     | up   | 1.52     | down | CYBA           |
| 8018754a      | 1.58E-05 | 1.41     | down | 1.03     | down | 2.08     | down | 1.07     | down | CYGB           |
| 7995552a      | 6.61E-07 | 1.12     | up   | 1.50     | down | 1.09     | up   | 1.73     | up   | CYLD           |
| 8176698a      | 4.34E-09 | 1.97     | down | 6.49     | down | 1.71     | up   | 8.09     | up   | CYorf15A       |
| 8176709a      | 6.71E-08 | 1.55     | down | 4.75     | down | 1.59     | up   | 3.55     | up   | CYorf15B       |
| 8051583a      | 1.88E-08 | 7.07     | down | 4.62     | down | 4.93     | down | 11.24    | up   | CYP1B1         |
| 8048432a      | 5.07E-08 | 1.40     | up   | 1.31     | down | 1.60     | up   | 1.44     | down | CYP27A1        |
| 8054967a      | 2.89E-05 | 1.11     | up   | 1.98     | down | 1.33     | up   | 1.55     | up   | CYP27C1        |
| 7946742a      | 1.33E-05 | 1.48     | down | 3.53     | down | 1.09     | down | 2.18     | up   | CYP2R1         |
| 8096744a      | 4.49E-06 | 1.01     | up   | 1.30     | down | 1.58     | down | 1.28     | up   | CYP2U1         |
| 8026456a      | 9.31E-05 | 1.08     | down | 1.03     | up   | 1.05     | down | 1.35     | up   | CYP4F3         |
| 8018922a      | 6.65E-10 | 1.28     | up   | 1.18     | down | 1.42     | up   | 1.02     | down | CYTH1          |
| 8005661a      | 7.28E-05 | 1.07     | up   | 1.53     | down | 1.18     | up   | 1.12     | down | CYTSB          |
| 7974697a      | 2.33E-05 | 1.04     | up   | 1.80     | down | 1.02     | up   | 1.34     | up   | DAAM1          |
| 7974689a      | 1.62E-09 | 1.68     | down | 1.54     | down | 1.86     | down | 1.94     | up   | DACT1          |
| 8087236a      | 7.79E-06 | 1.27     | down | 1.11     | down | 1.20     | down | 1.49     | up   | DALRD3;WDR6    |
| 7906041a      | 9.17E-05 | 1.23     | down | 1.07     | down | 1.45     | down | 1.11     | up   | DAP3           |

| Transcript ID | p-value  | Arsenic  |      | Chromium |      | Nickel   |      | Vanadium |      | Gene Symbol        |
|---------------|----------|----------|------|----------|------|----------|------|----------|------|--------------------|
|               |          | $\Delta$ | Reg  | $\Delta$ | Reg  | $\Delta$ | Reg  | $\Delta$ | Reg  |                    |
| 8180179a      | 2.80E-08 | 1.42     | up   | 1.02     | down | 1.33     | up   | 1.25     | up   | DAXX               |
| 8024282a      | 2.68E-08 | 1.08     | down | 1.17     | up   | 1.06     | up   | 1.35     | down | DAZAP1             |
| 8007651a      | 9.56E-09 | 1.01     | up   | 1.37     | up   | 1.08     | up   | 1.80     | down | DBF4B              |
| 8007673a      | 7.94E-07 | 1.08     | down | 1.47     | up   | 1.02     | down | 1.47     | down | DBF4B              |
| 8044804a      | 3.18E-06 | 1.31     | up   | 1.05     | down | 1.40     | up   | 1.01     | up   | DBI                |
| 8003560a      | 3.91E-06 | 1.18     | up   | 1.19     | up   | 1.33     | up   | 1.12     | down | DBNDD1             |
| 8090960a      | 6.32E-05 | 1.23     | up   | 1.33     | up   | 1.27     | up   | 1.29     | down | DBR1               |
| 7973545a      | 4.67E-05 | 1.22     | up   | 1.35     | down | 1.07     | up   | 1.09     | up   | DCAF11             |
| 8046318a      | 9.21E-05 | 1.24     | up   | 1.09     | up   | 1.26     | up   | 1.00     | down | DCAF17             |
| 8016159a      | 9.95E-08 | 1.10     | up   | 2.03     | up   | 1.19     | up   | 1.71     | down | DCAKD              |
| 8121685a      | 7.17E-06 | 1.22     | down | 1.86     | down | 1.07     | down | 1.33     | up   | DCBLD1             |
| 8089082a      | 3.99E-06 | 1.33     | down | 1.20     | down | 1.64     | down | 1.10     | up   | DCBLD2             |
| 8095574a      | 1.38E-07 | 1.11     | down | 1.38     | down | 1.12     | down | 1.31     | up   | DCK                |
| 8097753a      | 1.20E-06 | 1.32     | up   | 1.48     | down | 2.07     | up   | 1.23     | up   | DCLK2              |
| 7945101a      | 2.39E-07 | 1.04     | up   | 1.56     | down | 1.25     | up   | 1.31     | down | DCPS               |
| 8145660a      | 7.28E-05 | 1.08     | down | 1.56     | down | 1.15     | down | 1.08     | up   | DCTN6              |
| 8095009a      | 2.76E-06 | 1.04     | down | 1.57     | down | 1.12     | down | 1.12     | up   | DCUN1D4            |
| 7951325a      | 5.27E-05 | 1.15     | down | 1.34     | up   | 1.32     | down | 1.04     | down | DCUN1D5            |
| 8179819a      | 1.64E-09 | 1.72     | up   | 1.29     | down | 2.13     | up   | 1.31     | up   | DDAH2              |
| 7948534a      | 7.48E-05 | 1.07     | down | 1.15     | up   | 1.24     | down | 1.22     | down | DDB1               |
| 8128843a      | 6.10E-05 | 1.83     | up   | 1.34     | up   | 2.29     | up   | 1.03     | down | DDO                |
| 8179184a      | 2.12E-08 | 1.32     | up   | 1.25     | down | 1.54     | up   | 1.28     | up   | DDR1               |
| 7906878a      | 4.48E-07 | 5.20     | up   | 1.02     | up   | 2.36     | up   | 1.91     | down | DDR2               |
| 7906900a      | 5.39E-06 | 4.33     | up   | 1.05     | down | 1.88     | up   | 1.41     | down | DDR2               |
| 8064601a      | 4.59E-07 | 1.70     | down | 1.20     | up   | 1.73     | down | 1.35     | down | DDRK1              |
| 8071806a      | 3.41E-06 | 1.36     | up   | 1.05     | up   | 1.30     | up   | 1.01     | down | DDT;DDTL;LOC391322 |
| 8040386a      | 7.22E-06 | 1.11     | up   | 1.25     | down | 1.00     | down | 1.23     | up   | DDX1               |
| 7904000a      | 2.98E-07 | 1.03     | up   | 1.33     | up   | 1.13     | down | 1.38     | down | DDX20              |
| 8170027a      | 1.45E-06 | 1.16     | up   | 1.97     | down | 1.50     | down | 1.40     | up   | DDX26B             |
| 8164742a      | 5.53E-06 | 1.04     | down | 1.44     | up   | 1.08     | down | 1.47     | down | DDX31              |
| 8166876a      | 4.97E-08 | 1.26     | down | 1.15     | down | 1.30     | down | 1.14     | up   | DDX3X              |
| 8176624a      | 9.24E-09 | 2.98     | down | 23.67    | down | 2.12     | up   | 29.58    | up   | DDX3Y              |
| 7967711a      | 6.12E-05 | 1.06     | down | 1.28     | up   | 1.04     | down | 1.10     | down | DDX51              |
| 8014574a      | 3.33E-05 | 1.05     | up   | 1.33     | up   | 1.02     | up   | 1.52     | down | DDX52              |
| 8103563a      | 1.68E-06 | 1.23     | up   | 2.14     | down | 1.50     | up   | 1.31     | down | DDX60              |
| 8037144a      | 3.73E-06 | 1.03     | down | 1.37     | up   | 1.17     | down | 1.08     | up   | DEDD2              |
| 7998072a      | 8.72E-06 | 1.32     | up   | 1.19     | up   | 1.60     | up   | 1.16     | down | DEF8               |
| 8060325a      | 1.02E-05 | 1.10     | down | 1.20     | up   | 1.09     | down | 1.10     | up   | DEFB132            |
| 7910001a      | 1.68E-06 | 1.14     | down | 1.04     | down | 1.25     | down | 1.30     | up   | DEGS1              |
| 7900454a      | 1.19E-06 | 1.25     | down | 1.06     | up   | 1.34     | down | 1.00     | down | DEM1               |
| 7918487a      | 5.71E-06 | 1.22     | down | 1.67     | up   | 1.64     | down | 1.01     | down | DENND2D            |
| 8148476a      | 1.39E-07 | 1.16     | down | 2.59     | down | 1.02     | up   | 1.28     | up   | DENND3             |
| 7962151a      | 6.21E-06 | 1.16     | up   | 1.36     | down | 1.33     | up   | 1.24     | up   | DENND5B            |
| 7916898a      | 2.13E-07 | 1.11     | down | 1.25     | up   | 1.27     | down | 1.54     | down | DEPDC1             |
| 8112260a      | 2.92E-07 | 1.61     | down | 1.08     | down | 1.03     | down | 1.19     | up   | DEPDC1B            |
| 7897210a      | 9.68E-06 | 1.10     | up   | 1.46     | up   | 1.13     | up   | 1.03     | down | DFFB               |
| 8138602a      | 7.54E-05 | 1.19     | down | 1.52     | down | 1.18     | down | 1.47     | up   | DFNA5              |
| 8153939a      | 4.73E-05 | 1.28     | down | 1.05     | down | 1.05     | down | 1.54     | up   | DGAT1              |
| 7956046a      | 3.17E-07 | 1.36     | down | 1.03     | down | 1.71     | down | 1.96     | up   | DGKA               |
| 7968800a      | 3.57E-07 | 1.20     | down | 1.78     | down | 1.93     | down | 1.17     | up   | DGKH               |
| 8143154a      | 8.25E-07 | 2.17     | down | 4.09     | down | 2.40     | down | 1.20     | up   | DGKI;DGKi          |
| 7968890a      | 4.43E-06 | 1.24     | up   | 1.21     | up   | 1.22     | up   | 1.16     | down | DGKZ               |
| 8042801a      | 1.72E-08 | 1.32     | up   | 1.07     | down | 1.15     | up   | 1.03     | up   | DGUOK              |

| Transcript ID | p-value  | Arsenic |      | Chromium |      | Nickel |      | Vanadium |      | Gene Symbol           |
|---------------|----------|---------|------|----------|------|--------|------|----------|------|-----------------------|
|               |          | Δ       | Reg  | Δ        | Reg  | Δ      | Reg  | Δ        | Reg  |                       |
| 7899173a      | 2.45E-06 | 1.12    | up   | 1.38     | up   | 1.03   | down | 1.12     | up   | DHDDS                 |
| 8112902a      | 9.67E-06 | 1.03    | down | 1.26     | down | 1.10   | up   | 1.25     | up   | DHFR                  |
| 7978260a      | 2.58E-05 | 1.21    | up   | 1.64     | down | 1.08   | down | 1.35     | up   | DHRS1                 |
| 8006655a      | 4.15E-05 | 1.29    | up   | 1.25     | up   | 1.51   | up   | 1.83     | down | DHRS11                |
| 8178377a      | 5.27E-08 | 1.40    | up   | 1.25     | up   | 1.46   | up   | 1.04     | down | DHX16                 |
| 8112081a      | 2.68E-08 | 1.52    | down | 1.21     | down | 1.22   | down | 1.35     | up   | DHX29                 |
| 8011861a      | 2.43E-07 | 1.12    | up   | 1.48     | up   | 1.07   | down | 1.27     | down | DHX33                 |
| 8029918a      | 8.69E-07 | 1.02    | up   | 1.31     | up   | 1.12   | down | 1.11     | down | DHX34                 |
| 7967588a      | 2.73E-05 | 1.07    | up   | 1.44     | up   | 1.14   | up   | 1.18     | down | DHX37                 |
| 7997197a      | 4.89E-05 | 1.07    | up   | 1.18     | down | 1.13   | up   | 1.43     | up   | DHX38                 |
| 8007505a      | 2.31E-07 | 1.00    | down | 1.47     | up   | 1.05   | up   | 1.73     | down | DHX8                  |
| 8168691a      | 9.07E-05 | 3.79    | down | 2.13     | down | 1.63   | down | 1.43     | down | DIAPH2                |
| 7971866a      | 2.82E-05 | 1.30    | down | 1.66     | down | 1.31   | down | 1.14     | up   | DIAPH3                |
| 8112312a      | 9.01E-08 | 1.55    | down | 1.09     | down | 1.30   | down | 1.36     | up   | DIMT1L                |
| 7980485a      | 3.65E-07 | 1.41    | down | 1.17     | up   | 2.09   | up   | 6.74     | down | DIO2                  |
| 7931683a      | 7.86E-10 | 2.16    | down | 2.74     | up   | 1.51   | down | 2.46     | down | DIP2C                 |
| 8049097a      | 3.78E-05 | 1.23    | up   | 1.06     | up   | 1.31   | up   | 1.11     | down | DIS3L2                |
| 7927631a      | 2.06E-08 | 1.02    | down | 2.42     | up   | 1.17   | up   | 1.19     | down | DKK1                  |
| 7943827a      | 1.52E-07 | 1.20    | down | 1.47     | up   | 1.45   | down | 1.32     | down | DLAT                  |
| 8149413a      | 9.73E-05 | 1.11    | up   | 1.21     | down | 1.06   | up   | 1.01     | down | DLC1                  |
| 8012054a      | 4.13E-05 | 1.11    | up   | 1.46     | down | 1.17   | down | 1.04     | up   | DLG4                  |
| 8046373a      | 5.65E-07 | 1.64    | up   | 1.27     | down | 1.87   | up   | 1.25     | up   | DLX1                  |
| 7901247a      | 7.52E-05 | 1.01    | down | 1.22     | up   | 1.14   | up   | 1.02     | up   | DMBX1                 |
| 8171921a      | 1.12E-08 | 1.04    | down | 1.35     | up   | 1.16   | down | 1.37     | down | DMD                   |
| 8131719a      | 7.95E-05 | 1.27    | up   | 1.30     | up   | 2.20   | up   | 2.42     | down | DNAH11                |
| 8001185a      | 8.14E-07 | 1.11    | up   | 1.17     | down | 1.08   | up   | 1.50     | up   | DNAJA2                |
| 7985147a      | 1.78E-07 | 2.31    | down | 1.25     | down | 3.98   | down | 1.32     | down | DNAJA4                |
| 8154962a      | 2.67E-08 | 1.12    | up   | 1.60     | down | 1.09   | down | 1.41     | up   | DNAJB5                |
| 8137627a      | 4.73E-07 | 1.25    | down | 1.62     | up   | 1.10   | down | 1.20     | down | DNAJB6;TMEM135        |
| 7932512a      | 8.77E-07 | 1.36    | down | 1.07     | down | 1.56   | down | 1.03     | up   | DNAJC1                |
| 8046759a      | 3.53E-07 | 1.21    | up   | 1.10     | up   | 1.15   | up   | 1.27     | down | DNAJC10               |
| 7933933a      | 8.27E-07 | 1.31    | up   | 1.03     | down | 1.04   | down | 1.70     | up   | DNAJC12               |
| 7963935a      | 9.63E-05 | 1.22    | up   | 1.04     | down | 1.27   | up   | 1.01     | down | DNAJC14               |
| 8104838a      | 5.82E-05 | 1.38    | up   | 1.37     | up   | 1.36   | up   | 1.26     | down | DNAJC21               |
| 7955211a      | 2.62E-06 | 1.41    | up   | 1.09     | up   | 1.49   | up   | 1.07     | down | DNAJC22               |
| 8157203a      | 1.81E-06 | 1.10    | down | 1.35     | up   | 1.01   | up   | 1.40     | down | DNAJC25;DNAJC25-GNG10 |
| 7940891a      | 1.09E-07 | 1.33    | up   | 1.04     | down | 1.39   | up   | 1.10     | up   | DNAJC4                |
| 8015490a      | 7.64E-09 | 1.01    | down | 1.53     | up   | 1.07   | down | 2.25     | down | DNAJC7;CNP            |
| 7900159a      | 1.20E-06 | 1.71    | down | 1.42     | down | 1.67   | down | 1.19     | up   | DNAL1                 |
| 7992934a      | 9.49E-05 | 1.01    | down | 1.01     | up   | 1.11   | down | 1.37     | up   | DNASE1                |
| 8176076a      | 1.31E-07 | 1.18    | up   | 1.75     | down | 1.02   | up   | 1.68     | up   | DNASE1L1              |
| 8059580a      | 1.24E-07 | 1.35    | down | 5.59     | down | 1.73   | up   | 7.09     | up   | DNER                  |
| 7938118a      | 4.91E-05 | 1.27    | up   | 1.28     | up   | 1.15   | up   | 1.10     | down | DNHD1                 |
| 7938128a      | 2.59E-06 | 1.68    | up   | 1.18     | up   | 1.35   | up   | 1.28     | down | DNHD1                 |
| 8059222a      | 3.78E-10 | 1.40    | up   | 1.20     | up   | 1.47   | up   | 1.21     | down | DNPEP                 |
| 8063028a      | 8.78E-05 | 1.03    | up   | 1.19     | up   | 1.09   | up   | 1.28     | up   | DNTTIP1               |
| 8059413a      | 1.48E-07 | 2.82    | up   | 4.32     | down | 3.27   | up   | 1.15     | up   | DOCK10                |
| 8145365a      | 9.93E-06 | 1.19    | down | 1.73     | down | 1.11   | down | 1.51     | up   | DOCK5                 |
| 7916669a      | 7.66E-06 | 1.10    | down | 1.02     | up   | 1.36   | down | 1.39     | up   | DOCK7                 |
| 8042917a      | 2.51E-06 | 1.21    | up   | 1.31     | down | 1.11   | up   | 1.09     | up   | DOK1                  |
| 8158513a      | 2.74E-06 | 1.24    | down | 1.28     | up   | 1.11   | down | 1.40     | down | DOLPP1                |
| 8179926a      | 3.03E-05 | 1.07    | up   | 1.43     | down | 1.15   | up   | 1.40     | up   | DOM3Z                 |
| 7941243a      | 3.48E-06 | 1.07    | down | 1.26     | up   | 1.24   | down | 1.09     | down | DPF2                  |

| Transcript ID | Arsenic  |          |      | Chromium |      | Nickel   |      | Vanadium |      | Gene Symbol     |
|---------------|----------|----------|------|----------|------|----------|------|----------|------|-----------------|
|               | p-value  | $\Delta$ | Reg  | $\Delta$ | Reg  | $\Delta$ | Reg  | $\Delta$ | Reg  |                 |
| 8003700a      | 7.09E-08 | 1.32     | up   | 1.42     | up   | 1.09     | up   | 1.24     | down | DPH1;OVCA2      |
| 7900911a      | 1.81E-06 | 1.22     | up   | 1.40     | up   | 1.06     | up   | 1.25     | down | DPH2            |
| 8085660a      | 1.56E-05 | 1.36     | down | 1.36     | down | 1.33     | down | 1.03     | down | DPH3            |
| 8056222a      | 2.46E-07 | 6.50     | up   | 1.03     | down | 2.49     | up   | 1.35     | up   | DPP4            |
| 8165438a      | 5.07E-09 | 1.72     | down | 1.38     | up   | 2.15     | down | 1.58     | down | DPP7            |
| 7989806a      | 1.77E-05 | 1.07     | down | 1.46     | down | 1.06     | up   | 1.33     | down | DPP8            |
| 8138988a      | 3.38E-05 | 1.29     | down | 1.18     | up   | 1.68     | down | 1.91     | down | DPY19L2P1       |
| 8027448a      | 8.17E-08 | 1.19     | down | 1.52     | down | 1.98     | down | 1.20     | up   | DPY19L3         |
| 8147375a      | 9.89E-06 | 1.01     | down | 1.32     | down | 1.22     | up   | 1.01     | down | DPY19L4         |
| 7917912a      | 5.45E-07 | 1.10     | down | 1.98     | up   | 1.49     | down | 1.19     | up   | DPYD            |
| 8145470a      | 5.05E-07 | 1.03     | up   | 1.49     | down | 1.20     | up   | 1.79     | up   | DPYSL2          |
| 7918474a      | 7.59E-05 | 1.06     | up   | 1.24     | up   | 1.13     | down | 1.04     | up   | DRAM2;CEPT1     |
| 8005313a      | 2.85E-06 | 1.23     | up   | 1.31     | up   | 1.13     | up   | 1.34     | down | DRG2            |
| 8022711a      | 4.76E-09 | 5.42     | up   | 8.38     | up   | 1.28     | down | 8.37     | down | DSC2            |
| 8022692a      | 9.64E-10 | 8.15     | up   | 34.96    | up   | 1.94     | up   | 51.06    | down | DSC3            |
| 8121588a      | 5.70E-05 | 1.29     | up   | 1.18     | down | 1.08     | down | 1.28     | up   | DSE             |
| 8023727a      | 1.07E-05 | 6.19     | up   | 1.27     | up   | 4.45     | up   | 1.81     | up   | DSEL            |
| 8061114a      | 6.12E-10 | 1.72     | down | 1.18     | down | 1.57     | down | 1.19     | up   | DSTN            |
| 8061211a      | 4.93E-06 | 1.67     | down | 1.07     | down | 1.64     | down | 1.08     | down | DTD1            |
| 8020847a      | 4.60E-06 | 1.17     | down | 2.53     | down | 1.28     | down | 1.03     | down | DTNA            |
| 7956539a      | 9.28E-07 | 1.09     | up   | 1.02     | down | 1.58     | down | 1.19     | up   | DTX3            |
| 8077262a      | 1.43E-05 | 1.26     | up   | 1.03     | down | 1.30     | up   | 1.05     | up   | DTYMK;LOC727761 |
| 7996725a      | 4.47E-05 | 1.04     | up   | 1.32     | down | 1.02     | down | 1.28     | up   | DUS2L           |
| 8006736a      | 8.36E-05 | 1.25     | up   | 1.16     | up   | 1.01     | down | 1.41     | down | DUSP14          |
| 7961371a      | 2.57E-06 | 1.39     | down | 1.60     | down | 1.34     | down | 1.61     | up   | DUSP16          |
| 8075423a      | 2.30E-06 | 1.17     | up   | 1.36     | down | 1.37     | up   | 1.40     | up   | DUSP18;SLC35E4  |
| 8053882a      | 4.34E-06 | 1.05     | up   | 1.61     | up   | 1.08     | up   | 1.32     | down | DUSP2           |
| 8116548a      | 4.35E-08 | 1.32     | up   | 1.23     | down | 1.72     | up   | 1.04     | down | DUSP22          |
| 7906469a      | 2.70E-07 | 1.19     | down | 1.33     | up   | 1.60     | down | 1.03     | down | DUSP23          |
| 8049684a      | 6.76E-05 | 1.25     | up   | 1.13     | up   | 1.19     | up   | 1.07     | up   | DUSP28;ANKMY1   |
| 8150076a      | 4.43E-07 | 1.15     | up   | 1.66     | down | 1.16     | down | 2.95     | up   | DUSP4           |
| 7943442a      | 5.94E-06 | 1.45     | down | 1.12     | up   | 2.01     | down | 1.17     | down | DYNC2H1         |
| 7943498a      | 5.23E-05 | 1.40     | down | 1.17     | up   | 1.81     | down | 1.13     | down | DYNC2H1         |
| 8008706a      | 5.46E-11 | 1.69     | up   | 1.42     | up   | 1.27     | up   | 1.35     | down | DYNLL2          |
| 8130499a      | 3.29E-05 | 1.17     | down | 1.63     | down | 1.33     | down | 1.22     | up   | DYNLT1          |
| 8172035a      | 6.37E-08 | 1.09     | down | 1.61     | down | 1.45     | down | 1.52     | up   | DYNLT3          |
| 8068551a      | 1.57E-06 | 1.06     | up   | 1.28     | up   | 1.02     | up   | 1.31     | down | DYRK1A          |
| 7909225a      | 4.93E-05 | 1.07     | down | 1.11     | down | 1.31     | down | 1.21     | up   | DYRK3           |
| 8042637a      | 2.29E-08 | 1.62     | down | 2.92     | down | 2.20     | down | 2.31     | up   | DYSF            |
| 8050336a      | 1.06E-08 | 1.40     | up   | 1.33     | down | 1.26     | up   | 1.43     | up   | E2F6            |
| 7965094a      | 3.32E-05 | 1.02     | up   | 1.38     | down | 1.02     | down | 1.21     | up   | E2F7            |
| 8082003a      | 2.30E-05 | 1.09     | up   | 1.22     | up   | 1.29     | down | 1.89     | down | EAF2            |
| 8167305a      | 1.53E-05 | 1.06     | up   | 1.37     | down | 1.27     | up   | 1.19     | down | EBP             |
| 8084397a      | 3.39E-05 | 1.08     | up   | 1.31     | up   | 1.13     | up   | 1.08     | down | ECE2            |
| 8036602a      | 5.50E-06 | 1.37     | down | 1.10     | up   | 1.42     | down | 1.10     | down | ECH1            |
| 7926152a      | 3.03E-05 | 1.21     | up   | 1.18     | down | 1.67     | down | 1.46     | down | ECHDC3          |
| 7905220a      | 1.47E-05 | 1.04     | up   | 1.13     | up   | 1.18     | down | 2.10     | up   | ECM1            |
| 8173299a      | 1.36E-05 | 1.11     | down | 1.24     | down | 1.52     | up   | 2.60     | up   | EDA2R           |
| 7990379a      | 1.40E-06 | 1.15     | up   | 1.02     | down | 1.12     | up   | 1.37     | down | EDC3            |
| 8112980a      | 1.58E-08 | 2.23     | down | 1.71     | down | 4.31     | down | 13.10    | up   | EDIL3           |
| 8116921a      | 1.47E-05 | 1.56     | up   | 1.78     | down | 3.79     | up   | 1.16     | down | EDN1            |
| 7942914a      | 8.97E-05 | 1.13     | down | 1.11     | up   | 1.23     | down | 1.14     | down | EED             |
| 8153457a      | 2.95E-09 | 1.29     | down | 1.13     | down | 1.39     | down | 1.24     | up   | EEF1D           |

| Transcript ID | Arsenic  |          |      | Chromium |      | Nickel   |      | Vanadium |      | Gene Symbol     |
|---------------|----------|----------|------|----------|------|----------|------|----------|------|-----------------|
|               | p-value  | $\Delta$ | Reg  | $\Delta$ | Reg  | $\Delta$ | Reg  | $\Delta$ | Reg  |                 |
| 8008995a      | 3.13E-05 | 1.09     | up   | 1.27     | down | 1.08     | up   | 1.08     | up   | EFCAB3          |
| 7960365a      | 1.93E-06 | 1.40     | down | 2.22     | up   | 1.47     | down | 2.22     | down | EFCAB4B         |
| 7960370a      | 2.73E-08 | 1.03     | down | 2.08     | up   | 1.21     | down | 1.96     | down | EFCAB4B         |
| 8113433a      | 8.66E-06 | 1.24     | down | 1.44     | up   | 8.29     | down | 1.27     | down | EFNA5           |
| 8040587a      | 6.56E-05 | 1.38     | up   | 1.11     | up   | 1.28     | up   | 1.50     | down | EFR3B           |
| 8016099a      | 5.75E-07 | 1.01     | up   | 1.40     | up   | 1.03     | down | 1.38     | down | EFTUD2          |
| 8159354a      | 1.12E-05 | 1.04     | up   | 1.34     | up   | 1.19     | up   | 1.16     | down | EGFL7           |
| 8105013a      | 3.49E-08 | 1.34     | up   | 1.18     | up   | 1.30     | up   | 1.19     | down | EGFLAM          |
| 8041225a      | 1.07E-05 | 1.71     | up   | 1.08     | up   | 1.38     | up   | 1.61     | up   | EHD3            |
| 8092523a      | 4.64E-06 | 2.03     | up   | 1.11     | up   | 1.79     | up   | 1.48     | down | EHHADH          |
| 8179884a      | 3.55E-09 | 1.36     | up   | 1.21     | up   | 1.51     | up   | 1.03     | up   | EHMT2           |
| 7944978a      | 4.86E-05 | 1.02     | down | 1.19     | down | 1.09     | up   | 1.11     | down | EI24            |
| 8007141a      | 3.15E-06 | 1.03     | down | 1.09     | up   | 1.06     | down | 1.17     | down | EIF1            |
| 7912852a      | 2.67E-07 | 1.09     | down | 1.46     | up   | 1.33     | down | 1.42     | down | EIF1AX;EIF1AP1  |
| 8171747a      | 9.00E-09 | 1.02     | up   | 1.37     | up   | 1.19     | down | 1.17     | down | EIF1AX;EIF1AP1  |
| 8176719a      | 1.59E-08 | 3.00     | down | 19.76    | down | 2.16     | up   | 34.36    | up   | EIF1AY          |
| 7967473a      | 6.07E-05 | 1.01     | up   | 1.05     | down | 1.09     | up   | 1.19     | up   | EIF2B1          |
| 8166493a      | 1.95E-06 | 1.03     | up   | 1.38     | up   | 1.07     | down | 1.10     | down | EIF2S3          |
| 7939137a      | 1.77E-05 | 1.00     | down | 1.21     | up   | 1.11     | down | 1.09     | down | EIF3M           |
| 8004497a      | 1.55E-05 | 1.06     | up   | 1.11     | up   | 1.03     | up   | 1.13     | down | EIF4A1          |
| 7955646a      | 5.25E-06 | 1.06     | down | 1.28     | up   | 1.02     | down | 1.10     | down | EIF4B           |
| 8135268a      | 3.71E-06 | 1.22     | down | 1.31     | up   | 1.04     | down | 1.14     | down | EIF4B;LOC643873 |
| 8049180a      | 1.87E-05 | 1.22     | up   | 1.10     | down | 1.22     | up   | 1.01     | down | EIF4E2          |
| 7928119a      | 4.98E-08 | 1.31     | down | 1.35     | down | 1.48     | down | 1.30     | up   | EIF4EBP2        |
| 7928600a      | 6.50E-05 | 1.02     | down | 1.24     | up   | 1.08     | down | 1.23     | down | EIF5AL1         |
| 7934753a      | 2.60E-05 | 1.03     | up   | 1.14     | up   | 1.09     | down | 1.18     | down | EIF5AL1         |
| 8065868a      | 5.22E-05 | 1.14     | down | 1.11     | up   | 1.12     | down | 1.20     | up   | EIF6            |
| 8012856a      | 1.34E-08 | 1.18     | up   | 1.54     | up   | 1.12     | up   | 1.29     | down | ELAC2           |
| 7971197a      | 9.12E-07 | 1.02     | up   | 1.38     | down | 1.42     | down | 1.49     | up   | ELF1            |
| 8102817a      | 1.40E-05 | 1.07     | down | 1.61     | down | 1.04     | up   | 1.05     | up   | ELF2            |
| 8175039a      | 5.13E-06 | 1.16     | up   | 1.42     | down | 1.14     | up   | 1.01     | up   | ELF4            |
| 8172345a      | 3.43E-06 | 1.27     | up   | 1.03     | up   | 1.17     | up   | 1.06     | down | ELK1            |
| 7957665a      | 3.80E-05 | 1.27     | up   | 1.12     | down | 1.36     | up   | 1.36     | up   | ELK3            |
| 7988212a      | 3.00E-06 | 1.12     | up   | 1.18     | down | 1.37     | up   | 1.07     | down | ELL3;SERINC4    |
| 8043131a      | 1.91E-06 | 1.35     | up   | 1.14     | up   | 1.31     | up   | 1.09     | down | ELMOD3          |
| 8123920a      | 7.16E-11 | 1.65     | up   | 1.85     | up   | 1.89     | up   | 1.70     | down | ELOVL2          |
| 8127145a      | 3.77E-05 | 1.02     | up   | 1.07     | up   | 1.16     | up   | 1.05     | down | ELOVL5          |
| 8112274a      | 1.96E-08 | 1.53     | up   | 5.49     | up   | 3.49     | up   | 5.28     | down | ELOVL7          |
| 8112007a      | 2.41E-05 | 1.94     | down | 1.68     | down | 1.06     | up   | 1.09     | up   | EMB             |
| 8170850a      | 1.19E-08 | 1.17     | down | 1.62     | down | 1.27     | down | 1.19     | up   | EMD             |
| 7976698a      | 3.54E-09 | 2.12     | up   | 2.35     | down | 1.74     | up   | 1.44     | up   | EML1            |
| 8041592a      | 7.25E-06 | 1.30     | up   | 1.13     | up   | 1.14     | up   | 1.09     | down | EML4            |
| 7954090a      | 1.52E-08 | 1.01     | up   | 1.11     | down | 2.07     | down | 2.68     | up   | EMP1            |
| 7999387a      | 1.50E-06 | 1.43     | up   | 1.67     | up   | 1.17     | up   | 1.30     | down | EMP2            |
| 8030007a      | 1.13E-05 | 1.12     | down | 1.31     | down | 1.22     | down | 1.38     | up   | EMP3            |
| 7924619a      | 1.62E-08 | 1.16     | down | 1.88     | down | 1.26     | down | 1.41     | up   | ENAH            |
| 8112615a      | 2.20E-05 | 1.45     | down | 1.31     | down | 1.35     | down | 1.63     | up   | ENC1            |
| 8152522a      | 8.87E-07 | 2.17     | up   | 2.86     | down | 1.04     | up   | 3.69     | up   | ENPP2           |
| 8120061a      | 6.00E-08 | 1.04     | down | 1.94     | up   | 1.64     | down | 3.13     | down | ENPP4           |
| 8149793a      | 1.79E-06 | 1.05     | up   | 1.67     | down | 1.01     | down | 1.26     | up   | ENTPD4          |
| 8061428a      | 1.67E-05 | 1.85     | down | 1.17     | up   | 1.79     | down | 1.08     | down | ENTPD6          |
| 7929750a      | 3.51E-08 | 1.36     | down | 1.30     | up   | 1.49     | down | 1.06     | down | ENTPD7          |
| 8073345a      | 3.44E-10 | 1.24     | up   | 1.46     | down | 1.20     | up   | 1.45     | up   | EP300           |

| Transcript ID | p-value  | Arsenic |      | Chromium |      | Nickel |      | Vanadium |      | Gene Symbol   |
|---------------|----------|---------|------|----------|------|--------|------|----------|------|---------------|
|               |          | Δ       | Reg  | Δ        | Reg  | Δ      | Reg  | Δ        | Reg  |               |
| 8041781a      | 6.84E-07 | 1.57    | up   | 1.20     | down | 1.98   | up   | 1.78     | up   | EPAS1         |
| 7899534a      | 4.63E-08 | 1.00    | up   | 1.62     | up   | 1.04   | down | 1.87     | down | EPB41         |
| 8045619a      | 2.73E-08 | 1.30    | up   | 1.25     | up   | 1.28   | up   | 1.34     | down | EPC2          |
| 8041853a      | 4.61E-05 | 1.24    | up   | 1.37     | up   | 1.42   | down | 1.87     | down | EPCAM         |
| 8098439a      | 4.24E-06 | 1.28    | up   | 3.41     | up   | 2.16   | down | 2.31     | down | EPCAM         |
| 8132369a      | 5.65E-07 | 2.24    | up   | 1.14     | up   | 2.42   | up   | 1.15     | down | EPDR1         |
| 8095723a      | 4.46E-08 | 3.33    | up   | 5.15     | down | 1.43   | up   | 4.08     | up   | EPGN          |
| 8059279a      | 4.63E-08 | 1.55    | up   | 7.04     | up   | 2.47   | up   | 2.27     | down | EPHA4         |
| 7898809a      | 8.97E-05 | 1.09    | down | 1.64     | down | 1.14   | down | 1.88     | up   | EPHB2         |
| 7910111a      | 8.70E-05 | 1.38    | up   | 1.35     | down | 1.48   | up   | 1.17     | up   | EPHX1         |
| 7902957a      | 1.28E-07 | 1.13    | up   | 1.33     | up   | 1.13   | up   | 2.16     | down | EPHX4         |
| 8086141a      | 3.29E-05 | 1.46    | down | 1.21     | down | 1.58   | down | 1.21     | up   | EPM2AIP1      |
| 8005557a      | 3.72E-07 | 1.39    | up   | 1.05     | down | 1.24   | up   | 1.53     | down | EPN2          |
| 7924351a      | 3.85E-06 | 1.18    | down | 1.06     | down | 1.45   | down | 1.05     | down | EPRS          |
| 7971296a      | 4.46E-08 | 1.03    | up   | 2.20     | down | 1.12   | up   | 1.78     | up   | EPSTI1        |
| 8005994a      | 2.00E-05 | 1.16    | up   | 1.29     | up   | 1.14   | up   | 1.31     | down | ERAL1         |
| 8113250a      | 1.61E-06 | 1.35    | down | 2.29     | down | 1.01   | up   | 1.76     | up   | ERAP1         |
| 8107044a      | 3.85E-07 | 1.83    | down | 3.25     | down | 1.45   | down | 1.48     | up   | ERAP2         |
| 8054978a      | 3.17E-09 | 1.25    | up   | 1.16     | up   | 1.18   | up   | 1.12     | down | ERCC3         |
| 7993298a      | 5.82E-08 | 1.54    | up   | 1.67     | up   | 1.25   | up   | 1.39     | down | ERCC4         |
| 8173506a      | 2.41E-05 | 1.12    | up   | 1.22     | down | 1.08   | up   | 1.30     | down | ERCC6L        |
| 8112285a      | 4.26E-07 | 1.55    | down | 1.20     | down | 1.26   | down | 1.20     | up   | ERCC8         |
| 8095728a      | 2.02E-07 | 1.18    | up   | 4.67     | down | 1.43   | down | 2.63     | up   | EREG          |
| 8148985a      | 4.89E-05 | 1.19    | up   | 1.26     | down | 1.16   | up   | 1.08     | up   | ERICH1        |
| 7935692a      | 9.09E-09 | 1.25    | down | 1.12     | down | 1.38   | down | 1.27     | up   | ERLIN1        |
| 8017555a      | 1.74E-05 | 1.23    | up   | 1.16     | up   | 1.02   | down | 1.02     | down | ERN1          |
| 7925342a      | 4.93E-06 | 1.24    | up   | 1.06     | down | 1.49   | up   | 2.21     | down | ERO1LB        |
| 7971513a      | 1.61E-05 | 1.01    | down | 1.37     | down | 1.34   | down | 1.30     | up   | ESD           |
| 8065032a      | 6.02E-06 | 1.80    | down | 1.04     | up   | 2.25   | down | 1.74     | down | ESF1          |
| 8082974a      | 1.45E-06 | 1.04    | down | 1.49     | up   | 1.11   | up   | 1.71     | down | ESYT3         |
| 8037322a      | 1.09E-05 | 1.30    | down | 1.51     | down | 1.26   | down | 1.50     | up   | ETHE1         |
| 8138289a      | 3.64E-06 | 2.77    | up   | 1.93     | up   | 1.04   | up   | 1.53     | up   | ETV1          |
| 8015806a      | 2.79E-05 | 1.26    | up   | 2.11     | up   | 1.41   | up   | 1.29     | down | ETV4          |
| 8093878a      | 6.85E-05 | 1.09    | down | 1.29     | down | 1.24   | down | 1.23     | up   | EVC           |
| 8014066a      | 2.30E-06 | 1.12    | up   | 1.29     | down | 1.24   | up   | 2.59     | up   | EVI2A         |
| 8014063a      | 3.01E-05 | 2.03    | up   | 1.22     | down | 2.86   | up   | 1.53     | up   | EVI2B         |
| 8123524a      | 5.05E-07 | 1.40    | up   | 1.48     | up   | 1.58   | up   | 1.07     | up   | EXOC2         |
| 8104201a      | 1.73E-05 | 1.28    | up   | 1.19     | up   | 1.26   | up   | 1.29     | down | EXOC3         |
| 7929288a      | 1.94E-06 | 1.42    | down | 1.05     | up   | 1.45   | down | 1.69     | down | EXOC6         |
| 7935462a      | 4.16E-05 | 1.25    | down | 1.23     | up   | 1.31   | down | 1.14     | down | EXOSC1        |
| 8158714a      | 3.65E-07 | 1.05    | down | 1.54     | up   | 1.11   | down | 1.38     | down | EXOSC2        |
| 8161242a      | 1.27E-05 | 1.17    | up   | 1.26     | up   | 1.07   | up   | 1.31     | down | EXOSC3        |
| 8037023a      | 8.57E-05 | 1.11    | down | 1.20     | up   | 1.27   | down | 1.07     | down | EXOSC5        |
| 7968658a      | 3.50E-07 | 1.34    | down | 1.57     | down | 1.72   | down | 1.24     | up   | EXOSC8;FAM48A |
| 8097128a      | 2.24E-05 | 1.04    | down | 1.29     | down | 1.07   | down | 1.48     | up   | EXOSC9;CCNA2  |
| 7951545a      | 9.81E-06 | 2.02    | down | 1.87     | up   | 1.81   | down | 1.91     | down | EXPH5         |
| 7918026a      | 3.79E-05 | 1.10    | up   | 1.23     | down | 1.44   | down | 1.30     | up   | EXTL2         |
| 8151310a      | 7.77E-08 | 1.04    | up   | 5.25     | down | 3.36   | down | 4.73     | up   | EYA1          |
| 8063187a      | 3.27E-07 | 2.01    | down | 4.15     | down | 1.85   | down | 1.55     | up   | EYA2          |
| 8122150a      | 1.90E-11 | 1.24    | up   | 13.24    | down | 1.06   | down | 57.45    | up   | EYA4          |
| 8015685a      | 9.45E-06 | 1.23    | down | 1.26     | up   | 1.01   | down | 1.90     | down | EZH1          |
| 8143663a      | 5.31E-07 | 1.47    | down | 1.26     | up   | 1.19   | down | 1.19     | down | EZH2          |
| 8130505a      | 6.17E-06 | 1.12    | down | 1.14     | up   | 1.34   | down | 1.07     | down | EZR           |

| Transcript ID | p-value  | Arsenic |      | Chromium |      | Nickel |      | Vanadium |      | Gene Symbol          |
|---------------|----------|---------|------|----------|------|--------|------|----------|------|----------------------|
|               |          | Δ       | Reg  | Δ        | Reg  | Δ      | Reg  | Δ        | Reg  |                      |
| 8106393a      | 9.77E-05 | 1.43    | down | 1.07     | down | 1.18   | down | 1.73     | up   | F2R                  |
| 8112731a      | 7.70E-09 | 2.27    | down | 1.05     | down | 3.65   | down | 5.96     | up   | F2RL2                |
| 7917875a      | 4.67E-05 | 1.09    | down | 1.14     | up   | 1.91   | down | 1.34     | down | F3                   |
| 8176193a      | 3.41E-06 | 1.02    | down | 1.26     | down | 1.35   | down | 1.37     | up   | F8                   |
| 8170998a      | 1.39E-05 | 1.02    | down | 1.76     | down | 1.24   | down | 1.40     | up   | F8A1;F8A2;F8A3       |
| 8176245a      | 8.53E-06 | 1.07    | down | 1.49     | down | 1.24   | down | 1.37     | up   | F8A1;F8A2;F8A3       |
| 7985268a      | 1.99E-06 | 1.32    | up   | 1.46     | down | 1.34   | up   | 1.10     | up   | FAH                  |
| 8043564a      | 3.16E-07 | 1.42    | up   | 1.09     | up   | 1.32   | up   | 1.22     | up   | FAHD2A               |
| 8054045a      | 3.11E-07 | 1.56    | up   | 1.17     | up   | 1.55   | up   | 1.06     | down | FAHD2B;FAHD2A        |
| 7999173a      | 8.04E-05 | 1.34    | up   | 1.10     | down | 1.04   | down | 1.12     | up   | FAM100A              |
| 8130765a      | 3.99E-05 | 1.11    | up   | 1.35     | down | 1.08   | up   | 1.08     | down | FAM103A1             |
| 8018097a      | 3.55E-05 | 1.20    | up   | 1.16     | up   | 1.16   | up   | 1.07     | down | FAM104A;COG1         |
| 8005231a      | 5.01E-05 | 1.11    | up   | 1.13     | up   | 1.16   | up   | 1.23     | down | FAM106A;LOC100129396 |
| 8161727a      | 2.54E-05 | 1.01    | down | 1.37     | up   | 1.05   | down | 1.39     | down | FAM108B1             |
| 7985310a      | 2.84E-06 | 1.18    | up   | 1.02     | up   | 1.24   | up   | 1.14     | down | FAM108C1             |
| 8060370a      | 1.02E-06 | 1.30    | down | 1.20     | up   | 1.13   | down | 1.04     | down | FAM110A              |
| 8146533a      | 2.08E-07 | 1.87    | up   | 2.17     | up   | 1.39   | up   | 2.00     | down | FAM110B              |
| 7940147a      | 4.09E-05 | 1.57    | down | 1.27     | up   | 1.37   | down | 1.14     | down | FAM111B              |
| 8064557a      | 9.87E-05 | 1.29    | down | 1.07     | down | 1.38   | down | 1.26     | up   | FAM113A              |
| 8094609a      | 3.16E-06 | 1.20    | up   | 1.28     | down | 1.02   | up   | 1.43     | up   | FAM114A1             |
| 8088348a      | 9.62E-05 | 1.26    | down | 1.42     | down | 1.14   | down | 1.31     | up   | FAM116A              |
| 8047565a      | 4.82E-06 | 1.43    | up   | 1.29     | up   | 1.52   | up   | 1.12     | down | FAM117B              |
| 7945058a      | 1.88E-08 | 1.11    | up   | 1.20     | down | 1.16   | up   | 1.38     | down | FAM118B              |
| 8058486a      | 2.20E-06 | 1.49    | up   | 1.03     | down | 1.21   | up   | 1.09     | up   | FAM119A              |
| 7956631a      | 1.58E-06 | 1.25    | up   | 1.02     | up   | 1.05   | up   | 1.48     | up   | FAM119B              |
| 8156452a      | 9.36E-05 | 1.12    | down | 1.11     | up   | 1.01   | down | 1.48     | down | FAM120A              |
| 8162462a      | 2.33E-05 | 1.05    | down | 1.19     | up   | 1.07   | up   | 1.45     | down | FAM120A;C9orf129     |
| 8162466a      | 1.05E-06 | 1.03    | up   | 1.31     | up   | 1.11   | up   | 1.36     | down | FAM120AOS            |
| 8173041a      | 7.75E-07 | 1.81    | up   | 2.21     | down | 1.56   | up   | 1.41     | up   | FAM120C              |
| 8155696a      | 5.00E-05 | 1.31    | down | 1.29     | up   | 1.06   | down | 1.57     | down | FAM122A              |
| 8175269a      | 2.21E-05 | 1.41    | up   | 1.20     | down | 1.27   | up   | 1.35     | down | FAM122B              |
| 8169995a      | 2.93E-08 | 1.68    | up   | 1.37     | down | 1.83   | up   | 1.33     | down | FAM122C              |
| 7969192a      | 4.96E-06 | 1.28    | up   | 1.38     | up   | 1.22   | down | 1.72     | down | FAM124A              |
| 8157905a      | 4.70E-06 | 1.08    | down | 1.60     | up   | 1.27   | up   | 1.52     | down | FAM125B              |
| 8138553a      | 1.45E-05 | 1.03    | up   | 1.24     | down | 1.06   | up   | 1.44     | up   | FAM126A              |
| 8170009a      | 3.64E-06 | 1.08    | up   | 1.47     | down | 1.02   | down | 1.20     | up   | FAM127A              |
| 8048468a      | 3.51E-08 | 1.39    | up   | 1.07     | up   | 1.60   | up   | 1.02     | down | FAM134A              |
| 8111136a      | 1.72E-05 | 1.45    | up   | 1.80     | up   | 2.29   | up   | 1.22     | down | FAM134B              |
| 8015655a      | 3.54E-08 | 1.12    | up   | 1.52     | up   | 1.27   | up   | 1.80     | down | FAM134C              |
| 8052866a      | 9.58E-10 | 1.24    | up   | 1.17     | up   | 1.29   | up   | 1.47     | down | FAM136A              |
| 7928354a      | 7.01E-05 | 1.09    | down | 1.65     | down | 1.48   | down | 1.06     | down | FAM149B1             |
| 8149324a      | 1.11E-05 | 1.03    | up   | 1.85     | up   | 1.11   | down | 1.20     | up   | FAM167A              |
| 8046895a      | 1.00E-07 | 6.18    | up   | 2.31     | up   | 2.53   | up   | 1.98     | down | FAM171B              |
| 8113083a      | 9.58E-10 | 1.22    | down | 2.26     | down | 1.32   | down | 2.21     | up   | FAM172A              |
| 8101489a      | 3.95E-05 | 1.21    | down | 1.73     | down | 1.55   | down | 1.39     | up   | FAM175A              |
| 7973918a      | 6.80E-05 | 1.25    | up   | 1.68     | down | 1.09   | up   | 1.17     | up   | FAM177A1             |
| 8132097a      | 7.79E-06 | 1.03    | up   | 1.24     | up   | 1.13   | up   | 1.22     | down | FAM188B;INMT         |
| 8005501a      | 8.02E-07 | 1.19    | up   | 1.25     | up   | 1.02   | up   | 1.49     | down | FAM18B2              |
| 8012924a      | 1.10E-05 | 1.23    | up   | 1.40     | up   | 1.02   | down | 1.30     | down | FAM18B2              |
| 8001537a      | 2.49E-07 | 1.10    | up   | 1.52     | down | 1.21   | up   | 1.40     | up   | FAM192A              |
| 7936809a      | 2.73E-10 | 1.31    | down | 1.38     | down | 1.19   | down | 2.02     | up   | FAM24B;CUZD1         |
| 8022283a      | 8.35E-09 | 4.55    | up   | 1.01     | up   | 11.85  | up   | 1.02     | down | FAM38B               |
| 8022295a      | 4.64E-10 | 6.56    | up   | 1.06     | down | 13.12  | up   | 1.01     | down | FAM38B2              |

| Transcript ID | p-value  | Arsenic |      | Chromium |      | Nickel |      | Vanadium |      | Gene Symbol     |
|---------------|----------|---------|------|----------|------|--------|------|----------|------|-----------------|
|               |          | Δ       | Reg  | Δ        | Reg  | Δ      | Reg  | Δ        | Reg  |                 |
| 8176117a      | 3.94E-07 | 1.15    | up   | 1.62     | down | 1.01   | down | 1.18     | up   | FAM3A           |
| 8084891a      | 5.01E-05 | 1.09    | up   | 1.04     | up   | 1.54   | up   | 1.05     | up   | FAM43A          |
| 8127778a      | 3.03E-08 | 1.86    | up   | 1.07     | down | 1.34   | up   | 2.11     | up   | FAM46A          |
| 8050427a      | 1.44E-07 | 1.44    | up   | 1.04     | up   | 1.15   | up   | 2.10     | up   | FAM49A          |
| 8170906a      | 6.65E-07 | 1.07    | down | 1.53     | down | 1.10   | down | 1.24     | up   | FAM50A          |
| 8116658a      | 3.65E-05 | 1.43    | up   | 1.41     | up   | 1.26   | up   | 1.41     | down | FAM50B          |
| 8129763a      | 2.65E-06 | 1.29    | up   | 1.26     | up   | 1.49   | up   | 1.18     | down | FAM54A          |
| 8003611a      | 2.98E-08 | 1.12    | up   | 1.28     | up   | 1.00   | up   | 1.48     | down | FAM57A          |
| 8175811a      | 9.10E-06 | 1.08    | down | 1.31     | down | 1.15   | down | 1.41     | up   | FAM58A          |
| 7967879a      | 3.85E-05 | 1.04    | down | 1.31     | down | 1.18   | down | 1.46     | up   | FAM58A;FAM58B   |
| 8040632a      | 3.06E-06 | 1.17    | up   | 1.26     | up   | 1.25   | up   | 1.28     | down | FAM59B          |
| 8004167a      | 6.48E-06 | 1.15    | up   | 1.22     | up   | 1.26   | up   | 1.55     | down | FAM64A          |
| 7996571a      | 8.63E-05 | 1.03    | up   | 1.35     | down | 1.09   | up   | 1.52     | up   | FAM65A          |
| 7917728a      | 2.39E-05 | 1.42    | up   | 1.38     | down | 1.22   | down | 1.45     | up   | FAM69A          |
| 8174767a      | 2.44E-05 | 3.66    | down | 1.27     | up   | 6.62   | down | 1.36     | down | FAM70A          |
| 7957790a      | 4.35E-05 | 1.04    | down | 1.07     | down | 1.07   | up   | 1.26     | up   | FAM71C          |
| 7951093a      | 2.12E-07 | 1.21    | down | 1.42     | up   | 1.09   | down | 1.30     | down | FAM76B          |
| 7983991a      | 2.62E-08 | 1.11    | up   | 1.03     | up   | 2.07   | up   | 1.15     | down | FAM81A          |
| 8148208a      | 5.35E-05 | 1.07    | up   | 1.01     | down | 1.26   | up   | 1.28     | down | FAM91A1         |
| 8001924a      | 5.43E-08 | 1.10    | up   | 1.37     | down | 1.17   | up   | 1.27     | up   | FAM96B          |
| 8051413a      | 1.79E-07 | 1.31    | up   | 1.47     | up   | 1.04   | up   | 1.10     | down | FAM98A          |
| 7982574a      | 2.62E-05 | 1.02    | up   | 1.20     | down | 1.01   | down | 1.51     | down | FAM98B          |
| 8003503a      | 1.31E-09 | 1.30    | up   | 1.65     | up   | 1.81   | up   | 1.65     | down | FANCA;ZNF276    |
| 8118963a      | 2.40E-06 | 1.39    | up   | 1.26     | up   | 1.35   | up   | 1.01     | up   | FANCE           |
| 8056257a      | 2.08E-09 | 3.50    | up   | 3.93     | down | 1.46   | up   | 1.17     | up   | FAP             |
| 7954631a      | 2.66E-08 | 1.35    | up   | 2.95     | up   | 1.31   | up   | 6.95     | down | FAR2            |
| 8116724a      | 9.34E-09 | 1.40    | up   | 1.02     | down | 1.54   | up   | 1.13     | down | FARS2           |
| 8056693a      | 2.45E-05 | 1.36    | up   | 1.06     | up   | 1.29   | up   | 1.30     | down | FASTKD1         |
| 8047815a      | 9.50E-06 | 1.22    | up   | 1.02     | up   | 1.15   | up   | 1.27     | down | FASTKD2         |
| 8110920a      | 8.66E-06 | 1.38    | up   | 1.68     | up   | 1.35   | up   | 1.53     | down | FASTKD3         |
| 8064581a      | 8.44E-07 | 1.70    | down | 1.13     | up   | 1.94   | down | 1.20     | down | FASTKD5;UBOX5   |
| 8104079a      | 7.01E-06 | 1.14    | down | 1.51     | down | 1.02   | down | 1.25     | up   | FAT1            |
| 8097288a      | 1.66E-06 | 1.21    | up   | 2.95     | down | 1.18   | down | 1.80     | up   | FAT4            |
| 8036777a      | 5.80E-07 | 1.30    | down | 1.11     | up   | 1.44   | down | 1.07     | down | FBL             |
| 7898263a      | 4.26E-07 | 1.06    | up   | 1.67     | down | 1.29   | up   | 1.25     | up   | FBLIM1          |
| 7988467a      | 1.49E-05 | 1.02    | down | 1.94     | down | 1.90   | down | 1.08     | down | FBN1            |
| 8113800a      | 1.03E-05 | 1.19    | down | 1.61     | up   | 2.52   | down | 1.14     | up   | FBN2            |
| 7994874a      | 3.75E-05 | 1.43    | up   | 1.14     | up   | 1.33   | up   | 1.01     | up   | FBRS            |
| 7998297a      | 1.10E-06 | 1.29    | down | 1.04     | down | 1.19   | down | 1.95     | up   | FBXL16          |
| 7994967a      | 2.46E-05 | 1.19    | up   | 1.04     | up   | 1.12   | up   | 1.08     | down | FBXL19          |
| 8078461a      | 3.04E-08 | 1.35    | down | 2.15     | down | 1.30   | down | 1.86     | up   | FBXL2           |
| 8099449a      | 2.47E-08 | 1.01    | down | 1.60     | down | 1.20   | down | 1.30     | up   | FBXL5           |
| 8036676a      | 1.80E-05 | 1.01    | down | 1.26     | up   | 1.10   | down | 1.22     | up   | FBXO17;SARS2    |
| 7985053a      | 8.71E-07 | 1.02    | down | 1.52     | down | 1.11   | up   | 1.20     | down | FBXO22;FBXO22OS |
| 8003249a      | 1.88E-05 | 1.20    | up   | 1.31     | up   | 1.31   | up   | 1.18     | down | FBXO31          |
| 8152703a      | 2.12E-09 | 1.78    | up   | 3.90     | down | 3.22   | up   | 2.18     | up   | FBXO32          |
| 8048889a      | 8.89E-05 | 1.39    | up   | 1.06     | up   | 1.25   | up   | 1.14     | down | FBXO36          |
| 8105111a      | 5.35E-05 | 1.07    | up   | 1.04     | down | 1.98   | down | 1.53     | down | FBXO4           |
| 8152031a      | 1.52E-05 | 1.18    | up   | 1.25     | down | 1.38   | up   | 1.20     | up   | FBXO43          |
| 7897714a      | 2.75E-07 | 1.16    | up   | 1.31     | up   | 1.38   | up   | 1.08     | down | FBXO44          |
| 8052742a      | 2.31E-05 | 1.25    | up   | 1.19     | up   | 1.18   | up   | 1.41     | down | FBXO48          |
| 7897728a      | 5.97E-05 | 1.13    | up   | 1.24     | up   | 1.36   | up   | 1.16     | down | FBXO6           |
| 8163784a      | 1.04E-05 | 1.07    | down | 1.22     | up   | 1.01   | up   | 1.41     | down | FBXW2           |



| Transcript ID | p-value  | Arsenic |      | Chromium |      | Nickel |      | Vanadium |      | Gene Symbol           |
|---------------|----------|---------|------|----------|------|--------|------|----------|------|-----------------------|
|               |          | Δ       | Reg  | Δ        | Reg  | Δ      | Reg  | Δ        | Reg  |                       |
| 8106141a      | 1.17E-08 | 1.30    | down | 1.38     | down | 1.06   | down | 2.02     | up   | FCHO2                 |
| 8144669a      | 7.65E-06 | 1.12    | up   | 1.22     | down | 1.39   | up   | 1.02     | down | FDFT1                 |
| 7943721a      | 2.16E-07 | 1.02    | down | 1.33     | up   | 1.23   | down | 1.21     | down | FDX1                  |
| 7951654a      | 5.64E-06 | 1.02    | down | 1.76     | up   | 1.11   | up   | 1.20     | down | FDXACB1;ALG9          |
| 7984470a      | 8.08E-05 | 1.00    | up   | 1.45     | down | 1.04   | up   | 1.09     | down | FEM1B                 |
| 8064904a      | 3.02E-07 | 1.86    | down | 2.90     | up   | 1.71   | down | 2.44     | down | FERMT1                |
| 7979204a      | 5.32E-06 | 1.08    | up   | 1.47     | down | 1.01   | up   | 1.44     | up   | FERMT2                |
| 7952490a      | 1.23E-08 | 1.07    | up   | 1.06     | up   | 1.18   | up   | 4.65     | down | FEZ1                  |
| 8051427a      | 6.30E-07 | 1.38    | up   | 1.11     | up   | 1.53   | up   | 1.04     | down | FEZ2                  |
| 7954729a      | 2.03E-05 | 1.38    | down | 2.00     | down | 1.30   | up   | 1.94     | down | FGD4                  |
| 8092750a      | 9.36E-05 | 1.35    | up   | 1.08     | up   | 1.15   | up   | 1.23     | up   | FGF12                 |
| 8097256a      | 2.05E-05 | 1.29    | up   | 1.09     | down | 1.55   | up   | 1.05     | down | FGF2                  |
| 8110265a      | 4.89E-05 | 1.39    | up   | 1.15     | up   | 1.31   | up   | 1.28     | down | FGFR4                 |
| 8097829a      | 9.16E-08 | 1.93    | down | 2.22     | down | 1.29   | down | 4.44     | up   | FHDC1                 |
| 8170119a      | 3.26E-10 | 1.09    | up   | 2.79     | down | 1.23   | up   | 1.25     | up   | FHL1                  |
| 8054377a      | 1.32E-05 | 1.17    | up   | 1.18     | down | 1.27   | up   | 1.29     | up   | FHL2                  |
| 7915147a      | 4.31E-06 | 1.10    | up   | 1.16     | down | 1.07   | down | 1.31     | up   | FHL3                  |
| 8001981a      | 9.78E-09 | 1.34    | up   | 1.36     | down | 1.11   | up   | 2.11     | up   | FHOD1;SLC9A5          |
| 8056323a      | 2.64E-08 | 1.43    | up   | 1.78     | down | 1.23   | up   | 1.82     | up   | FIGN                  |
| 8138834a      | 4.21E-05 | 1.00    | down | 1.27     | down | 1.37   | down | 1.45     | up   | FKBP14                |
| 8064432a      | 1.02E-06 | 1.65    | down | 1.30     | down | 2.07   | down | 1.16     | up   | FKBP1A                |
| 8120428a      | 2.08E-08 | 1.49    | down | 1.15     | down | 1.73   | down | 1.15     | up   | FKBP1A;FKBP1C         |
| 8040530a      | 1.76E-05 | 1.23    | up   | 1.22     | down | 1.26   | up   | 1.16     | up   | FKBP1B;MFSD2B         |
| 8057045a      | 2.15E-06 | 1.72    | up   | 1.14     | down | 1.24   | down | 1.39     | up   | FKBP7                 |
| 8178749a      | 2.83E-05 | 1.30    | up   | 1.24     | up   | 1.25   | up   | 1.02     | up   | FKBPL                 |
| 7945132a      | 1.07E-06 | 1.46    | up   | 2.13     | down | 1.69   | up   | 1.08     | down | FLI1;EWSR1            |
| 8080980a      | 1.17E-05 | 1.22    | down | 1.35     | down | 1.40   | down | 1.13     | up   | FLJ10213              |
| 7973158a      | 3.05E-07 | 1.09    | up   | 1.21     | down | 1.19   | up   | 1.37     | up   | FLJ10357              |
| 8038874a      | 6.71E-05 | 1.23    | down | 1.17     | up   | 1.20   | down | 1.01     | down | FLJ30403;LOC100132800 |
| 8017704a      | 5.43E-05 | 1.36    | up   | 1.13     | down | 1.28   | up   | 1.43     | up   | FLJ32065              |
| 8010499a      | 1.41E-05 | 1.45    | up   | 1.18     | up   | 1.34   | up   | 1.05     | up   | FLJ35220              |
| 7917942a      | 8.53E-05 | 1.44    | up   | 1.98     | up   | 1.15   | down | 1.09     | down | FLJ35409              |
| 8019954a      | 5.38E-07 | 1.49    | up   | 1.02     | down | 1.84   | up   | 1.78     | down | FLJ35776              |
| 7918620a      | 7.28E-06 | 1.71    | up   | 1.18     | up   | 1.47   | up   | 1.27     | down | FLJ36116              |
| 8144228a      | 2.09E-08 | 1.73    | up   | 1.01     | down | 2.08   | up   | 1.91     | down | FLJ36840              |
| 8176026a      | 1.68E-08 | 1.12    | down | 1.54     | down | 1.18   | down | 1.48     | up   | FLNA                  |
| 8080714a      | 3.54E-08 | 1.38    | down | 1.37     | down | 1.33   | down | 1.75     | up   | FLNB                  |
| 8135990a      | 4.85E-08 | 1.02    | down | 2.23     | up   | 1.81   | down | 1.49     | down | FLNC                  |
| 8179688a      | 2.06E-07 | 1.58    | up   | 1.08     | up   | 1.76   | up   | 1.26     | up   | FLOT1                 |
| 7970763a      | 4.00E-07 | 1.58    | up   | 1.47     | up   | 2.00   | up   | 2.02     | down | FLT1                  |
| 7975799a      | 3.78E-05 | 1.40    | up   | 1.26     | down | 1.20   | up   | 1.57     | up   | FLVCR2                |
| 7992737a      | 1.78E-05 | 1.15    | up   | 1.19     | down | 1.01   | up   | 1.28     | up   | FLYWCH2               |
| 7987145a      | 5.49E-05 | 1.07    | up   | 1.86     | down | 1.30   | down | 2.29     | up   | FMN1                  |
| 7910923a      | 2.96E-08 | 1.22    | up   | 1.88     | up   | 1.03   | down | 4.27     | down | FMN2                  |
| 8007757a      | 9.80E-07 | 1.08    | down | 1.30     | up   | 1.22   | up   | 1.49     | down | FMNL1                 |
| 8170326a      | 5.60E-10 | 1.24    | down | 1.68     | down | 1.61   | down | 1.62     | up   | FMR1                  |
| 8058765a      | 9.23E-08 | 1.37    | down | 1.35     | down | 1.02   | up   | 2.15     | up   | FN1                   |
| 8010832a      | 1.09E-05 | 1.19    | up   | 1.01     | up   | 1.21   | up   | 1.11     | up   | FN3KRP                |
| 7947969a      | 9.12E-07 | 1.07    | up   | 1.22     | up   | 1.03   | down | 1.26     | down | FNBP4                 |
| 8123104a      | 1.76E-05 | 1.02    | up   | 1.35     | up   | 1.12   | up   | 1.19     | down | FNDC1                 |
| 7969060a      | 8.92E-08 | 1.02    | down | 1.44     | down | 1.41   | down | 1.34     | up   | FNDC3A                |
| 8098103a      | 1.88E-06 | 1.08    | down | 1.54     | down | 1.47   | down | 1.59     | up   | FNIP2                 |
| 7997733a      | 6.46E-06 | 1.05    | down | 1.42     | down | 1.06   | up   | 1.39     | up   | FOXC2                 |

| Transcript ID | p-value  | Arsenic  |      | Chromium |      | Nickel   |      | Vanadium |      | Gene Symbol        |
|---------------|----------|----------|------|----------|------|----------|------|----------|------|--------------------|
|               |          | $\Delta$ | Reg  | $\Delta$ | Reg  | $\Delta$ | Reg  | $\Delta$ | Reg  |                    |
| 8112592a      | 9.33E-08 | 1.07     | down | 1.01     | up   | 1.23     | down | 2.61     | up   | FOXD1              |
| 8156743a      | 2.95E-05 | 1.40     | up   | 1.25     | up   | 1.00     | up   | 1.28     | down | FOX E1             |
| 8116582a      | 2.12E-06 | 1.18     | up   | 1.33     | up   | 2.01     | up   | 1.17     | down | FOXF2              |
| 7973745a      | 1.30E-07 | 1.04     | down | 1.73     | up   | 1.01     | down | 1.13     | down | FOXG1              |
| 7915408a      | 2.15E-06 | 1.15     | up   | 1.34     | up   | 1.02     | up   | 1.09     | down | FOXJ3              |
| 7960340a      | 2.40E-05 | 1.11     | up   | 1.01     | up   | 1.38     | up   | 1.12     | down | FOX M1             |
| 7971177a      | 4.89E-05 | 1.15     | up   | 1.17     | down | 1.22     | up   | 1.00     | down | FOXO1              |
| 8088776a      | 4.16E-07 | 1.34     | down | 2.67     | down | 1.15     | down | 1.59     | up   | FOXP1              |
| 8119444a      | 3.22E-05 | 1.28     | up   | 1.26     | up   | 1.32     | up   | 1.02     | down | FOXP4              |
| 7945071a      | 3.37E-08 | 1.10     | up   | 1.15     | down | 1.13     | up   | 1.33     | down | FOXRED1            |
| 7929616a      | 6.43E-05 | 1.00     | down | 1.26     | up   | 1.01     | up   | 1.20     | down | FRAT1              |
| 8098714a      | 1.38E-05 | 1.09     | down | 1.57     | down | 1.10     | down | 1.07     | up   | FRG1               |
| 8161509a      | 2.72E-05 | 1.18     | down | 1.46     | down | 1.13     | down | 1.02     | up   | FRG1;FRG1B         |
| 8129071a      | 1.68E-05 | 2.41     | up   | 1.04     | down | 1.10     | up   | 1.00     | down | FRK                |
| 7932132a      | 3.04E-08 | 1.24     | down | 1.09     | down | 1.58     | down | 1.92     | up   | FRMD4A             |
| 7988260a      | 5.31E-05 | 1.43     | down | 1.92     | down | 1.74     | down | 1.48     | up   | FRMD5              |
| 7974316a      | 5.44E-06 | 1.07     | up   | 1.42     | down | 1.16     | down | 1.48     | up   | FRMD6              |
| 7941260a      | 5.03E-05 | 1.02     | up   | 1.29     | up   | 1.00     | up   | 1.00     | up   | FRMD8              |
| 8100251a      | 3.77E-05 | 1.19     | down | 1.48     | down | 1.24     | down | 1.09     | up   | FRYL               |
| 8023995a      | 1.28E-06 | 1.57     | down | 2.11     | down | 1.57     | down | 1.21     | up   | FSTL3              |
| 7995655a      | 1.31E-09 | 1.08     | up   | 1.45     | down | 1.04     | up   | 1.66     | up   | FTO                |
| 8167270a      | 8.14E-05 | 1.02     | down | 1.33     | down | 1.20     | down | 1.08     | up   | FTSJ1              |
| 8017437a      | 3.97E-05 | 1.23     | up   | 1.07     | up   | 1.14     | up   | 1.14     | down | FTSJ3              |
| 8158686a      | 2.41E-05 | 1.02     | up   | 1.25     | up   | 1.05     | up   | 1.35     | down | FUBP3              |
| 8172244a      | 1.86E-07 | 1.32     | up   | 1.32     | down | 1.04     | up   | 1.18     | down | FUNDC1             |
| 8171001a      | 1.43E-06 | 1.45     | down | 1.77     | down | 1.61     | down | 1.05     | up   | FUNDC2             |
| 7986092a      | 2.34E-06 | 1.08     | up   | 1.41     | down | 1.25     | up   | 1.15     | down | FURIN              |
| 8039947a      | 1.02E-05 | 1.10     | down | 1.14     | up   | 1.15     | down | 1.08     | down | FUSIP1             |
| 7943236a      | 5.08E-05 | 1.04     | down | 1.32     | up   | 1.07     | down | 1.10     | down | FUT4               |
| 7975136a      | 8.15E-07 | 1.03     | down | 1.31     | down | 1.28     | down | 1.49     | up   | FUT8               |
| 8155699a      | 1.33E-07 | 1.02     | up   | 1.43     | up   | 1.06     | down | 1.62     | down | FXN                |
| 8084146a      | 4.96E-05 | 1.07     | up   | 1.19     | up   | 1.04     | up   | 1.30     | down | FXR1               |
| 8012226a      | 3.17E-05 | 1.09     | up   | 1.20     | up   | 1.08     | down | 1.15     | down | FXR2               |
| 8027778a      | 6.23E-07 | 1.45     | down | 1.09     | up   | 1.33     | down | 1.04     | up   | FXYS5;LOC100127972 |
| 8007637a      | 3.01E-06 | 1.23     | up   | 1.19     | up   | 1.49     | up   | 1.22     | down | FZD2               |
| 8147766a      | 3.58E-07 | 1.13     | up   | 1.83     | up   | 2.03     | up   | 1.73     | down | FZD6               |
| 8047487a      | 2.98E-05 | 1.13     | down | 1.27     | down | 1.24     | up   | 1.90     | up   | FZD7               |
| 7909441a      | 2.21E-05 | 1.02     | up   | 1.73     | up   | 1.43     | down | 3.20     | up   | G0S2               |
| 8109368a      | 5.48E-06 | 1.13     | down | 1.09     | up   | 1.09     | down | 1.15     | down | G3BP1              |
| 8101043a      | 1.23E-05 | 1.04     | up   | 1.31     | down | 1.08     | down | 1.16     | up   | G3BP2              |
| 8007561a      | 3.81E-05 | 1.00     | up   | 1.31     | up   | 1.08     | up   | 1.41     | down | G6PC3              |
| 8176133a      | 4.28E-07 | 1.06     | up   | 1.48     | down | 1.05     | up   | 1.33     | up   | G6PD               |
| 8010354a      | 9.36E-05 | 1.06     | down | 1.43     | down | 1.06     | down | 1.27     | up   | GAA                |
| 8097586a      | 3.48E-05 | 1.04     | down | 1.67     | down | 1.02     | down | 1.16     | up   | GAB1               |
| 7950671a      | 5.78E-05 | 1.46     | up   | 1.19     | up   | 1.23     | down | 1.36     | down | GAB2               |
| 8176163a      | 1.31E-09 | 1.07     | up   | 2.25     | down | 1.13     | down | 1.20     | up   | GAB3               |
| 7953943a      | 1.17E-05 | 1.37     | up   | 1.04     | up   | 2.23     | up   | 1.85     | down | GABARAPL1          |
| 7997272a      | 1.92E-07 | 1.05     | up   | 1.45     | down | 1.04     | up   | 1.29     | up   | GABARAPL2          |
| 8175696a      | 2.92E-06 | 1.01     | down | 1.10     | up   | 1.16     | down | 8.38     | up   | GABRA3             |
| 8175683a      | 5.02E-05 | 1.02     | down | 2.43     | down | 1.33     | down | 1.57     | up   | GABRE              |
| 8046283a      | 4.05E-06 | 1.66     | up   | 1.39     | up   | 1.55     | up   | 1.24     | down | GAD1               |
| 7942064a      | 3.12E-10 | 1.43     | down | 1.53     | up   | 1.67     | down | 5.41     | down | GAL                |
| 7980580a      | 1.19E-05 | 1.10     | down | 2.56     | down | 2.59     | down | 1.56     | up   | GALC               |

| Transcript ID | p-value  | Arsenic |      | Chromium |      | Nickel |      | Vanadium |      | Gene Symbol       |
|---------------|----------|---------|------|----------|------|--------|------|----------|------|-------------------|
|               |          | Δ       | Reg  | Δ        | Reg  | Δ      | Reg  | Δ        | Reg  |                   |
| 8018428a      | 1.72E-05 | 1.14    | up   | 1.00     | down | 1.28   | up   | 1.02     | down | GALK1             |
| 8041542a      | 5.49E-05 | 1.54    | up   | 1.10     | up   | 1.05   | up   | 1.20     | up   | GALM              |
| 8003410a      | 2.35E-08 | 1.57    | up   | 1.35     | up   | 2.06   | up   | 1.31     | down | GALNS             |
| 8020903a      | 6.34E-06 | 1.11    | down | 1.60     | up   | 1.02   | up   | 3.10     | down | GALNT1            |
| 8109407a      | 1.39E-07 | 1.26    | up   | 2.12     | down | 1.24   | up   | 1.53     | up   | GALNT10           |
| 8109426a      | 2.32E-06 | 1.16    | up   | 2.13     | down | 1.19   | up   | 1.37     | up   | GALNT10           |
| 8045776a      | 9.88E-06 | 1.08    | down | 4.38     | up   | 1.31   | down | 1.21     | down | GALNT13           |
| 8051298a      | 6.79E-07 | 1.01    | up   | 1.61     | up   | 1.06   | up   | 2.38     | down | GALNT14           |
| 7910427a      | 6.02E-08 | 1.16    | down | 1.50     | down | 1.33   | down | 1.41     | up   | GALNT2            |
| 8045835a      | 1.30E-07 | 1.97    | up   | 2.21     | down | 1.31   | down | 3.98     | up   | GALNT5            |
| 7963313a      | 8.48E-07 | 1.36    | up   | 2.23     | up   | 1.30   | up   | 1.93     | down | GALNT6            |
| 7997414a      | 9.58E-10 | 1.50    | up   | 1.77     | up   | 1.52   | up   | 1.53     | down | GAN               |
| 8157858a      | 2.21E-05 | 1.14    | down | 1.31     | up   | 1.01   | up   | 1.55     | down | GAPVD1            |
| 8157976a      | 2.33E-07 | 1.11    | up   | 1.19     | up   | 1.34   | up   | 1.60     | down | GARNL3            |
| 8070102a      | 3.95E-06 | 1.04    | up   | 1.35     | up   | 1.11   | down | 1.26     | down | GART              |
| 7970329a      | 3.60E-07 | 2.22    | down | 1.57     | down | 2.13   | down | 1.26     | up   | GAS6              |
| 7998103a      | 5.95E-09 | 1.21    | up   | 1.60     | up   | 1.69   | up   | 1.58     | down | GAS8;LOC100130015 |
| 8090469a      | 1.37E-05 | 1.19    | up   | 1.69     | up   | 1.39   | up   | 1.18     | down | GATA2             |
| 8027169a      | 6.08E-05 | 1.16    | up   | 1.13     | up   | 1.21   | up   | 1.26     | down | GATAD2A           |
| 8075322a      | 4.27E-05 | 1.11    | down | 1.25     | down | 1.18   | down | 1.20     | up   | GATSL3;TBC1D10A   |
| 7930031a      | 7.29E-06 | 1.00    | down | 1.18     | down | 1.11   | down | 1.44     | up   | GBF1              |
| 8164833a      | 9.57E-05 | 1.05    | down | 1.16     | up   | 1.11   | down | 1.70     | down | GBGT1;RALGDS      |
| 8046003a      | 6.66E-09 | 5.94    | up   | 1.22     | up   | 2.12   | up   | 12.00    | down | GCA               |
| 8072931a      | 9.22E-05 | 1.06    | up   | 1.38     | up   | 1.24   | up   | 1.26     | down | GCAT              |
| 8116835a      | 6.62E-06 | 1.38    | up   | 1.66     | down | 1.74   | up   | 1.15     | up   | GCNT2             |
| 8112668a      | 6.12E-05 | 1.66    | up   | 1.49     | up   | 2.22   | up   | 1.30     | down | GCNT4             |
| 7922104a      | 1.94E-08 | 1.63    | up   | 1.19     | up   | 1.69   | up   | 1.24     | down | GCSH              |
| 8114778a      | 2.20E-06 | 1.32    | up   | 1.44     | up   | 1.39   | up   | 1.17     | down | GCSH              |
| 7918955a      | 2.46E-05 | 1.07    | up   | 1.26     | up   | 1.06   | down | 1.12     | down | GDAP2             |
| 7999889a      | 1.56E-05 | 1.29    | up   | 1.21     | up   | 1.13   | up   | 1.05     | down | GDE1              |
| 8170891a      | 3.99E-09 | 1.07    | down | 1.74     | down | 1.17   | down | 1.31     | up   | GDI1              |
| 8111670a      | 6.69E-10 | 1.46    | down | 2.91     | up   | 1.88   | down | 1.19     | down | GDNF              |
| 8008802a      | 2.67E-06 | 1.31    | up   | 1.28     | up   | 1.35   | up   | 1.32     | down | GDPD1             |
| 8151816a      | 8.24E-06 | 1.02    | down | 1.63     | down | 1.51   | down | 1.93     | up   | GEM               |
| 8010946a      | 3.06E-08 | 1.18    | up   | 1.49     | up   | 1.05   | up   | 1.46     | down | GEMIN4            |
| 8115410a      | 9.90E-06 | 1.17    | up   | 1.50     | up   | 1.10   | up   | 1.36     | down | GEMIN5            |
| 8083630a      | 3.86E-05 | 1.08    | up   | 1.31     | up   | 1.00   | down | 1.46     | down | GFM1              |
| 8112622a      | 3.41E-06 | 1.18    | down | 1.25     | down | 1.01   | down | 1.61     | up   | GFM2              |
| 8002082a      | 3.82E-05 | 1.08    | up   | 1.20     | down | 1.06   | up   | 1.53     | up   | GFOD2             |
| 8116418a      | 6.53E-08 | 1.05    | up   | 2.95     | down | 1.62   | up   | 1.25     | up   | GFPT2             |
| 7936494a      | 6.58E-09 | 6.34    | down | 3.67     | up   | 1.50   | down | 1.30     | down | GFRA1             |
| 8114415a      | 3.57E-05 | 1.00    | down | 1.20     | up   | 1.17   | down | 1.31     | down | GFRA3             |
| 8006638a      | 1.92E-05 | 1.07    | up   | 1.16     | up   | 1.00   | up   | 1.44     | down | GGNBP2            |
| 7910640a      | 7.53E-05 | 1.01    | down | 1.17     | down | 1.08   | up   | 1.39     | down | GGPS1             |
| 7928752a      | 1.09E-06 | 1.16    | down | 1.12     | up   | 1.26   | down | 1.14     | down | GHITM             |
| 8049199a      | 4.05E-07 | 1.12    | up   | 1.23     | up   | 1.09   | up   | 1.21     | down | GIGYF2            |
| 8061471a      | 4.63E-07 | 1.92    | down | 1.05     | up   | 1.86   | down | 1.09     | down | GINS1             |
| 8003204a      | 6.39E-07 | 1.33    | up   | 1.27     | up   | 1.87   | up   | 1.24     | down | GINS2             |
| 7902518a      | 3.80E-05 | 1.00    | down | 1.38     | down | 1.16   | down | 1.13     | up   | GIPC2             |
| 8013923a      | 8.05E-07 | 1.31    | up   | 1.35     | up   | 1.36   | up   | 1.38     | down | GIT1              |
| 8121749a      | 5.18E-05 | 3.18    | up   | 1.55     | down | 2.29   | up   | 1.33     | up   | GJA1;IFT140       |
| 7970439a      | 6.14E-06 | 1.17    | down | 1.26     | up   | 1.16   | down | 1.18     | down | GJA3              |
| 8016094a      | 9.27E-05 | 1.01    | up   | 1.25     | up   | 1.05   | down | 1.41     | down | GJC1              |

| Transcript ID | Arsenic  |      |      | Chromium |      | Nickel |      | Vanadium |      | Gene Symbol           |
|---------------|----------|------|------|----------|------|--------|------|----------|------|-----------------------|
|               | p-value  | Δ    | Reg  | Δ        | Reg  | Δ      | Reg  | Δ        | Reg  |                       |
| 8091120a      | 8.40E-06 | 1.20 | up   | 1.18     | up   | 1.17   | up   | 1.58     | down | GK5                   |
| 8162006a      | 5.93E-06 | 1.07 | down | 1.15     | up   | 1.13   | up   | 2.24     | down | GKAP1                 |
| 8174076a      | 5.37E-05 | 1.13 | up   | 1.40     | down | 1.03   | down | 1.13     | down | GLA                   |
| 8059158a      | 5.52E-05 | 1.23 | up   | 1.05     | down | 1.41   | up   | 1.05     | up   | GLB1L                 |
| 7984517a      | 1.36E-07 | 1.25 | up   | 1.81     | down | 1.17   | up   | 1.10     | up   | GLCE                  |
| 8160024a      | 2.24E-08 | 1.13 | up   | 2.18     | up   | 1.27   | up   | 2.70     | down | GLDC                  |
| 8158298a      | 2.35E-05 | 1.01 | up   | 1.47     | up   | 1.06   | up   | 1.32     | down | GLE1                  |
| 8002729a      | 3.00E-06 | 1.04 | down | 1.33     | down | 1.11   | down | 1.42     | up   | GLG1                  |
| 8139212a      | 2.98E-07 | 1.25 | up   | 1.62     | down | 1.25   | up   | 1.77     | up   | GLI3                  |
| 8155192a      | 1.36E-05 | 1.06 | up   | 2.22     | down | 1.64   | down | 1.33     | up   | GLIPR2                |
| 7992956a      | 2.15E-05 | 1.04 | up   | 1.29     | down | 1.02   | down | 1.11     | up   | GLIS2                 |
| 8159900a      | 3.44E-10 | 1.50 | down | 2.06     | down | 1.81   | down | 4.39     | up   | GLIS3                 |
| 8126135a      | 1.07E-05 | 1.01 | down | 1.18     | up   | 1.12   | up   | 1.10     | down | GLO1                  |
| 8004922a      | 4.46E-05 | 1.07 | up   | 1.20     | down | 1.57   | up   | 1.04     | up   | GLP2R                 |
| 8098006a      | 8.55E-05 | 1.37 | down | 2.06     | down | 1.54   | down | 1.19     | up   | GLRB                  |
| 8113214a      | 1.05E-05 | 1.16 | up   | 1.52     | down | 1.10   | up   | 1.79     | up   | GLRX                  |
| 7923027a      | 1.10E-05 | 1.00 | up   | 1.08     | down | 1.24   | down | 1.21     | up   | GLRX2                 |
| 8080964a      | 3.23E-07 | 1.06 | down | 1.78     | down | 1.50   | down | 2.93     | up   | GLT8D4                |
| 7986323a      | 8.80E-07 | 1.18 | down | 1.20     | up   | 1.15   | down | 1.17     | down | GLTSCR2               |
| 7934852a      | 1.46E-07 | 1.13 | down | 1.26     | up   | 1.16   | down | 1.04     | down | GLUD1;GLUD2           |
| 7922689a      | 1.04E-08 | 1.72 | up   | 1.15     | up   | 1.84   | up   | 4.22     | down | GLUL                  |
| 8154951a      | 2.19E-08 | 1.74 | up   | 1.10     | up   | 2.04   | up   | 8.98     | down | GLUL                  |
| 7940135a      | 6.45E-07 | 1.38 | down | 1.25     | up   | 1.58   | down | 1.04     | up   | GLYATL1               |
| 7948354a      | 5.52E-06 | 1.29 | down | 1.28     | down | 1.75   | down | 2.20     | up   | GLYATL2               |
| 7999233a      | 1.59E-07 | 1.03 | down | 1.30     | down | 1.42   | down | 1.36     | up   | GLYR1                 |
| 8109344a      | 8.03E-05 | 1.11 | up   | 1.14     | down | 1.31   | up   | 1.49     | up   | GM2A                  |
| 8042487a      | 8.50E-05 | 1.25 | down | 1.10     | up   | 1.22   | down | 1.05     | down | GMCL1                 |
| 7979260a      | 9.71E-05 | 1.16 | up   | 1.33     | down | 1.04   | up   | 1.12     | up   | GMFB                  |
| 8117225a      | 3.13E-07 | 1.28 | up   | 1.08     | down | 1.37   | up   | 1.03     | up   | GMNN                  |
| 8117034a      | 2.35E-06 | 1.70 | up   | 1.74     | up   | 2.04   | up   | 1.67     | down | GMPR                  |
| 7973660a      | 4.07E-05 | 1.25 | up   | 1.03     | down | 1.23   | up   | 1.09     | down | GMPR2                 |
| 8083523a      | 2.31E-05 | 1.03 | up   | 1.33     | up   | 1.03   | up   | 1.16     | down | GMPS                  |
| 8137865a      | 1.14E-05 | 1.20 | up   | 1.09     | up   | 1.30   | up   | 1.04     | up   | GNA12                 |
| 8024572a      | 2.48E-05 | 1.23 | up   | 1.28     | down | 1.70   | up   | 1.27     | up   | GNA15                 |
| 8020164a      | 7.74E-06 | 1.36 | up   | 1.18     | up   | 2.19   | up   | 2.11     | down | GNAL                  |
| 8071671a      | 1.91E-06 | 1.04 | down | 1.53     | up   | 1.57   | up   | 1.11     | down | GNAZ                  |
| 8161174a      | 7.28E-05 | 1.44 | up   | 1.04     | up   | 1.43   | up   | 1.08     | down | GNE                   |
| 7946559a      | 9.76E-06 | 1.04 | down | 1.16     | up   | 1.01   | up   | 1.45     | down | GNG10;DNAJC25-GNG10   |
| 8134257a      | 6.86E-07 | 3.84 | up   | 1.00     | down | 4.89   | up   | 1.28     | up   | GNG11                 |
| 7916843a      | 1.01E-06 | 1.02 | down | 1.14     | down | 1.11   | down | 1.16     | up   | GNG12                 |
| 7925250a      | 1.37E-05 | 1.18 | down | 1.19     | down | 1.17   | down | 1.94     | up   | GNG4                  |
| 7915015a      | 8.68E-05 | 1.05 | down | 1.12     | up   | 1.19   | down | 1.13     | down | GNL2                  |
| 8167797a      | 1.85E-06 | 1.33 | up   | 1.10     | up   | 1.13   | up   | 1.35     | down | GNL3L                 |
| 8114787a      | 3.86E-05 | 1.20 | down | 1.22     | up   | 1.21   | down | 1.12     | down | GNPDA1                |
| 8100085a      | 4.09E-05 | 1.06 | up   | 1.66     | down | 1.22   | down | 1.08     | up   | GNPDA2                |
| 8164105a      | 5.26E-05 | 1.00 | down | 1.20     | up   | 1.11   | up   | 1.45     | down | GOLGA1                |
| 7987114a      | 1.64E-05 | 1.08 | up   | 1.20     | down | 1.30   | up   | 1.28     | down | GOLGA9P;FAM7A3;FAM7A1 |
| 7987139a      | 1.47E-05 | 1.18 | up   | 1.23     | up   | 1.29   | up   | 1.37     | down | GOLGA9P               |
| 8162117a      | 4.78E-07 | 1.31 | down | 1.17     | up   | 1.38   | down | 1.61     | down | GOLM1;LOC100293491    |
| 8111331a      | 5.29E-05 | 1.13 | up   | 1.22     | up   | 1.15   | up   | 1.18     | down | GOLPH3                |
| 8046306a      | 1.12E-07 | 1.30 | up   | 1.24     | up   | 1.15   | up   | 1.01     | down | GORASP2               |
| 8006148a      | 2.94E-05 | 1.09 | up   | 1.14     | up   | 1.06   | up   | 1.44     | down | GOSR1                 |
| 8007904a      | 8.51E-09 | 1.10 | up   | 1.75     | up   | 1.22   | up   | 1.77     | down | GOSR2                 |

| Transcript ID | p-value  | Arsenic |      | Chromium |      | Nickel |      | Vanadium |      | Gene Symbol             |
|---------------|----------|---------|------|----------|------|--------|------|----------|------|-------------------------|
|               |          | Δ       | Reg  | Δ        | Reg  | Δ      | Reg  | Δ        | Reg  |                         |
| 7935627a      | 5.60E-10 | 1.31    | down | 1.68     | up   | 1.19   | down | 1.43     | down | GOT1                    |
| 8148715a      | 5.59E-06 | 1.19    | down | 1.38     | down | 1.12   | down | 1.55     | up   | GPAA1                   |
| 8016077a      | 1.64E-07 | 1.12    | down | 1.23     | up   | 1.06   | down | 1.43     | down | GPATCH8                 |
| 8105463a      | 7.00E-10 | 1.47    | down | 1.21     | down | 1.22   | down | 1.42     | up   | GPBP1                   |
| 8045816a      | 1.33E-08 | 1.62    | up   | 1.11     | down | 1.20   | up   | 1.06     | up   | GPD2                    |
| 8131069a      | 6.88E-07 | 1.50    | up   | 1.39     | up   | 1.70   | up   | 1.42     | down | GPER                    |
| 8027621a      | 1.29E-05 | 1.14    | down | 1.30     | up   | 1.30   | down | 1.11     | up   | GPI                     |
| 8172548a      | 3.59E-07 | 1.25    | up   | 1.22     | down | 1.16   | up   | 1.11     | down | GPKOW                   |
| 7913978a      | 2.04E-08 | 1.34    | up   | 1.40     | up   | 1.11   | up   | 1.04     | up   | GPN2                    |
| 8131844a      | 7.85E-08 | 3.88    | up   | 1.23     | up   | 6.72   | up   | 3.03     | down | GPNMB                   |
| 8058450a      | 2.13E-07 | 1.04    | up   | 1.21     | up   | 1.16   | down | 2.05     | up   | GPR1                    |
| 8022338a      | 7.29E-06 | 1.38    | up   | 1.19     | down | 1.36   | up   | 1.05     | up   | GPR125                  |
| 8099612a      | 8.33E-06 | 1.40    | up   | 1.30     | down | 1.31   | up   | 1.15     | down | GPR125                  |
| 8122365a      | 5.08E-06 | 1.01    | up   | 1.63     | down | 1.26   | up   | 1.61     | down | GPR126                  |
| 7974372a      | 3.59E-07 | 1.11    | down | 2.45     | down | 1.09   | down | 1.76     | up   | GPR137C                 |
| 7949796a      | 8.00E-05 | 1.01    | down | 1.27     | up   | 1.02   | down | 1.11     | up   | GPR152;CABP4            |
| 8083839a      | 5.86E-08 | 1.29    | up   | 2.53     | up   | 1.57   | up   | 3.21     | down | GPR160                  |
| 7987439a      | 9.07E-07 | 1.18    | up   | 2.27     | down | 1.02   | down | 1.18     | up   | GPR176                  |
| 8157727a      | 2.29E-05 | 1.01    | up   | 1.27     | up   | 1.00   | down | 1.93     | down | GPR21                   |
| 8045336a      | 2.56E-09 | 1.57    | up   | 1.58     | down | 1.53   | up   | 2.79     | up   | GPR39;LYPD1             |
| 8037614a      | 7.71E-05 | 1.45    | up   | 1.09     | down | 1.80   | down | 1.22     | down | GPR4                    |
| 7996081a      | 1.87E-07 | 1.61    | up   | 1.97     | down | 2.50   | up   | 2.23     | up   | GPR56                   |
| 8128316a      | 1.11E-06 | 1.03    | down | 2.01     | up   | 1.04   | down | 1.05     | up   | GPR63                   |
| 8052143a      | 4.76E-05 | 1.09    | up   | 1.27     | up   | 1.08   | down | 1.43     | down | GPR75;ASB3;LOC100302652 |
| 8168968a      | 4.06E-05 | 1.03    | up   | 1.58     | down | 1.34   | down | 1.09     | down | GPRASP1                 |
| 7999909a      | 2.74E-09 | 3.09    | up   | 1.43     | down | 3.29   | up   | 1.40     | down | GPRC5B                  |
| 8009639a      | 4.73E-05 | 1.16    | up   | 1.01     | down | 1.32   | up   | 1.06     | down | GPRC5C                  |
| 7995362a      | 5.44E-07 | 1.19    | down | 1.50     | up   | 1.24   | down | 1.53     | up   | GPT2                    |
| 7901460a      | 7.29E-08 | 1.95    | down | 1.39     | up   | 2.56   | down | 4.00     | down | GPX7                    |
| 8105348a      | 1.45E-05 | 1.42    | down | 1.39     | down | 1.38   | down | 1.36     | up   | GPX8                    |
| 8081758a      | 4.47E-05 | 1.88    | up   | 1.33     | up   | 1.89   | up   | 1.21     | down | GRAMD1C                 |
| 8018364a      | 2.98E-07 | 1.25    | up   | 1.22     | up   | 1.11   | up   | 1.15     | down | GRB2                    |
| 8155250a      | 7.82E-05 | 1.20    | up   | 1.01     | down | 1.20   | up   | 1.11     | down | GRHPR                   |
| 7964759a      | 3.49E-06 | 1.47    | up   | 2.11     | up   | 1.20   | down | 1.50     | down | GRIP1                   |
| 8172504a      | 1.86E-05 | 1.18    | up   | 1.30     | down | 1.03   | down | 1.24     | down | GRIPAP1                 |
| 8007620a      | 7.49E-06 | 1.02    | down | 1.16     | up   | 1.13   | up   | 1.60     | down | GRN                     |
| 8100834a      | 1.14E-05 | 1.07    | down | 1.25     | up   | 1.20   | down | 1.09     | up   | GRSF1                   |
| 8003844a      | 3.98E-06 | 1.23    | up   | 1.25     | up   | 1.04   | up   | 1.33     | down | GSG2                    |
| 7999532a      | 1.71E-06 | 1.25    | up   | 1.50     | up   | 1.02   | up   | 1.27     | down | GSPT1                   |
| 8065817a      | 2.26E-05 | 1.21    | up   | 1.13     | up   | 1.37   | up   | 1.10     | up   | GSS                     |
| 8127072a      | 1.12E-05 | 1.23    | up   | 1.01     | up   | 1.03   | down | 3.20     | up   | GSTA1                   |
| 8127065a      | 3.75E-05 | 1.06    | up   | 1.04     | down | 1.13   | down | 1.67     | up   | GSTA2                   |
| 8127094a      | 1.69E-05 | 1.34    | up   | 1.98     | down | 1.23   | down | 1.40     | up   | GSTA4                   |
| 8096688a      | 5.22E-05 | 1.12    | down | 1.40     | down | 1.32   | down | 1.13     | up   | GSTCD                   |
| 7918379a      | 2.90E-05 | 1.05    | up   | 1.35     | up   | 1.42   | down | 1.33     | down | GSTM3                   |
| 7930304a      | 2.21E-06 | 1.14    | down | 1.07     | down | 1.26   | down | 1.56     | up   | GSTO1                   |
| 7930311a      | 6.39E-05 | 1.07    | up   | 1.28     | down | 1.38   | down | 1.34     | up   | GSTO2                   |
| 8095074a      | 3.43E-05 | 1.10    | down | 1.23     | up   | 1.06   | down | 1.00     | down | GSX2                    |
| 8055606a      | 4.87E-05 | 1.30    | up   | 1.09     | down | 1.37   | up   | 1.00     | down | GTDC1                   |
| 7989315a      | 4.77E-05 | 1.04    | down | 1.47     | down | 1.00   | up   | 1.14     | down | GTF2A2                  |
| 8033135a      | 6.00E-05 | 1.02    | up   | 1.33     | up   | 1.08   | up   | 1.15     | down | GTF2F1                  |
| 7968915a      | 5.33E-05 | 1.04    | down | 1.29     | down | 1.47   | down | 1.30     | up   | GTF2F2                  |
| 8177674a      | 2.53E-05 | 1.10    | up   | 1.21     | down | 1.23   | up   | 1.50     | up   | GTF2H2;GTF2H2B-D        |

| Transcript ID | Arsenic  |          |      | Chromium |      | Nickel   |      | Vanadium |      | Gene Symbol           |
|---------------|----------|----------|------|----------|------|----------|------|----------|------|-----------------------|
|               | p-value  | $\Delta$ | Reg  | $\Delta$ | Reg  | $\Delta$ | Reg  | $\Delta$ | Reg  |                       |
| 7959623a      | 4.91E-08 | 1.22     | down | 1.18     | up   | 1.24     | down | 1.00     | up   | GTF2H3                |
| 8140170a      | 1.22E-06 | 1.03     | up   | 1.76     | down | 1.05     | up   | 1.30     | up   | GTF2IRD2/B;GTF2IRD2P  |
| 7968242a      | 5.32E-08 | 1.06     | up   | 1.44     | down | 1.16     | down | 1.59     | up   | GTF3A                 |
| 8051075a      | 3.66E-07 | 1.25     | up   | 1.20     | up   | 1.18     | up   | 1.07     | down | GTF3C2                |
| 8158918a      | 5.75E-05 | 1.11     | down | 1.40     | up   | 1.02     | down | 1.39     | down | GTF3C4                |
| 8158961a      | 1.83E-06 | 1.04     | down | 1.32     | up   | 1.10     | up   | 1.53     | down | GTF3C5                |
| 8171079a      | 3.32E-10 | 1.51     | up   | 1.51     | up   | 1.88     | up   | 1.46     | down | GTPBP6                |
| 7910241a      | 9.84E-08 | 1.03     | up   | 1.30     | down | 1.25     | down | 1.22     | up   | GUK1                  |
| 8046906a      | 2.32E-08 | 7.74     | up   | 6.01     | up   | 11.27    | up   | 10.18    | down | GULP1                 |
| 8165817a      | 2.20E-05 | 1.36     | down | 1.88     | up   | 1.21     | down | 3.52     | down | GYG2                  |
| 8045009a      | 3.92E-10 | 1.44     | up   | 2.36     | down | 1.38     | up   | 1.60     | up   | GYPC                  |
| 8061373a      | 1.61E-05 | 1.66     | down | 1.13     | down | 1.74     | down | 1.01     | down | GZF1                  |
| 8072926a      | 3.81E-05 | 1.55     | down | 1.59     | down | 1.89     | down | 1.33     | up   | H1FO                  |
| 7952179a      | 9.15E-06 | 1.03     | up   | 1.34     | up   | 1.15     | up   | 1.22     | down | H2AFX                 |
| 8114225a      | 4.32E-05 | 1.15     | down | 1.05     | up   | 1.19     | down | 1.02     | down | H2AFY                 |
| 8101945a      | 7.11E-06 | 1.07     | down | 1.23     | down | 1.12     | down | 1.17     | up   | H2AFZ                 |
| 8102860a      | 3.24E-06 | 1.10     | down | 1.35     | down | 1.18     | down | 1.11     | up   | H3F3A;H3F3B;LOC440926 |
| 8169740a      | 3.60E-06 | 1.06     | down | 1.32     | down | 1.11     | down | 1.13     | up   | H3F3A;H3F3B;LOC440926 |
| 8085608a      | 8.95E-06 | 1.69     | down | 1.11     | down | 1.18     | down | 1.23     | down | HACL1                 |
| 8096753a      | 1.36E-05 | 1.07     | down | 1.33     | down | 1.19     | down | 1.39     | up   | HADH                  |
| 7977841a      | 9.15E-08 | 1.00     | down | 1.68     | down | 1.07     | up   | 1.47     | up   | HAUS4                 |
| 8132843a      | 1.11E-05 | 1.03     | up   | 1.44     | up   | 1.07     | down | 1.32     | down | HAUS6                 |
| 8175782a      | 1.13E-05 | 1.01     | up   | 1.61     | down | 1.07     | down | 1.22     | up   | HAUS7;TREX2           |
| 8114572a      | 4.06E-05 | 1.24     | down | 2.30     | down | 1.38     | down | 1.53     | up   | HBEGF                 |
| 7991750a      | 1.30E-05 | 1.19     | up   | 1.41     | down | 1.12     | up   | 1.15     | up   | HBZ                   |
| 8165995a      | 4.57E-06 | 1.05     | down | 1.36     | up   | 1.11     | down | 1.11     | down | HCCS                  |
| 8009513a      | 6.49E-05 | 1.12     | down | 1.41     | down | 1.10     | down | 1.21     | up   | hCG_1644301           |
| 7930205a      | 6.94E-06 | 1.30     | up   | 1.09     | up   | 1.16     | up   | 1.31     | down | hCG_2024410           |
| 8089911a      | 1.11E-06 | 2.21     | up   | 2.43     | down | 1.43     | up   | 1.51     | up   | HCLS1                 |
| 8167369a      | 4.06E-06 | 1.11     | up   | 1.48     | down | 1.15     | up   | 1.12     | down | HDAC6                 |
| 8173531a      | 1.58E-08 | 1.12     | up   | 1.46     | down | 1.04     | up   | 1.24     | down | HDAC8                 |
| 7991070a      | 5.10E-06 | 1.02     | up   | 1.42     | down | 1.14     | up   | 1.31     | down | HDFRFP3               |
| 8163505a      | 1.46E-05 | 1.06     | up   | 1.38     | up   | 1.18     | up   | 1.48     | down | HDHD3                 |
| 8060225a      | 7.92E-06 | 1.24     | up   | 1.09     | up   | 1.27     | up   | 1.02     | up   | HDLBP                 |
| 8131000a      | 1.01E-07 | 1.09     | up   | 1.26     | up   | 1.29     | up   | 1.16     | down | HEATR2;LOC727799      |
| 8051464a      | 1.14E-06 | 1.24     | up   | 1.00     | down | 1.28     | up   | 1.08     | down | HEATR5B               |
| 8122317a      | 7.90E-08 | 1.29     | up   | 1.56     | down | 1.27     | up   | 1.07     | down | HEBP2                 |
| 8122343a      | 4.66E-05 | 1.10     | up   | 1.17     | down | 1.34     | up   | 1.10     | down | HECA                  |
| 7956894a      | 9.11E-05 | 1.29     | up   | 1.18     | up   | 1.05     | up   | 1.42     | down | HELB                  |
| 7929438a      | 8.10E-06 | 1.30     | down | 1.16     | up   | 1.22     | down | 1.22     | down | HELLS                 |
| 7986863a      | 2.76E-05 | 1.04     | up   | 1.34     | down | 1.21     | up   | 1.29     | down | HERC2                 |
| 7986701a      | 4.51E-05 | 1.03     | down | 1.22     | down | 1.12     | up   | 1.32     | down | HERC2P2;HERC2P3       |
| 8001099a      | 1.43E-05 | 1.00     | up   | 1.33     | down | 1.15     | up   | 1.35     | down | HERC2P2-4             |
| 8096385a      | 5.01E-06 | 1.24     | up   | 1.59     | down | 1.11     | down | 1.37     | up   | HERC3                 |
| 8096361a      | 4.91E-08 | 1.84     | up   | 3.63     | up   | 2.84     | up   | 3.01     | down | HERC5                 |
| 8096335a      | 9.43E-05 | 1.44     | up   | 1.16     | up   | 1.94     | up   | 1.59     | down | HERC6                 |
| 8059989a      | 1.23E-06 | 1.18     | up   | 1.02     | down | 1.35     | up   | 1.04     | up   | HES6                  |
| 8106252a      | 1.05E-09 | 1.09     | down | 1.14     | down | 1.04     | up   | 1.86     | up   | HEXB                  |
| 8007750a      | 3.64E-05 | 1.24     | up   | 1.22     | up   | 1.20     | up   | 1.11     | down | HEXIM2                |
| 8117343a      | 1.98E-05 | 1.55     | up   | 1.16     | down | 1.33     | up   | 1.28     | up   | HFE                   |
| 7929282a      | 1.61E-05 | 1.07     | down | 1.23     | up   | 1.15     | down | 1.35     | down | HHEX                  |
| 8097628a      | 1.05E-09 | 1.18     | up   | 16.69    | down | 1.09     | down | 1.79     | up   | HHIP                  |
| 8138776a      | 2.27E-06 | 1.04     | up   | 1.41     | down | 1.08     | up   | 1.51     | up   | HIBADH                |

| Transcript ID | p-value  | Arsenic  |      | Chromium |      | Nickel   |      | Vanadium |      | Gene Symbol           |
|---------------|----------|----------|------|----------|------|----------|------|----------|------|-----------------------|
|               |          | $\Delta$ | Reg  | $\Delta$ | Reg  | $\Delta$ | Reg  | $\Delta$ | Reg  |                       |
| 7944435a      | 9.28E-07 | 1.04     | up   | 1.46     | up   | 1.07     | up   | 1.30     | down | HINFP                 |
| 8121886a      | 3.90E-07 | 1.07     | up   | 1.38     | up   | 1.68     | up   | 1.44     | down | HINT3                 |
| 8000748a      | 1.57E-07 | 1.33     | up   | 1.41     | down | 1.21     | up   | 1.22     | up   | HIRIP3                |
| 7988124a      | 1.69E-08 | 2.37     | down | 1.06     | up   | 1.38     | down | 2.28     | down | HISPPD2A              |
| 8124430a      | 2.27E-05 | 1.32     | down | 1.57     | down | 1.46     | down | 1.19     | up   | HIST1H1D              |
| 8124540a      | 2.24E-06 | 1.35     | up   | 1.38     | down | 1.21     | up   | 1.00     | up   | HIST1H2AM             |
| 8117382a      | 7.27E-05 | 1.48     | up   | 1.18     | up   | 1.14     | up   | 1.30     | down | HIST1H2BD             |
| 8117426a      | 7.78E-05 | 1.46     | down | 1.14     | up   | 1.37     | down | 1.05     | up   | HIST1H2BH             |
| 8124510a      | 5.30E-08 | 1.23     | up   | 1.43     | down | 1.25     | up   | 1.01     | down | HIST1H2BL             |
| 8117594a      | 2.74E-06 | 1.01     | up   | 2.32     | down | 2.08     | up   | 1.19     | up   | HIST1H2BM             |
| 8124537a      | 4.46E-08 | 1.08     | down | 2.63     | down | 1.11     | up   | 1.37     | up   | HIST1H3J              |
| 8117422a      | 1.66E-05 | 1.30     | down | 4.13     | down | 4.79     | down | 2.22     | down | HIST1H4F              |
| 8124534a      | 7.23E-05 | 1.05     | up   | 1.07     | down | 1.15     | up   | 1.14     | down | HIST1H4L              |
| 7919642a      | 4.66E-06 | 1.16     | down | 1.51     | down | 1.21     | down | 1.06     | up   | HIST2H2AB             |
| 7919584a      | 8.32E-05 | 1.77     | up   | 1.04     | down | 1.00     | down | 1.32     | down | HIST2H2BE-F;HIST2H2BA |
| 7919627a      | 1.01E-06 | 1.96     | up   | 1.56     | up   | 1.35     | up   | 2.45     | down | HIST2H4A;HIST2H4B     |
| 8116910a      | 6.86E-06 | 1.14     | up   | 1.55     | down | 1.73     | up   | 1.06     | down | HIVEP1                |
| 7915392a      | 4.50E-06 | 1.46     | up   | 1.19     | down | 1.23     | up   | 1.41     | up   | HIVEP3                |
| 8042942a      | 4.57E-06 | 1.06     | up   | 1.88     | up   | 1.83     | down | 1.46     | up   | HK2                   |
| 8180086a      | 1.16E-07 | 2.15     | up   | 1.13     | down | 1.10     | down | 1.65     | up   | HLA-DMA;HLA-DMB       |
| 8179103a      | 1.12E-05 | 1.30     | up   | 1.09     | up   | 1.38     | up   | 1.06     | down | HLA-E;HLA-B;HLA-C     |
| 8008588a      | 1.33E-08 | 1.30     | up   | 2.47     | down | 1.51     | down | 5.76     | up   | HLF                   |
| 7908204a      | 1.74E-05 | 1.19     | up   | 1.11     | down | 1.15     | up   | 1.02     | up   | HMCN1                 |
| 8170468a      | 2.81E-05 | 1.50     | down | 1.59     | down | 1.33     | down | 1.27     | up   | HMGB3                 |
| 8106280a      | 3.43E-07 | 1.11     | down | 1.54     | down | 1.28     | up   | 1.37     | up   | HMGCR                 |
| 8111941a      | 1.40E-07 | 1.84     | up   | 1.46     | down | 3.11     | up   | 2.01     | down | HMGCS1                |
| 8117510a      | 5.06E-09 | 1.15     | up   | 1.60     | down | 1.29     | up   | 1.07     | up   | HMGN4                 |
| 7992987a      | 5.86E-08 | 1.13     | up   | 1.39     | down | 1.41     | down | 1.76     | up   | HMOX2                 |
| 7992337a      | 2.21E-05 | 1.04     | up   | 1.18     | down | 1.20     | down | 1.20     | up   | HN1L;CRAMP1L          |
| 7959234a      | 6.82E-05 | 1.19     | up   | 1.10     | down | 1.23     | up   | 1.12     | down | HNF1A                 |
| 7995574a      | 3.77E-05 | 1.11     | down | 1.00     | down | 1.13     | down | 1.09     | down | HNRNPA1;HNRPA1L-2     |
| 8168852a      | 2.96E-05 | 1.01     | up   | 1.49     | down | 1.25     | down | 1.23     | down | HNRNPH2               |
| 8162047a      | 4.74E-05 | 1.05     | down | 1.09     | up   | 1.05     | down | 1.09     | down | HNRNPK                |
| 8036613a      | 2.50E-05 | 1.07     | down | 1.03     | up   | 1.04     | down | 1.16     | down | HNRNPL                |
| 7925565a      | 7.03E-05 | 1.09     | down | 1.09     | up   | 1.18     | down | 1.08     | down | HNRNPU                |
| 8034313a      | 1.68E-07 | 1.14     | down | 1.00     | down | 1.16     | down | 1.06     | down | HNRPA1L-2;HNRPA1      |
| 8101340a      | 3.49E-07 | 1.21     | down | 1.17     | down | 1.28     | down | 1.07     | up   | HNRPDL                |
| 8051605a      | 5.30E-05 | 1.05     | down | 1.14     | down | 1.13     | down | 1.11     | up   | HNRPLL                |
| 7991034a      | 1.65E-05 | 1.47     | down | 1.08     | down | 1.29     | down | 2.45     | up   | HOMER2                |
| 8100507a      | 1.99E-08 | 1.03     | up   | 1.30     | down | 1.04     | down | 1.20     | up   | HOPX                  |
| 8072304a      | 1.28E-05 | 1.12     | up   | 1.40     | down | 1.08     | up   | 1.12     | up   | HORMAD2               |
| 8138708a      | 2.05E-07 | 1.51     | up   | 1.09     | down | 2.37     | up   | 1.52     | down | HOXA1                 |
| 8138765a      | 6.11E-09 | 1.05     | down | 1.53     | up   | 1.04     | up   | 1.45     | down | HOXA11                |
| 8138770a      | 3.11E-05 | 1.02     | up   | 1.05     | up   | 1.30     | up   | 1.07     | down | HOXA13                |
| 8138718a      | 4.43E-07 | 1.09     | up   | 1.00     | down | 2.16     | up   | 1.65     | down | HOXA2                 |
| 8138721a      | 1.57E-06 | 1.19     | up   | 1.21     | up   | 1.57     | up   | 1.23     | down | HOXA3                 |
| 8138728a      | 6.48E-06 | 1.32     | up   | 1.05     | up   | 1.50     | up   | 1.07     | down | HOXA4                 |
| 8138735a      | 7.12E-05 | 1.20     | up   | 1.18     | up   | 1.28     | up   | 1.26     | down | HOXA5                 |
| 8016487a      | 2.29E-06 | 1.07     | up   | 1.45     | up   | 1.48     | up   | 1.01     | up   | HOXB13                |
| 8016438a      | 1.44E-08 | 1.23     | down | 1.89     | down | 1.26     | down | 2.33     | up   | HOXB2                 |
| 8016444a      | 1.27E-07 | 1.23     | down | 1.39     | down | 1.33     | down | 1.54     | up   | HOXB3                 |
| 8016452a      | 1.26E-05 | 1.01     | up   | 1.24     | down | 1.02     | down | 1.37     | up   | HOXB4                 |
| 8016468a      | 5.90E-05 | 1.03     | up   | 1.08     | down | 1.07     | up   | 1.97     | up   | HOXB7                 |

| Transcript ID | Arsenic  |          |      | Chromium |      | Nickel   |      | Vanadium |      | Gene Symbol   |
|---------------|----------|----------|------|----------|------|----------|------|----------|------|---------------|
|               | p-value  | $\Delta$ | Reg  | $\Delta$ | Reg  | $\Delta$ | Reg  | $\Delta$ | Reg  |               |
| 7955869a      | 5.68E-06 | 1.37     | down | 2.79     | up   | 1.31     | up   | 1.24     | up   | HOXC8         |
| 8040238a      | 6.55E-10 | 1.68     | up   | 1.46     | down | 1.67     | up   | 2.27     | up   | HPCAL1        |
| 8101449a      | 1.59E-05 | 1.24     | down | 2.21     | down | 1.42     | down | 1.19     | up   | HPSE          |
| 7946167a      | 6.18E-06 | 1.02     | down | 1.31     | up   | 1.08     | down | 1.06     | down | HPX           |
| 8149652a      | 2.33E-06 | 1.09     | up   | 1.50     | down | 1.09     | up   | 1.15     | down | HR            |
| 8077851a      | 3.20E-05 | 1.27     | down | 1.72     | down | 1.25     | down | 1.11     | up   | HRH1          |
| 8151942a      | 3.04E-07 | 1.41     | up   | 1.25     | up   | 1.28     | up   | 1.71     | down | HRSP12        |
| 8050594a      | 9.26E-06 | 1.40     | up   | 1.01     | up   | 1.43     | up   | 1.22     | up   | HS1BP3        |
| 7898677a      | 1.05E-05 | 1.61     | up   | 1.98     | up   | 1.69     | up   | 1.19     | down | HS6ST1        |
| 8055130a      | 2.24E-08 | 1.41     | up   | 1.40     | up   | 1.55     | up   | 1.46     | down | HS6ST1        |
| 7997520a      | 1.54E-05 | 1.03     | up   | 1.31     | up   | 1.35     | up   | 1.38     | down | HSBP1         |
| 8172905a      | 1.93E-09 | 1.18     | up   | 1.23     | down | 1.16     | up   | 1.18     | down | HSD17B10      |
| 7939465a      | 6.28E-05 | 1.04     | up   | 1.30     | up   | 1.01     | up   | 1.24     | down | HSD17B12      |
| 8107532a      | 5.70E-05 | 1.42     | down | 1.24     | down | 1.41     | down | 1.05     | down | HSD17B4       |
| 7995007a      | 2.98E-05 | 1.43     | up   | 1.03     | up   | 1.36     | up   | 1.17     | up   | HSD3B7        |
| 8003116a      | 2.56E-09 | 1.61     | up   | 1.38     | up   | 2.09     | up   | 1.20     | down | HSDL1         |
| 8157233a      | 1.52E-05 | 1.24     | down | 1.19     | up   | 1.09     | down | 1.63     | down | HSDL2         |
| 7936516a      | 7.65E-09 | 1.05     | up   | 2.84     | up   | 1.81     | up   | 1.36     | up   | HSPA12A       |
| 8069532a      | 2.33E-07 | 1.37     | up   | 1.30     | down | 1.14     | up   | 1.43     | up   | HSPA13        |
| 7975076a      | 1.69E-06 | 1.78     | up   | 2.11     | down | 1.00     | up   | 1.48     | up   | HSPA2         |
| 8097335a      | 2.69E-05 | 1.24     | down | 1.64     | up   | 1.20     | down | 1.16     | down | HSPA4L        |
| 8164165a      | 2.82E-05 | 1.08     | down | 1.17     | up   | 1.23     | down | 1.02     | down | HSPA5         |
| 8042283a      | 8.03E-06 | 1.56     | up   | 1.00     | up   | 1.36     | up   | 1.59     | down | HSPC159       |
| 8058052a      | 6.39E-05 | 1.09     | up   | 1.19     | up   | 1.03     | up   | 1.06     | down | HSPD1         |
| 7913450a      | 1.30E-09 | 1.25     | down | 1.54     | down | 1.80     | down | 2.09     | up   | HSPG2;LDLRAD2 |
| 8170166a      | 1.99E-07 | 1.15     | up   | 1.37     | down | 1.14     | up   | 1.31     | down | HTATSF1       |
| 8127692a      | 2.20E-05 | 1.18     | up   | 1.09     | down | 1.15     | up   | 1.13     | down | HTR1B         |
| 7913566a      | 1.94E-05 | 1.55     | up   | 1.16     | down | 2.27     | up   | 1.55     | down | HTR1D         |
| 7934970a      | 4.81E-05 | 1.19     | down | 1.15     | up   | 1.58     | down | 1.40     | up   | HTR7          |
| 7931097a      | 6.94E-05 | 1.19     | up   | 1.63     | down | 1.11     | down | 1.71     | up   | HTRA1         |
| 8042905a      | 2.13E-07 | 1.32     | up   | 1.35     | up   | 1.26     | up   | 1.08     | down | HTRA2;LOXL3   |
| 8172914a      | 1.41E-05 | 1.19     | up   | 1.15     | down | 1.12     | up   | 1.22     | down | HUWE1         |
| 7915529a      | 2.72E-06 | 1.33     | down | 1.07     | down | 1.13     | down | 1.55     | up   | HYI;KIAA0467  |
| 7945040a      | 2.03E-07 | 1.09     | down | 1.20     | down | 1.02     | down | 2.93     | down | HYLS1         |
| 7952145a      | 2.18E-05 | 1.05     | down | 1.41     | up   | 1.06     | down | 1.13     | down | HYOU1         |
| 8040163a      | 2.42E-07 | 1.11     | up   | 1.84     | down | 1.16     | up   | 1.14     | up   | IAH1          |
| 8162313a      | 8.50E-05 | 1.18     | down | 1.09     | up   | 1.11     | down | 1.23     | down | IARS          |
| 8070720a      | 2.93E-08 | 1.02     | down | 1.73     | up   | 1.15     | up   | 2.41     | down | ICOSLG        |
| 8061564a      | 7.19E-05 | 1.05     | down | 2.66     | down | 1.47     | up   | 2.17     | up   | ID1           |
| 8117120a      | 1.19E-08 | 1.57     | up   | 1.11     | down | 1.72     | up   | 1.03     | up   | ID4           |
| 7991374a      | 3.18E-08 | 1.30     | up   | 2.61     | down | 1.40     | up   | 1.70     | up   | IDH2          |
| 7985134a      | 2.48E-05 | 1.03     | up   | 1.02     | up   | 1.05     | up   | 1.34     | down | IDH3A;ACSBG1  |
| 8064522a      | 1.51E-06 | 1.43     | down | 1.06     | up   | 1.74     | down | 1.08     | down | IDH3B         |
| 8175844a      | 9.59E-07 | 1.13     | down | 1.56     | down | 1.17     | down | 1.14     | up   | IDH3G         |
| 8175593a      | 8.89E-09 | 1.27     | down | 2.05     | down | 1.53     | down | 2.03     | up   | IDS           |
| 8170390a      | 4.37E-08 | 1.19     | down | 1.83     | down | 1.43     | down | 1.90     | up   | IDS;LOC727913 |
| 8179704a      | 1.47E-07 | 1.65     | up   | 1.34     | down | 1.60     | up   | 1.26     | up   | IER3          |
| 7976443a      | 3.92E-08 | 2.51     | up   | 1.07     | down | 1.09     | up   | 1.12     | up   | IFI27         |
| 7976436a      | 8.88E-07 | 1.23     | up   | 1.13     | down | 1.14     | up   | 1.18     | up   | IFI27L1       |
| 7981046a      | 3.05E-07 | 1.21     | up   | 1.48     | down | 1.01     | down | 1.45     | up   | IFI27L2       |
| 8056285a      | 6.85E-08 | 2.54     | up   | 1.05     | up   | 2.13     | up   | 1.94     | down | IFIH1         |
| 7937335a      | 1.82E-10 | 3.07     | up   | 1.16     | down | 3.61     | up   | 2.11     | down | IFITM1        |
| 7937330a      | 2.48E-07 | 1.25     | up   | 1.30     | down | 1.25     | up   | 1.15     | down | IFITM2        |



| Transcript ID | p-value  | Arsenic  |      | Chromium |      | Nickel   |      | Vanadium |      | Gene Symbol     |
|---------------|----------|----------|------|----------|------|----------|------|----------|------|-----------------|
|               |          | $\Delta$ | Reg  | $\Delta$ | Reg  | $\Delta$ | Reg  | $\Delta$ | Reg  |                 |
| 7945371a      | 2.40E-05 | 1.33     | up   | 1.08     | down | 1.38     | up   | 1.08     | down | IFITM3          |
| 8160435a      | 2.48E-07 | 1.09     | down | 2.33     | down | 2.05     | down | 1.86     | up   | IFNE            |
| 8129861a      | 5.45E-05 | 1.08     | up   | 1.23     | down | 1.30     | up   | 1.03     | up   | IFNGR1          |
| 8068280a      | 1.96E-05 | 1.00     | down | 1.37     | down | 1.05     | up   | 1.05     | up   | IFNGR2          |
| 8168087a      | 1.79E-09 | 1.36     | up   | 1.32     | down | 1.22     | up   | 1.03     | down | IGBP1           |
| 8008151a      | 9.94E-06 | 1.96     | down | 1.69     | up   | 1.88     | down | 1.07     | down | IGF2BP1         |
| 8092552a      | 4.92E-06 | 1.04     | up   | 1.50     | up   | 1.11     | up   | 1.45     | down | IGF2BP2         |
| 8100541a      | 4.29E-09 | 1.11     | down | 2.07     | down | 1.15     | up   | 2.10     | up   | IGFBP7;POLR2B   |
| 8029779a      | 8.21E-13 | 1.07     | up   | 5.62     | down | 1.10     | up   | 1.02     | down | IGFL1           |
| 8030823a      | 3.72E-05 | 1.16     | down | 1.48     | up   | 1.29     | down | 1.11     | down | IGLON5          |
| 8163023a      | 5.12E-06 | 1.12     | down | 1.33     | up   | 1.08     | down | 1.38     | down | IKBKAP          |
| 7909188a      | 2.05E-05 | 1.12     | up   | 1.34     | down | 1.06     | down | 1.30     | up   | IKBKE           |
| 8170955a      | 6.76E-05 | 1.05     | up   | 1.39     | down | 1.23     | down | 1.14     | up   | IKBKG           |
| 8068254a      | 5.41E-07 | 1.47     | up   | 1.07     | up   | 1.45     | up   | 1.28     | down | IL10RB          |
| 8039484a      | 4.69E-05 | 1.26     | down | 1.56     | down | 1.66     | down | 1.35     | up   | IL11            |
| 8169580a      | 1.21E-07 | 1.61     | up   | 1.69     | down | 1.73     | up   | 1.46     | down | IL13RA1         |
| 8043995a      | 3.65E-08 | 2.32     | up   | 2.47     | down | 1.52     | up   | 3.19     | up   | IL1R1           |
| 8084794a      | 3.06E-05 | 1.12     | up   | 1.73     | down | 1.06     | up   | 1.17     | down | IL1RAP          |
| 8044008a      | 2.40E-05 | 1.05     | down | 1.35     | down | 1.16     | down | 1.17     | up   | IL1RL2          |
| 8105411a      | 1.55E-07 | 1.17     | down | 1.42     | down | 1.53     | down | 6.01     | up   | IL31RA          |
| 7994280a      | 3.34E-05 | 1.11     | up   | 1.39     | down | 1.23     | up   | 1.18     | up   | IL4R            |
| 8131803a      | 4.39E-07 | 1.93     | up   | 1.34     | down | 3.29     | up   | 1.38     | up   | IL6             |
| 8112139a      | 1.05E-09 | 1.65     | down | 1.46     | down | 1.45     | down | 1.43     | up   | IL6ST           |
| 8104901a      | 4.32E-06 | 1.98     | up   | 3.23     | up   | 1.93     | up   | 2.16     | down | IL7R            |
| 7922018a      | 1.22E-08 | 2.84     | down | 1.46     | up   | 2.63     | down | 1.07     | up   | ILD2            |
| 8025697a      | 4.18E-05 | 1.03     | down | 1.19     | up   | 1.02     | down | 1.11     | down | ILF3            |
| 8059969a      | 1.75E-05 | 1.29     | up   | 1.00     | up   | 1.31     | up   | 1.00     | up   | ILKAP           |
| 7947332a      | 5.29E-05 | 1.09     | down | 1.00     | up   | 1.25     | up   | 1.34     | down | IMMP1L          |
| 8045171a      | 2.98E-07 | 1.42     | up   | 1.36     | up   | 1.18     | up   | 1.16     | down | IMP4            |
| 8151549a      | 4.17E-05 | 1.09     | up   | 1.07     | up   | 1.18     | up   | 1.49     | down | IMPA1           |
| 8020183a      | 5.50E-06 | 1.31     | up   | 1.05     | up   | 1.69     | up   | 1.16     | down | IMPA2           |
| 8142795a      | 2.07E-07 | 1.12     | up   | 1.46     | up   | 1.13     | up   | 1.16     | down | IMPDH1          |
| 8087254a      | 2.50E-05 | 1.21     | down | 1.20     | down | 1.43     | down | 1.16     | up   | IMPDH2          |
| 7970096a      | 5.46E-05 | 1.16     | down | 1.17     | up   | 1.06     | down | 1.02     | down | ING1            |
| 8077226a      | 6.65E-05 | 1.23     | up   | 1.05     | down | 1.25     | up   | 1.06     | down | ING5            |
| 8139207a      | 8.62E-09 | 1.09     | down | 1.33     | down | 1.02     | up   | 2.67     | up   | INHBA           |
| 8044927a      | 3.62E-05 | 1.05     | down | 1.51     | up   | 1.08     | down | 1.74     | up   | INHBB           |
| 8042859a      | 3.91E-05 | 1.29     | up   | 1.13     | up   | 1.15     | up   | 1.00     | down | INO80B          |
| 7994715a      | 2.44E-06 | 1.20     | up   | 1.28     | up   | 1.12     | up   | 1.05     | up   | INO80E          |
| 8102950a      | 5.45E-10 | 1.13     | up   | 2.41     | down | 1.10     | down | 2.53     | up   | INPP4B          |
| 7931479a      | 2.75E-06 | 1.39     | down | 1.47     | down | 1.22     | down | 1.49     | up   | INPP5A          |
| 7915101a      | 1.91E-05 | 1.08     | up   | 1.04     | down | 1.24     | down | 1.14     | up   | INPP5B          |
| 8011062a      | 3.46E-06 | 1.32     | up   | 1.39     | up   | 1.30     | up   | 1.49     | down | INPP5K          |
| 8137526a      | 1.96E-07 | 1.05     | down | 2.00     | down | 1.31     | up   | 1.32     | up   | INSIG1          |
| 8044766a      | 4.97E-05 | 1.09     | up   | 1.43     | down | 1.04     | down | 1.23     | up   | INSIG2          |
| 8033362a      | 3.25E-07 | 1.04     | down | 1.72     | up   | 1.44     | up   | 1.70     | down | INSR            |
| 8017283a      | 2.22E-10 | 1.33     | up   | 1.38     | up   | 1.50     | up   | 1.36     | down | INTS2           |
| 7905631a      | 8.93E-05 | 1.08     | down | 1.44     | down | 1.11     | down | 1.13     | up   | INTS3           |
| 8133095a      | 4.47E-05 | 1.06     | down | 1.23     | up   | 1.12     | down | 1.30     | down | INTS4L2;INTS4L1 |
| 7971692a      | 3.01E-05 | 1.08     | up   | 1.30     | down | 1.20     | down | 1.28     | up   | INTS6           |
| 8150014a      | 1.57E-06 | 1.31     | up   | 1.13     | up   | 1.21     | up   | 1.17     | down | INTS9           |
| 8105545a      | 3.74E-08 | 1.82     | down | 1.26     | down | 1.21     | down | 1.28     | up   | IPO11           |
| 7908732a      | 6.65E-05 | 1.11     | down | 1.25     | down | 1.23     | down | 1.10     | up   | IPO9            |

| Transcript ID | Arsenic  |          |      | Chromium |      | Nickel   |      | Vanadium |      | Gene Symbol        |
|---------------|----------|----------|------|----------|------|----------|------|----------|------|--------------------|
|               | p-value  | $\Delta$ | Reg  | $\Delta$ | Reg  | $\Delta$ | Reg  | $\Delta$ | Reg  |                    |
| 8162421a      | 1.26E-05 | 1.02     | down | 1.29     | up   | 1.05     | down | 1.40     | down | IPPK;CENPP         |
| 8059878a      | 5.59E-09 | 1.54     | down | 1.40     | up   | 1.32     | down | 3.65     | down | IQCA1;LOC100129258 |
| 8143899a      | 4.69E-05 | 1.18     | down | 1.42     | up   | 1.23     | down | 1.29     | down | IQCA1L             |
| 7984380a      | 8.43E-05 | 1.03     | up   | 1.07     | up   | 1.23     | up   | 1.31     | down | IQCH               |
| 7993713a      | 2.96E-06 | 1.47     | up   | 1.04     | down | 1.71     | up   | 1.05     | up   | IQCK               |
| 7986010a      | 3.48E-05 | 1.04     | up   | 1.38     | down | 1.14     | up   | 1.08     | down | IQGAP1             |
| 7921033a      | 4.18E-05 | 1.55     | down | 1.69     | down | 1.40     | down | 1.18     | up   | IQGAP3             |
| 8120826a      | 7.67E-05 | 1.04     | down | 1.63     | up   | 1.00     | up   | 1.58     | down | IRAK1BP1           |
| 7956878a      | 1.71E-08 | 3.88     | up   | 1.42     | down | 1.10     | up   | 7.52     | down | IRAK3              |
| 8136045a      | 4.62E-08 | 1.24     | up   | 1.15     | up   | 1.44     | up   | 1.13     | down | IRF5               |
| 7997712a      | 1.59E-05 | 1.21     | up   | 1.01     | up   | 1.89     | up   | 1.24     | down | IRF8               |
| 7973618a      | 2.49E-07 | 1.33     | up   | 1.41     | down | 1.20     | up   | 1.24     | up   | IRF9               |
| 8110872a      | 2.96E-06 | 1.59     | down | 1.51     | down | 1.01     | down | 2.49     | up   | IRX2               |
| 8110865a      | 3.33E-07 | 1.00     | up   | 1.04     | up   | 2.14     | up   | 1.10     | up   | IRX4               |
| 8112331a      | 2.96E-07 | 1.07     | down | 1.67     | up   | 1.17     | down | 1.31     | down | ISCA1;ISCA1L       |
| 7975705a      | 3.74E-05 | 1.27     | up   | 1.14     | down | 1.11     | up   | 1.15     | up   | ISCA2              |
| 8107814a      | 2.16E-05 | 1.47     | up   | 1.11     | up   | 1.33     | up   | 1.32     | down | ISOC1              |
| 8035465a      | 2.69E-05 | 1.03     | up   | 1.50     | up   | 2.49     | down | 2.92     | down | ISYNA1             |
| 8001211a      | 6.69E-09 | 1.14     | down | 1.79     | down | 1.10     | down | 2.32     | up   | ITFG1              |
| 8001233a      | 5.78E-06 | 1.09     | up   | 1.29     | down | 1.21     | up   | 1.82     | up   | ITFG1              |
| 7989985a      | 1.87E-06 | 1.17     | up   | 2.43     | down | 1.17     | up   | 1.11     | up   | ITGA11             |
| 8046695a      | 1.94E-06 | 3.29     | up   | 3.25     | up   | 1.08     | down | 2.72     | down | ITGA4;CERKL        |
| 7963786a      | 1.00E-09 | 1.16     | up   | 1.85     | down | 1.22     | down | 2.14     | up   | ITGA5              |
| 7963880a      | 6.34E-05 | 1.03     | down | 1.32     | up   | 2.36     | down | 1.62     | up   | ITGA7              |
| 8078619a      | 3.83E-06 | 1.05     | down | 1.26     | up   | 1.02     | up   | 1.50     | down | ITGA9              |
| 8046861a      | 5.67E-06 | 1.34     | down | 1.63     | down | 1.04     | down | 1.08     | down | ITGAV              |
| 7932966a      | 8.89E-09 | 1.32     | down | 1.38     | down | 1.37     | down | 1.30     | up   | ITGB1              |
| 8050176a      | 2.03E-05 | 1.06     | up   | 1.19     | down | 1.02     | up   | 1.33     | up   | ITGB1BP1           |
| 8070826a      | 3.48E-06 | 1.06     | down | 1.31     | up   | 1.02     | up   | 1.05     | up   | ITGB2              |
| 8007931a      | 8.19E-06 | 1.07     | down | 2.00     | down | 1.11     | down | 2.29     | up   | ITGB3              |
| 7969861a      | 5.46E-11 | 1.16     | up   | 2.90     | down | 1.19     | up   | 2.74     | up   | ITGBL1             |
| 8173106a      | 9.18E-07 | 1.18     | down | 1.23     | up   | 1.12     | down | 1.08     | up   | ITIH5L             |
| 7969003a      | 4.18E-05 | 1.02     | up   | 1.22     | down | 1.14     | down | 1.16     | up   | ITM2B              |
| 8060611a      | 3.78E-07 | 1.70     | down | 1.09     | up   | 2.02     | down | 1.00     | up   | ITPA               |
| 7980970a      | 2.44E-05 | 1.11     | up   | 1.66     | down | 1.06     | down | 1.18     | up   | ITPK1              |
| 8118734a      | 9.99E-05 | 1.20     | up   | 1.43     | up   | 1.81     | up   | 1.00     | down | ITPR3              |
| 7936242a      | 2.14E-08 | 1.08     | down | 1.61     | down | 1.12     | down | 1.69     | up   | ITPRIP             |
| 7993622a      | 6.11E-06 | 1.30     | up   | 1.13     | down | 1.39     | up   | 1.03     | down | ITPRIPL2           |
| 8050719a      | 4.67E-06 | 1.32     | up   | 1.00     | up   | 1.18     | up   | 1.22     | down | ITSN2              |
| 7922889a      | 2.21E-07 | 1.20     | down | 1.46     | down | 1.79     | down | 1.19     | up   | IVNS1ABP           |
| 8055021a      | 9.23E-08 | 1.33     | up   | 1.06     | up   | 1.20     | up   | 1.19     | down | IWS1               |
| 8064978a      | 4.28E-06 | 1.10     | down | 2.17     | down | 1.25     | up   | 2.37     | up   | JAG1               |
| 8116998a      | 6.30E-07 | 1.18     | up   | 1.17     | down | 1.17     | up   | 1.60     | up   | JARID2             |
| 8138789a      | 2.07E-05 | 1.08     | up   | 1.71     | down | 1.22     | up   | 1.90     | up   | JAZF1              |
| 7974725a      | 1.48E-06 | 1.10     | up   | 1.40     | down | 1.02     | up   | 1.26     | up   | JKAMP              |
| 8151423a      | 6.90E-08 | 1.00     | up   | 2.30     | up   | 1.03     | down | 1.06     | up   | JPH1               |
| 7943314a      | 5.68E-07 | 1.40     | down | 1.45     | up   | 1.75     | down | 1.11     | down | JRKL               |
| 7916609a      | 8.31E-05 | 1.14     | down | 1.03     | down | 1.46     | down | 1.31     | up   | JUN                |
| 8026047a      | 2.10E-07 | 1.02     | up   | 2.06     | down | 1.32     | up   | 1.40     | down | JUNB               |
| 8015412a      | 1.88E-05 | 1.25     | down | 1.76     | up   | 1.52     | down | 1.21     | down | JUP                |
| 8171248a      | 2.44E-06 | 1.02     | up   | 1.09     | down | 1.05     | up   | 1.81     | up   | KAL1               |
| 8015526a      | 8.87E-09 | 1.05     | down | 1.65     | up   | 1.04     | up   | 2.09     | down | KAT2A              |
| 8078227a      | 3.43E-07 | 1.04     | down | 2.05     | down | 1.11     | down | 1.47     | up   | KAT2B              |

| Transcript ID | p-value  | Arsenic  |      | Chromium |      | Nickel   |      | Vanadium |      | Gene Symbol            |
|---------------|----------|----------|------|----------|------|----------|------|----------|------|------------------------|
|               |          | $\Delta$ | Reg  | $\Delta$ | Reg  | $\Delta$ | Reg  | $\Delta$ | Reg  |                        |
| 7970844a      | 1.15E-05 | 1.23     | down | 1.78     | down | 1.22     | down | 1.42     | up   | KATNAL1                |
| 8043105a      | 3.99E-06 | 1.20     | up   | 1.15     | down | 1.31     | up   | 1.06     | up   | KCMF1                  |
| 7903867a      | 1.93E-06 | 1.03     | up   | 1.27     | up   | 1.43     | up   | 1.19     | down | KCNC4                  |
| 8172493a      | 1.26E-05 | 2.07     | up   | 1.05     | up   | 1.13     | down | 1.18     | down | KCND1                  |
| 8067029a      | 6.87E-06 | 1.49     | up   | 1.20     | up   | 1.94     | up   | 1.17     | up   | KCNG1                  |
| 8067033a      | 1.11E-05 | 1.48     | up   | 1.00     | down | 1.94     | up   | 1.60     | up   | KCNG1                  |
| 8051785a      | 4.91E-08 | 1.62     | up   | 1.15     | up   | 2.23     | up   | 1.30     | down | KCNG3                  |
| 7921533a      | 5.67E-05 | 1.20     | up   | 1.19     | up   | 1.33     | up   | 1.07     | down | KCNJ10                 |
| 7934570a      | 2.96E-06 | 1.71     | down | 1.71     | down | 1.50     | down | 3.69     | up   | KCNMA1                 |
| 7957126a      | 7.20E-07 | 1.56     | up   | 1.52     | up   | 1.03     | up   | 2.02     | down | KCNMB4                 |
| 8120654a      | 7.16E-11 | 2.67     | up   | 4.99     | up   | 1.05     | up   | 8.85     | down | KCNQ5                  |
| 7923043a      | 2.23E-05 | 2.32     | up   | 1.36     | up   | 1.04     | up   | 1.01     | up   | KCNT2                  |
| 8000738a      | 2.34E-08 | 1.76     | up   | 1.03     | down | 1.58     | up   | 1.07     | up   | KCTD13                 |
| 7950641a      | 1.23E-05 | 1.48     | up   | 2.31     | down | 1.33     | up   | 1.54     | up   | KCTD14                 |
| 8058118a      | 2.50E-06 | 1.29     | up   | 1.09     | down | 1.19     | up   | 1.23     | up   | KCTD18                 |
| 8009737a      | 1.73E-07 | 1.32     | up   | 1.03     | up   | 1.28     | up   | 1.09     | up   | KCTD2                  |
| 7971369a      | 4.63E-10 | 1.15     | down | 1.11     | down | 1.85     | down | 2.97     | up   | KCTD4                  |
| 8133167a      | 3.29E-05 | 1.09     | up   | 1.37     | down | 1.25     | up   | 1.13     | up   | KCTD7;RABGEF1          |
| 8149857a      | 2.15E-05 | 1.05     | down | 1.30     | down | 1.05     | down | 1.12     | up   | KCTD9                  |
| 7972682a      | 2.89E-05 | 1.65     | down | 1.46     | down | 1.58     | down | 1.15     | up   | KDELC1                 |
| 7951535a      | 2.70E-06 | 1.23     | down | 1.23     | up   | 1.32     | down | 1.09     | up   | KDELC2                 |
| 7898833a      | 6.30E-06 | 1.00     | down | 1.19     | up   | 1.11     | down | 1.05     | up   | KDM1                   |
| 8043283a      | 1.33E-05 | 1.26     | up   | 1.44     | up   | 1.40     | up   | 1.11     | down | KDM3A                  |
| 7900833a      | 3.49E-05 | 1.06     | down | 1.34     | up   | 1.02     | down | 1.08     | up   | KDM4A                  |
| 8154333a      | 1.20E-06 | 1.13     | down | 1.24     | down | 1.47     | down | 1.46     | up   | KDM4C                  |
| 7943282a      | 1.06E-07 | 1.16     | up   | 1.83     | up   | 1.15     | up   | 1.24     | down | KDM4D                  |
| 7923453a      | 2.02E-06 | 1.08     | down | 1.31     | down | 1.37     | down | 1.24     | up   | KDM5B                  |
| 8172827a      | 1.48E-06 | 1.32     | up   | 1.22     | down | 1.21     | up   | 1.09     | down | KDM5C                  |
| 8177232a      | 7.89E-08 | 1.35     | down | 4.58     | down | 1.95     | up   | 5.11     | up   | KDM5D                  |
| 8166956a      | 5.79E-05 | 1.22     | up   | 1.30     | down | 1.22     | up   | 1.18     | down | KDM6A                  |
| 8023656a      | 7.60E-06 | 1.01     | down | 1.34     | up   | 1.06     | up   | 1.36     | down | KDSR                   |
| 8161478a      | 3.99E-06 | 1.26     | up   | 1.07     | up   | 1.22     | up   | 1.33     | down | KGFLP2;KGFLP1;FLJ20444 |
| 8033162a      | 7.31E-06 | 1.15     | up   | 1.19     | up   | 1.17     | up   | 1.18     | down | KHSRP                  |
| 8013696a      | 1.98E-06 | 1.23     | up   | 1.02     | down | 1.26     | up   | 1.45     | down | KIAA0100               |
| 7997168a      | 4.83E-06 | 1.08     | up   | 1.25     | down | 1.13     | up   | 1.36     | up   | KIAA0174               |
| 8093961a      | 6.21E-05 | 1.16     | down | 1.39     | down | 1.16     | down | 1.13     | up   | KIAA0232               |
| 7980189a      | 2.91E-05 | 1.25     | up   | 1.31     | down | 1.16     | up   | 1.25     | up   | KIAA0317               |
| 8163275a      | 4.35E-05 | 1.21     | down | 1.17     | up   | 1.13     | down | 1.53     | down | KIAA0368               |
| 8021154a      | 9.51E-05 | 1.14     | down | 1.44     | down | 1.02     | down | 1.16     | up   | KIAA0427               |
| 7911854a      | 4.62E-08 | 1.10     | up   | 2.09     | up   | 1.08     | up   | 1.54     | down | KIAA0495               |
| 7997662a      | 5.03E-05 | 1.35     | up   | 1.03     | down | 1.44     | up   | 1.36     | up   | KIAA0513               |
| 7971246a      | 9.80E-07 | 1.10     | down | 1.57     | down | 1.44     | down | 1.29     | up   | KIAA0564               |
| 7939676a      | 5.24E-08 | 1.34     | up   | 1.42     | up   | 1.34     | up   | 1.41     | down | KIAA0652               |
| 8011293a      | 1.77E-07 | 1.24     | up   | 1.60     | up   | 1.04     | down | 1.28     | down | KIAA0664               |
| 8011945a      | 6.23E-06 | 1.08     | up   | 1.35     | up   | 1.17     | up   | 1.40     | down | KIAA0753               |
| 8027184a      | 8.15E-05 | 1.20     | up   | 1.24     | up   | 1.38     | up   | 1.11     | down | KIAA0892               |
| 8104350a      | 2.69E-05 | 1.15     | up   | 1.58     | up   | 1.31     | up   | 1.29     | down | KIAA0947               |
| 7902977a      | 3.70E-08 | 1.12     | up   | 1.15     | up   | 1.06     | up   | 2.65     | down | KIAA1107               |
| 7926679a      | 1.44E-08 | 1.36     | down | 1.62     | down | 2.30     | down | 3.00     | up   | KIAA1217               |
| 8122279a      | 9.88E-08 | 1.10     | up   | 2.73     | up   | 1.49     | up   | 3.05     | down | KIAA1244;LOC202451     |
| 8016266a      | 1.23E-06 | 1.01     | down | 1.39     | up   | 1.02     | up   | 1.32     | down | KIAA1267;LOC100294337  |
| 8053949a      | 2.65E-05 | 1.37     | up   | 1.18     | up   | 1.17     | up   | 1.06     | up   | KIAA1310               |
| 8140709a      | 2.15E-06 | 1.38     | up   | 2.59     | up   | 1.01     | up   | 1.20     | up   | KIAA1324L              |

| Transcript ID | Arsenic  |          |      | Chromium |      | Nickel   |      | Vanadium |      | Gene Symbol           |
|---------------|----------|----------|------|----------|------|----------|------|----------|------|-----------------------|
|               | p-value  | $\Delta$ | Reg  | $\Delta$ | Reg  | $\Delta$ | Reg  | $\Delta$ | Reg  |                       |
| 7910589a      | 2.88E-06 | 1.39     | up   | 1.38     | down | 1.24     | down | 1.48     | up   | KIAA1383              |
| 7899821a      | 7.89E-06 | 1.01     | up   | 1.45     | down | 1.08     | up   | 1.04     | down | KIAA1522              |
| 8160981a      | 1.47E-07 | 1.21     | up   | 1.58     | down | 1.06     | up   | 1.57     | up   | KIAA1539              |
| 8143247a      | 9.40E-07 | 1.27     | up   | 1.58     | up   | 1.19     | up   | 1.40     | down | KIAA1549              |
| 8003158a      | 2.66E-05 | 1.25     | up   | 1.72     | up   | 1.31     | up   | 1.10     | down | KIAA1609              |
| 8010426a      | 4.03E-06 | 1.33     | up   | 1.17     | down | 1.63     | up   | 1.20     | down | KIAA1618              |
| 8076668a      | 5.79E-06 | 1.08     | up   | 1.24     | down | 2.26     | up   | 1.15     | up   | KIAA1644              |
| 7968898a      | 8.16E-05 | 1.00     | up   | 1.34     | down | 1.26     | down | 1.20     | up   | KIAA1704              |
| 7943126a      | 1.42E-06 | 1.13     | down | 1.46     | up   | 1.16     | down | 1.37     | down | KIAA1731              |
| 7910600a      | 1.56E-05 | 1.45     | up   | 1.71     | up   | 1.32     | up   | 1.60     | down | KIAA1804              |
| 7951422a      | 1.79E-05 | 1.08     | down | 1.42     | up   | 1.32     | down | 1.47     | down | KIAA1826              |
| 8121525a      | 9.56E-05 | 1.08     | down | 1.22     | up   | 1.02     | up   | 1.17     | down | KIAA1919              |
| 7990941a      | 7.83E-05 | 1.58     | down | 1.08     | down | 1.78     | down | 1.06     | up   | KIAA1920;LOC100291610 |
| 8124798a      | 6.82E-05 | 1.35     | up   | 1.06     | down | 1.37     | up   | 1.09     | up   | KIAA1949              |
| 8157246a      | 3.47E-05 | 1.12     | up   | 1.29     | up   | 1.14     | down | 1.66     | down | KIAA1958              |
| 8050128a      | 4.06E-09 | 1.28     | up   | 1.56     | down | 1.34     | up   | 1.28     | up   | KIDINS220             |
| 8124088a      | 2.53E-07 | 1.25     | up   | 1.06     | down | 1.30     | up   | 1.55     | up   | KIF13A                |
| 7947248a      | 3.76E-05 | 1.03     | down | 1.36     | up   | 1.02     | up   | 1.17     | down | KIF18A                |
| 8016139a      | 2.11E-08 | 1.03     | down | 1.59     | up   | 1.21     | up   | 1.65     | down | KIF18B                |
| 8016147a      | 1.54E-08 | 1.01     | down | 1.66     | up   | 1.15     | up   | 1.76     | down | KIF18B                |
| 7929078a      | 4.67E-08 | 1.66     | down | 1.12     | up   | 1.60     | down | 1.54     | down | KIF20B                |
| 8162019a      | 9.50E-07 | 1.06     | down | 1.50     | up   | 1.12     | up   | 1.98     | down | KIF27;LOC389765       |
| 8105523a      | 4.39E-09 | 1.52     | down | 1.25     | down | 1.22     | down | 1.43     | up   | KIF2A                 |
| 7901010a      | 8.97E-05 | 1.06     | down | 1.39     | up   | 1.14     | down | 1.06     | down | KIF2C                 |
| 8114030a      | 2.24E-07 | 1.25     | down | 1.35     | up   | 1.03     | up   | 1.73     | down | KIF3A                 |
| 8061715a      | 2.07E-06 | 1.06     | up   | 1.09     | down | 1.29     | up   | 1.01     | down | KIF3B                 |
| 8050894a      | 1.44E-05 | 1.16     | up   | 1.31     | down | 1.27     | up   | 1.19     | up   | KIF3C                 |
| 8045637a      | 3.54E-09 | 3.48     | up   | 3.91     | up   | 3.68     | up   | 4.78     | down | KIF5C                 |
| 7922268a      | 3.48E-05 | 1.25     | down | 1.65     | down | 1.60     | down | 1.05     | up   | KIFAP3                |
| 8179564a      | 1.62E-05 | 1.14     | up   | 1.15     | up   | 1.38     | up   | 1.06     | down | KIFC1                 |
| 8001587a      | 4.10E-06 | 1.06     | up   | 1.28     | down | 1.31     | up   | 1.51     | up   | KIFC3                 |
| 7906307a      | 4.67E-07 | 1.01     | down | 1.40     | down | 1.04     | down | 1.32     | up   | KIRREL                |
| 8095110a      | 1.76E-07 | 1.08     | down | 3.71     | up   | 3.67     | down | 3.38     | up   | KIT                   |
| 7965322a      | 1.29E-06 | 1.01     | down | 1.94     | down | 1.73     | down | 1.96     | up   | KITLG                 |
| 8040211a      | 1.38E-07 | 1.13     | down | 1.83     | down | 1.56     | up   | 1.75     | up   | KLF11                 |
| 8026564a      | 6.63E-07 | 1.24     | down | 1.05     | down | 1.25     | down | 1.44     | up   | KLF2                  |
| 7931810a      | 1.88E-08 | 1.32     | down | 1.98     | down | 1.29     | down | 1.38     | up   | KLF6                  |
| 8058477a      | 8.46E-06 | 1.16     | up   | 1.49     | down | 1.41     | up   | 1.21     | up   | KLF7                  |
| 7954604a      | 1.47E-05 | 1.18     | down | 1.45     | down | 1.00     | up   | 1.38     | up   | KLHDC5                |
| 8015456a      | 2.06E-08 | 1.18     | down | 1.71     | up   | 1.23     | down | 1.91     | down | KLHL11                |
| 8171837a      | 4.39E-07 | 1.04     | up   | 1.51     | up   | 1.09     | down | 1.21     | down | KLHL15                |
| 7912102a      | 6.62E-07 | 1.05     | down | 1.35     | up   | 1.16     | down | 1.11     | up   | KLHL21                |
| 8046186a      | 4.34E-09 | 1.18     | up   | 1.68     | up   | 1.29     | up   | 2.05     | down | KLHL23;PHOSPHO2       |
| 8027049a      | 1.41E-05 | 1.10     | up   | 1.30     | up   | 1.25     | up   | 1.03     | down | KLHL26                |
| 7950492a      | 3.72E-06 | 1.17     | down | 1.07     | up   | 1.37     | down | 1.24     | up   | KLHL35                |
| 7997626a      | 1.22E-08 | 1.31     | up   | 1.39     | up   | 1.72     | up   | 1.15     | down | KLHL36                |
| 8168622a      | 1.04E-08 | 1.03     | down | 5.82     | down | 1.47     | down | 1.66     | up   | KLHL4                 |
| 8094625a      | 3.65E-08 | 1.03     | up   | 2.38     | down | 1.07     | up   | 1.36     | up   | KLHL5                 |
| 7959408a      | 9.32E-05 | 1.33     | down | 1.42     | down | 1.01     | up   | 1.05     | down | KNTC1                 |
| 8072170a      | 1.12E-07 | 1.47     | up   | 1.06     | up   | 2.22     | up   | 1.11     | down | KREMEN1               |
| 8015104a      | 3.65E-07 | 1.09     | down | 1.18     | up   | 1.10     | down | 1.34     | down | KRT10                 |
| 8005449a      | 1.74E-08 | 4.76     | down | 1.00     | up   | 4.91     | down | 1.85     | up   | KRT17                 |
| 8013042a      | 7.52E-08 | 3.08     | down | 1.10     | down | 3.70     | down | 1.97     | up   | KRT17                 |

| Transcript ID | p-value  | Arsenic |      | Chromium |      | Nickel |      | Vanadium |      | Gene Symbol           |
|---------------|----------|---------|------|----------|------|--------|------|----------|------|-----------------------|
|               |          | Δ       | Reg  | Δ        | Reg  | Δ      | Reg  | Δ        | Reg  |                       |
| 8015387a      | 9.98E-08 | 5.56    | down | 1.28     | down | 7.06   | down | 2.71     | up   | KRT17                 |
| 7955637a      | 7.46E-06 | 1.04    | up   | 1.35     | up   | 1.26   | up   | 1.12     | down | KRT18                 |
| 7969574a      | 3.95E-06 | 1.19    | up   | 1.46     | up   | 1.49   | up   | 1.18     | down | KRT18                 |
| 8154725a      | 1.99E-06 | 1.15    | up   | 1.44     | up   | 1.48   | up   | 1.15     | down | KRT18                 |
| 7963479a      | 1.89E-05 | 1.09    | up   | 1.04     | up   | 1.11   | up   | 1.20     | down | KRT2                  |
| 8015257a      | 3.65E-07 | 1.34    | down | 1.49     | up   | 1.18   | down | 1.04     | up   | KRT33A                |
| 8015262a      | 4.66E-06 | 1.19    | down | 1.97     | up   | 1.07   | down | 1.02     | up   | KRT33B                |
| 8015268a      | 1.70E-05 | 1.13    | down | 4.38     | up   | 1.09   | down | 1.62     | up   | KRT34                 |
| 7963406a      | 6.51E-06 | 1.19    | down | 1.46     | up   | 1.10   | down | 1.06     | down | KRT6B                 |
| 7963567a      | 1.99E-06 | 1.15    | up   | 1.37     | up   | 1.32   | up   | 1.14     | down | KRT8                  |
| 8019588a      | 8.56E-08 | 1.10    | down | 1.42     | up   | 1.05   | down | 1.25     | up   | KRTAP1-1/3/5          |
| 8015208a      | 3.87E-05 | 1.10    | down | 1.76     | up   | 1.03   | down | 1.10     | up   | KRTAP2-1/2/4          |
| 8019576a      | 6.20E-05 | 1.29    | down | 2.34     | up   | 1.32   | down | 1.35     | down | KRTAP2-1/2/4          |
| 8019699a      | 1.63E-06 | 1.02    | up   | 1.55     | up   | 1.01   | up   | 1.08     | down | KRTAP4-8/11/7         |
| 8019565a      | 5.01E-07 | 1.07    | down | 1.89     | up   | 1.05   | down | 1.18     | down | KRTAP4-2/5/11/12      |
| 8015242a      | 9.90E-05 | 1.03    | up   | 1.39     | up   | 1.02   | up   | 1.10     | down | KRTAP4-2;KRTAP4-1     |
| 8007115a      | 8.87E-06 | 1.10    | down | 1.63     | up   | 1.01   | up   | 1.13     | down | KRTAP4-7-9;KRTAP4-11  |
| 8007134a      | 2.19E-05 | 1.11    | down | 1.12     | up   | 1.09   | down | 1.06     | up   | KRTAP9-2-4;KRTAP9-8/9 |
| 8175871a      | 2.08E-07 | 1.22    | down | 3.94     | up   | 1.01   | up   | 2.02     | up   | L1CAM                 |
| 7984103a      | 3.07E-06 | 1.07    | up   | 1.60     | down | 1.07   | down | 1.21     | up   | LACTB                 |
| 8176093a      | 2.20E-08 | 1.29    | up   | 1.78     | down | 1.11   | up   | 1.46     | up   | LAGE3                 |
| 8022176a      | 4.61E-06 | 1.75    | up   | 1.35     | up   | 1.39   | up   | 2.04     | down | LAMA1                 |
| 8128991a      | 3.11E-05 | 2.32    | up   | 1.75     | down | 2.61   | up   | 1.53     | down | LAMA4                 |
| 8142194a      | 2.19E-07 | 1.05    | down | 2.05     | down | 1.06   | up   | 2.14     | up   | LAMB1                 |
| 8087337a      | 4.04E-05 | 1.39    | down | 1.01     | up   | 1.36   | down | 1.31     | up   | LAMB2                 |
| 7924029a      | 2.20E-06 | 1.22    | down | 1.63     | up   | 1.97   | down | 2.63     | up   | LAMB3                 |
| 7908041a      | 6.61E-09 | 1.24    | down | 1.63     | down | 1.57   | down | 1.65     | up   | LAMC1                 |
| 7908072a      | 2.47E-11 | 1.42    | down | 4.55     | down | 2.43   | down | 3.75     | up   | LAMC2                 |
| 8092348a      | 1.25E-05 | 1.56    | up   | 1.32     | up   | 2.25   | up   | 1.92     | down | LAMP3                 |
| 8075637a      | 5.05E-06 | 2.05    | down | 1.48     | up   | 1.26   | down | 1.23     | down | LARGE                 |
| 7955361a      | 1.81E-06 | 1.16    | up   | 1.12     | up   | 1.32   | up   | 1.15     | down | LARP4                 |
| 7990080a      | 9.77E-05 | 1.05    | up   | 1.44     | down | 1.06   | down | 1.19     | up   | LARP6                 |
| 8114861a      | 1.02E-05 | 1.44    | down | 1.13     | up   | 1.27   | down | 1.14     | down | LARS                  |
| 8173269a      | 3.37E-05 | 1.03    | up   | 1.27     | down | 1.01   | up   | 1.38     | down | LAS1L                 |
| 8025382a      | 1.88E-08 | 1.28    | up   | 1.66     | up   | 1.47   | up   | 1.35     | down | LASS4                 |
| 7924603a      | 2.77E-06 | 1.23    | down | 1.20     | down | 1.64   | down | 1.44     | up   | LBR                   |
| 8053183a      | 8.76E-06 | 1.39    | up   | 1.03     | up   | 1.29   | up   | 1.08     | up   | LBX2                  |
| 8070398a      | 4.64E-05 | 1.02    | up   | 1.08     | up   | 1.05   | down | 1.31     | down | LCA5L;WRB             |
| 8041212a      | 1.33E-05 | 1.12    | up   | 1.46     | up   | 1.08   | up   | 1.19     | down | LCLAT1                |
| 7929596a      | 2.86E-08 | 1.23    | down | 1.11     | up   | 1.42   | down | 1.09     | down | LCOR                  |
| 8099524a      | 8.81E-07 | 1.17    | up   | 1.14     | down | 1.15   | up   | 1.51     | up   | LDB2                  |
| 8175539a      | 1.42E-06 | 1.01    | down | 1.79     | down | 1.04   | down | 1.95     | up   | LDOC1                 |
| 8145942a      | 2.72E-05 | 1.18    | up   | 1.52     | down | 1.13   | down | 1.64     | up   | LETM2                 |
| 8072876a      | 7.57E-08 | 1.03    | down | 1.28     | down | 1.01   | down | 1.32     | up   | LGALS1                |
| 7974461a      | 1.35E-07 | 1.06    | up   | 1.48     | down | 1.00   | down | 1.50     | up   | LGALS3                |
| 8018975a      | 2.34E-06 | 1.22    | up   | 1.23     | down | 1.21   | up   | 1.27     | up   | LGALS3BP              |
| 7947199a      | 6.80E-06 | 1.19    | up   | 1.07     | up   | 1.09   | up   | 3.76     | up   | LGR4                  |
| 7971150a      | 7.66E-08 | 1.01    | down | 1.67     | down | 1.43   | down | 1.60     | up   | LHFP                  |
| 8112803a      | 1.70E-08 | 1.01    | up   | 1.28     | down | 1.01   | up   | 1.98     | up   | LHFPL2                |
| 8157751a      | 4.63E-07 | 1.27    | up   | 1.02     | up   | 2.18   | up   | 1.18     | down | LHX2                  |
| 7907849a      | 8.83E-05 | 1.21    | down | 1.23     | up   | 1.10   | down | 1.14     | down | LHX4                  |
| 7908529a      | 4.63E-07 | 1.31    | up   | 1.25     | up   | 1.46   | up   | 2.04     | down | LHX9                  |
| 8094688a      | 3.26E-05 | 1.05    | up   | 1.31     | down | 1.22   | down | 1.52     | up   | LIAS                  |

| Transcript ID | p-value  | Arsenic  |      | Chromium |      | Nickel   |      | Vanadium |      | Gene Symbol         |
|---------------|----------|----------|------|----------|------|----------|------|----------|------|---------------------|
|               |          | $\Delta$ | Reg  | $\Delta$ | Reg  | $\Delta$ | Reg  | $\Delta$ | Reg  |                     |
| 8111677a      | 2.48E-07 | 1.76     | up   | 1.15     | up   | 1.64     | up   | 1.27     | down | LIFR                |
| 8006479a      | 7.64E-09 | 1.23     | up   | 1.49     | up   | 1.32     | up   | 1.99     | down | LIG3                |
| 7972737a      | 2.09E-05 | 1.19     | down | 1.41     | up   | 1.33     | down | 1.39     | down | LIG4                |
| 7934920a      | 3.49E-05 | 1.25     | down | 1.17     | up   | 1.22     | down | 1.20     | up   | LIPA                |
| 8037186a      | 4.95E-05 | 1.31     | down | 1.36     | up   | 1.33     | down | 1.23     | down | LIPE                |
| 8092541a      | 4.22E-07 | 6.30     | up   | 1.00     | up   | 3.61     | up   | 1.04     | down | LIPH                |
| 8043840a      | 3.90E-06 | 1.37     | up   | 1.15     | up   | 1.29     | up   | 1.14     | down | LIPT1;MITD1         |
| 8009844a      | 3.14E-05 | 1.16     | up   | 1.35     | up   | 1.51     | up   | 1.30     | down | LLGL2               |
| 8023561a      | 3.53E-06 | 1.04     | down | 1.34     | up   | 1.11     | down | 1.37     | down | LMAN1               |
| 8144089a      | 1.45E-06 | 1.45     | down | 1.02     | down | 1.59     | down | 1.03     | up   | LMBR1               |
| 8077490a      | 4.81E-07 | 1.09     | down | 2.19     | down | 1.21     | down | 1.63     | up   | LMCD1               |
| 7998381a      | 1.04E-05 | 1.30     | down | 1.16     | up   | 1.13     | down | 2.05     | down | LMF1                |
| 7969438a      | 1.97E-05 | 1.00     | up   | 1.27     | down | 1.22     | up   | 1.39     | up   | LMO7                |
| 8157922a      | 1.75E-06 | 1.06     | up   | 1.01     | down | 1.53     | up   | 1.04     | down | LMX1B               |
| 8107066a      | 7.80E-06 | 1.37     | down | 1.86     | down | 1.13     | up   | 1.22     | up   | LNPEP               |
| 7970716a      | 6.21E-07 | 1.04     | down | 1.50     | down | 1.02     | up   | 1.35     | up   | LNX2                |
| 8036302a      | 6.53E-08 | 1.54     | down | 1.81     | up   | 1.26     | down | 1.78     | down | LOC100127980        |
| 8131098a      | 1.07E-05 | 1.02     | down | 1.28     | up   | 1.05     | up   | 1.06     | up   | LOC100128374        |
| 8135585a      | 1.02E-07 | 1.64     | down | 1.88     | down | 2.18     | down | 2.73     | up   | LOC100128868        |
| 8156194a      | 1.52E-05 | 1.06     | down | 1.24     | up   | 1.12     | down | 1.13     | down | LOC100130433        |
| 8015798a      | 4.15E-06 | 1.33     | up   | 1.04     | down | 1.40     | up   | 1.51     | down | LOC100130581        |
| 8155503a      | 1.32E-07 | 1.20     | down | 2.13     | down | 2.09     | down | 2.04     | up   | LOC100132167        |
| 8161368a      | 3.10E-06 | 1.07     | down | 1.92     | down | 1.56     | down | 1.39     | up   | LOC100132167        |
| 7927550a      | 9.22E-07 | 1.45     | down | 1.04     | up   | 1.47     | down | 1.40     | down | LOC100133130        |
| 8010012a      | 5.58E-05 | 1.07     | down | 1.31     | down | 1.02     | down | 1.28     | up   | LOC100134934;CDK3   |
| 7981488a      | 9.06E-05 | 1.16     | down | 1.24     | up   | 1.08     | down | 1.07     | up   | LOC100288144        |
| 8154727a      | 1.06E-08 | 1.36     | up   | 1.66     | up   | 1.87     | up   | 1.59     | down | LOC138412           |
| 8054517a      | 3.72E-05 | 1.08     | down | 1.26     | up   | 1.35     | down | 1.84     | down | LOC151009;LOC440894 |
| 8116128a      | 8.25E-08 | 1.17     | down | 1.47     | up   | 1.11     | up   | 1.50     | down | LOC202181           |
| 8110685a      | 1.63E-05 | 1.22     | up   | 1.42     | up   | 1.39     | up   | 1.15     | up   | LOC25845;EXOC3      |
| 7957606a      | 3.16E-06 | 1.26     | down | 1.17     | down | 1.38     | down | 1.24     | up   | LOC283398           |
| 8012282a      | 6.07E-06 | 1.03     | down | 1.76     | up   | 1.07     | down | 1.30     | down | LOC284023           |
| 8004955a      | 6.39E-05 | 1.14     | down | 1.19     | up   | 1.25     | down | 1.16     | up   | LOC284033           |
| 8021374a      | 6.78E-05 | 1.21     | up   | 1.04     | down | 1.18     | up   | 1.20     | down | LOC284288           |
| 8043583a      | 7.67E-05 | 1.20     | up   | 1.14     | down | 1.26     | up   | 1.34     | up   | LOC285033           |
| 8094226a      | 1.97E-05 | 1.07     | down | 1.66     | down | 1.20     | down | 1.08     | up   | LOC285550           |
| 7959921a      | 2.99E-05 | 1.05     | down | 1.29     | up   | 1.01     | up   | 1.08     | down | LOC338797           |
| 8019754a      | 8.45E-05 | 1.05     | up   | 1.35     | down | 1.04     | down | 1.19     | up   | LOC348262           |
| 8099084a      | 1.37E-05 | 1.02     | down | 1.14     | up   | 1.10     | down | 1.06     | up   | LOC348926           |
| 8056968a      | 2.12E-09 | 1.02     | up   | 1.02     | up   | 1.77     | up   | 3.14     | up   | LOC375295           |
| 7950420a      | 5.17E-05 | 1.17     | up   | 1.20     | up   | 1.02     | up   | 1.29     | down | LOC387787           |
| 8094456a      | 8.39E-06 | 1.01     | up   | 1.41     | down | 1.10     | down | 1.11     | up   | LOC389203           |
| 8163714a      | 5.56E-06 | 1.28     | down | 1.30     | down | 1.50     | down | 1.25     | up   | LOC389787           |
| 8174026a      | 7.69E-06 | 1.12     | up   | 1.22     | down | 1.09     | up   | 1.27     | up   | LOC392510           |
| 7999447a      | 7.97E-06 | 1.04     | down | 1.34     | up   | 1.06     | up   | 1.08     | down | LOC400499           |
| 8094701a      | 7.14E-05 | 1.06     | down | 1.28     | up   | 1.07     | up   | 1.24     | down | LOC401127           |
| 7941059a      | 9.11E-05 | 1.21     | up   | 1.02     | up   | 1.22     | up   | 1.09     | down | LOC439914           |
| 7993108a      | 2.69E-05 | 1.12     | down | 1.39     | up   | 1.00     | up   | 1.06     | down | LOC440337           |
| 8155634a      | 6.12E-06 | 1.04     | down | 1.20     | up   | 1.01     | down | 1.30     | down | LOC441666           |
| 7982529a      | 4.91E-06 | 1.09     | down | 1.49     | up   | 1.13     | down | 1.20     | down | LOC441722           |
| 8160431a      | 6.51E-10 | 1.23     | up   | 3.38     | down | 1.99     | down | 4.25     | up   | LOC554202           |
| 8168412a      | 2.58E-05 | 1.11     | up   | 1.62     | down | 1.10     | up   | 1.61     | down | LOC554203           |
| 8161451a      | 7.15E-09 | 1.36     | up   | 1.16     | up   | 1.48     | up   | 1.39     | down | LOC554249;MGC21881  |

| Transcript ID | p-value  | Arsenic  |      | Chromium |      | Nickel   |      | Vanadium |      | Gene Symbol              |
|---------------|----------|----------|------|----------|------|----------|------|----------|------|--------------------------|
|               |          | $\Delta$ | Reg  | $\Delta$ | Reg  | $\Delta$ | Reg  | $\Delta$ | Reg  |                          |
| 8112306a      | 1.48E-06 | 1.10     | down | 1.06     | down | 1.53     | down | 1.65     | up   | LOC57399                 |
| 7896759a      | 1.26E-05 | 1.55     | up   | 1.12     | up   | 1.27     | up   | 1.20     | down | LOC643837                |
| 7983132a      | 3.24E-05 | 1.01     | up   | 1.55     | down | 1.01     | up   | 1.08     | down | LOC645106                |
| 7988283a      | 1.62E-08 | 1.34     | up   | 1.33     | down | 1.26     | up   | 1.32     | down | LOC645212                |
| 7986603a      | 6.53E-08 | 1.00     | down | 1.27     | up   | 1.08     | up   | 1.30     | down | LOC646214                |
| 8111922a      | 5.72E-06 | 1.44     | up   | 1.19     | up   | 1.67     | up   | 1.14     | down | LOC648987                |
| 7960889a      | 4.37E-07 | 1.05     | up   | 1.57     | up   | 1.14     | down | 1.30     | up   | LOC653113                |
| 8074925a      | 1.37E-05 | 1.23     | down | 1.51     | down | 1.12     | down | 1.24     | up   | LOC91316;GUSB;GUSBL1     |
| 8077499a      | 2.51E-07 | 1.13     | down | 2.03     | down | 1.14     | down | 1.53     | up   | LOH3CR2A                 |
| 7995421a      | 2.88E-06 | 1.16     | up   | 1.25     | down | 1.24     | up   | 1.48     | up   | LONP2                    |
| 8169603a      | 5.52E-05 | 1.33     | up   | 1.10     | up   | 1.15     | up   | 1.06     | down | LONRF3                   |
| 8113709a      | 1.51E-07 | 1.15     | up   | 1.16     | up   | 4.25     | down | 2.15     | up   | LOX                      |
| 7984771a      | 2.49E-07 | 1.23     | down | 2.00     | down | 1.50     | down | 1.99     | up   | LOXL1                    |
| 8149774a      | 1.24E-08 | 1.23     | down | 1.32     | down | 1.08     | up   | 2.21     | up   | LOXL2                    |
| 7971565a      | 2.22E-09 | 1.07     | up   | 2.31     | down | 1.10     | down | 1.34     | up   | LPAR6                    |
| 8110841a      | 5.78E-08 | 1.94     | up   | 1.41     | up   | 1.97     | up   | 1.73     | down | LPCAT1                   |
| 7995697a      | 4.52E-08 | 1.04     | up   | 2.57     | down | 1.14     | up   | 2.19     | up   | LPCAT2                   |
| 7902565a      | 1.98E-05 | 1.87     | up   | 3.89     | down | 2.59     | down | 11.85    | up   | LPHN2                    |
| 8040340a      | 1.06E-08 | 1.47     | up   | 1.63     | down | 1.44     | up   | 1.42     | up   | LPIN1                    |
| 7948332a      | 1.74E-06 | 2.39     | up   | 2.04     | down | 1.04     | down | 1.57     | up   | LPXN                     |
| 7964602a      | 3.36E-06 | 1.18     | up   | 1.63     | down | 1.58     | up   | 1.44     | up   | LRIG3                    |
| 7956301a      | 5.10E-07 | 1.16     | down | 1.71     | down | 1.38     | down | 2.04     | up   | LRP1                     |
| 7973352a      | 8.32E-06 | 1.17     | up   | 1.35     | down | 1.05     | up   | 1.33     | up   | LRP10                    |
| 8152280a      | 8.42E-05 | 1.03     | down | 1.54     | down | 1.61     | down | 1.29     | up   | LRP12                    |
| 8051882a      | 9.22E-05 | 1.09     | down | 1.17     | up   | 1.07     | down | 1.13     | down | LRPPRC                   |
| 8148923a      | 2.15E-06 | 1.16     | down | 1.49     | down | 1.07     | down | 1.25     | up   | LRRC14                   |
| 8117243a      | 4.25E-06 | 1.92     | up   | 1.21     | down | 3.05     | up   | 1.12     | up   | LRRC16A                  |
| 7986394a      | 3.31E-05 | 1.00     | up   | 1.70     | down | 1.00     | up   | 1.16     | up   | LRRC28                   |
| 8092009a      | 4.64E-10 | 1.06     | down | 1.11     | up   | 1.06     | down | 2.07     | down | LRRC34                   |
| 8007867a      | 5.82E-05 | 1.15     | down | 1.42     | up   | 1.20     | down | 1.66     | down | LRRC37A2-4               |
| 8017688a      | 6.43E-07 | 1.12     | down | 1.34     | up   | 1.03     | up   | 1.45     | down | LRRC37A2-4               |
| 8016245a      | 4.25E-06 | 1.18     | down | 1.27     | up   | 1.14     | up   | 1.57     | down | LRRC37A2-4               |
| 8142765a      | 3.07E-07 | 1.06     | down | 1.40     | up   | 1.24     | down | 1.07     | down | LRRC4                    |
| 7911862a      | 4.12E-06 | 1.18     | up   | 1.36     | up   | 1.06     | up   | 1.04     | down | LRRC47                   |
| 7987916a      | 1.88E-05 | 1.02     | down | 1.38     | down | 1.03     | down | 1.10     | up   | LRRC57                   |
| 8137215a      | 1.51E-06 | 1.37     | up   | 1.25     | up   | 1.41     | down | 1.61     | down | LRRC61                   |
| 8049512a      | 8.00E-05 | 1.36     | up   | 1.08     | down | 1.37     | up   | 1.06     | up   | LRRFIP1                  |
| 8049530a      | 8.30E-05 | 1.20     | up   | 1.25     | down | 1.16     | up   | 1.27     | down | LRRFIP1                  |
| 8086150a      | 5.28E-07 | 1.34     | down | 1.25     | down | 1.47     | down | 1.04     | up   | LRRFIP2                  |
| 7986463a      | 2.35E-06 | 1.38     | up   | 1.17     | up   | 2.36     | up   | 1.57     | down | LRRK1                    |
| 8092905a      | 3.86E-05 | 1.17     | up   | 1.26     | up   | 1.21     | up   | 1.29     | down | LSG1                     |
| 8150206a      | 3.03E-08 | 1.02     | down | 1.56     | up   | 1.06     | down | 1.42     | down | LSM12                    |
| 8027592a      | 1.26E-05 | 1.10     | down | 1.12     | up   | 1.20     | down | 1.30     | down | LSM14A                   |
| 8179839a      | 3.03E-06 | 1.28     | up   | 1.09     | up   | 1.42     | up   | 1.01     | up   | LSM2                     |
| 8097679a      | 6.84E-07 | 1.17     | down | 1.33     | down | 1.23     | down | 1.22     | up   | LSM6                     |
| 8012274a      | 2.42E-05 | 1.17     | up   | 1.12     | up   | 1.17     | up   | 1.32     | down | LSMD1                    |
| 7968126a      | 1.78E-07 | 1.23     | down | 1.80     | up   | 1.53     | down | 1.01     | down | LSP1                     |
| 7905028a      | 1.16E-06 | 1.10     | down | 1.80     | up   | 1.52     | down | 1.19     | down | LSP1;LOC645166;LOC654342 |
| 7965627a      | 4.43E-07 | 1.20     | down | 1.19     | up   | 1.22     | down | 1.06     | up   | LTA4H                    |
| 8041383a      | 7.24E-06 | 1.07     | down | 1.27     | up   | 1.05     | up   | 2.04     | up   | LTBP1                    |
| 7980152a      | 2.32E-08 | 1.36     | down | 2.44     | down | 1.72     | down | 1.67     | up   | LTBP2                    |
| 8091715a      | 7.09E-05 | 1.30     | up   | 1.40     | down | 1.33     | up   | 1.29     | up   | LXN                      |
| 8178059a      | 1.14E-07 | 1.75     | up   | 1.54     | up   | 1.78     | up   | 1.28     | down | LY6G5B;CSNK2B            |

| Transcript ID | Arsenic  |          |      | Chromium |      | Nickel   |      | Vanadium |      | Gene Symbol   |
|---------------|----------|----------|------|----------|------|----------|------|----------|------|---------------|
|               | p-value  | $\Delta$ | Reg  | $\Delta$ | Reg  | $\Delta$ | Reg  | $\Delta$ | Reg  |               |
| 8148553a      | 2.74E-06 | 1.18     | down | 1.04     | down | 1.17     | down | 2.24     | up   | LY6K          |
| 8056113a      | 4.99E-07 | 1.38     | up   | 1.88     | down | 1.08     | up   | 1.04     | up   | LY75;CD302    |
| 8146500a      | 2.56E-06 | 1.37     | up   | 1.76     | up   | 1.52     | up   | 1.50     | down | LYN           |
| 8045674a      | 2.93E-08 | 3.46     | up   | 3.40     | up   | 5.12     | up   | 2.20     | down | LYPD6         |
| 8045664a      | 7.52E-08 | 3.43     | up   | 8.17     | up   | 7.09     | up   | 2.15     | down | LYPD6B        |
| 8125748a      | 2.48E-07 | 1.03     | down | 1.04     | up   | 1.16     | down | 1.42     | up   | LYPLA2P1      |
| 8128133a      | 4.69E-06 | 1.09     | up   | 1.03     | up   | 1.23     | up   | 1.18     | down | LYRM2;ZC3H11A |
| 8123728a      | 2.70E-07 | 1.29     | up   | 1.34     | up   | 1.43     | up   | 1.20     | down | LYRM4         |
| 8113064a      | 8.27E-06 | 1.08     | up   | 1.45     | down | 1.23     | up   | 1.53     | up   | LYSMD3        |
| 7912292a      | 8.64E-06 | 1.03     | down | 1.26     | up   | 1.22     | down | 1.12     | up   | LZIC          |
| 8061035a      | 9.46E-06 | 1.28     | down | 1.01     | down | 1.31     | down | 1.20     | up   | MACROD2       |
| 8119874a      | 2.18E-05 | 1.26     | up   | 1.02     | up   | 1.24     | up   | 1.00     | down | MAD2L1BP      |
| 7912481a      | 3.64E-06 | 1.06     | up   | 1.38     | up   | 1.24     | up   | 1.12     | down | MAD2L2        |
| 8019796a      | 2.84E-05 | 1.01     | down | 1.18     | down | 1.25     | up   | 1.09     | down | MAFG          |
| 8131091a      | 3.41E-06 | 1.12     | up   | 1.27     | down | 1.19     | up   | 1.13     | up   | MAFK;TMEM184A |
| 8167656a      | 4.18E-06 | 1.39     | up   | 1.19     | down | 1.07     | up   | 1.27     | up   | MAGED1        |
| 8167815a      | 4.46E-08 | 1.47     | up   | 1.28     | down | 1.22     | up   | 1.04     | down | MAGED2        |
| 8168458a      | 1.35E-05 | 1.01     | down | 1.79     | up   | 1.17     | up   | 1.17     | down | MAGEE1        |
| 8088602a      | 1.23E-05 | 1.12     | down | 1.10     | down | 1.60     | down | 1.14     | up   | MAGI1         |
| 8140504a      | 4.71E-05 | 1.11     | up   | 1.15     | down | 1.13     | up   | 1.35     | up   | MAGI2         |
| 7904106a      | 5.99E-05 | 1.23     | down | 1.32     | down | 1.69     | down | 1.42     | up   | MAGI3         |
| 8156167a      | 5.08E-05 | 1.09     | down | 1.33     | up   | 1.07     | down | 1.50     | down | MAK10         |
| 8148040a      | 1.58E-07 | 1.34     | up   | 4.86     | up   | 1.98     | up   | 14.73    | down | MAL2          |
| 7941272a      | 4.35E-05 | 1.13     | down | 1.17     | up   | 1.10     | down | 1.15     | down | MALAT1        |
| 8170420a      | 9.29E-10 | 1.63     | down | 1.91     | down | 2.05     | down | 3.45     | up   | MAMLD1        |
| 8129254a      | 4.93E-07 | 3.87     | up   | 3.08     | up   | 1.08     | down | 1.09     | up   | MAN1A1        |
| 7904340a      | 7.39E-05 | 1.20     | down | 1.03     | up   | 1.41     | down | 1.00     | down | MAN1A2        |
| 8107234a      | 2.14E-05 | 1.31     | down | 1.10     | up   | 1.60     | down | 1.00     | down | MAN2A1        |
| 7961365a      | 8.51E-05 | 1.19     | down | 2.34     | down | 1.11     | down | 1.87     | down | MANSC1        |
| 8106098a      | 1.68E-08 | 1.10     | down | 1.68     | down | 1.02     | down | 1.59     | up   | MAP1B         |
| 8046360a      | 9.98E-05 | 1.30     | up   | 1.29     | up   | 1.29     | up   | 1.38     | down | MAP1D         |
| 7997740a      | 6.87E-06 | 1.21     | up   | 1.59     | up   | 1.44     | up   | 1.22     | down | MAP1LC3B      |
| 7959023a      | 1.85E-05 | 1.36     | up   | 1.63     | up   | 1.47     | up   | 1.15     | down | MAP1LC3B2     |
| 8047926a      | 2.27E-07 | 1.77     | up   | 1.81     | down | 1.07     | up   | 1.09     | up   | MAP2          |
| 7984408a      | 9.19E-05 | 1.11     | down | 1.57     | down | 1.15     | up   | 1.04     | down | MAP2K5        |
| 8105436a      | 3.12E-10 | 2.11     | down | 1.10     | up   | 1.65     | down | 1.34     | up   | MAP3K1        |
| 8084589a      | 4.31E-05 | 1.62     | up   | 1.19     | up   | 1.22     | down | 1.07     | down | MAP3K13       |
| 8171653a      | 1.01E-06 | 1.15     | down | 2.16     | up   | 1.20     | down | 2.55     | down | MAP3K15;PDHA1 |
| 8054997a      | 6.19E-07 | 1.38     | up   | 1.19     | down | 1.48     | up   | 1.17     | down | MAP3K2        |
| 8129804a      | 1.94E-05 | 2.59     | up   | 1.85     | up   | 3.90     | up   | 1.51     | down | MAP3K5        |
| 8043945a      | 2.84E-06 | 1.28     | up   | 1.01     | down | 1.28     | up   | 1.39     | up   | MAP4K4        |
| 8092404a      | 1.65E-05 | 1.12     | up   | 1.29     | up   | 1.05     | up   | 1.26     | down | MAP6D1        |
| 8129783a      | 3.29E-07 | 1.38     | up   | 1.20     | up   | 1.34     | up   | 1.17     | down | MAP7          |
| 8175369a      | 1.38E-08 | 1.02     | down | 2.03     | down | 1.15     | up   | 1.04     | up   | MAP7D3        |
| 8119016a      | 9.80E-05 | 1.09     | down | 1.50     | up   | 1.84     | down | 1.16     | down | MAPK13        |
| 8000811a      | 1.78E-06 | 1.47     | up   | 1.03     | up   | 1.24     | up   | 1.23     | up   | MAPK3         |
| 7983763a      | 1.70E-05 | 1.05     | down | 1.45     | down | 1.10     | down | 1.10     | up   | MAPK6         |
| 7909236a      | 9.87E-07 | 1.02     | down | 1.29     | down | 1.18     | down | 1.24     | up   | MAPKAPK2      |
| 8101925a      | 5.22E-05 | 1.08     | up   | 1.60     | down | 1.05     | down | 1.21     | up   | MAPKSP1       |
| 8025421a      | 6.98E-06 | 1.28     | up   | 1.15     | up   | 1.56     | up   | 1.13     | down | MAR2          |
| 7929247a      | 1.02E-06 | 1.38     | down | 1.09     | up   | 1.44     | down | 1.10     | down | MAR5          |
| 8121563a      | 1.58E-05 | 1.00     | up   | 1.22     | down | 1.21     | up   | 1.33     | up   | MARCKS        |
| 7909841a      | 1.65E-08 | 1.22     | up   | 2.43     | up   | 1.05     | down | 9.26     | down | MARK1         |



| Transcript ID | p-value  | Arsenic |      | Chromium |      | Nickel |      | Vanadium |      | Gene Symbol     |
|---------------|----------|---------|------|----------|------|--------|------|----------|------|-----------------|
|               |          | Δ       | Reg  | Δ        | Reg  | Δ      | Reg  | Δ        | Reg  |                 |
| 7956443a      | 3.58E-05 | 1.15    | down | 1.14     | up   | 1.13   | down | 1.07     | up   | MARS            |
| 8177498a      | 3.65E-07 | 1.00    | up   | 1.83     | down | 1.60   | up   | 2.81     | up   | MARVELD2        |
| 8105741a      | 3.35E-07 | 1.16    | down | 1.10     | up   | 1.26   | down | 1.40     | up   | MAST4           |
| 8050537a      | 1.67E-06 | 1.41    | up   | 1.35     | down | 1.51   | up   | 1.30     | up   | MATN3           |
| 8060705a      | 5.21E-05 | 1.48    | down | 1.04     | down | 1.49   | down | 1.11     | down | MAVS            |
| 8134737a      | 2.53E-05 | 1.20    | up   | 1.06     | up   | 1.14   | up   | 1.05     | down | MBLAC1          |
| 8175177a      | 8.97E-05 | 1.15    | up   | 1.07     | down | 1.13   | up   | 1.07     | up   | MBNL3           |
| 8050160a      | 1.05E-05 | 1.16    | up   | 1.42     | down | 1.11   | up   | 1.28     | up   | MBOAT2          |
| 8039166a      | 1.40E-05 | 1.14    | down | 1.14     | up   | 1.09   | down | 1.16     | up   | MBOAT7          |
| 8003089a      | 1.56E-06 | 1.27    | up   | 1.25     | up   | 1.45   | up   | 1.29     | down | MBTPS1          |
| 8166382a      | 3.32E-05 | 1.14    | up   | 1.31     | up   | 1.19   | down | 1.09     | down | MBTPS2          |
| 8076563a      | 3.36E-06 | 1.11    | up   | 1.50     | up   | 1.07   | up   | 1.15     | down | MCAT            |
| 8113551a      | 1.45E-05 | 1.09    | up   | 1.63     | down | 1.66   | down | 1.08     | up   | MCC             |
| 8092358a      | 4.12E-06 | 1.13    | up   | 1.48     | up   | 1.52   | up   | 1.91     | down | MCF2L2          |
| 7919751a      | 2.47E-08 | 1.12    | down | 1.50     | down | 1.21   | down | 1.33     | up   | MCL1            |
| 8070988a      | 9.27E-05 | 1.13    | up   | 1.31     | up   | 1.00   | down | 1.05     | down | MCM3AP;MCM3APAS |
| 8060813a      | 3.26E-05 | 1.71    | down | 1.04     | up   | 1.75   | down | 1.08     | down | MCM8            |
| 8129214a      | 9.75E-08 | 1.61    | up   | 1.55     | up   | 1.86   | up   | 1.24     | down | MCM9            |
| 8129218a      | 5.82E-08 | 1.42    | up   | 1.46     | up   | 1.60   | up   | 1.22     | down | MCM9            |
| 7917283a      | 7.43E-10 | 1.80    | up   | 1.66     | up   | 2.04   | up   | 2.82     | down | MCOLN2          |
| 7917304a      | 1.17E-08 | 1.86    | up   | 1.78     | up   | 2.69   | up   | 3.41     | down | MCOLN3          |
| 7950864a      | 9.77E-05 | 1.11    | down | 1.44     | up   | 1.34   | down | 1.33     | down | ME3             |
| 8175998a      | 3.33E-06 | 1.28    | down | 1.47     | down | 1.42   | down | 1.12     | up   | MECP2           |
| 8014841a      | 1.39E-06 | 1.06    | down | 1.42     | up   | 1.02   | down | 1.58     | down | MED1            |
| 8110886a      | 5.00E-05 | 1.38    | up   | 1.36     | up   | 1.70   | up   | 1.13     | down | MED10;DNAL4     |
| 8003922a      | 4.30E-07 | 1.49    | up   | 1.05     | down | 1.19   | up   | 1.53     | down | MED11           |
| 8083360a      | 2.49E-05 | 1.52    | up   | 1.10     | up   | 1.43   | up   | 2.79     | down | MED12L          |
| 7966706a      | 2.35E-05 | 1.11    | up   | 1.00     | up   | 1.40   | up   | 1.14     | down | MED13L          |
| 8172119a      | 3.74E-09 | 1.14    | down | 1.57     | down | 1.32   | down | 1.43     | up   | MED14           |
| 7943176a      | 3.84E-10 | 1.30    | down | 1.44     | up   | 1.39   | down | 1.14     | down | MED17           |
| 8148022a      | 4.88E-06 | 1.26    | up   | 1.02     | down | 1.28   | up   | 1.12     | down | MED30           |
| 7971550a      | 7.11E-05 | 1.16    | down | 1.22     | down | 1.52   | down | 1.26     | up   | MED4            |
| 7915516a      | 2.42E-07 | 1.16    | up   | 1.21     | up   | 1.06   | up   | 1.32     | down | MED8            |
| 8005260a      | 2.60E-08 | 1.10    | up   | 1.50     | up   | 1.06   | up   | 1.13     | down | MED9            |
| 7986411a      | 6.02E-06 | 1.04    | down | 1.46     | down | 1.11   | down | 1.03     | down | MEF2A           |
| 7976795a      | 3.42E-05 | 1.17    | down | 1.14     | down | 1.21   | down | 1.59     | up   | MEG3            |
| 7911799a      | 3.11E-07 | 1.11    | down | 1.58     | down | 1.06   | up   | 1.11     | up   | MEGF6           |
| 8042356a      | 2.97E-09 | 1.16    | up   | 3.48     | down | 1.16   | up   | 4.20     | up   | MEIS1           |
| 8005695a      | 5.64E-06 | 1.06    | down | 1.44     | down | 1.37   | down | 1.07     | up   | MEIS3P1;MEIS3P2 |
| 7949206a      | 1.19E-06 | 1.10    | up   | 1.40     | up   | 1.03   | down | 1.24     | down | MEN1            |
| 8044391a      | 4.17E-07 | 1.61    | up   | 2.13     | up   | 1.23   | up   | 1.64     | down | MERTK           |
| 8135601a      | 1.70E-06 | 1.38    | up   | 1.50     | down | 1.46   | up   | 1.43     | up   | MET             |
| 8011275a      | 9.26E-09 | 1.27    | up   | 1.51     | up   | 1.13   | up   | 1.48     | down | METT10D         |
| 8158544a      | 4.19E-05 | 1.09    | up   | 1.42     | up   | 1.11   | up   | 1.48     | down | METT11A;ASB6    |
| 7993833a      | 2.85E-05 | 1.32    | up   | 1.02     | down | 1.21   | up   | 1.21     | up   | METT19          |
| 7988245a      | 3.00E-06 | 1.23    | up   | 1.39     | down | 1.11   | up   | 1.17     | down | MFAP1           |
| 7955729a      | 9.05E-07 | 1.38    | up   | 1.06     | up   | 1.33   | up   | 1.07     | up   | MFSD5           |
| 8054356a      | 8.53E-06 | 1.39    | up   | 1.26     | up   | 1.15   | up   | 1.25     | down | MFSD9           |
| 8136662a      | 2.64E-12 | 1.07    | down | 1.28     | down | 1.04   | down | 6.28     | up   | MGAM            |
| 8054135a      | 1.45E-09 | 1.38    | up   | 1.71     | up   | 1.03   | up   | 6.27     | down | MGAT4A          |
| 8045349a      | 4.64E-06 | 1.46    | up   | 1.53     | up   | 1.29   | up   | 1.07     | down | MGAT5           |
| 8175256a      | 2.62E-06 | 1.37    | up   | 1.21     | down | 1.03   | up   | 1.79     | down | MGC16121        |
| 8074695a      | 1.64E-06 | 1.41    | up   | 1.12     | down | 1.73   | up   | 1.53     | up   | MGC16703        |

| Transcript ID | Arsenic  |          |      | Chromium |      | Nickel   |      | Vanadium |      | Gene Symbol |
|---------------|----------|----------|------|----------|------|----------|------|----------|------|-------------|
|               | p-value  | $\Delta$ | Reg  | $\Delta$ | Reg  | $\Delta$ | Reg  | $\Delta$ | Reg  |             |
| 8123606a      | 1.13E-07 | 2.32     | up   | 1.09     | up   | 1.75     | up   | 2.13     | down | MGC39372    |
| 8007799a      | 1.07E-08 | 1.25     | down | 2.11     | up   | 1.07     | down | 2.05     | down | MGC57346    |
| 8019563a      | 2.31E-05 | 1.08     | down | 1.48     | down | 1.22     | down | 1.05     | up   | MGC70870    |
| 7992998a      | 2.28E-05 | 1.04     | up   | 1.20     | down | 1.21     | down | 1.20     | up   | MGRN1       |
| 8097513a      | 7.47E-06 | 1.19     | up   | 2.03     | down | 1.12     | up   | 1.24     | down | MGST2       |
| 7906978a      | 5.49E-06 | 1.04     | up   | 1.43     | down | 1.02     | down | 1.36     | up   | MGST3       |
| 8074274a      | 1.23E-05 | 1.14     | down | 1.10     | down | 1.11     | down | 1.22     | up   | MICAL3      |
| 8171297a      | 2.01E-09 | 1.60     | down | 2.54     | down | 1.61     | down | 2.64     | up   | MID1        |
| 8166797a      | 7.28E-05 | 1.44     | down | 1.35     | down | 1.40     | down | 1.65     | up   | MID1P1      |
| 8112182a      | 4.90E-09 | 1.81     | down | 1.41     | down | 1.19     | down | 1.18     | up   | MIER3       |
| 8018343a      | 8.92E-07 | 1.45     | up   | 1.30     | up   | 1.57     | up   | 1.35     | down | MIF4GD      |
| 7928937a      | 9.93E-06 | 1.31     | down | 1.03     | up   | 1.42     | down | 1.12     | down | MINPP1      |
| 7973985a      | 5.05E-05 | 1.02     | down | 1.10     | up   | 1.23     | up   | 1.85     | down | MIPOL1      |
| 7969576a      | 3.24E-05 | 1.46     | up   | 1.18     | up   | 1.06     | up   | 1.79     | down | MIR17HG     |
| 8008885a      | 2.57E-05 | 1.10     | up   | 1.35     | down | 1.96     | up   | 1.14     | down | MIR21       |
| 8064967a      | 5.62E-06 | 1.63     | down | 1.07     | down | 1.94     | down | 1.24     | down | MKKS        |
| 8143387a      | 2.98E-05 | 1.15     | up   | 1.25     | up   | 1.10     | up   | 1.15     | down | MKRN1       |
| 7932733a      | 6.28E-06 | 1.38     | up   | 2.81     | up   | 2.60     | up   | 2.87     | down | MKX         |
| 8078544a      | 6.43E-07 | 1.37     | down | 1.56     | down | 1.32     | down | 1.22     | up   | MLH1        |
| 7944223a      | 2.15E-05 | 1.14     | down | 1.27     | up   | 1.01     | up   | 1.26     | down | MLL         |
| 7944262a      | 1.12E-07 | 1.15     | down | 1.44     | up   | 1.01     | down | 1.22     | down | MLL         |
| 7905329a      | 1.39E-06 | 1.14     | up   | 2.91     | down | 2.01     | down | 2.01     | up   | MLLT11      |
| 8160332a      | 1.21E-06 | 1.37     | down | 1.29     | down | 5.02     | down | 1.74     | down | MLLT3       |
| 8006788a      | 4.59E-05 | 1.01     | up   | 1.06     | up   | 1.10     | up   | 1.36     | down | MLLT6       |
| 8049487a      | 1.36E-05 | 1.12     | up   | 1.49     | down | 1.00     | down | 1.67     | up   | MLPH        |
| 8007290a      | 2.58E-06 | 1.10     | up   | 1.22     | up   | 1.08     | up   | 1.59     | down | MLX;PSMC3IP |
| 7997525a      | 6.07E-05 | 1.38     | up   | 1.03     | up   | 1.46     | up   | 1.12     | down | MLYCD       |
| 7966213a      | 1.64E-05 | 1.06     | up   | 1.09     | up   | 1.38     | up   | 1.43     | down | MMAB        |
| 7973336a      | 8.40E-06 | 1.11     | down | 1.32     | down | 1.14     | down | 1.99     | up   | MMP14       |
| 8151684a      | 1.22E-09 | 1.00     | down | 1.92     | down | 3.10     | down | 5.13     | up   | MMP16       |
| 8151686a      | 1.31E-09 | 1.33     | up   | 1.85     | down | 2.12     | down | 4.78     | up   | MMP16       |
| 7995681a      | 1.16E-07 | 1.46     | up   | 4.12     | down | 1.26     | up   | 4.49     | up   | MMP2        |
| 8062123a      | 2.90E-07 | 2.65     | down | 1.31     | down | 2.67     | down | 1.62     | up   | MMP24       |
| 7989146a      | 8.36E-07 | 1.62     | up   | 1.39     | down | 1.61     | up   | 3.01     | down | MNS1        |
| 8053064a      | 4.10E-06 | 1.14     | up   | 1.15     | up   | 1.18     | up   | 1.21     | down | MOBK1B      |
| 8020955a      | 2.00E-05 | 1.10     | up   | 1.73     | up   | 1.06     | up   | 1.64     | down | MOCOS       |
| 8126214a      | 4.76E-05 | 1.15     | up   | 1.38     | up   | 1.12     | up   | 1.25     | down | MOCOS1      |
| 8112020a      | 4.13E-08 | 1.46     | down | 1.21     | down | 1.22     | down | 1.48     | up   | MOCOS2      |
| 7997321a      | 1.48E-06 | 1.32     | up   | 1.41     | down | 1.26     | up   | 1.14     | up   | MON1B       |
| 8103753a      | 3.95E-05 | 1.03     | down | 1.45     | down | 1.03     | up   | 1.08     | down | MORF4       |
| 7985226a      | 5.92E-05 | 1.02     | down | 1.30     | down | 1.07     | up   | 1.09     | down | MORF4L1     |
| 8174253a      | 8.59E-07 | 1.17     | up   | 1.33     | down | 1.05     | up   | 1.25     | down | MORF4L2     |
| 7911701a      | 8.02E-06 | 1.19     | up   | 1.23     | up   | 1.26     | up   | 1.10     | down | MORN1       |
| 7909877a      | 9.52E-08 | 1.54     | up   | 1.85     | up   | 1.12     | up   | 2.96     | down | MOSC1       |
| 7909866a      | 2.25E-05 | 1.49     | up   | 1.34     | up   | 1.55     | up   | 1.51     | down | MOSC2       |
| 8175288a      | 2.48E-05 | 1.41     | up   | 1.31     | down | 1.14     | up   | 1.06     | down | MOSPD1      |
| 8004521a      | 1.21E-07 | 1.08     | up   | 1.31     | up   | 1.05     | up   | 1.27     | down | MPDU1       |
| 8160088a      | 4.89E-06 | 1.08     | down | 1.50     | down | 1.26     | down | 1.34     | up   | MPDZ        |
| 8003068a      | 1.74E-11 | 1.48     | up   | 1.45     | up   | 1.65     | up   | 1.96     | down | MPHOSPH6    |
| 8016932a      | 7.07E-05 | 1.07     | down | 1.33     | up   | 1.04     | up   | 1.09     | down | MPO         |
| 8176174a      | 2.95E-09 | 1.07     | down | 1.75     | down | 1.22     | down | 1.75     | up   | MPP1        |
| 8015846a      | 1.18E-07 | 1.02     | up   | 1.36     | up   | 1.03     | up   | 1.31     | down | MPP3        |
| 8058273a      | 4.27E-08 | 1.19     | up   | 1.57     | down | 1.04     | down | 4.19     | up   | MPP4        |

| Transcript ID | p-value  | Arsenic  |      | Chromium |      | Nickel   |      | Vanadium |      | Gene Symbol    |
|---------------|----------|----------|------|----------|------|----------|------|----------|------|----------------|
|               |          | $\Delta$ | Reg  | $\Delta$ | Reg  | $\Delta$ | Reg  | $\Delta$ | Reg  |                |
| 7975203a      | 8.42E-05 | 1.05     | up   | 1.22     | down | 1.28     | down | 1.30     | up   | MPP5           |
| 7932765a      | 3.10E-07 | 1.25     | up   | 4.54     | up   | 1.21     | up   | 3.11     | down | MPP7           |
| 8051066a      | 3.13E-05 | 1.34     | up   | 1.10     | down | 1.29     | up   | 1.14     | up   | MPV17          |
| 7993453a      | 5.66E-05 | 1.51     | down | 1.28     | up   | 1.56     | down | 1.26     | up   | MPV17L         |
| 7951046a      | 2.30E-05 | 1.17     | down | 1.48     | up   | 1.02     | down | 1.46     | down | MRE11A         |
| 8026182a      | 7.40E-05 | 1.11     | up   | 1.02     | up   | 1.54     | up   | 1.00     | up   | MRI1           |
| 8006668a      | 2.51E-05 | 1.44     | up   | 1.27     | up   | 1.25     | up   | 1.29     | down | MRM1           |
| 8016366a      | 4.36E-06 | 1.19     | up   | 1.46     | up   | 1.05     | up   | 1.11     | down | MRPL10         |
| 8010664a      | 7.32E-06 | 1.24     | up   | 1.19     | up   | 1.17     | up   | 1.19     | down | MRPL12         |
| 8042962a      | 1.33E-06 | 1.23     | up   | 1.15     | up   | 1.15     | up   | 1.16     | down | MRPL19         |
| 8126512a      | 1.74E-05 | 1.18     | up   | 1.39     | up   | 1.15     | up   | 1.06     | down | MRPL2          |
| 7901601a      | 9.35E-06 | 1.10     | up   | 1.17     | up   | 1.06     | up   | 1.05     | down | MRPL37         |
| 8018511a      | 2.84E-06 | 1.25     | up   | 1.16     | up   | 1.25     | up   | 1.25     | down | MRPL38         |
| 8069620a      | 6.78E-05 | 1.06     | down | 1.25     | up   | 1.19     | down | 1.22     | down | MRPL39         |
| 8025586a      | 3.48E-06 | 1.06     | up   | 1.23     | up   | 1.13     | up   | 1.37     | down | MRPL4          |
| 8006762a      | 2.12E-07 | 1.04     | up   | 1.46     | up   | 1.01     | down | 1.56     | down | MRPL45         |
| 8162880a      | 4.06E-05 | 1.12     | down | 1.20     | up   | 1.20     | down | 1.70     | down | MRPL50         |
| 8053165a      | 5.19E-05 | 1.24     | up   | 1.05     | down | 1.06     | up   | 1.01     | up   | MRPL53;CCDC142 |
| 8126394a      | 9.39E-05 | 1.01     | down | 1.16     | up   | 1.12     | up   | 1.13     | down | MRPS10         |
| 7985757a      | 4.04E-05 | 1.08     | up   | 1.36     | down | 1.03     | up   | 1.09     | down | MRPS11         |
| 8179139a      | 8.53E-08 | 1.63     | up   | 1.52     | up   | 1.57     | up   | 1.03     | up   | MRPS18B        |
| 8159249a      | 3.65E-07 | 1.06     | up   | 1.53     | up   | 1.13     | up   | 1.46     | down | MRPS2          |
| 8060599a      | 9.60E-06 | 1.31     | down | 1.31     | up   | 1.40     | down | 1.11     | down | MRPS26         |
| 8105181a      | 3.06E-08 | 1.56     | up   | 2.18     | up   | 1.50     | up   | 1.73     | down | MRPS30         |
| 8044111a      | 1.21E-06 | 1.24     | up   | 1.26     | up   | 1.05     | up   | 1.24     | down | MRPS9          |
| 8157638a      | 1.09E-05 | 1.12     | down | 1.35     | up   | 1.14     | down | 1.69     | down | MRRF           |
| 8117194a      | 1.32E-08 | 1.24     | up   | 1.47     | up   | 1.32     | up   | 1.17     | down | MRS2           |
| 7898549a      | 6.10E-06 | 1.21     | up   | 1.33     | up   | 1.06     | down | 1.25     | down | MRT04          |
| 8151334a      | 2.24E-09 | 2.00     | up   | 3.50     | down | 2.01     | up   | 1.17     | up   | MSC            |
| 8106633a      | 4.63E-07 | 1.19     | down | 1.51     | down | 1.01     | down | 1.67     | up   | MSH3           |
| 8118259a      | 4.34E-05 | 1.30     | up   | 1.13     | down | 1.42     | up   | 1.05     | up   | MSH5;C6orf26   |
| 7992071a      | 1.79E-08 | 1.75     | down | 1.73     | down | 2.73     | down | 2.18     | up   | MSLN           |
| 8167965a      | 5.75E-05 | 1.11     | up   | 1.30     | down | 1.02     | down | 1.02     | down | MSN            |
| 7956856a      | 7.28E-06 | 1.45     | down | 1.28     | down | 1.28     | down | 1.05     | up   | MSRB3          |
| 8145766a      | 3.14E-09 | 1.38     | down | 1.38     | up   | 2.18     | down | 3.46     | up   | MST131         |
| 8093852a      | 3.90E-05 | 1.02     | up   | 1.08     | up   | 1.30     | up   | 1.02     | down | MSX1           |
| 7995806a      | 5.48E-06 | 1.42     | down | 1.07     | up   | 1.41     | down | 2.01     | down | MT1A           |
| 7995813a      | 7.00E-05 | 1.43     | down | 1.03     | down | 1.21     | down | 1.09     | up   | MT1DP          |
| 7995825a      | 5.97E-05 | 1.29     | up   | 1.06     | up   | 1.72     | up   | 1.76     | down | MT1F           |
| 8095376a      | 1.43E-05 | 1.40     | down | 1.03     | up   | 1.24     | down | 1.14     | up   | MT2A           |
| 8148124a      | 9.88E-05 | 1.07     | down | 1.09     | up   | 1.19     | up   | 1.45     | down | MTBP           |
| 8126066a      | 7.81E-05 | 1.15     | up   | 1.12     | up   | 1.15     | up   | 1.23     | up   | MTCH1          |
| 8176219a      | 1.31E-07 | 1.02     | up   | 1.84     | down | 1.10     | down | 1.36     | up   | MTCP1;MTCP1NB  |
| 8147483a      | 7.05E-05 | 1.02     | up   | 1.14     | up   | 1.05     | up   | 1.19     | down | MTDH           |
| 8060196a      | 3.69E-08 | 1.38     | up   | 1.07     | up   | 1.40     | up   | 1.14     | down | MTERFD2        |
| 7903032a      | 7.23E-05 | 1.13     | down | 1.14     | up   | 1.27     | down | 1.05     | down | MTF2           |
| 8084064a      | 9.98E-05 | 1.13     | down | 1.16     | up   | 1.21     | down | 1.08     | up   | MTHFD2         |
| 8003233a      | 1.09E-05 | 1.20     | up   | 1.31     | up   | 1.27     | up   | 1.20     | down | MTHFSD         |
| 8052250a      | 4.63E-07 | 1.30     | up   | 1.16     | up   | 1.28     | up   | 1.18     | down | MTIF2          |
| 8170428a      | 9.19E-09 | 1.12     | down | 2.28     | down | 1.38     | down | 1.57     | up   | MTM1           |
| 8170443a      | 2.25E-09 | 1.27     | down | 1.79     | down | 1.70     | down | 1.68     | up   | MTMR1          |
| 7987048a      | 3.12E-05 | 1.25     | down | 1.40     | down | 1.02     | up   | 1.23     | down | MTMR10;MTMR15  |
| 7919669a      | 6.84E-09 | 1.15     | down | 1.42     | down | 1.16     | down | 1.94     | up   | MTMR11         |

| Transcript ID | p-value  | Arsenic |      | Chromium |      | Nickel |      | Vanadium |      | Gene Symbol              |
|---------------|----------|---------|------|----------|------|--------|------|----------|------|--------------------------|
|               |          | Δ       | Reg  | Δ        | Reg  | Δ      | Reg  | Δ        | Reg  |                          |
| 8111339a      | 2.41E-06 | 1.29    | up   | 1.39     | up   | 1.25   | up   | 1.29     | down | MTMR12                   |
| 7951112a      | 2.77E-06 | 1.23    | down | 1.08     | up   | 1.22   | down | 1.24     | up   | MTMR2                    |
| 8017019a      | 2.31E-06 | 1.40    | up   | 1.09     | down | 1.37   | up   | 1.06     | up   | MTMR4                    |
| 7970655a      | 7.64E-06 | 1.17    | down | 1.54     | down | 1.46   | down | 1.18     | up   | MTMR6                    |
| 8173245a      | 8.89E-09 | 1.19    | up   | 1.07     | up   | 1.47   | up   | 6.37     | down | MTMR8;ASB12              |
| 8144586a      | 6.26E-07 | 1.19    | down | 1.48     | down | 1.22   | down | 1.31     | up   | MTMR9                    |
| 8130383a      | 8.22E-05 | 1.08    | up   | 1.06     | down | 1.22   | up   | 1.08     | down | MTRF1L                   |
| 8104422a      | 5.82E-07 | 1.39    | up   | 1.69     | up   | 1.32   | up   | 1.55     | down | MTRR                     |
| 8002403a      | 7.91E-06 | 1.08    | up   | 1.49     | down | 1.32   | up   | 1.16     | up   | MTSS1L                   |
| 7974566a      | 4.82E-05 | 1.27    | up   | 1.31     | down | 1.08   | up   | 1.06     | up   | MUDENG                   |
| 8123802a      | 5.10E-08 | 1.33    | up   | 1.27     | up   | 1.31   | up   | 1.06     | down | MUTED;TXNDC5             |
| 8003332a      | 4.27E-05 | 1.27    | up   | 1.30     | up   | 1.61   | up   | 1.06     | down | MVD                      |
| 7994659a      | 1.08E-06 | 1.50    | up   | 1.25     | down | 1.16   | up   | 1.80     | up   | MVP                      |
| 8098995a      | 1.70E-06 | 1.00    | down | 1.70     | down | 1.01   | up   | 1.22     | up   | MXD4                     |
| 8031047a      | 8.40E-08 | 1.47    | down | 1.42     | down | 1.55   | down | 1.41     | up   | MYADM                    |
| 8011640a      | 2.18E-07 | 1.19    | up   | 1.60     | up   | 1.01   | up   | 1.30     | down | MYBBP1A;SPNS2            |
| 8151101a      | 8.95E-06 | 1.49    | down | 1.33     | down | 1.17   | down | 1.00     | up   | MYBL1                    |
| 8060086a      | 7.90E-08 | 1.34    | up   | 1.01     | down | 1.35   | up   | 1.17     | down | MYEOV2                   |
| 8075728a      | 2.04E-05 | 1.25    | down | 1.13     | up   | 1.10   | down | 1.19     | up   | MYH9                     |
| 7956211a      | 7.39E-06 | 1.05    | down | 1.22     | down | 1.02   | up   | 1.25     | up   | MYL6                     |
| 8062312a      | 5.55E-05 | 1.00    | up   | 1.12     | down | 1.05   | up   | 1.31     | up   | MYL9                     |
| 8117020a      | 1.45E-05 | 1.48    | up   | 2.01     | up   | 2.09   | up   | 1.16     | down | MYLIP                    |
| 8013860a      | 6.55E-06 | 1.26    | up   | 1.16     | down | 1.34   | up   | 1.20     | up   | MYO18A;TIAF1             |
| 8047127a      | 2.47E-05 | 1.19    | up   | 1.01     | up   | 1.02   | down | 1.49     | up   | MYO1B                    |
| 8014115a      | 1.88E-07 | 1.10    | down | 1.34     | up   | 1.00   | down | 2.84     | down | MYO1D                    |
| 7988876a      | 1.95E-05 | 2.02    | down | 1.19     | up   | 2.74   | down | 2.78     | down | MYO5C                    |
| 7927827a      | 4.19E-05 | 2.73    | up   | 1.30     | down | 3.80   | up   | 1.97     | up   | MYPN                     |
| 7916592a      | 2.07E-05 | 1.11    | up   | 1.41     | up   | 1.04   | up   | 1.31     | down | MYSM1                    |
| 7995055a      | 6.73E-05 | 1.33    | up   | 1.05     | up   | 1.17   | up   | 1.14     | up   | MYST1                    |
| 8001317a      | 2.65E-05 | 1.15    | up   | 1.20     | down | 1.16   | up   | 1.34     | up   | N4BP1                    |
| 8101086a      | 4.27E-05 | 1.04    | down | 1.96     | down | 1.01   | down | 1.10     | down | NAAA                     |
| 8047086a      | 1.45E-09 | 1.17    | up   | 1.50     | down | 1.38   | up   | 1.07     | up   | NAB1                     |
| 8139460a      | 3.77E-05 | 1.05    | up   | 1.05     | down | 1.08   | down | 1.33     | up   | NACAD                    |
| 8065510a      | 3.66E-05 | 1.68    | down | 1.33     | up   | 1.62   | down | 1.22     | down | NANP                     |
| 8156761a      | 3.00E-05 | 1.13    | down | 1.34     | up   | 1.14   | down | 1.45     | down | NANS                     |
| 8065372a      | 1.09E-06 | 2.13    | down | 1.23     | down | 2.13   | down | 1.07     | up   | NAPB                     |
| 8141872a      | 3.22E-06 | 1.01    | up   | 2.06     | down | 1.13   | down | 1.71     | up   | NAPEPLD                  |
| 8010804a      | 3.65E-05 | 1.10    | up   | 1.13     | up   | 1.38   | up   | 1.03     | down | NARF                     |
| 7989347a      | 2.71E-06 | 1.00    | up   | 1.14     | down | 1.17   | up   | 1.47     | down | NARG2                    |
| 8023481a      | 3.63E-05 | 1.02    | down | 1.22     | up   | 1.01   | down | 1.19     | down | NARS                     |
| 7939265a      | 2.95E-09 | 1.29    | up   | 1.83     | up   | 1.05   | up   | 1.50     | down | NAT10                    |
| 8061262a      | 6.05E-07 | 1.85    | down | 1.03     | down | 2.12   | down | 1.01     | down | NAT5                     |
| 8093578a      | 9.29E-09 | 1.16    | down | 1.59     | up   | 1.03   | down | 1.20     | down | NAT8L                    |
| 7908694a      | 4.18E-06 | 1.11    | down | 1.44     | down | 1.48   | down | 1.83     | up   | NAV1                     |
| 8050367a      | 4.35E-07 | 1.10    | up   | 1.24     | down | 1.07   | up   | 1.32     | up   | NBAS                     |
| 7904976a      | 6.77E-07 | 1.14    | down | 1.15     | up   | 1.30   | down | 1.09     | up   | NBPF8;NBPF10-12/14-16/20 |
| 8007471a      | 1.25E-07 | 1.18    | up   | 1.38     | up   | 1.24   | up   | 1.94     | down | NBR1                     |
| 8007462a      | 6.14E-06 | 1.06    | down | 1.43     | up   | 1.08   | down | 1.56     | down | NBR2                     |
| 7952830a      | 2.69E-05 | 1.27    | down | 1.17     | down | 1.13   | down | 1.08     | down | NCAPD3                   |
| 8156718a      | 6.58E-06 | 1.16    | down | 1.31     | up   | 1.08   | down | 1.36     | down | NCBP1                    |
| 8093156a      | 9.22E-05 | 1.11    | up   | 1.06     | up   | 1.22   | up   | 1.41     | down | NCBP2                    |
| 7922773a      | 2.79E-06 | 1.27    | down | 1.54     | down | 1.91   | down | 1.92     | up   | NCF2                     |
| 8082911a      | 2.89E-05 | 1.03    | up   | 1.31     | up   | 1.07   | up   | 1.39     | down | NCK1                     |

| Transcript ID | p-value  | Arsenic |      | Chromium |      | Nickel |      | Vanadium |      | Gene Symbol          |
|---------------|----------|---------|------|----------|------|--------|------|----------|------|----------------------|
|               |          | Δ       | Reg  | Δ        | Reg  | Δ      | Reg  | Δ        | Reg  |                      |
| 8059689a      | 1.10E-05 | 1.15    | up   | 1.16     | up   | 1.05   | up   | 1.18     | down | NCL;LOC100289394     |
| 8063211a      | 3.78E-05 | 1.06    | up   | 1.28     | down | 1.10   | up   | 1.27     | up   | NCOA3                |
| 8121861a      | 3.21E-06 | 1.28    | up   | 1.45     | down | 1.67   | up   | 1.24     | up   | NCOA7                |
| 8000957a      | 5.19E-07 | 1.43    | up   | 1.73     | up   | 1.34   | up   | 1.38     | down | NCRNA00095           |
| 8176336a      | 3.11E-05 | 1.18    | up   | 1.11     | up   | 1.41   | up   | 1.07     | down | NCRNA00105;ASMTL     |
| 8042059a      | 6.31E-05 | 1.29    | up   | 1.03     | down | 1.19   | up   | 1.01     | up   | NCRNA00117           |
| 8054611a      | 3.37E-05 | 1.07    | up   | 1.38     | down | 1.03   | up   | 1.18     | up   | NCRNA00152;LOC541471 |
| 8177214a      | 9.66E-06 | 1.18    | down | 1.43     | down | 1.21   | down | 1.41     | up   | NCRNA00185           |
| 7906576a      | 8.42E-05 | 1.22    | down | 1.25     | down | 1.42   | down | 1.12     | up   | NCSTN;COPA           |
| 7993467a      | 2.38E-07 | 1.31    | up   | 1.12     | up   | 1.33   | up   | 1.02     | down | NDE1;MYH11           |
| 8066051a      | 2.36E-05 | 1.07    | up   | 1.13     | down | 1.31   | up   | 1.13     | up   | NDRG3                |
| 8109283a      | 2.79E-05 | 1.17    | down | 1.30     | down | 1.23   | down | 1.22     | up   | NDST1                |
| 7934459a      | 1.40E-05 | 1.08    | up   | 1.41     | down | 1.10   | up   | 1.00     | down | NDST2                |
| 8169659a      | 1.54E-05 | 1.07    | up   | 1.56     | down | 1.04   | down | 1.07     | down | NDUFA1               |
| 8163930a      | 1.25E-05 | 1.05    | down | 1.34     | up   | 1.08   | up   | 1.42     | down | NDUFA8               |
| 8050591a      | 6.99E-06 | 1.46    | down | 1.05     | down | 1.29   | down | 1.14     | up   | NDUFAF2              |
| 7992402a      | 4.66E-06 | 1.12    | up   | 1.23     | down | 1.22   | down | 1.52     | up   | NDUFB10              |
| 8172296a      | 7.52E-08 | 1.16    | up   | 1.15     | down | 1.09   | up   | 1.14     | down | NDUFB11              |
| 8105311a      | 1.69E-08 | 1.85    | down | 1.48     | down | 1.29   | down | 1.59     | up   | NDUFS4               |
| 8104298a      | 4.49E-06 | 1.15    | up   | 1.34     | up   | 1.25   | up   | 1.36     | down | NDUFS6               |
| 8068857a      | 6.00E-08 | 1.05    | up   | 1.29     | up   | 1.16   | down | 1.22     | down | NDUFV3               |
| 7989094a      | 4.18E-09 | 1.06    | up   | 3.14     | down | 1.07   | up   | 1.33     | up   | NEDD4                |
| 8123936a      | 1.41E-05 | 2.10    | up   | 1.22     | down | 2.09   | up   | 1.32     | down | NEDD9                |
| 7916986a      | 2.12E-08 | 1.37    | down | 1.90     | down | 3.82   | down | 3.18     | up   | NEGR1                |
| 8103646a      | 1.06E-05 | 1.17    | down | 1.77     | down | 1.18   | down | 1.15     | up   | NEK1                 |
| 8005959a      | 3.78E-05 | 1.12    | up   | 1.16     | up   | 1.12   | up   | 1.20     | down | NEK8                 |
| 8165552a      | 1.21E-06 | 1.04    | down | 1.40     | up   | 1.40   | up   | 1.38     | down | NELF                 |
| 7925954a      | 1.10E-05 | 1.06    | down | 1.13     | up   | 1.20   | down | 1.72     | up   | NET1                 |
| 8001197a      | 3.69E-08 | 1.20    | down | 1.53     | down | 1.21   | down | 2.32     | up   | NETO2                |
| 8179851a      | 3.04E-08 | 1.59    | up   | 1.01     | down | 1.53   | up   | 1.26     | up   | NEU1                 |
| 7902495a      | 9.20E-06 | 1.30    | down | 1.43     | down | 1.71   | down | 1.08     | up   | NEXN                 |
| 7917151a      | 8.90E-05 | 1.11    | down | 1.34     | up   | 1.24   | down | 1.02     | up   | NEXN;C1orf118        |
| 7909027a      | 1.01E-06 | 1.29    | down | 1.13     | down | 2.20   | down | 1.77     | up   | NFASC                |
| 7996954a      | 9.74E-05 | 1.16    | up   | 1.34     | down | 1.19   | up   | 1.30     | up   | NFAT5                |
| 7994506a      | 1.05E-06 | 1.36    | up   | 1.09     | up   | 1.14   | up   | 1.06     | down | NFATC2IP             |
| 7996744a      | 8.73E-05 | 1.07    | up   | 1.26     | down | 1.12   | up   | 1.26     | up   | NFATC3               |
| 7973709a      | 1.64E-05 | 1.42    | up   | 1.19     | up   | 1.08   | down | 1.24     | down | NFATC4               |
| 8056977a      | 2.70E-09 | 1.29    | up   | 1.20     | down | 1.42   | up   | 1.19     | down | NFE2L2               |
| 7901788a      | 5.45E-10 | 1.15    | down | 2.52     | down | 1.47   | down | 6.59     | down | NFIA                 |
| 8026139a      | 6.89E-05 | 1.26    | down | 1.26     | down | 1.05   | down | 1.39     | up   | NFIX                 |
| 7978644a      | 6.10E-07 | 1.55    | up   | 1.50     | down | 1.54   | up   | 1.05     | down | NFKBIA               |
| 8028552a      | 5.24E-09 | 1.05    | up   | 1.63     | up   | 1.17   | down | 1.71     | down | NFKBIB               |
| 8179249a      | 2.20E-06 | 1.18    | up   | 1.02     | up   | 1.40   | up   | 1.01     | down | NFKBIL1              |
| 8153790a      | 9.86E-05 | 1.11    | down | 1.22     | down | 1.06   | down | 1.14     | up   | NFKBIL2              |
| 7952677a      | 6.78E-08 | 1.15    | up   | 1.21     | down | 1.02   | up   | 1.52     | down | NFRKB                |
| 8052784a      | 9.90E-06 | 1.19    | up   | 1.05     | up   | 1.12   | up   | 1.16     | down | NFU1                 |
| 7985983a      | 2.52E-05 | 1.13    | up   | 1.31     | down | 1.27   | up   | 1.14     | down | NGRN                 |
| 8059071a      | 2.87E-05 | 1.33    | up   | 1.16     | up   | 1.41   | up   | 1.03     | down | NHEJ1;SLC23A3        |
| 8166266a      | 7.01E-07 | 1.07    | down | 1.17     | down | 1.23   | down | 1.37     | up   | NHS                  |
| 7925320a      | 7.23E-05 | 1.28    | up   | 1.38     | up   | 1.22   | up   | 2.17     | down | NID1                 |
| 8047356a      | 4.04E-05 | 1.20    | up   | 1.01     | up   | 1.29   | up   | 1.03     | up   | NIF3L1;LOC100129888  |
| 8162455a      | 2.89E-05 | 1.12    | up   | 1.17     | down | 1.52   | up   | 1.01     | up   | NINJ1                |
| 8065485a      | 1.01E-07 | 1.50    | down | 1.24     | up   | 1.55   | down | 1.20     | down | NINL                 |

| Transcript ID | p-value  | Arsenic |      | Chromium |      | Nickel |      | Vanadium |      | Gene Symbol            |
|---------------|----------|---------|------|----------|------|--------|------|----------|------|------------------------|
|               |          | Δ       | Reg  | Δ        | Reg  | Δ      | Reg  | Δ        | Reg  |                        |
| 7986675a      | 1.39E-06 | 1.00    | down | 1.20     | down | 1.16   | up   | 1.91     | down | NIPA1                  |
| 7986665a      | 2.17E-06 | 1.07    | up   | 1.16     | down | 1.14   | up   | 1.19     | down | NIPA2;CYFIP1           |
| 7898939a      | 1.40E-06 | 1.14    | down | 1.21     | up   | 1.44   | down | 1.57     | up   | NIPAL3                 |
| 8109563a      | 1.62E-05 | 1.33    | up   | 1.78     | up   | 1.16   | up   | 1.98     | down | NIPAL4                 |
| 8007197a      | 3.53E-06 | 1.10    | up   | 1.29     | up   | 1.14   | up   | 1.72     | down | NKIRAS2                |
| 8115840a      | 4.35E-07 | 1.12    | up   | 1.36     | up   | 1.32   | up   | 1.48     | down | NKX2-5                 |
| 8149811a      | 3.33E-05 | 1.14    | down | 1.27     | down | 1.13   | down | 1.48     | up   | NKX3-1                 |
| 8014214a      | 2.74E-07 | 1.17    | up   | 1.67     | up   | 1.07   | up   | 1.69     | down | NLE1                   |
| 8004385a      | 1.60E-07 | 1.37    | up   | 1.24     | up   | 1.21   | up   | 1.24     | down | NLGN2                  |
| 8005814a      | 4.53E-06 | 1.13    | up   | 1.30     | down | 1.20   | up   | 1.45     | down | NLK                    |
| 7995926a      | 6.90E-08 | 1.05    | down | 1.56     | down | 1.03   | up   | 1.43     | up   | NLRC5                  |
| 7946334a      | 5.30E-07 | 1.19    | down | 2.36     | up   | 1.86   | down | 1.41     | up   | NLRP10                 |
| 8039545a      | 3.30E-05 | 1.09    | up   | 1.14     | up   | 1.61   | up   | 1.06     | up   | NLRP11                 |
| 8083757a      | 3.27E-07 | 1.18    | up   | 1.51     | up   | 1.13   | up   | 1.62     | down | NMD3                   |
| 8114354a      | 5.78E-09 | 1.03    | up   | 1.15     | up   | 1.03   | down | 1.45     | down | NME5                   |
| 8007715a      | 7.77E-08 | 1.02    | up   | 1.36     | up   | 1.05   | up   | 1.57     | down | NMT1                   |
| 7932227a      | 1.19E-08 | 1.49    | down | 1.76     | down | 1.86   | down | 1.49     | up   | NMT2                   |
| 8100464a      | 2.71E-08 | 1.60    | down | 2.70     | up   | 2.34   | down | 1.72     | down | NMU                    |
| 7943998a      | 6.47E-05 | 1.28    | down | 1.53     | up   | 1.12   | down | 1.09     | down | NNMT                   |
| 7911359a      | 3.04E-06 | 1.00    | up   | 1.44     | up   | 1.10   | down | 1.05     | down | NOC2L                  |
| 7935146a      | 2.13E-07 | 1.29    | down | 1.20     | up   | 1.59   | down | 1.38     | down | NOC3L                  |
| 7996448a      | 9.22E-05 | 1.20    | up   | 1.04     | down | 1.28   | up   | 1.10     | up   | NOL3                   |
| 8162352a      | 5.56E-07 | 1.16    | down | 1.49     | up   | 1.02   | down | 1.83     | down | NOL8                   |
| 7912086a      | 2.94E-07 | 1.03    | up   | 1.31     | up   | 1.14   | down | 1.10     | down | NOL9                   |
| 8168280a      | 4.47E-07 | 1.18    | up   | 1.11     | down | 1.05   | up   | 1.11     | down | NONO                   |
| 8099051a      | 1.01E-05 | 1.10    | down | 1.17     | up   | 1.37   | down | 1.19     | down | NOP14                  |
| 7960575a      | 5.36E-06 | 1.18    | up   | 1.49     | up   | 1.15   | up   | 1.16     | down | NOP2                   |
| 8060484a      | 5.66E-07 | 1.44    | down | 1.22     | up   | 1.77   | down | 1.06     | down | NOP56;SNORD56          |
| 8047518a      | 2.74E-07 | 1.07    | up   | 1.20     | up   | 1.02   | up   | 1.29     | down | NOP58                  |
| 8165217a      | 4.00E-05 | 1.12    | down | 1.61     | up   | 1.03   | up   | 1.24     | down | NOTCH1                 |
| 7919095a      | 7.56E-05 | 1.01    | down | 1.17     | down | 1.23   | down | 1.20     | up   | NOTCH2                 |
| 7904702a      | 7.96E-05 | 1.08    | down | 1.24     | down | 1.30   | down | 1.03     | up   | NOTCH2NL;NBPF14;NBPF10 |
| 8148049a      | 2.01E-09 | 1.42    | up   | 3.57     | up   | 1.47   | up   | 3.38     | down | NOV                    |
| 7950933a      | 9.02E-10 | 1.14    | down | 8.16     | up   | 1.19   | down | 1.21     | down | NOX4                   |
| 8029870a      | 4.11E-07 | 1.11    | up   | 1.43     | up   | 1.03   | down | 1.26     | down | NPAS1                  |
| 8043909a      | 1.67E-06 | 2.49    | up   | 1.52     | up   | 1.59   | up   | 1.53     | up   | NPAS2                  |
| 7951497a      | 4.19E-05 | 1.15    | down | 1.27     | up   | 1.06   | down | 1.19     | down | NPAT                   |
| 7980146a      | 1.12E-06 | 1.01    | down | 1.34     | down | 1.10   | down | 1.43     | up   | NPC2                   |
| 8165406a      | 4.08E-05 | 1.32    | down | 1.22     | up   | 1.18   | down | 1.12     | down | NPDC1                  |
| 7912520a      | 5.82E-07 | 2.47    | down | 9.70     | up   | 5.14   | down | 3.11     | down | NPPB                   |
| 8155121a      | 5.60E-10 | 1.49    | up   | 1.37     | down | 1.87   | up   | 1.52     | down | NPR2                   |
| 8104746a      | 1.33E-08 | 1.42    | up   | 18.52    | down | 1.59   | down | 1.94     | up   | NPR3                   |
| 7990253a      | 2.03E-06 | 1.13    | down | 1.69     | down | 1.18   | down | 1.06     | up   | NPTN                   |
| 8002303a      | 2.17E-09 | 1.55    | up   | 1.52     | down | 2.11   | up   | 1.13     | down | NQO1                   |
| 8116610a      | 1.98E-07 | 1.58    | up   | 1.15     | up   | 1.76   | up   | 1.30     | down | NQO2;LOC401233         |
| 8035628a      | 1.14E-05 | 1.01    | up   | 1.58     | down | 1.31   | up   | 1.19     | up   | NR2C2AP;RFXANK         |
| 8103094a      | 8.95E-06 | 1.24    | up   | 2.03     | down | 1.21   | up   | 1.66     | down | NR3C2                  |
| 8164087a      | 2.47E-05 | 1.25    | down | 1.19     | up   | 1.32   | down | 1.07     | down | NR6A1                  |
| 8142270a      | 8.50E-05 | 1.50    | up   | 1.12     | up   | 1.00   | down | 1.01     | up   | NRCAM                  |
| 8145736a      | 5.21E-07 | 1.02    | down | 1.49     | up   | 1.67   | down | 2.35     | up   | NRG1                   |
| 8069553a      | 2.98E-06 | 1.23    | up   | 1.02     | up   | 1.14   | down | 2.63     | up   | NRIP1                  |
| 8169115a      | 1.91E-05 | 1.32    | down | 3.28     | up   | 1.27   | down | 1.03     | down | NRK                    |
| 7932985a      | 4.38E-07 | 1.12    | up   | 1.39     | down | 1.24   | down | 5.04     | up   | NRP1                   |

| Transcript ID | p-value  | Arsenic  |      | Chromium |      | Nickel   |      | Vanadium |      | Gene Symbol  |
|---------------|----------|----------|------|----------|------|----------|------|----------|------|--------------|
|               |          | $\Delta$ | Reg  | $\Delta$ | Reg  | $\Delta$ | Reg  | $\Delta$ | Reg  |              |
| 8047738a      | 2.65E-05 | 1.19     | up   | 1.09     | up   | 1.04     | up   | 2.69     | up   | NRP2         |
| 8060339a      | 1.98E-05 | 1.42     | down | 1.10     | up   | 1.67     | down | 1.11     | down | NRSN2        |
| 8170590a      | 4.97E-07 | 1.05     | down | 1.57     | down | 1.05     | down | 1.31     | up   | NSDHL        |
| 8064438a      | 3.30E-09 | 1.64     | down | 1.14     | up   | 1.83     | down | 1.05     | down | NSFL1C       |
| 8150928a      | 1.91E-05 | 1.19     | down | 1.18     | up   | 1.01     | down | 1.29     | down | NSMAF        |
| 8110894a      | 6.81E-07 | 1.27     | up   | 1.70     | up   | 1.14     | up   | 1.43     | down | NSUN2        |
| 7901219a      | 1.73E-06 | 1.22     | up   | 1.15     | up   | 1.03     | up   | 1.21     | down | NSUN4        |
| 8140020a      | 2.98E-07 | 1.12     | up   | 1.34     | up   | 1.18     | up   | 1.35     | down | NSUN5        |
| 8094759a      | 2.87E-09 | 1.07     | up   | 1.05     | up   | 1.03     | down | 1.83     | down | NSUN7        |
| 8015445a      | 7.04E-09 | 1.11     | up   | 1.42     | up   | 1.13     | up   | 1.59     | down | NT5C3L       |
| 7999598a      | 1.21E-05 | 1.14     | up   | 1.36     | down | 1.06     | up   | 1.35     | up   | NTAN1;PDXDC1 |
| 7953284a      | 6.05E-15 | 1.12     | down | 1.03     | down | 1.14     | down | 4.32     | up   | NTF3         |
| 7945245a      | 1.10E-06 | 1.45     | down | 1.36     | up   | 1.48     | down | 1.63     | up   | NTM          |
| 7965573a      | 1.19E-06 | 1.15     | down | 1.76     | down | 1.47     | up   | 6.01     | up   | NTN4         |
| 7923753a      | 9.45E-06 | 1.08     | up   | 2.00     | down | 1.03     | up   | 1.27     | up   | NUAK2        |
| 7993185a      | 6.91E-06 | 1.23     | up   | 1.51     | up   | 1.00     | down | 1.04     | up   | NUBP1        |
| 7899273a      | 4.91E-05 | 1.06     | up   | 1.31     | up   | 1.04     | down | 1.01     | up   | NUDC         |
| 8152340a      | 6.83E-05 | 1.01     | down | 1.15     | up   | 1.00     | down | 1.59     | down | NUDCD1       |
| 7981566a      | 1.48E-05 | 1.40     | up   | 1.11     | up   | 1.72     | up   | 1.01     | up   | NUDT14       |
| 8082663a      | 4.38E-05 | 1.27     | down | 1.37     | up   | 1.35     | down | 1.03     | down | NUDT16P      |
| 8096251a      | 2.61E-06 | 1.01     | down | 1.42     | down | 1.03     | down | 1.09     | up   | NUDT9        |
| 8036923a      | 5.69E-05 | 1.19     | up   | 1.01     | up   | 1.09     | up   | 1.10     | down | NUMBL        |
| 8124059a      | 4.58E-05 | 1.24     | up   | 1.06     | up   | 1.29     | up   | 1.04     | up   | NUP153       |
| 8111629a      | 4.19E-05 | 1.10     | up   | 1.49     | up   | 1.18     | up   | 1.15     | down | NUP155       |
| 7947991a      | 3.06E-07 | 1.15     | up   | 1.31     | up   | 1.17     | up   | 1.24     | down | NUP160       |
| 8158446a      | 2.77E-05 | 1.35     | down | 1.19     | up   | 1.17     | down | 1.31     | down | NUP188       |
| 8085431a      | 4.19E-09 | 1.97     | down | 3.50     | up   | 1.61     | down | 4.88     | down | NUP210       |
| 8158783a      | 6.23E-05 | 1.21     | down | 1.29     | up   | 1.02     | down | 1.39     | down | NUP214       |
| 8046804a      | 5.01E-05 | 1.23     | up   | 1.24     | up   | 1.13     | up   | 1.19     | down | NUP35        |
| 8073733a      | 1.51E-05 | 1.10     | up   | 1.44     | up   | 1.02     | down | 1.25     | down | NUP50        |
| 8011832a      | 9.37E-05 | 1.03     | down | 1.11     | up   | 1.04     | down | 1.36     | down | NUP88        |
| 7945902a      | 3.14E-06 | 1.11     | up   | 1.26     | up   | 1.00     | down | 1.12     | down | NUP98        |
| 8000574a      | 4.42E-05 | 1.33     | up   | 1.66     | down | 1.12     | up   | 1.33     | up   | NUPR1        |
| 7982889a      | 7.25E-05 | 1.22     | down | 1.33     | down | 1.02     | up   | 1.28     | down | NUSAP1       |
| 7996677a      | 2.96E-07 | 1.04     | up   | 1.34     | down | 1.16     | up   | 1.24     | up   | NUTF2        |
| 7948839a      | 9.79E-05 | 1.06     | up   | 1.23     | up   | 1.07     | down | 1.14     | down | NXF1         |
| 8061368a      | 5.76E-06 | 1.32     | down | 1.16     | up   | 1.49     | down | 1.11     | down | NXT1         |
| 8169352a      | 3.11E-07 | 1.12     | up   | 1.30     | down | 1.20     | up   | 1.21     | down | NXT2         |
| 7958884a      | 6.40E-05 | 1.40     | up   | 1.07     | down | 1.34     | up   | 1.19     | down | OAS1         |
| 7958895a      | 3.85E-08 | 1.42     | up   | 1.01     | up   | 1.57     | up   | 1.35     | down | OAS3         |
| 7989661a      | 9.97E-05 | 1.16     | up   | 1.25     | down | 1.13     | up   | 1.13     | down | OAZ2         |
| 7936134a      | 4.56E-10 | 1.04     | up   | 1.74     | down | 1.16     | up   | 1.99     | up   | OBFC1        |
| 8094974a      | 3.06E-08 | 1.15     | down | 1.48     | down | 1.19     | down | 1.22     | up   | OCIAD1       |
| 8100298a      | 3.85E-06 | 1.12     | down | 2.36     | down | 1.29     | down | 1.02     | down | OCIAD2       |
| 8158269a      | 1.84E-06 | 1.15     | down | 1.37     | up   | 1.04     | up   | 1.30     | down | ODF2         |
| 8109752a      | 2.29E-07 | 1.20     | down | 3.40     | up   | 1.11     | down | 2.04     | down | ODZ2         |
| 8098441a      | 2.30E-07 | 2.61     | down | 1.09     | down | 2.21     | down | 1.07     | up   | ODZ3         |
| 8132592a      | 2.99E-05 | 1.42     | up   | 1.18     | up   | 1.33     | up   | 1.14     | down | OGDH         |
| 7995755a      | 1.91E-05 | 1.07     | up   | 1.04     | down | 1.05     | up   | 1.69     | up   | OGFOD1       |
| 7987636a      | 3.90E-05 | 1.05     | down | 1.17     | down | 1.16     | up   | 1.28     | down | OIP5         |
| 8056812a      | 1.58E-06 | 1.10     | up   | 1.29     | up   | 1.15     | up   | 1.09     | down | OLA1         |
| 7938225a      | 6.62E-05 | 1.33     | up   | 1.13     | down | 1.07     | up   | 1.05     | down | OLFML1       |
| 7921882a      | 2.37E-06 | 1.17     | up   | 1.47     | down | 1.54     | up   | 2.58     | up   | OLFML2B      |

| Transcript ID | p-value  | Arsenic |      | Chromium |      | Nickel |      | Vanadium |      | Gene Symbol     |
|---------------|----------|---------|------|----------|------|--------|------|----------|------|-----------------|
|               |          | Δ       | Reg  | Δ        | Reg  | Δ      | Reg  | Δ        | Reg  |                 |
| 7961142a      | 1.19E-06 | 1.65    | up   | 7.11     | up   | 2.04   | up   | 5.53     | down | OLR1            |
| 8173310a      | 4.05E-06 | 1.17    | up   | 1.63     | down | 1.24   | down | 1.54     | up   | OPHN1           |
| 7925492a      | 3.87E-06 | 1.59    | up   | 1.61     | down | 1.23   | down | 2.66     | up   | OPN3;KMO        |
| 7911231a      | 2.83E-06 | 1.36    | up   | 1.62     | up   | 1.01   | down | 1.44     | down | OR2W3           |
| 7939920a      | 6.62E-05 | 1.16    | up   | 1.12     | down | 1.13   | up   | 1.04     | up   | OR4A13P         |
| 8008718a      | 3.21E-05 | 1.08    | up   | 1.25     | down | 1.06   | up   | 1.02     | up   | OR4D2           |
| 7981781a      | 3.25E-07 | 1.09    | up   | 1.28     | down | 1.41   | up   | 1.03     | down | OR4M2;LOC727924 |
| 7945958a      | 9.17E-05 | 1.10    | down | 1.32     | up   | 1.07   | down | 1.03     | down | OR52B4          |
| 8081196a      | 9.11E-05 | 1.08    | up   | 1.11     | down | 1.06   | up   | 1.03     | up   | OR5H14;OR5H15   |
| 8055645a      | 1.36E-07 | 1.18    | up   | 1.41     | up   | 1.09   | up   | 1.32     | down | ORC4L           |
| 7995354a      | 4.87E-05 | 1.08    | up   | 1.28     | down | 1.19   | up   | 1.55     | up   | ORC6L           |
| 7945831a      | 5.39E-07 | 1.30    | up   | 1.14     | down | 1.52   | up   | 1.08     | down | OSBPL5          |
| 7914923a      | 1.47E-05 | 1.04    | up   | 1.45     | up   | 1.14   | up   | 1.16     | down | OSCP1           |
| 7997533a      | 8.97E-05 | 1.11    | up   | 1.21     | up   | 1.27   | up   | 1.01     | down | OSGIN1          |
| 8172478a      | 1.36E-05 | 1.22    | up   | 1.12     | down | 1.14   | up   | 1.09     | down | OTUD5           |
| 7915257a      | 8.04E-08 | 1.26    | down | 1.25     | up   | 1.36   | down | 1.26     | down | OXCT2           |
| 8078738a      | 1.20E-05 | 1.22    | down | 1.00     | down | 1.36   | down | 1.07     | down | OXSR1           |
| 8085138a      | 4.20E-05 | 1.11    | down | 3.30     | up   | 1.32   | down | 2.84     | down | OXTR            |
| 8011415a      | 1.06E-07 | 1.04    | down | 2.67     | up   | 1.01   | up   | 3.31     | down | P2RX5           |
| 8071489a      | 5.76E-05 | 1.16    | up   | 1.02     | down | 1.19   | up   | 1.23     | up   | P2RX6           |
| 8113981a      | 8.66E-08 | 1.17    | down | 1.34     | down | 1.20   | down | 1.67     | up   | P4HA2           |
| 7950374a      | 7.46E-06 | 1.08    | down | 1.88     | down | 1.09   | down | 1.26     | up   | P4HA3           |
| 7973384a      | 7.44E-06 | 1.21    | up   | 1.10     | down | 1.13   | up   | 1.07     | down | PABPN1          |
| 7941537a      | 7.26E-05 | 1.11    | down | 1.48     | up   | 1.03   | down | 1.02     | up   | PACS1           |
| 7947801a      | 3.24E-06 | 1.43    | up   | 1.07     | down | 1.24   | up   | 1.17     | up   | PACSIN3         |
| 8003758a      | 7.82E-05 | 1.10    | up   | 1.00     | up   | 1.09   | up   | 1.28     | down | PAFAH1B1        |
| 7944042a      | 3.81E-05 | 1.09    | down | 1.24     | up   | 1.00   | down | 1.22     | down | PAFAH1B2        |
| 7913883a      | 5.48E-06 | 1.08    | down | 1.39     | up   | 1.20   | down | 1.15     | up   | PAFAH2          |
| 8151512a      | 3.27E-06 | 1.48    | up   | 1.84     | down | 1.02   | up   | 1.89     | up   | PAG1            |
| 8111974a      | 8.35E-06 | 1.22    | up   | 1.35     | up   | 1.24   | up   | 1.22     | down | PAIP1           |
| 8169389a      | 2.96E-05 | 1.18    | down | 1.71     | down | 1.30   | down | 1.38     | up   | PAK3            |
| 8000329a      | 6.03E-05 | 1.33    | up   | 1.08     | up   | 1.16   | up   | 1.25     | up   | PALB2           |
| 8098263a      | 1.87E-07 | 1.50    | down | 1.67     | down | 1.66   | down | 1.32     | up   | PALLD           |
| 8107133a      | 3.04E-08 | 1.58    | down | 1.27     | down | 1.66   | down | 1.41     | up   | PAM             |
| 7947512a      | 3.27E-08 | 2.55    | down | 1.26     | down | 3.84   | down | 4.58     | up   | PAMR1           |
| 8060722a      | 3.13E-07 | 1.47    | down | 1.11     | up   | 1.48   | down | 1.08     | down | PANK2           |
| 7911730a      | 4.22E-06 | 1.04    | up   | 1.31     | up   | 1.08   | down | 1.11     | up   | PANK4           |
| 8073992a      | 6.19E-07 | 1.09    | up   | 1.16     | up   | 1.29   | up   | 1.18     | down | PANX2           |
| 8106534a      | 6.65E-07 | 1.15    | down | 1.26     | down | 1.02   | up   | 1.48     | up   | PAPD4           |
| 8042119a      | 1.11E-06 | 1.18    | up   | 1.21     | up   | 1.16   | up   | 1.29     | down | PAPOLG          |
| 8102214a      | 4.06E-09 | 1.03    | down | 1.96     | down | 1.27   | down | 1.70     | up   | PAPSS1          |
| 7992775a      | 5.34E-05 | 1.03    | down | 1.05     | down | 1.07   | up   | 1.49     | up   | PAQR4           |
| 8092409a      | 8.48E-05 | 1.26    | up   | 1.25     | up   | 1.07   | up   | 1.22     | down | PARL            |
| 7999562a      | 2.52E-08 | 1.44    | up   | 1.22     | up   | 1.37   | up   | 1.06     | down | PARN            |
| 8143327a      | 5.37E-08 | 1.38    | up   | 1.13     | up   | 1.11   | up   | 1.71     | down | PARP12          |
| 8082100a      | 6.88E-06 | 1.38    | up   | 1.06     | down | 1.38   | up   | 1.81     | down | PARP14          |
| 8080144a      | 3.59E-06 | 1.03    | up   | 1.43     | down | 1.04   | down | 1.69     | up   | PARP3           |
| 7970602a      | 3.13E-05 | 1.07    | down | 1.45     | down | 1.20   | down | 1.23     | up   | PARP4           |
| 7990165a      | 5.74E-06 | 1.09    | up   | 1.47     | down | 1.20   | up   | 1.01     | down | PARP6           |
| 8073662a      | 1.26E-05 | 1.10    | up   | 1.25     | up   | 1.10   | up   | 1.76     | down | PARVB           |
| 8060205a      | 1.43E-05 | 1.09    | up   | 1.17     | up   | 1.38   | up   | 1.01     | up   | PASK            |
| 7965112a      | 1.30E-06 | 1.19    | down | 1.77     | down | 1.04   | up   | 1.36     | up   | PAWR            |
| 7947338a      | 1.64E-10 | 4.04    | down | 3.14     | up   | 2.15   | down | 6.09     | down | PAX6            |



| Transcript ID | Arsenic  |          |      | Chromium |      | Nickel   |      | Vanadium |      | Gene Symbol        |
|---------------|----------|----------|------|----------|------|----------|------|----------|------|--------------------|
|               | p-value  | $\Delta$ | Reg  | $\Delta$ | Reg  | $\Delta$ | Reg  | $\Delta$ | Reg  |                    |
| 7973974a      | 1.05E-05 | 1.20     | down | 1.38     | up   | 1.07     | up   | 2.62     | down | PAX9               |
| 8149955a      | 2.21E-05 | 1.01     | down | 1.49     | down | 1.04     | down | 1.14     | up   | PBK                |
| 7906954a      | 1.75E-06 | 3.05     | up   | 1.17     | down | 2.76     | up   | 2.26     | up   | PBX1               |
| 8125360a      | 1.06E-07 | 1.27     | up   | 1.06     | down | 1.35     | up   | 1.05     | up   | PBX2               |
| 8157890a      | 6.29E-07 | 1.81     | down | 1.32     | up   | 1.23     | down | 1.38     | down | PBX3               |
| 8087806a      | 2.12E-07 | 1.28     | down | 1.52     | down | 1.23     | down | 1.71     | up   | PCBP4              |
| 7969330a      | 3.44E-06 | 1.23     | up   | 1.58     | up   | 1.02     | up   | 1.12     | up   | PCDH17             |
| 8108733a      | 3.00E-05 | 1.05     | up   | 1.02     | up   | 1.56     | up   | 1.60     | down | PCDHB12            |
| 8108753a      | 8.42E-08 | 1.22     | up   | 1.28     | down | 1.40     | up   | 3.51     | down | PCDHB15            |
| 8053187a      | 6.60E-07 | 1.27     | up   | 1.12     | up   | 1.32     | up   | 1.02     | up   | PCGF1              |
| 8063097a      | 6.95E-06 | 1.12     | up   | 1.15     | down | 1.22     | up   | 1.28     | up   | PCIF1              |
| 8140620a      | 3.64E-05 | 1.83     | up   | 1.13     | up   | 1.15     | up   | 1.12     | up   | PCLO               |
| 8064844a      | 8.32E-08 | 1.77     | down | 1.04     | down | 1.64     | down | 1.16     | up   | PCNA               |
| 8134869a      | 5.38E-06 | 1.49     | up   | 1.04     | up   | 1.49     | up   | 1.10     | up   | PCOLCE             |
| 8167103a      | 7.20E-07 | 1.22     | up   | 1.16     | down | 1.17     | up   | 1.03     | down | PCTK1              |
| 8019778a      | 1.43E-06 | 1.26     | up   | 1.12     | down | 1.53     | up   | 1.10     | down | PCYT2              |
| 8141273a      | 4.60E-05 | 1.00     | down | 1.26     | up   | 1.01     | up   | 1.25     | down | PDAP1              |
| 8027642a      | 7.46E-05 | 1.04     | down | 1.48     | up   | 1.27     | down | 1.26     | down | PDCD2L             |
| 8027473a      | 6.06E-05 | 1.14     | down | 1.08     | down | 1.30     | down | 1.20     | up   | PDCD5              |
| 8110858a      | 2.87E-05 | 1.23     | up   | 1.11     | up   | 1.26     | up   | 1.11     | down | PDCD6;LOC728613    |
| 8078479a      | 3.99E-05 | 1.22     | down | 1.21     | down | 1.23     | down | 1.02     | up   | PDCD6IP            |
| 8043902a      | 9.15E-06 | 1.49     | up   | 1.12     | up   | 1.35     | up   | 1.13     | down | PDCL3              |
| 8130674a      | 7.28E-09 | 1.17     | up   | 1.04     | down | 6.55     | up   | 1.02     | down | PDE10A             |
| 8057486a      | 2.63E-05 | 1.41     | up   | 1.10     | down | 1.15     | up   | 1.06     | up   | PDE1A              |
| 8025633a      | 4.94E-07 | 1.37     | down | 1.19     | up   | 1.02     | down | 1.47     | down | PDE4A              |
| 8112220a      | 5.90E-05 | 1.09     | up   | 1.09     | down | 1.47     | up   | 1.13     | up   | PDE4D;LOC653198    |
| 8059731a      | 9.33E-08 | 1.39     | up   | 1.16     | down | 1.34     | up   | 1.15     | up   | PDE6D              |
| 8122222a      | 4.39E-05 | 1.02     | up   | 1.06     | down | 1.10     | up   | 2.18     | up   | PDE7B              |
| 8068833a      | 1.13E-06 | 1.14     | up   | 1.24     | up   | 1.97     | up   | 1.40     | down | PDE9A;LOC100132338 |
| 8137670a      | 2.09E-05 | 1.12     | up   | 1.79     | down | 2.11     | up   | 1.03     | up   | PDGFA;LOC100132080 |
| 8076195a      | 5.81E-06 | 1.19     | down | 1.96     | down | 1.19     | up   | 1.04     | down | PDGFB              |
| 8103399a      | 3.49E-08 | 1.33     | down | 2.17     | down | 1.30     | down | 1.66     | up   | PDGFC              |
| 8144802a      | 1.25E-05 | 2.18     | up   | 1.12     | down | 1.50     | up   | 1.57     | down | PDGFR              |
| 8166335a      | 8.85E-07 | 1.02     | down | 1.45     | up   | 1.20     | down | 1.19     | down | PDHA1              |
| 8088384a      | 3.18E-05 | 1.17     | down | 1.39     | down | 1.34     | down | 1.06     | up   | PDHB               |
| 8050278a      | 1.90E-07 | 1.19     | up   | 1.14     | down | 1.06     | up   | 1.41     | up   | PDIA6              |
| 8040249a      | 2.03E-06 | 1.01     | up   | 1.27     | down | 1.01     | up   | 1.20     | up   | PDIA6;ATP6V1C2     |
| 8166511a      | 5.40E-05 | 1.03     | down | 2.05     | up   | 1.31     | down | 1.17     | down | PDK3               |
| 7935180a      | 1.28E-05 | 1.33     | down | 1.09     | down | 1.28     | down | 1.19     | up   | PDLIM1             |
| 8104022a      | 2.84E-06 | 1.62     | up   | 1.12     | up   | 3.03     | up   | 1.62     | down | PDLIM3             |
| 8107897a      | 1.03E-05 | 1.12     | down | 2.15     | down | 1.12     | down | 1.34     | up   | PDLIM4             |
| 8096489a      | 1.12E-06 | 1.10     | down | 1.71     | down | 1.11     | down | 1.57     | up   | PDLIM5             |
| 8116070a      | 1.31E-07 | 1.10     | down | 1.48     | down | 1.13     | down | 1.55     | up   | PDLIM7             |
| 7998820a      | 1.97E-08 | 1.18     | down | 1.20     | down | 1.43     | down | 2.09     | up   | PDPK1;FLI42627     |
| 7998825a      | 1.43E-06 | 1.00     | down | 1.31     | down | 1.27     | down | 1.31     | up   | PDPK1;PDPK2        |
| 8128626a      | 1.74E-05 | 1.25     | up   | 1.06     | up   | 1.35     | up   | 1.22     | down | PDSS2              |
| 7993433a      | 2.66E-06 | 1.40     | up   | 1.20     | up   | 1.18     | up   | 1.01     | up   | PDXDC1             |
| 8173373a      | 3.55E-06 | 1.10     | up   | 1.31     | down | 1.00     | up   | 1.06     | down | PDZD11             |
| 8104693a      | 4.76E-05 | 1.46     | down | 1.65     | down | 1.62     | down | 1.12     | down | PDZD2              |
| 7936559a      | 1.28E-07 | 1.24     | down | 1.15     | down | 1.41     | down | 1.33     | up   | PDZD8              |
| 7904843a      | 2.85E-07 | 2.16     | down | 1.29     | up   | 3.04     | down | 1.00     | down | PDZK1;PDZK1P1      |
| 7906264a      | 4.49E-07 | 1.38     | up   | 1.81     | down | 1.28     | up   | 1.02     | down | PEAR1              |
| 8134339a      | 1.00E-07 | 1.37     | up   | 3.07     | up   | 1.06     | down | 1.48     | down | PEG10              |

| Transcript ID | p-value  | Arsenic |      | Chromium |      | Nickel |      | Vanadium |      | Gene Symbol |
|---------------|----------|---------|------|----------|------|--------|------|----------|------|-------------|
|               |          | Δ       | Reg  | Δ        | Reg  | Δ      | Reg  | Δ        | Reg  |             |
| 8039607a      | 8.10E-06 | 1.15    | down | 1.18     | up   | 1.01   | up   | 1.09     | up   | PEG3;ZIM2   |
| 8105229a      | 1.07E-05 | 1.21    | down | 1.40     | down | 1.58   | down | 1.35     | up   | PELO;ITGA1  |
| 8011692a      | 1.10E-07 | 1.27    | up   | 1.46     | up   | 1.14   | up   | 1.19     | down | PELP1       |
| 8013120a      | 2.83E-05 | 1.19    | up   | 1.54     | up   | 1.26   | up   | 1.10     | down | PEMT        |
| 8012349a      | 9.46E-06 | 1.05    | up   | 1.37     | down | 1.03   | up   | 1.03     | down | PER1        |
| 8059996a      | 2.94E-05 | 1.35    | up   | 1.27     | down | 1.35   | up   | 1.52     | up   | PER2        |
| 7897378a      | 7.24E-09 | 1.11    | down | 1.72     | down | 1.07   | down | 2.22     | up   | PER3;UTS2   |
| 8129880a      | 3.43E-07 | 2.15    | up   | 4.72     | up   | 5.04   | up   | 1.60     | down | PERP        |
| 7991323a      | 1.99E-08 | 1.25    | up   | 1.18     | up   | 1.34   | up   | 1.25     | down | PEX11A      |
| 7904755a      | 3.02E-05 | 1.03    | up   | 1.39     | down | 1.00   | up   | 1.07     | up   | PEX11B      |
| 8014264a      | 3.77E-07 | 1.30    | up   | 1.21     | up   | 1.31   | up   | 1.50     | down | PEX12       |
| 8042161a      | 1.55E-05 | 1.15    | up   | 1.18     | down | 1.23   | up   | 1.06     | down | PEX13       |
| 7947609a      | 6.01E-05 | 1.21    | up   | 1.24     | up   | 1.21   | up   | 1.02     | down | PEX16       |
| 8004804a      | 6.21E-06 | 1.11    | up   | 1.54     | up   | 1.01   | down | 1.34     | down | PFAS        |
| 8134098a      | 7.70E-06 | 1.63    | down | 3.33     | down | 1.51   | down | 1.07     | up   | PFTK1       |
| 8047467a      | 1.38E-10 | 1.35    | down | 1.24     | up   | 1.18   | down | 3.35     | up   | PFTK2       |
| 7958152a      | 4.46E-08 | 1.10    | down | 1.29     | up   | 1.29   | down | 1.10     | up   | PGAM1;PGAM4 |
| 7965480a      | 1.73E-07 | 1.12    | down | 1.20     | up   | 1.21   | down | 1.07     | up   | PGAM1;PGAM4 |
| 8176282a      | 1.72E-08 | 1.11    | down | 1.17     | up   | 1.18   | down | 1.06     | up   | PGAM4;PGAM1 |
| 7960124a      | 2.82E-05 | 1.08    | up   | 1.37     | up   | 1.14   | up   | 1.10     | down | PGAM5;PXMP2 |
| 7937892a      | 2.07E-07 | 1.49    | up   | 1.01     | down | 1.35   | up   | 1.07     | down | PGAP2       |
| 8117675a      | 2.41E-05 | 1.23    | up   | 1.36     | down | 1.44   | up   | 1.01     | up   | PGBD1       |
| 7911301a      | 5.70E-05 | 1.29    | up   | 1.33     | down | 1.25   | down | 1.13     | up   | PGBD2       |
| 8147469a      | 1.79E-05 | 2.09    | up   | 1.74     | down | 2.89   | up   | 1.18     | down | PGCP        |
| 7980233a      | 4.70E-07 | 1.57    | up   | 2.44     | down | 1.88   | up   | 1.15     | up   | PGF         |
| 7901951a      | 1.73E-06 | 1.07    | down | 1.01     | up   | 1.62   | down | 1.33     | up   | PGM1        |
| 7998759a      | 3.02E-05 | 1.15    | up   | 1.22     | down | 1.02   | down | 1.23     | up   | PGP         |
| 8169617a      | 1.81E-08 | 1.37    | up   | 1.24     | down | 1.11   | up   | 1.06     | up   | PGRMC1      |
| 8122426a      | 1.21E-05 | 1.31    | down | 1.74     | down | 1.25   | down | 1.15     | up   | PHACTR2     |
| 8118682a      | 1.15E-07 | 1.40    | up   | 1.19     | down | 1.58   | up   | 1.14     | up   | PHF1        |
| 8013812a      | 6.11E-05 | 1.29    | up   | 1.27     | up   | 1.19   | up   | 1.29     | down | PHF12       |
| 8167013a      | 3.32E-05 | 1.14    | up   | 1.18     | down | 1.12   | up   | 1.47     | down | PHF16       |
| 8012099a      | 5.06E-07 | 1.37    | up   | 1.11     | up   | 1.03   | up   | 1.27     | down | PHF23;NUP98 |
| 8173551a      | 1.31E-09 | 1.44    | up   | 1.56     | up   | 1.81   | up   | 5.33     | down | PHKA1       |
| 7995382a      | 4.85E-08 | 1.03    | up   | 1.69     | down | 1.10   | up   | 1.86     | up   | PHKB        |
| 7994928a      | 5.46E-11 | 1.59    | up   | 1.15     | up   | 1.41   | up   | 1.03     | down | PHKG2       |
| 7923372a      | 1.64E-07 | 1.03    | down | 1.43     | down | 1.05   | down | 1.65     | up   | PHLDA3      |
| 7984453a      | 5.36E-05 | 1.02    | up   | 1.26     | down | 1.00   | up   | 1.18     | down | PIAS1       |
| 7950838a      | 4.32E-06 | 1.17    | down | 1.18     | down | 1.30   | down | 1.11     | up   | PICALM      |
| 8171418a      | 1.64E-05 | 1.02    | down | 1.37     | up   | 1.19   | down | 1.28     | down | PIGA        |
| 7983811a      | 1.05E-05 | 1.02    | down | 1.64     | down | 1.10   | up   | 1.28     | down | PIGB;CCPG1  |
| 7922330a      | 2.02E-05 | 1.02    | down | 1.57     | down | 1.02   | up   | 1.01     | up   | PIGC        |
| 8005157a      | 2.08E-06 | 1.01    | up   | 1.38     | up   | 1.01   | up   | 1.33     | down | PIGL        |
| 8013641a      | 5.32E-05 | 1.20    | up   | 1.16     | up   | 1.14   | up   | 1.59     | down | PIGS        |
| 8038382a      | 5.75E-05 | 1.41    | down | 1.12     | down | 1.36   | down | 1.06     | up   | PIH1D1      |
| 8075483a      | 7.03E-05 | 1.12    | down | 1.56     | down | 1.18   | down | 1.01     | down | PIK3IP1     |
| 8105778a      | 2.03E-06 | 1.30    | up   | 1.33     | down | 1.08   | up   | 1.79     | up   | PIK3R1      |
| 7915787a      | 6.29E-07 | 1.24    | down | 1.84     | down | 1.18   | down | 2.42     | up   | PIK3R3      |
| 8047865a      | 8.63E-06 | 1.27    | up   | 1.09     | down | 1.22   | up   | 1.06     | down | PIKFYVE     |
| 8119161a      | 6.00E-08 | 1.19    | up   | 1.36     | up   | 1.85   | up   | 1.15     | down | PIM1        |
| 8172471a      | 9.71E-09 | 1.32    | up   | 1.30     | down | 1.24   | up   | 1.20     | down | PIM2        |
| 8073960a      | 9.30E-05 | 1.02    | up   | 1.25     | up   | 1.09   | up   | 1.26     | down | PIM3        |
| 8014723a      | 1.07E-05 | 1.03    | up   | 1.29     | up   | 1.04   | down | 1.42     | down | PIP4K2B     |

| Transcript ID | p-value  | Arsenic |      | Chromium |      | Nickel |      | Vanadium |      | Gene Symbol           |
|---------------|----------|---------|------|----------|------|--------|------|----------|------|-----------------------|
|               |          | Δ       | Reg  | Δ        | Reg  | Δ      | Reg  | Δ        | Reg  |                       |
| 8011077a      | 6.32E-07 | 1.07    | down | 1.34     | up   | 1.05   | down | 1.24     | down | PITPNA                |
| 7967358a      | 1.93E-06 | 1.18    | up   | 1.15     | down | 1.47   | up   | 1.28     | up   | PITPNM2               |
| 7943240a      | 7.89E-05 | 1.02    | up   | 1.23     | up   | 1.10   | down | 1.01     | up   | PIWIL4                |
| 8173340a      | 1.74E-06 | 1.26    | up   | 1.35     | down | 1.01   | up   | 1.13     | down | PJA1                  |
| 8096314a      | 8.66E-06 | 1.07    | down | 1.43     | down | 1.22   | down | 1.40     | up   | PKD2                  |
| 8062852a      | 3.33E-06 | 1.12    | up   | 1.03     | down | 1.46   | up   | 1.13     | up   | PKIG                  |
| 7998886a      | 9.28E-06 | 1.03    | down | 1.03     | down | 1.17   | down | 1.61     | up   | PKMYT1                |
| 8026315a      | 8.81E-05 | 1.10    | up   | 1.13     | up   | 1.29   | up   | 1.34     | down | PKN1                  |
| 7948987a      | 4.38E-05 | 1.67    | up   | 1.13     | up   | 1.72   | up   | 1.52     | down | PLA2G16               |
| 7913235a      | 2.92E-05 | 1.14    | down | 1.08     | up   | 1.16   | down | 1.07     | up   | PLA2G2C               |
| 8056151a      | 2.15E-06 | 1.67    | up   | 1.16     | down | 1.28   | up   | 1.85     | down | PLA2R1                |
| 8129985a      | 3.25E-06 | 1.65    | down | 1.18     | up   | 1.90   | down | 1.63     | up   | PLAGL1                |
| 8150509a      | 5.22E-05 | 1.68    | up   | 2.68     | up   | 1.01   | down | 2.02     | up   | PLAT                  |
| 8037374a      | 4.98E-05 | 1.03    | down | 1.47     | up   | 1.69   | down | 1.48     | up   | PLAUR                 |
| 7961440a      | 8.49E-07 | 1.05    | down | 1.73     | up   | 1.01   | up   | 5.21     | down | PLBD1                 |
| 8060897a      | 3.91E-05 | 2.13    | down | 1.24     | up   | 1.33   | down | 2.87     | down | PLCB4                 |
| 8016168a      | 4.85E-07 | 1.05    | up   | 1.17     | up   | 1.22   | up   | 1.43     | down | PLCD3                 |
| 7929388a      | 6.53E-08 | 1.57    | down | 2.57     | down | 1.51   | down | 2.27     | up   | PLCE1                 |
| 7997453a      | 9.45E-11 | 1.48    | up   | 1.20     | up   | 2.12   | up   | 1.68     | down | PLCG2                 |
| 8176286a      | 2.50E-09 | 1.50    | up   | 2.51     | up   | 1.83   | up   | 2.28     | down | PLCXD1                |
| 8003962a      | 4.19E-09 | 1.45    | up   | 1.09     | up   | 1.47   | up   | 1.30     | down | PLD2                  |
| 8013068a      | 1.36E-07 | 1.25    | up   | 1.75     | up   | 1.15   | up   | 1.18     | down | PLD6                  |
| 7983502a      | 4.47E-06 | 1.09    | up   | 1.32     | down | 1.13   | up   | 1.26     | down | PLDN                  |
| 8153568a      | 9.28E-08 | 1.21    | down | 1.46     | down | 1.08   | down | 1.44     | up   | PLEC1                 |
| 7931081a      | 4.98E-08 | 1.35    | down | 1.47     | down | 1.51   | down | 1.26     | up   | PLEKHA1               |
| 8145977a      | 1.66E-06 | 1.02    | down | 1.57     | down | 1.02   | down | 1.80     | up   | PLEKHA2               |
| 7946781a      | 2.21E-06 | 1.37    | down | 1.41     | up   | 2.28   | down | 1.26     | down | PLEKHA7               |
| 8028656a      | 8.34E-06 | 1.01    | down | 1.55     | down | 1.05   | down | 1.04     | up   | PLEKHG2               |
| 7996516a      | 6.53E-08 | 1.20    | down | 1.69     | down | 1.10   | down | 1.64     | up   | PLEKHG4               |
| 8104141a      | 3.19E-07 | 1.21    | down | 1.01     | up   | 1.28   | down | 1.49     | up   | PLEKHG4B              |
| 8041644a      | 5.56E-05 | 1.54    | up   | 1.12     | down | 1.57   | up   | 1.33     | down | PLEKHH2               |
| 8017675a      | 1.73E-06 | 1.08    | up   | 1.23     | up   | 1.08   | up   | 1.49     | down | PLEKHM1P;LOC100291232 |
| 7905116a      | 9.23E-06 | 1.32    | down | 1.63     | down | 1.30   | down | 1.18     | up   | PLEKHO1               |
| 7984217a      | 1.96E-05 | 1.12    | up   | 1.34     | down | 1.12   | up   | 1.16     | down | PLEKHO2               |
| 8053602a      | 1.69E-05 | 1.19    | down | 1.01     | down | 1.32   | down | 1.02     | down | PLGLB2;PLGLB1;PLGLA   |
| 8112202a      | 1.85E-11 | 2.39    | down | 1.52     | up   | 1.62   | down | 1.04     | down | PLK2                  |
| 8097356a      | 1.59E-05 | 1.11    | down | 1.42     | down | 1.04   | down | 1.06     | down | PLK4                  |
| 8167449a      | 2.49E-06 | 1.06    | up   | 1.31     | down | 1.25   | up   | 1.12     | down | PLP2                  |
| 8083146a      | 8.34E-06 | 1.07    | down | 1.63     | up   | 1.11   | down | 1.34     | down | PLS1                  |
| 8169473a      | 7.65E-07 | 1.07    | up   | 1.66     | down | 1.08   | up   | 1.06     | up   | PLS3                  |
| 8091327a      | 1.07E-05 | 1.49    | up   | 1.01     | up   | 1.59   | up   | 1.55     | down | PLSCR1                |
| 8091306a      | 1.12E-09 | 2.45    | up   | 1.12     | down | 2.87   | up   | 3.41     | down | PLSCR4                |
| 7923991a      | 1.37E-05 | 1.70    | down | 1.41     | down | 1.85   | down | 1.22     | up   | PLXNA2                |
| 8170921a      | 7.51E-08 | 1.27    | down | 1.78     | down | 1.53   | down | 1.40     | up   | PLXNA3                |
| 8067233a      | 2.68E-08 | 1.47    | down | 4.22     | down | 1.08   | up   | 1.68     | up   | PMEP1                 |
| 7993148a      | 1.22E-05 | 1.44    | up   | 1.62     | up   | 1.02   | down | 1.22     | down | PMM2                  |
| 8012896a      | 4.23E-05 | 1.38    | up   | 1.91     | up   | 1.08   | up   | 1.34     | down | PMP22                 |
| 7920567a      | 9.07E-05 | 1.15    | up   | 1.32     | down | 1.04   | down | 1.18     | up   | PMVK                  |
| 8048257a      | 2.73E-09 | 1.45    | up   | 1.07     | up   | 1.52   | up   | 1.22     | down | PNKD                  |
| 7974066a      | 1.41E-06 | 1.21    | up   | 1.16     | up   | 1.30   | up   | 1.19     | down | PNN                   |
| 8073633a      | 1.84E-06 | 1.40    | up   | 1.13     | up   | 1.02   | down | 2.30     | up   | PNPLA3                |
| 8052331a      | 3.71E-06 | 1.17    | up   | 1.20     | up   | 1.12   | up   | 1.33     | down | PNPT1                 |
| 7901535a      | 6.18E-05 | 1.05    | down | 1.25     | up   | 1.25   | down | 1.58     | down | PODN                  |

| Transcript ID | p-value  | Arsenic  |      | Chromium |      | Nickel   |      | Vanadium |      | Gene Symbol           |
|---------------|----------|----------|------|----------|------|----------|------|----------|------|-----------------------|
|               |          | $\Delta$ | Reg  | $\Delta$ | Reg  | $\Delta$ | Reg  | $\Delta$ | Reg  |                       |
| 8082368a      | 2.95E-07 | 1.03     | up   | 1.55     | up   | 1.39     | up   | 2.00     | down | PODXL2                |
| 8070876a      | 3.39E-05 | 1.15     | up   | 1.23     | up   | 1.12     | up   | 1.22     | down | POFUT2                |
| 8166525a      | 6.83E-08 | 1.15     | down | 1.55     | up   | 1.20     | down | 1.20     | down | POLA1                 |
| 8030641a      | 5.65E-05 | 1.21     | down | 1.05     | up   | 1.34     | down | 1.07     | up   | POLD1                 |
| 7949746a      | 9.94E-08 | 1.15     | up   | 1.28     | down | 1.14     | up   | 1.54     | up   | POLD4                 |
| 8013588a      | 1.07E-06 | 1.20     | up   | 1.18     | up   | 1.17     | up   | 1.25     | down | POLDIP2               |
| 8163525a      | 5.46E-05 | 1.08     | up   | 1.32     | up   | 1.07     | up   | 1.42     | down | POLE3                 |
| 8042953a      | 1.32E-07 | 1.27     | up   | 1.06     | down | 1.38     | up   | 1.23     | up   | POLE4                 |
| 7991258a      | 2.32E-05 | 1.16     | up   | 1.34     | down | 1.19     | up   | 1.15     | down | POLG                  |
| 8098958a      | 1.79E-05 | 1.28     | up   | 1.23     | down | 1.16     | up   | 1.22     | down | POLN                  |
| 8053496a      | 4.04E-05 | 1.18     | up   | 1.28     | up   | 1.12     | up   | 1.13     | down | POLR1A                |
| 8044473a      | 2.11E-05 | 1.19     | up   | 1.33     | up   | 1.03     | down | 1.25     | down | POLR1B                |
| 8004431a      | 3.41E-05 | 1.35     | up   | 1.15     | up   | 1.03     | up   | 1.21     | down | POLR2A                |
| 8055089a      | 4.75E-06 | 1.11     | up   | 1.32     | up   | 1.10     | up   | 1.27     | down | POLR2D                |
| 8141791a      | 4.17E-05 | 1.33     | up   | 1.08     | down | 1.62     | up   | 1.09     | down | POLR2J2-4             |
| 7993973a      | 3.97E-07 | 1.32     | up   | 1.27     | up   | 1.11     | up   | 1.27     | down | POLR3E                |
| 8061171a      | 3.26E-07 | 1.87     | down | 1.08     | down | 1.89     | down | 1.09     | down | POLR3F;C20orf12       |
| 8076344a      | 9.12E-07 | 1.22     | up   | 1.49     | up   | 1.02     | down | 1.34     | down | POLR3H                |
| 8032057a      | 1.57E-05 | 1.04     | up   | 1.37     | up   | 1.06     | up   | 1.18     | down | POLRMT                |
| 8133275a      | 8.27E-06 | 1.10     | up   | 1.20     | up   | 1.06     | up   | 1.20     | down | POM121;POM121C;PMS2L3 |
| 8071877a      | 3.22E-05 | 1.10     | down | 1.33     | up   | 1.12     | down | 1.11     | up   | POM121L9P             |
| 8158866a      | 1.16E-06 | 1.16     | down | 1.21     | up   | 1.05     | up   | 1.80     | down | POMT1                 |
| 8147548a      | 7.07E-05 | 1.29     | down | 1.33     | up   | 1.19     | down | 1.30     | down | POP1                  |
| 8089785a      | 3.07E-07 | 1.15     | up   | 1.22     | down | 1.18     | up   | 1.24     | up   | POPDC2                |
| 8133670a      | 5.71E-07 | 1.27     | up   | 1.17     | up   | 1.37     | up   | 1.29     | down | POR                   |
| 8167287a      | 2.76E-05 | 1.11     | down | 1.10     | down | 1.14     | down | 1.92     | up   | PORCN                 |
| 7971077a      | 1.30E-07 | 3.27     | up   | 2.63     | down | 6.16     | up   | 1.42     | up   | POSTN                 |
| 8055153a      | 7.31E-05 | 1.11     | down | 1.21     | up   | 1.01     | down | 1.05     | down | POTEE-H               |
| 8112107a      | 7.88E-10 | 1.46     | down | 1.39     | down | 1.09     | down | 1.83     | up   | PPAP2A;SKIV2L2        |
| 7930980a      | 2.51E-09 | 2.18     | down | 3.09     | down | 2.17     | down | 6.46     | up   | PPAPDC1A              |
| 8118945a      | 3.15E-05 | 1.32     | up   | 1.04     | down | 1.40     | up   | 1.20     | up   | PPARD                 |
| 8008768a      | 4.71E-05 | 1.01     | up   | 1.04     | up   | 1.46     | up   | 1.87     | down | PPM1E                 |
| 7964646a      | 2.73E-05 | 1.65     | up   | 1.08     | down | 2.43     | up   | 1.01     | down | PPM1H                 |
| 7942503a      | 3.04E-08 | 1.21     | down | 1.86     | up   | 1.19     | down | 1.98     | down | PPME1                 |
| 7906688a      | 9.96E-05 | 1.15     | down | 1.44     | down | 1.21     | down | 1.23     | up   | PPOX                  |
| 8177744a      | 1.68E-06 | 1.28     | up   | 1.07     | up   | 1.47     | up   | 1.06     | up   | PPP1R11               |
| 8037563a      | 1.77E-09 | 1.15     | down | 1.49     | down | 1.06     | down | 1.35     | up   | PPP1R13L              |
| 8092959a      | 2.50E-08 | 1.24     | up   | 1.27     | up   | 1.34     | up   | 1.35     | down | PPP1R2                |
| 8180076a      | 6.20E-06 | 1.07     | up   | 1.21     | up   | 1.15     | up   | 1.18     | down | PPP1R2P1              |
| 7934997a      | 2.25E-09 | 1.14     | up   | 1.36     | down | 1.06     | down | 3.67     | up   | PPP1R3C               |
| 7977955a      | 1.18E-06 | 1.31     | up   | 1.14     | down | 1.11     | up   | 1.14     | up   | PPP1R3E;HOMEZ         |
| 8049784a      | 3.00E-05 | 1.31     | up   | 1.03     | down | 1.34     | up   | 1.03     | down | PPP1R7;PASK           |
| 8134351a      | 5.57E-08 | 1.77     | up   | 1.60     | up   | 1.15     | down | 3.06     | down | PPP1R9A               |
| 8016628a      | 1.01E-06 | 1.19     | up   | 1.22     | down | 1.12     | up   | 1.11     | up   | PPP1R9B               |
| 8150126a      | 3.75E-06 | 1.06     | up   | 1.53     | down | 1.14     | down | 1.28     | up   | PPP2CB                |
| 7951614a      | 4.48E-07 | 1.12     | down | 1.19     | up   | 1.13     | down | 1.40     | down | PPP2R1B               |
| 8114900a      | 1.20E-06 | 1.25     | up   | 4.72     | up   | 1.73     | down | 1.71     | down | PPP2R2B               |
| 8176986a      | 1.99E-08 | 1.23     | up   | 1.04     | up   | 1.74     | up   | 1.26     | down | PPP2R3B               |
| 8158523a      | 6.98E-06 | 1.10     | down | 1.20     | up   | 1.11     | up   | 1.39     | down | PPP2R4                |
| 7994756a      | 1.45E-06 | 1.35     | up   | 1.10     | up   | 1.20     | up   | 1.02     | up   | PPP4C                 |
| 7976451a      | 2.57E-05 | 1.05     | down | 1.09     | up   | 1.07     | up   | 1.93     | down | PPP4R4                |
| 8029814a      | 2.25E-06 | 1.13     | down | 1.05     | down | 1.33     | down | 1.09     | up   | PPP5C                 |
| 8164155a      | 1.24E-05 | 1.02     | down | 1.28     | up   | 1.08     | up   | 1.31     | down | PPP6C                 |

| Transcript ID | Arsenic  |      |      | Chromium |      | Nickel |      | Vanadium |      | Gene Symbol           |
|---------------|----------|------|------|----------|------|--------|------|----------|------|-----------------------|
|               | p-value  | Δ    | Reg  | Δ        | Reg  | Δ      | Reg  | Δ        | Reg  |                       |
| 8105633a      | 8.12E-09 | 1.72 | down | 1.17     | down | 1.25   | down | 1.24     | up   | PPWD1                 |
| 7927280a      | 1.98E-05 | 1.19 | up   | 1.39     | down | 1.00   | down | 1.16     | up   | PPYR1                 |
| 8167412a      | 4.51E-06 | 1.18 | up   | 1.07     | down | 1.11   | up   | 1.15     | down | PQBP1                 |
| 8023914a      | 6.38E-05 | 1.07 | up   | 1.23     | up   | 1.15   | up   | 1.19     | down | PQLC1                 |
| 7898556a      | 1.55E-05 | 1.08 | up   | 1.47     | up   | 1.01   | down | 1.05     | up   | PQLC2                 |
| 8040278a      | 9.58E-10 | 2.21 | up   | 1.41     | down | 2.49   | up   | 1.20     | up   | PQLC3                 |
| 8149250a      | 2.39E-07 | 1.00 | up   | 1.51     | down | 1.21   | down | 1.67     | up   | PRAGMIN               |
| 7898070a      | 4.71E-05 | 1.24 | up   | 1.06     | up   | 1.30   | up   | 1.14     | down | PRDM2                 |
| 8096032a      | 4.69E-06 | 1.08 | up   | 1.33     | down | 1.22   | down | 1.50     | up   | PRDM8                 |
| 8166455a      | 1.09E-05 | 1.33 | up   | 1.20     | up   | 1.04   | up   | 1.25     | down | PRDX4                 |
| 7907439a      | 7.62E-07 | 1.01 | up   | 1.27     | up   | 1.02   | up   | 1.11     | down | PRDX6                 |
| 7962375a      | 5.39E-09 | 2.90 | down | 2.60     | down | 5.66   | down | 5.76     | up   | PRICKLE1              |
| 8088550a      | 1.59E-10 | 1.00 | down | 2.18     | down | 1.47   | down | 3.14     | up   | PRICKLE2              |
| 8172561a      | 1.49E-05 | 1.53 | up   | 1.03     | up   | 1.19   | up   | 1.15     | down | PRICKLE3              |
| 7919305a      | 3.18E-08 | 1.32 | down | 1.47     | down | 1.55   | down | 1.65     | up   | PRKAB2                |
| 8143961a      | 4.61E-09 | 1.38 | down | 1.55     | down | 1.35   | down | 1.60     | up   | PRKAG2                |
| 8137675a      | 1.37E-09 | 1.16 | up   | 1.75     | up   | 1.23   | up   | 1.34     | down | PRKAR1B               |
| 8009301a      | 2.38E-05 | 1.05 | up   | 1.01     | up   | 1.13   | down | 1.78     | up   | PRKCA                 |
| 8041763a      | 3.91E-08 | 1.42 | up   | 1.58     | down | 1.17   | up   | 1.29     | up   | PRKCE                 |
| 8051547a      | 1.19E-06 | 1.30 | up   | 1.46     | down | 1.08   | up   | 1.23     | up   | PRKD3                 |
| 8171182a      | 7.07E-11 | 1.62 | up   | 2.19     | up   | 2.53   | up   | 3.76     | down | PRKX                  |
| 8176460a      | 4.54E-07 | 1.26 | down | 1.72     | down | 1.48   | up   | 2.21     | up   | PRKY                  |
| 7938890a      | 2.08E-06 | 1.29 | up   | 1.43     | up   | 1.01   | up   | 1.26     | down | PRMT3                 |
| 8060758a      | 4.93E-06 | 1.53 | down | 1.18     | up   | 1.58   | down | 1.13     | up   | PRNP                  |
| 7992678a      | 1.27E-05 | 1.10 | down | 1.05     | up   | 1.19   | down | 1.18     | up   | PRO0461               |
| 7924817a      | 4.58E-05 | 1.02 | up   | 1.80     | down | 1.15   | down | 1.22     | up   | PRO2012               |
| 8062108a      | 6.59E-06 | 1.05 | down | 1.33     | down | 1.36   | down | 1.68     | up   | PROCR                 |
| 8145854a      | 4.00E-06 | 1.23 | up   | 1.16     | up   | 1.16   | up   | 1.21     | down | PROSC                 |
| 7948476a      | 5.87E-05 | 1.08 | down | 1.25     | up   | 1.16   | down | 1.20     | down | PRPF19                |
| 7903519a      | 8.58E-05 | 1.06 | down | 1.09     | up   | 1.21   | down | 1.12     | down | PRPF38B               |
| 8157283a      | 2.32E-06 | 1.07 | up   | 1.42     | up   | 1.02   | up   | 1.37     | down | PRPF4                 |
| 8169240a      | 4.41E-05 | 1.06 | up   | 1.14     | down | 1.46   | down | 1.18     | up   | PRPS1                 |
| 8166049a      | 7.16E-11 | 1.63 | up   | 1.86     | up   | 1.63   | up   | 1.65     | down | PRPS2                 |
| 8036808a      | 3.65E-07 | 1.31 | up   | 1.25     | up   | 1.28   | up   | 1.03     | down | PRR13;PCBP2           |
| 7994858a      | 3.70E-06 | 1.44 | up   | 1.09     | down | 1.25   | up   | 1.11     | up   | PRR14                 |
| 8107563a      | 2.37E-05 | 1.57 | up   | 1.63     | down | 1.72   | up   | 1.74     | up   | PRR16                 |
| 8117922a      | 1.05E-06 | 1.28 | up   | 1.14     | down | 1.11   | up   | 1.12     | up   | PRR3                  |
| 7939383a      | 1.19E-05 | 1.03 | up   | 1.40     | down | 1.32   | down | 1.29     | up   | PRR5L                 |
| 8166705a      | 7.41E-10 | 1.47 | down | 2.12     | down | 2.87   | down | 1.25     | up   | PRRG1;TSPAN7          |
| 7939150a      | 3.38E-05 | 1.24 | up   | 1.12     | up   | 2.25   | up   | 1.70     | down | PRRG4                 |
| 8102468a      | 6.90E-07 | 3.89 | up   | 2.43     | up   | 1.29   | up   | 1.20     | up   | PRSS12                |
| 8069582a      | 1.31E-08 | 1.66 | down | 1.01     | up   | 1.94   | down | 18.90    | up   | PRSS7                 |
| 7989073a      | 1.64E-08 | 1.30 | up   | 1.38     | up   | 1.75   | up   | 2.59     | down | PRTG                  |
| 8156043a      | 5.80E-06 | 1.34 | down | 1.44     | up   | 1.25   | down | 1.53     | down | PSAT1                 |
| 8149551a      | 4.37E-07 | 1.79 | down | 1.14     | up   | 3.00   | down | 2.17     | up   | PSD3                  |
| 8149555a      | 2.28E-05 | 1.34 | down | 1.05     | down | 2.12   | down | 2.08     | up   | PSD3                  |
| 8037240a      | 8.65E-07 | 1.22 | down | 5.66     | up   | 1.05   | down | 1.50     | down | PSG1                  |
| 8037267a      | 1.35E-05 | 1.49 | up   | 10.91    | up   | 1.12   | down | 3.75     | down | PSG2                  |
| 8037231a      | 1.31E-06 | 1.19 | down | 7.96     | up   | 1.52   | down | 1.89     | down | PSG3                  |
| 8037272a      | 1.81E-06 | 1.01 | down | 7.70     | up   | 1.15   | down | 1.35     | down | PSG3-5;PSG7;PSG8;PSG1 |
| 8037246a      | 2.92E-05 | 1.03 | up   | 1.69     | up   | 1.14   | down | 1.40     | down | PSG6                  |
| 8037251a      | 1.57E-05 | 1.16 | up   | 5.19     | up   | 1.13   | up   | 1.48     | down | PSG3-9;PSG1           |
| 8002133a      | 2.17E-08 | 1.16 | up   | 1.58     | down | 1.16   | up   | 1.12     | up   | PSMB10;CTRL           |

| Transcript ID | Arsenic  |          |      | Chromium |      | Nickel   |      | Vanadium |      | Gene Symbol          |
|---------------|----------|----------|------|----------|------|----------|------|----------|------|----------------------|
|               | p-value  | $\Delta$ | Reg  | $\Delta$ | Reg  | $\Delta$ | Reg  | $\Delta$ | Reg  |                      |
| 8006812a      | 1.91E-06 | 1.03     | up   | 1.14     | up   | 1.06     | up   | 1.54     | down | PSMB3                |
| 8003953a      | 2.20E-05 | 1.13     | up   | 1.17     | up   | 1.15     | up   | 1.17     | down | PSMB6                |
| 8180049a      | 9.17E-07 | 1.34     | up   | 1.52     | down | 1.62     | up   | 1.12     | up   | PSMB8                |
| 7947867a      | 5.52E-07 | 1.22     | up   | 1.17     | up   | 1.22     | up   | 1.16     | down | PSMC3                |
| 8015642a      | 4.51E-06 | 1.09     | down | 1.44     | up   | 1.05     | up   | 1.63     | down | PSMC3IP;MLX          |
| 8006392a      | 3.37E-08 | 1.20     | up   | 1.27     | up   | 1.19     | up   | 1.56     | down | PSMD11               |
| 8006984a      | 7.93E-06 | 1.04     | up   | 1.22     | up   | 1.09     | down | 1.51     | down | PSMD3                |
| 8163795a      | 2.31E-05 | 1.18     | down | 1.33     | up   | 1.08     | down | 1.36     | down | PSMD5                |
| 7997230a      | 2.43E-05 | 1.12     | up   | 1.22     | down | 1.14     | up   | 1.08     | up   | PSMD7                |
| 7978123a      | 6.48E-05 | 1.15     | up   | 1.26     | down | 1.16     | up   | 1.17     | up   | PSME2                |
| 8007397a      | 2.67E-07 | 1.06     | down | 1.48     | up   | 1.12     | down | 1.61     | down | PSME3                |
| 8052149a      | 3.78E-06 | 1.28     | up   | 1.33     | up   | 1.04     | up   | 1.08     | down | PSME4                |
| 8060379a      | 1.53E-05 | 1.54     | down | 1.05     | up   | 1.55     | down | 1.06     | down | PSMF1                |
| 8070330a      | 4.45E-06 | 1.01     | down | 1.28     | up   | 1.18     | down | 1.32     | down | PSMG1                |
| 8116655a      | 1.01E-06 | 1.24     | up   | 1.11     | down | 1.21     | up   | 1.13     | down | PSMG4                |
| 8161632a      | 8.14E-05 | 1.14     | down | 1.06     | down | 1.07     | up   | 1.72     | down | PTAR1                |
| 8106107a      | 8.23E-06 | 1.12     | up   | 1.12     | down | 1.19     | up   | 1.87     | up   | PTCD2                |
| 7915612a      | 1.45E-05 | 1.38     | down | 1.53     | up   | 1.49     | down | 1.13     | up   | PTCH2                |
| 7928959a      | 7.80E-05 | 1.01     | up   | 1.20     | down | 1.04     | down | 1.23     | up   | PTEN                 |
| 7926356a      | 2.57E-06 | 1.41     | up   | 2.02     | up   | 1.13     | up   | 3.44     | down | PTER;C1QL3           |
| 8105067a      | 9.24E-06 | 1.17     | up   | 1.10     | up   | 2.12     | up   | 1.36     | up   | PTGER4               |
| 8164362a      | 1.37E-05 | 1.09     | down | 1.30     | up   | 1.01     | down | 1.15     | down | PTGES2               |
| 7902527a      | 2.21E-05 | 1.92     | up   | 1.59     | down | 1.25     | up   | 2.44     | up   | PTGFR                |
| 8079433a      | 3.48E-06 | 1.31     | down | 1.11     | up   | 1.36     | down | 1.03     | up   | PTH1R                |
| 7962000a      | 1.01E-05 | 1.21     | down | 1.68     | down | 1.05     | down | 1.31     | up   | PTHLH                |
| 8153223a      | 1.33E-07 | 1.09     | down | 1.26     | down | 1.11     | down | 1.34     | up   | PTK2                 |
| 8145490a      | 7.64E-06 | 1.48     | up   | 1.41     | down | 1.20     | up   | 1.20     | up   | PTK2B                |
| 7932420a      | 4.27E-08 | 1.04     | down | 1.99     | down | 1.07     | down | 1.62     | up   | PTPLA                |
| 8160346a      | 4.48E-07 | 1.09     | down | 1.40     | down | 11.04    | down | 1.86     | down | PTPLAD2              |
| 7939818a      | 2.85E-10 | 1.40     | up   | 1.54     | up   | 1.45     | up   | 1.36     | down | PTPMT1               |
| 8045182a      | 6.01E-09 | 1.48     | up   | 1.18     | down | 1.52     | up   | 1.02     | up   | PTPN18               |
| 8022393a      | 5.30E-07 | 1.13     | up   | 1.30     | up   | 1.02     | up   | 1.68     | down | PTPN2                |
| 7980616a      | 5.84E-08 | 1.11     | down | 1.78     | down | 1.37     | down | 1.67     | up   | PTPN21               |
| 7918657a      | 7.36E-08 | 1.12     | up   | 1.05     | down | 1.12     | down | 2.82     | up   | PTPN22               |
| 8163149a      | 5.42E-05 | 1.15     | down | 1.24     | down | 1.15     | up   | 1.88     | down | PTPN3                |
| 8044849a      | 1.03E-06 | 1.13     | up   | 1.29     | down | 1.00     | up   | 1.43     | up   | PTPN4                |
| 7953569a      | 5.13E-06 | 1.24     | up   | 1.05     | down | 1.71     | up   | 1.00     | up   | PTPN6                |
| 8060539a      | 2.84E-06 | 1.61     | down | 1.22     | down | 1.64     | down | 1.21     | up   | PTPRA;VPS16          |
| 7964872a      | 1.68E-05 | 2.34     | down | 1.50     | down | 2.64     | down | 1.32     | up   | PTPRB                |
| 7931353a      | 1.88E-08 | 1.09     | up   | 1.85     | down | 1.04     | up   | 1.73     | up   | PTPRE                |
| 8080810a      | 4.89E-08 | 1.96     | down | 1.71     | down | 2.91     | down | 1.95     | up   | PTPRG                |
| 8032926a      | 5.39E-06 | 1.24     | down | 1.47     | down | 1.03     | up   | 2.43     | up   | PTPRS                |
| 8015635a      | 3.19E-07 | 1.02     | down | 1.33     | up   | 1.10     | down | 1.79     | down | PTRF                 |
| 8164235a      | 8.02E-05 | 1.16     | down | 1.29     | up   | 1.03     | up   | 1.31     | down | PTRH1;TTC16;C9orf117 |
| 7943882a      | 2.18E-06 | 1.34     | down | 1.17     | up   | 1.26     | down | 1.31     | down | PTS                  |
| 8052418a      | 2.32E-05 | 1.24     | up   | 1.27     | up   | 1.21     | up   | 1.32     | down | PUS10                |
| 8029437a      | 2.49E-06 | 1.18     | down | 1.39     | down | 1.44     | down | 1.32     | up   | PVR                  |
| 7952274a      | 1.50E-05 | 1.16     | down | 1.33     | up   | 1.21     | down | 1.04     | down | PVRL1                |
| 8069003a      | 8.06E-06 | 1.19     | up   | 1.55     | up   | 1.04     | up   | 1.38     | down | PWP2                 |
| 7967789a      | 2.61E-05 | 1.15     | down | 1.17     | down | 1.05     | up   | 1.17     | up   | PXMP2                |
| 8151436a      | 8.92E-08 | 1.11     | down | 1.61     | down | 1.11     | up   | 1.08     | up   | PXMP3                |
| 8065719a      | 4.32E-05 | 1.03     | up   | 1.23     | down | 1.27     | up   | 1.19     | up   | PXMP4                |
| 8001030a      | 2.74E-06 | 1.66     | up   | 1.32     | down | 1.32     | down | 2.29     | down | PYCARD               |

| Transcript ID | p-value  | Arsenic |      | Chromium |      | Nickel |      | Vanadium |      | Gene Symbol       |
|---------------|----------|---------|------|----------|------|--------|------|----------|------|-------------------|
|               |          | Δ       | Reg  | Δ        | Reg  | Δ      | Reg  | Δ        | Reg  |                   |
| 8061447a      | 1.23E-07 | 1.75    | down | 1.41     | up   | 1.50   | down | 1.02     | up   | PYGB              |
| 7979085a      | 7.22E-06 | 1.33    | up   | 1.69     | up   | 1.21   | up   | 1.09     | down | PYGL              |
| 7989069a      | 7.53E-07 | 1.09    | down | 1.30     | up   | 1.46   | up   | 1.90     | down | PYGO1             |
| 8005833a      | 4.07E-05 | 1.06    | up   | 1.22     | up   | 1.18   | up   | 1.08     | down | PYY2              |
| 7939158a      | 7.75E-06 | 1.13    | up   | 1.24     | up   | 1.10   | up   | 1.27     | down | QSER1             |
| 7951873a      | 1.14E-07 | 1.09    | down | 1.44     | up   | 1.29   | down | 1.15     | down | QSK               |
| 8165094a      | 9.23E-08 | 1.20    | down | 1.83     | up   | 1.22   | down | 1.48     | down | QSOX2             |
| 8045425a      | 2.23E-06 | 1.31    | up   | 1.07     | up   | 1.22   | up   | 1.15     | down | R3HDM1            |
| 7984289a      | 7.51E-05 | 1.04    | down | 1.33     | down | 1.05   | down | 1.05     | down | RAB11A            |
| 8150225a      | 1.88E-05 | 1.03    | down | 1.52     | down | 1.15   | up   | 1.18     | up   | RAB11FIP1         |
| 8006298a      | 3.22E-05 | 1.13    | up   | 1.12     | up   | 1.44   | up   | 1.06     | up   | RAB11FIP4         |
| 7920422a      | 7.57E-05 | 1.29    | up   | 1.35     | down | 1.08   | up   | 1.19     | up   | RAB13             |
| 7963986a      | 9.57E-05 | 1.13    | up   | 1.41     | down | 1.13   | down | 1.36     | up   | RAB13             |
| 8063607a      | 8.10E-06 | 1.09    | up   | 1.17     | down | 1.02   | up   | 1.26     | up   | RAB22A            |
| 7989023a      | 2.15E-08 | 1.00    | down | 2.62     | down | 1.07   | up   | 1.10     | up   | RAB27A            |
| 8021301a      | 1.30E-06 | 1.71    | up   | 1.11     | down | 1.59   | up   | 3.25     | up   | RAB27B            |
| 7977736a      | 1.84E-06 | 1.35    | up   | 1.33     | down | 1.32   | up   | 1.09     | up   | RAB2B             |
| 8020110a      | 5.87E-06 | 1.02    | down | 1.61     | down | 1.21   | up   | 1.28     | up   | RAB31             |
| 8013753a      | 2.88E-06 | 1.22    | up   | 1.08     | up   | 1.21   | up   | 1.41     | down | RAB34             |
| 7966929a      | 1.02E-05 | 1.19    | up   | 1.16     | up   | 1.24   | up   | 1.14     | down | RAB35             |
| 8071676a      | 7.12E-05 | 1.14    | down | 1.41     | up   | 1.04   | up   | 1.15     | down | RAB36             |
| 7950899a      | 2.28E-05 | 1.83    | up   | 2.08     | up   | 1.42   | down | 1.79     | down | RAB38             |
| 8176230a      | 7.62E-05 | 1.26    | down | 1.15     | up   | 1.26   | down | 1.12     | down | RAB39B            |
| 8034202a      | 2.19E-06 | 1.33    | up   | 1.09     | up   | 1.55   | up   | 1.21     | down | RAB3D             |
| 7957072a      | 9.93E-05 | 1.08    | down | 1.09     | up   | 1.18   | down | 1.77     | down | RAB3IP            |
| 7991917a      | 2.31E-05 | 1.11    | up   | 1.03     | down | 1.10   | down | 1.42     | up   | RAB40C            |
| 8001147a      | 8.44E-06 | 1.63    | up   | 1.06     | up   | 1.58   | up   | 1.07     | down | RAB43;ISY1        |
| 8015545a      | 5.30E-07 | 1.07    | up   | 1.40     | up   | 1.00   | down | 1.38     | down | RAB5C             |
| 8174271a      | 2.40E-05 | 1.24    | down | 1.62     | down | 1.78   | down | 1.29     | up   | RAB9B             |
| 8000616a      | 4.39E-07 | 1.22    | up   | 1.14     | up   | 1.16   | up   | 1.12     | down | RABEP2            |
| 8157843a      | 8.41E-07 | 1.04    | up   | 1.46     | up   | 1.05   | up   | 1.42     | down | RABEPK            |
| 8157700a      | 8.26E-05 | 1.06    | down | 1.30     | up   | 1.04   | down | 1.40     | down | RABGAP1           |
| 7907492a      | 6.62E-05 | 1.37    | down | 1.44     | down | 1.33   | down | 1.05     | up   | RABGAP1L          |
| 8177478a      | 4.27E-06 | 1.02    | down | 1.52     | down | 1.21   | up   | 1.63     | up   | RAD17             |
| 8152477a      | 1.57E-05 | 1.07    | up   | 1.20     | down | 1.20   | up   | 1.07     | down | RAD21             |
| 8060400a      | 8.62E-07 | 1.08    | down | 1.12     | up   | 1.07   | down | 1.17     | up   | RAD21L1;SNPH      |
| 8157125a      | 6.49E-06 | 1.03    | up   | 1.27     | up   | 1.02   | up   | 1.30     | down | RAD23B            |
| 7982792a      | 8.56E-05 | 1.02    | down | 1.54     | down | 1.07   | up   | 1.01     | down | RAD51             |
| 8014199a      | 1.41E-05 | 1.13    | up   | 1.17     | up   | 1.16   | up   | 1.44     | down | RAD51L3           |
| 7905938a      | 6.66E-05 | 1.38    | up   | 1.32     | down | 1.13   | up   | 1.10     | up   | RAG1AP1           |
| 8132406a      | 3.01E-05 | 1.01    | down | 1.09     | down | 1.23   | down | 1.47     | up   | RALA              |
| 8044919a      | 6.73E-06 | 1.26    | up   | 1.11     | down | 1.12   | up   | 1.29     | up   | RALB              |
| 8157949a      | 3.18E-06 | 1.05    | up   | 1.13     | up   | 1.44   | up   | 1.58     | down | RALGPS1           |
| 7907657a      | 4.70E-05 | 1.18    | down | 1.73     | down | 1.37   | down | 1.47     | up   | RALGPS2           |
| 8007348a      | 1.31E-05 | 1.07    | down | 1.07     | up   | 1.46   | down | 1.36     | down | RAMP2             |
| 8160016a      | 3.55E-06 | 1.19    | down | 1.11     | up   | 1.51   | down | 1.15     | up   | RANBP6            |
| 8123989a      | 5.44E-06 | 1.31    | up   | 1.09     | up   | 1.32   | up   | 1.15     | up   | RANBP9            |
| 7903988a      | 1.64E-06 | 1.06    | down | 1.07     | down | 1.42   | down | 1.12     | up   | RAP1A             |
| 8096538a      | 3.69E-08 | 1.39    | down | 1.69     | down | 1.91   | down | 1.45     | up   | RAP1GDS1          |
| 8175169a      | 8.39E-06 | 1.01    | up   | 1.38     | down | 1.08   | down | 1.10     | down | RAP2C             |
| 8098121a      | 5.82E-07 | 1.09    | down | 1.87     | down | 1.35   | down | 1.17     | up   | RAPGEF2           |
| 8007043a      | 7.04E-07 | 1.01    | up   | 1.21     | up   | 1.17   | up   | 1.47     | down | RAPGEFL1          |
| 8078286a      | 7.18E-06 | 2.04    | up   | 1.07     | down | 1.22   | up   | 8.77     | up   | RARB;LOC100130354 |

| Transcript ID | p-value  | Arsenic  |      | Chromium |      | Nickel   |      | Vanadium |      | Gene Symbol       |
|---------------|----------|----------|------|----------|------|----------|------|----------|------|-------------------|
|               |          | $\Delta$ | Reg  | $\Delta$ | Reg  | $\Delta$ | Reg  | $\Delta$ | Reg  |                   |
| 7963631a      | 3.98E-07 | 1.08     | up   | 1.60     | down | 1.04     | up   | 1.42     | up   | RARG              |
| 7940775a      | 2.70E-07 | 1.79     | up   | 1.45     | down | 2.35     | up   | 1.55     | down | RARRES3           |
| 8106784a      | 4.27E-08 | 1.15     | down | 1.92     | down | 1.02     | up   | 1.87     | up   | RASA1             |
| 7907611a      | 6.75E-10 | 1.16     | down | 1.43     | down | 1.38     | down | 1.63     | up   | RASAL2            |
| 8161945a      | 3.83E-05 | 2.04     | down | 1.45     | up   | 1.33     | down | 1.31     | down | RASEF             |
| 7987405a      | 5.73E-05 | 1.37     | up   | 2.03     | up   | 1.52     | up   | 1.73     | down | RASGRP1           |
| 8006562a      | 8.90E-05 | 1.20     | up   | 1.26     | up   | 1.09     | up   | 1.17     | down | RASL10B           |
| 8033969a      | 1.29E-05 | 1.04     | up   | 1.34     | up   | 1.04     | up   | 1.10     | down | RAVER1            |
| 7902023a      | 3.57E-10 | 1.95     | up   | 2.23     | up   | 2.27     | up   | 6.36     | down | RAVER2            |
| 8150757a      | 3.43E-07 | 1.08     | down | 1.27     | up   | 1.08     | up   | 1.85     | down | RB1CC1            |
| 7994161a      | 6.23E-06 | 1.25     | up   | 1.22     | up   | 1.13     | up   | 1.21     | down | RBBP6             |
| 8171516a      | 6.12E-05 | 1.04     | up   | 1.25     | up   | 1.03     | down | 1.05     | down | RBBP7             |
| 8065230a      | 7.31E-06 | 1.72     | down | 1.08     | down | 1.74     | down | 1.30     | up   | RBBP9             |
| 7995631a      | 1.29E-06 | 1.12     | down | 1.57     | down | 1.06     | up   | 1.32     | up   | RBL2              |
| 7941694a      | 5.30E-05 | 1.11     | up   | 1.23     | up   | 1.04     | down | 1.13     | down | RBM14;RBM4        |
| 8117045a      | 5.38E-07 | 1.27     | up   | 1.24     | down | 1.84     | up   | 1.19     | down | RBM24             |
| 8108927a      | 6.46E-05 | 1.03     | down | 1.24     | up   | 1.04     | down | 1.36     | down | RBM27             |
| 8142774a      | 3.81E-05 | 1.14     | up   | 1.34     | up   | 1.09     | down | 1.17     | down | RBM28             |
| 8167234a      | 4.18E-05 | 1.14     | up   | 1.35     | down | 1.02     | up   | 1.20     | down | RBM3              |
| 8046628a      | 6.94E-06 | 1.18     | up   | 1.17     | down | 1.22     | up   | 1.09     | down | RBM45             |
| 8079869a      | 1.62E-05 | 1.24     | down | 1.26     | up   | 1.26     | down | 1.18     | down | RBM5;RBM6         |
| 7944006a      | 4.83E-06 | 1.37     | down | 1.07     | up   | 1.39     | down | 1.18     | down | RBM7              |
| 7956261a      | 7.65E-07 | 1.11     | down | 1.46     | down | 1.02     | down | 1.70     | up   | RBMS2             |
| 8078330a      | 8.24E-09 | 2.11     | down | 2.83     | down | 2.34     | down | 1.48     | up   | RBMS3             |
| 8169920a      | 6.05E-08 | 1.19     | up   | 1.19     | down | 1.06     | up   | 1.21     | down | RBMX2             |
| 7960764a      | 7.85E-05 | 1.16     | down | 1.14     | up   | 1.04     | up   | 1.11     | down | RBP5              |
| 7897522a      | 2.07E-09 | 1.23     | up   | 3.87     | up   | 1.26     | down | 7.60     | down | RBP7              |
| 8094460a      | 7.73E-08 | 1.12     | down | 1.14     | down | 1.50     | down | 1.35     | up   | RBPJ              |
| 8155458a      | 9.81E-06 | 1.23     | down | 1.26     | down | 1.49     | down | 1.17     | up   | RBPJ              |
| 7898957a      | 4.36E-06 | 1.02     | up   | 1.12     | down | 1.02     | down | 1.46     | up   | RCAN3             |
| 7971573a      | 9.21E-09 | 1.31     | up   | 1.56     | down | 1.14     | up   | 1.31     | up   | RCBTB2            |
| 7899462a      | 7.88E-10 | 1.12     | up   | 1.55     | up   | 1.03     | up   | 1.32     | down | RCC1;SNHG3-RCC1   |
| 8101013a      | 5.74E-05 | 1.05     | down | 1.22     | down | 1.35     | down | 1.34     | up   | RCHY1             |
| 7939120a      | 3.41E-05 | 1.08     | up   | 1.39     | up   | 1.03     | down | 1.12     | down | RCN1;LOC100190939 |
| 8179913a      | 8.71E-09 | 1.28     | up   | 1.04     | down | 1.46     | up   | 1.01     | up   | RDBP              |
| 8050474a      | 1.28E-05 | 1.36     | up   | 1.03     | up   | 1.01     | up   | 1.04     | down | RDH14;NT5C1B      |
| 8014326a      | 2.31E-05 | 1.11     | up   | 1.03     | down | 1.09     | up   | 1.67     | down | RDM1              |
| 8155169a      | 6.97E-06 | 1.00     | down | 1.28     | down | 1.73     | down | 1.15     | up   | RECK              |
| 8099797a      | 4.44E-06 | 1.11     | up   | 1.29     | down | 1.01     | up   | 1.29     | up   | RELL1;C4orf19     |
| 8141950a      | 1.65E-06 | 1.00     | up   | 1.09     | up   | 1.01     | up   | 1.40     | down | RELN              |
| 8137225a      | 1.82E-06 | 1.01     | up   | 1.45     | up   | 1.09     | up   | 1.25     | down | REPIN1            |
| 8166243a      | 6.06E-06 | 2.03     | up   | 1.34     | up   | 2.51     | up   | 1.36     | down | REPS2             |
| 7897078a      | 9.08E-09 | 1.20     | up   | 1.12     | up   | 1.13     | up   | 1.12     | down | RER1              |
| 8053406a      | 3.79E-05 | 1.21     | up   | 1.27     | down | 1.10     | up   | 1.45     | up   | RETSAT            |
| 7944011a      | 4.74E-06 | 1.16     | down | 1.23     | up   | 1.35     | down | 1.23     | down | REXO2             |
| 8164907a      | 2.11E-06 | 1.00     | down | 1.50     | up   | 1.01     | down | 1.46     | down | REXO4             |
| 7959052a      | 1.59E-05 | 1.05     | up   | 1.42     | up   | 1.21     | up   | 1.01     | down | RFC5              |
| 8106978a      | 3.04E-07 | 1.01     | down | 1.36     | down | 1.40     | up   | 1.87     | up   | RFESD;SPATA9      |
| 8161857a      | 6.88E-06 | 1.09     | up   | 1.33     | up   | 1.14     | up   | 1.39     | down | RFK               |
| 8002762a      | 7.83E-05 | 1.07     | up   | 1.23     | down | 1.23     | up   | 1.20     | up   | RFWD3             |
| 7919971a      | 1.60E-06 | 1.31     | down | 1.67     | down | 1.38     | down | 1.23     | up   | RFX5              |
| 7989132a      | 5.63E-05 | 1.12     | up   | 1.75     | down | 1.06     | up   | 1.03     | down | RFX7              |
| 8101916a      | 4.79E-05 | 1.13     | up   | 1.03     | down | 1.03     | up   | 1.70     | down | RG9MTD2           |



| Transcript ID | p-value  | Arsenic |      | Chromium |      | Nickel |      | Vanadium |      | Gene Symbol         |
|---------------|----------|---------|------|----------|------|--------|------|----------|------|---------------------|
|               |          | Δ       | Reg  | Δ        | Reg  | Δ      | Reg  | Δ        | Reg  |                     |
| 7908125a      | 1.97E-08 | 1.38    | down | 1.55     | down | 2.40   | down | 1.81     | up   | RGL1                |
| 8180144a      | 1.38E-09 | 1.56    | up   | 1.34     | down | 1.80   | up   | 1.50     | up   | RGL2                |
| 8106210a      | 1.35E-06 | 1.12    | down | 1.26     | down | 1.29   | up   | 1.70     | up   | RGNEF               |
| 8093764a      | 7.77E-07 | 1.09    | down | 1.45     | down | 1.02   | up   | 1.09     | up   | RGS12               |
| 7925457a      | 2.78E-05 | 1.21    | down | 2.50     | up   | 1.84   | up   | 1.48     | down | RGS7                |
| 8009277a      | 1.54E-08 | 1.10    | up   | 1.35     | down | 2.61   | up   | 1.20     | down | RGS9                |
| 7998136a      | 4.52E-08 | 1.18    | down | 1.39     | down | 1.32   | down | 1.56     | up   | RHBDF1              |
| 8018731a      | 9.08E-05 | 1.31    | up   | 1.07     | up   | 1.46   | up   | 1.07     | up   | RHBDF2              |
| 7963009a      | 3.76E-07 | 1.04    | up   | 1.29     | up   | 1.77   | up   | 2.33     | down | RHEBL1              |
| 8040473a      | 4.19E-09 | 1.10    | down | 2.39     | down | 1.07   | down | 1.50     | up   | RHOB                |
| 7933821a      | 6.28E-05 | 1.40    | up   | 1.20     | down | 2.18   | down | 1.71     | down | RHOBTB1             |
| 8106986a      | 1.71E-05 | 1.07    | down | 1.91     | down | 1.56   | up   | 1.65     | up   | RHOBTB3             |
| 7918593a      | 1.24E-05 | 1.14    | up   | 1.06     | down | 1.06   | up   | 1.21     | up   | RHOC                |
| 8006345a      | 4.43E-07 | 1.18    | up   | 1.12     | up   | 1.24   | up   | 1.62     | down | RHOT1               |
| 8111698a      | 3.95E-06 | 1.32    | up   | 1.47     | up   | 1.52   | up   | 1.46     | down | RICTOR              |
| 8061247a      | 2.52E-05 | 1.19    | down | 1.33     | up   | 1.08   | down | 1.19     | up   | RIN2                |
| 7976292a      | 4.89E-06 | 1.36    | up   | 1.11     | down | 1.28   | up   | 1.33     | up   | RIN3                |
| 8178244a      | 2.11E-08 | 1.37    | up   | 1.24     | down | 1.41   | up   | 1.31     | up   | RING1               |
| 8113286a      | 6.87E-05 | 1.05    | up   | 1.48     | down | 1.04   | down | 1.57     | up   | RIOK2               |
| 8147206a      | 8.53E-06 | 1.37    | up   | 1.10     | up   | 1.56   | up   | 1.11     | down | RIPK2               |
| 8070489a      | 3.90E-06 | 1.08    | up   | 2.17     | down | 1.85   | up   | 2.34     | up   | RIPK4               |
| 7977596a      | 1.87E-05 | 1.15    | up   | 1.12     | down | 1.00   | up   | 1.08     | down | RNASE9              |
| 8050079a      | 2.57E-06 | 1.28    | up   | 1.16     | down | 1.21   | up   | 1.61     | up   | RNASEH1             |
| 7969179a      | 1.76E-05 | 1.16    | down | 1.23     | down | 1.47   | down | 1.28     | up   | RNASEH2B            |
| 8004237a      | 5.07E-05 | 1.17    | up   | 1.06     | up   | 1.10   | up   | 1.10     | down | RNASEK              |
| 8130768a      | 1.58E-06 | 1.06    | up   | 1.38     | up   | 1.53   | up   | 1.42     | down | RNAS22;LOC100131869 |
| 7904830a      | 2.69E-07 | 1.14    | down | 1.71     | down | 1.43   | down | 1.40     | up   | RNF115              |
| 8020806a      | 2.24E-07 | 1.16    | up   | 1.50     | up   | 1.09   | up   | 1.35     | down | RNF125              |
| 8083310a      | 4.20E-05 | 1.03    | down | 1.19     | up   | 1.15   | up   | 1.55     | down | RNF13               |
| 8006229a      | 3.43E-05 | 1.38    | up   | 1.16     | up   | 1.43   | up   | 1.12     | down | RNF135              |
| 8054329a      | 2.51E-05 | 1.14    | up   | 1.38     | up   | 1.01   | down | 1.02     | down | RNF149              |
| 8102938a      | 6.28E-05 | 2.14    | up   | 1.86     | down | 1.87   | up   | 1.61     | down | RNF150              |
| 8003348a      | 2.01E-09 | 1.52    | up   | 1.20     | up   | 1.73   | up   | 1.23     | down | RNF166              |
| 8105585a      | 8.00E-05 | 1.04    | up   | 1.08     | up   | 1.08   | down | 2.55     | down | RNF180              |
| 8043209a      | 3.30E-06 | 1.32    | up   | 1.04     | up   | 1.23   | up   | 1.04     | down | RNF181              |
| 8152041a      | 3.52E-05 | 1.03    | down | 1.31     | down | 1.11   | up   | 1.11     | down | RNF19A              |
| 8156945a      | 9.08E-05 | 1.18    | up   | 1.44     | up   | 1.06   | up   | 1.57     | down | RNF20               |
| 8010454a      | 3.23E-07 | 1.34    | up   | 1.25     | down | 1.74   | up   | 1.34     | down | RNF213;LOC100294362 |
| 7944096a      | 3.91E-06 | 1.08    | down | 1.33     | up   | 1.19   | down | 1.14     | down | RNF214              |
| 7900979a      | 3.34E-05 | 1.20    | down | 1.01     | up   | 1.21   | down | 1.13     | down | RNF220              |
| 8058985a      | 3.39E-06 | 1.49    | up   | 1.01     | up   | 1.24   | up   | 1.01     | up   | RNF25               |
| 7944510a      | 8.48E-08 | 1.03    | up   | 1.35     | up   | 1.18   | up   | 1.36     | down | RNF26               |
| 8137566a      | 2.72E-05 | 1.28    | down | 1.09     | up   | 1.13   | down | 1.14     | up   | RNF32               |
| 7994939a      | 3.34E-07 | 1.65    | up   | 1.25     | up   | 1.31   | up   | 1.06     | up   | RNF40               |
| 8016994a      | 2.05E-05 | 1.13    | down | 1.12     | up   | 1.07   | down | 1.27     | up   | RNF43               |
| 8083119a      | 5.40E-05 | 1.19    | up   | 1.05     | up   | 1.16   | up   | 1.24     | down | RNF7                |
| 8119184a      | 2.94E-06 | 1.01    | up   | 1.35     | up   | 1.15   | up   | 1.33     | down | RNF8                |
| 8017162a      | 2.10E-06 | 1.26    | up   | 1.19     | down | 1.40   | up   | 1.13     | down | RNFT1               |
| 7945420a      | 1.43E-05 | 1.31    | up   | 1.11     | up   | 1.24   | up   | 1.07     | up   | RNH1;FLJ23519       |
| 7934885a      | 5.64E-10 | 1.40    | down | 1.43     | down | 3.48   | down | 1.37     | up   | RNLS                |
| 8003621a      | 8.53E-06 | 1.36    | up   | 1.48     | up   | 1.05   | up   | 1.30     | down | RNMTL1              |
| 8049689a      | 4.35E-06 | 1.30    | up   | 1.18     | down | 1.53   | up   | 1.06     | up   | RNPEPL1             |
| 7948894a      | 7.59E-07 | 1.18    | up   | 3.21     | down | 1.00   | up   | 2.14     | up   | RNU2-1;RNU2-2;WDR74 |

| Transcript ID | p-value  | Arsenic  |      | Chromium |      | Nickel   |      | Vanadium |      | Gene Symbol          |
|---------------|----------|----------|------|----------|------|----------|------|----------|------|----------------------|
|               |          | $\Delta$ | Reg  | $\Delta$ | Reg  | $\Delta$ | Reg  | $\Delta$ | Reg  |                      |
| 7967028a      | 1.85E-06 | 1.29     | up   | 2.13     | down | 1.27     | up   | 1.43     | up   | RNU4-2               |
| 7906072a      | 1.43E-06 | 1.21     | up   | 1.36     | down | 1.11     | down | 1.03     | down | ROBLD3               |
| 8050302a      | 7.92E-07 | 1.26     | up   | 1.53     | down | 1.08     | up   | 1.32     | up   | ROCK2                |
| 8163402a      | 8.45E-07 | 1.36     | down | 1.09     | up   | 1.21     | down | 1.47     | down | ROD1                 |
| 7999217a      | 1.38E-06 | 1.09     | up   | 1.41     | down | 1.11     | down | 1.45     | up   | ROGDI                |
| 7901969a      | 3.74E-08 | 1.37     | down | 1.09     | down | 1.95     | down | 1.56     | up   | ROR1                 |
| 7898084a      | 4.00E-07 | 1.12     | down | 1.45     | up   | 1.16     | down | 1.19     | down | RP1-21O18.1          |
| 8064868a      | 8.71E-07 | 2.38     | down | 1.96     | down | 2.82     | down | 1.00     | up   | RP5-1022P6.2         |
| 8169949a      | 4.18E-06 | 1.20     | down | 8.20     | up   | 1.71     | down | 1.49     | down | RP6-213H19.1         |
| 8003679a      | 9.84E-05 | 1.08     | up   | 1.19     | up   | 1.04     | up   | 1.16     | down | RPA1                 |
| 7987675a      | 6.20E-05 | 1.22     | up   | 1.01     | up   | 1.12     | up   | 1.24     | down | RPAP1                |
| 8172056a      | 7.31E-06 | 1.18     | down | 1.29     | down | 1.43     | down | 1.34     | up   | RPGR                 |
| 8001423a      | 3.98E-05 | 1.25     | down | 1.03     | down | 1.27     | down | 1.37     | up   | RPGRIP1L             |
| 8043413a      | 1.36E-06 | 1.25     | up   | 1.41     | up   | 1.09     | up   | 1.41     | down | RPIA                 |
| 8034416a      | 1.92E-07 | 1.24     | down | 1.46     | down | 1.34     | down | 1.19     | up   | RPL10                |
| 8170859a      | 8.15E-06 | 1.27     | down | 1.96     | down | 1.37     | down | 1.25     | up   | RPL10                |
| 8109821a      | 1.69E-07 | 1.10     | down | 1.15     | down | 1.13     | down | 1.07     | up   | RPL10;LOC100292492   |
| 8030351a      | 1.15E-06 | 1.09     | down | 1.07     | up   | 1.11     | down | 1.03     | down | RPL13A;RPL13AP5      |
| 7954063a      | 2.23E-05 | 1.19     | down | 1.14     | up   | 1.26     | down | 1.04     | down | RPL13AP20            |
| 7903582a      | 2.28E-05 | 1.09     | down | 1.11     | up   | 1.05     | down | 1.19     | down | RPL17                |
| 8131661a      | 3.88E-05 | 1.25     | down | 1.21     | down | 1.47     | down | 1.17     | up   | RPL21;RPL21P28       |
| 7924144a      | 1.31E-05 | 1.30     | down | 1.34     | down | 1.59     | down | 1.21     | up   | RPL21P28             |
| 8014749a      | 2.65E-05 | 1.10     | down | 1.28     | up   | 1.23     | down | 1.54     | down | RPL23;SNORA21        |
| 8007441a      | 1.73E-06 | 1.14     | down | 1.44     | up   | 1.09     | down | 1.39     | down | RPL27                |
| 7938286a      | 4.25E-05 | 1.21     | up   | 1.64     | up   | 1.23     | up   | 1.24     | down | RPL27A               |
| 8085407a      | 3.53E-05 | 1.38     | down | 1.01     | down | 1.48     | down | 1.11     | down | RPL32;SNORA7A        |
| 8085026a      | 3.81E-05 | 1.07     | down | 1.16     | up   | 1.01     | down | 1.12     | down | RPL35A               |
| 7986765a      | 7.67E-05 | 1.08     | down | 1.09     | up   | 1.11     | down | 1.03     | up   | RPL5                 |
| 8109222a      | 3.06E-05 | 1.21     | down | 1.06     | up   | 1.13     | down | 1.08     | down | RPL7                 |
| 8022972a      | 2.31E-05 | 1.35     | down | 1.26     | up   | 1.17     | down | 1.27     | down | RPL7A                |
| 7966996a      | 4.26E-05 | 1.12     | down | 1.05     | down | 1.07     | down | 1.03     | up   | RPLP0                |
| 8080773a      | 5.19E-05 | 1.12     | down | 1.10     | down | 1.30     | down | 1.25     | up   | RPP14                |
| 8117881a      | 1.73E-05 | 1.26     | up   | 1.02     | up   | 1.53     | up   | 1.05     | up   | RPP21;TRIM39;TRIM39R |
| 8179097a      | 4.05E-07 | 1.23     | up   | 1.00     | down | 1.34     | up   | 1.04     | down | RPP21;TRIM39;TRIM39R |
| 7929116a      | 4.79E-07 | 1.20     | down | 1.21     | up   | 1.27     | down | 1.14     | down | RPP30                |
| 8013348a      | 9.98E-05 | 1.04     | down | 1.00     | up   | 1.18     | down | 1.15     | up   | RPS2                 |
| 8172154a      | 3.72E-05 | 1.03     | down | 1.01     | up   | 1.17     | down | 1.26     | up   | RPS2                 |
| 7950626a      | 7.93E-05 | 1.09     | down | 1.07     | up   | 1.20     | down | 1.47     | down | RPS20P27             |
| 8112961a      | 1.68E-06 | 1.14     | down | 1.46     | down | 1.10     | down | 1.44     | up   | RPS23                |
| 7928551a      | 5.98E-07 | 1.44     | down | 1.57     | up   | 1.50     | down | 1.31     | down | RPS24                |
| 7952129a      | 1.95E-06 | 1.14     | down | 1.14     | up   | 1.06     | down | 1.17     | down | RPS25                |
| 7989493a      | 1.44E-05 | 1.07     | down | 1.41     | down | 1.04     | down | 1.50     | up   | RPS27L               |
| 7942824a      | 9.61E-08 | 1.22     | up   | 1.03     | down | 1.24     | up   | 1.03     | up   | RPS28                |
| 8131869a      | 4.19E-05 | 1.05     | up   | 1.11     | down | 1.03     | down | 1.16     | up   | RPS2P32              |
| 7988031a      | 7.51E-05 | 1.28     | down | 1.20     | down | 1.15     | down | 1.23     | up   | RPS3A                |
| 8176375a      | 1.16E-09 | 3.28     | down | 28.36    | down | 2.95     | up   | 78.72    | up   | RPS4Y1               |
| 8176730a      | 3.55E-09 | 1.03     | down | 1.96     | down | 1.35     | up   | 1.84     | up   | RPS4Y2               |
| 8031933a      | 5.48E-05 | 1.19     | down | 1.17     | up   | 1.40     | down | 1.06     | down | RPS5                 |
| 8130739a      | 1.19E-08 | 1.29     | up   | 2.02     | down | 1.44     | up   | 1.86     | up   | RPS6KA2              |
| 8171762a      | 1.30E-07 | 1.06     | up   | 1.36     | up   | 1.15     | down | 1.24     | down | RPS6KA3              |
| 8008887a      | 1.50E-06 | 1.10     | up   | 1.06     | up   | 1.04     | up   | 1.34     | down | RPS6KB1              |
| 7901038a      | 5.51E-05 | 1.09     | down | 1.12     | up   | 1.10     | down | 1.02     | down | RPS8                 |
| 8027354a      | 9.50E-07 | 1.38     | up   | 1.96     | up   | 1.76     | up   | 3.24     | down | RPSAP58              |

| Transcript ID | p-value  | Arsenic |      | Chromium |      | Nickel |      | Vanadium |      | Gene Symbol   |
|---------------|----------|---------|------|----------|------|--------|------|----------|------|---------------|
|               |          | Δ       | Reg  | Δ        | Reg  | Δ      | Reg  | Δ        | Reg  |               |
| 7982753a      | 3.31E-06 | 1.28    | up   | 1.07     | down | 1.25   | up   | 1.29     | down | RPUSD2        |
| 7952549a      | 6.21E-07 | 1.04    | up   | 1.05     | down | 1.13   | up   | 1.58     | down | RPUSD4        |
| 8048340a      | 6.64E-09 | 1.22    | up   | 1.12     | up   | 1.24   | up   | 1.12     | down | RQCD1         |
| 8128123a      | 1.59E-05 | 1.55    | down | 2.01     | up   | 1.40   | up   | 4.66     | down | RRAGD         |
| 8038407a      | 2.71E-07 | 1.08    | down | 1.64     | down | 1.07   | down | 1.48     | up   | RRAS          |
| 7946697a      | 4.90E-05 | 1.02    | down | 1.10     | up   | 1.22   | down | 1.27     | up   | RRAS2         |
| 8065136a      | 6.48E-07 | 1.33    | down | 1.09     | up   | 1.58   | down | 1.20     | up   | RRBP1         |
| 8068938a      | 5.00E-06 | 1.14    | up   | 1.36     | up   | 1.01   | down | 1.28     | down | RRP1          |
| 7935425a      | 6.33E-08 | 1.03    | down | 1.72     | up   | 1.20   | down | 1.52     | down | RRP12         |
| 8068902a      | 1.36E-07 | 1.02    | up   | 1.50     | up   | 1.07   | down | 1.36     | down | RRP1B         |
| 7999520a      | 1.63E-07 | 1.32    | up   | 1.69     | up   | 1.04   | up   | 1.30     | down | RSL1D1        |
| 7995994a      | 2.82E-06 | 1.06    | down | 1.43     | down | 1.16   | down | 1.54     | up   | RSPRY1        |
| 7932311a      | 1.43E-06 | 1.22    | down | 1.42     | down | 1.25   | down | 1.34     | up   | RSU1          |
| 8053142a      | 1.27E-07 | 1.77    | up   | 1.10     | up   | 1.63   | up   | 1.80     | up   | RTKN          |
| 8037594a      | 1.98E-05 | 1.33    | up   | 1.22     | down | 1.03   | up   | 1.06     | up   | RTN2          |
| 8128606a      | 1.72E-06 | 1.31    | up   | 1.23     | up   | 1.40   | up   | 1.19     | down | RTN4IP1       |
| 8095545a      | 3.56E-05 | 1.13    | up   | 1.35     | down | 1.09   | down | 1.19     | up   | RUFY3         |
| 8007435a      | 5.43E-08 | 1.05    | down | 1.64     | up   | 1.04   | down | 1.49     | down | RUNDC1        |
| 7993274a      | 9.28E-05 | 1.57    | up   | 1.30     | up   | 1.15   | up   | 1.05     | down | RUNDC2A       |
| 7994576a      | 4.99E-05 | 1.67    | up   | 1.07     | up   | 1.21   | up   | 1.05     | down | RUNDC2A-C     |
| 8120043a      | 2.31E-05 | 1.20    | down | 1.50     | up   | 1.19   | down | 1.55     | up   | RUNX2         |
| 7913805a      | 4.76E-06 | 1.18    | up   | 1.49     | up   | 1.33   | up   | 1.32     | down | RUNX3         |
| 8030113a      | 4.84E-06 | 1.14    | down | 1.26     | up   | 1.22   | down | 1.13     | down | RUVBL2        |
| 8178903a      | 2.05E-05 | 1.14    | up   | 1.26     | up   | 1.43   | up   | 1.25     | up   | RXRБ          |
| 8180111a      | 5.49E-06 | 1.33    | up   | 1.24     | up   | 1.54   | up   | 1.28     | up   | RXRБ          |
| 7920123a      | 8.28E-07 | 1.06    | down | 1.16     | down | 1.12   | down | 1.14     | up   | S100A10       |
| 7920128a      | 4.96E-09 | 1.11    | down | 1.56     | down | 1.26   | down | 1.56     | up   | S100A11       |
| 7920291a      | 4.19E-09 | 1.06    | down | 1.36     | down | 1.34   | down | 1.95     | up   | S100A16       |
| 7920285a      | 7.34E-05 | 1.19    | down | 1.20     | down | 1.25   | down | 1.54     | up   | S100A2        |
| 7920258a      | 2.25E-05 | 1.09    | down | 1.22     | down | 1.30   | down | 1.49     | up   | S100A6        |
| 7903393a      | 6.12E-10 | 1.63    | down | 1.48     | up   | 2.23   | down | 2.22     | up   | S1PR1         |
| 8156278a      | 3.23E-07 | 1.44    | up   | 1.54     | down | 1.54   | up   | 1.10     | up   | S1PR3;C9orf47 |
| 8029884a      | 8.02E-05 | 1.16    | down | 1.09     | up   | 1.11   | down | 1.04     | up   | SAE1          |
| 8024936a      | 5.45E-06 | 1.03    | down | 1.34     | up   | 1.06   | down | 1.10     | down | SAFB          |
| 8032974a      | 1.23E-06 | 1.01    | down | 1.28     | up   | 1.14   | down | 1.05     | down | SAFB2         |
| 8067792a      | 6.54E-05 | 1.11    | down | 1.27     | up   | 1.14   | down | 1.09     | down | SAMD10        |
| 8152506a      | 2.02E-07 | 1.32    | down | 6.51     | up   | 1.03   | up   | 2.06     | down | SAMD12        |
| 7974425a      | 4.51E-05 | 1.05    | up   | 1.38     | down | 1.36   | down | 1.29     | up   | SAMD4A        |
| 7928516a      | 4.13E-05 | 1.20    | up   | 1.16     | down | 1.06   | down | 1.25     | down | SAMD8         |
| 8109428a      | 9.65E-07 | 1.01    | up   | 1.24     | down | 1.38   | up   | 1.29     | down | SAP30L        |
| 8005865a      | 2.89E-05 | 1.17    | down | 1.68     | up   | 1.26   | down | 1.32     | down | SARM1;TMEM199 |
| 7903619a      | 5.62E-06 | 1.02    | down | 1.18     | up   | 1.13   | down | 1.06     | up   | SARS          |
| 8036656a      | 6.10E-07 | 1.11    | down | 1.34     | up   | 1.13   | down | 1.32     | down | SARS2;MRPS12  |
| 7941478a      | 3.52E-05 | 1.24    | up   | 1.31     | up   | 1.12   | up   | 1.19     | down | SART1         |
| 7966098a      | 8.70E-06 | 1.06    | up   | 1.30     | up   | 1.15   | up   | 1.12     | down | SART3         |
| 8012247a      | 3.68E-07 | 1.61    | up   | 1.32     | up   | 1.25   | up   | 1.34     | down | SAT2          |
| 8085716a      | 1.19E-09 | 1.18    | down | 4.55     | up   | 1.18   | down | 1.49     | up   | SATB1         |
| 8058091a      | 1.48E-08 | 3.21    | up   | 4.70     | up   | 6.85   | up   | 2.37     | up   | SATB2         |
| 7994345a      | 3.33E-05 | 1.11    | up   | 1.03     | up   | 1.26   | up   | 1.00     | down | SBK1          |
| 7967420a      | 4.37E-06 | 1.07    | up   | 1.23     | up   | 1.10   | up   | 1.29     | down | SBNO1         |
| 8098195a      | 2.71E-05 | 1.19    | down | 1.79     | down | 1.15   | up   | 1.11     | down | SC4MOL        |
| 8106479a      | 2.76E-08 | 1.23    | down | 1.31     | down | 1.06   | down | 1.94     | up   | SCAMP1        |
| 7990417a      | 7.67E-06 | 1.07    | up   | 1.07     | down | 1.11   | up   | 1.29     | down | SCAMP2        |

| Transcript ID | Arsenic  |          |      | Chromium |      | Nickel   |      | Vanadium |      | Gene Symbol   |
|---------------|----------|----------|------|----------|------|----------|------|----------|------|---------------|
|               | p-value  | $\Delta$ | Reg  | $\Delta$ | Reg  | $\Delta$ | Reg  | $\Delta$ | Reg  |               |
| 7984932a      | 7.15E-06 | 1.28     | up   | 1.36     | up   | 1.45     | up   | 1.24     | down | SCAMP5        |
| 7990582a      | 8.62E-05 | 1.14     | down | 1.63     | down | 1.03     | down | 1.28     | down | SCAPER        |
| 7967544a      | 7.85E-08 | 1.06     | up   | 2.05     | up   | 1.49     | up   | 1.31     | down | SCARB1        |
| 8101158a      | 5.20E-05 | 1.01     | up   | 1.31     | down | 1.01     | up   | 1.14     | up   | SCARB2        |
| 8093576a      | 2.88E-05 | 1.11     | down | 1.58     | down | 1.34     | down | 1.24     | up   | SCARNA22      |
| 7929816a      | 6.03E-06 | 1.23     | up   | 2.14     | up   | 1.65     | up   | 1.19     | down | SCD           |
| 8101366a      | 4.01E-05 | 1.00     | up   | 1.34     | down | 1.07     | down | 1.69     | up   | SCD5          |
| 8100347a      | 2.71E-05 | 1.05     | down | 1.51     | down | 1.38     | down | 1.28     | up   | SCFD2         |
| 7940626a      | 7.84E-07 | 1.22     | down | 1.00     | down | 1.15     | down | 1.04     | up   | SCGB2A1       |
| 7940636a      | 5.20E-05 | 1.06     | up   | 1.19     | down | 1.02     | up   | 1.09     | up   | SCGB2A2       |
| 8049582a      | 7.93E-05 | 1.12     | up   | 1.17     | up   | 1.32     | up   | 1.17     | down | SCLY;UBE2F    |
| 8166278a      | 4.87E-06 | 1.20     | down | 1.38     | up   | 1.41     | down | 1.71     | down | SCML1         |
| 8171561a      | 3.91E-07 | 1.02     | down | 1.67     | up   | 1.35     | down | 1.66     | down | SCML2         |
| 8012823a      | 3.56E-07 | 1.20     | up   | 1.36     | up   | 1.05     | down | 1.24     | down | SCO1          |
| 7901513a      | 1.66E-07 | 1.08     | up   | 1.45     | up   | 1.11     | down | 1.28     | down | SCP2          |
| 7941274a      | 3.77E-05 | 1.19     | up   | 1.38     | up   | 1.01     | down | 1.16     | down | SCYL1;LTBP3   |
| 8147461a      | 3.14E-05 | 3.37     | up   | 1.27     | down | 5.05     | up   | 1.75     | down | SDC2          |
| 7914282a      | 7.23E-06 | 1.21     | up   | 1.41     | down | 1.02     | up   | 1.27     | up   | SDC3          |
| 8066513a      | 4.00E-05 | 1.14     | down | 1.10     | down | 1.15     | down | 1.27     | up   | SDC4          |
| 8064418a      | 6.12E-05 | 1.13     | down | 1.25     | up   | 1.07     | down | 1.02     | down | SDCBP2        |
| 8105612a      | 3.74E-06 | 1.46     | down | 1.30     | down | 1.08     | down | 1.23     | up   | SDCCAG10      |
| 8165156a      | 4.27E-06 | 1.15     | up   | 1.42     | up   | 1.11     | up   | 1.39     | down | SDCCAG3       |
| 7899016a      | 2.18E-05 | 1.05     | down | 1.41     | up   | 1.13     | down | 1.37     | down | SDHD          |
| 8003060a      | 3.05E-07 | 2.65     | down | 1.11     | down | 5.42     | down | 2.61     | down | SDR42E1       |
| 8010139a      | 9.69E-05 | 1.13     | up   | 1.11     | down | 1.29     | up   | 1.17     | up   | SEC14L1       |
| 8072328a      | 1.09E-05 | 1.03     | up   | 1.65     | down | 1.25     | up   | 1.17     | up   | SEC14L2;MTP18 |
| 8061186a      | 5.30E-08 | 1.69     | down | 1.08     | up   | 1.84     | down | 1.02     | up   | SEC23B        |
| 8083826a      | 1.17E-07 | 1.12     | up   | 1.32     | up   | 1.11     | up   | 1.71     | down | SEC62         |
| 8020254a      | 1.21E-06 | 1.04     | up   | 1.47     | up   | 1.02     | down | 1.54     | down | SEH1L         |
| 8040655a      | 2.43E-05 | 1.15     | up   | 1.38     | up   | 1.03     | down | 1.15     | down | SELI;GPR113   |
| 8075462a      | 2.00E-07 | 1.18     | up   | 1.57     | up   | 1.01     | down | 1.53     | down | SELM          |
| 8140668a      | 1.76E-07 | 1.26     | up   | 6.51     | down | 2.02     | up   | 9.04     | up   | SEMA3A        |
| 8079966a      | 1.95E-06 | 1.32     | down | 1.15     | up   | 1.37     | down | 1.69     | up   | SEMA3B        |
| 8140534a      | 3.40E-07 | 1.11     | down | 1.88     | down | 1.30     | down | 1.59     | up   | SEMA3C        |
| 8079896a      | 8.91E-09 | 1.31     | down | 1.51     | down | 1.36     | down | 1.56     | up   | SEMA3F        |
| 8162236a      | 2.77E-09 | 1.57     | up   | 2.89     | up   | 2.05     | up   | 3.60     | down | SEMA4D        |
| 8032839a      | 3.70E-05 | 1.21     | up   | 1.15     | up   | 1.81     | up   | 1.12     | up   | SEMA6B        |
| 7983527a      | 8.66E-06 | 1.74     | up   | 1.23     | down | 1.96     | up   | 1.24     | down | SEMA6D        |
| 7990345a      | 2.39E-08 | 1.68     | down | 1.87     | down | 3.12     | down | 2.19     | up   | SEMA7A        |
| 8004485a      | 9.16E-05 | 1.15     | up   | 1.14     | up   | 1.04     | up   | 1.24     | down | SENP3         |
| 8000890a      | 1.39E-07 | 1.37     | up   | 1.21     | up   | 1.10     | up   | 1.01     | down | SEPHS2        |
| 8099696a      | 2.08E-06 | 1.33     | up   | 1.45     | down | 1.12     | up   | 1.04     | down | SEPSECS       |
| 8054467a      | 7.04E-05 | 1.04     | up   | 1.33     | down | 1.01     | down | 1.18     | up   | SEPT10        |
| 8095854a      | 1.42E-05 | 1.13     | down | 1.17     | down | 1.20     | down | 1.37     | up   | SEPT11        |
| 7917455a      | 2.73E-05 | 1.01     | up   | 1.13     | up   | 1.13     | down | 1.10     | down | SEPT15        |
| 8017039a      | 9.16E-05 | 1.15     | up   | 1.06     | down | 1.46     | up   | 1.13     | up   | SEPT4         |
| 8071234a      | 1.22E-06 | 1.02     | up   | 1.24     | up   | 1.26     | up   | 1.08     | down | SEPT5;GP1BB   |
| 8174692a      | 2.68E-06 | 1.17     | up   | 1.43     | down | 1.14     | up   | 1.14     | down | SEPT6         |
| 8010161a      | 6.51E-05 | 1.12     | up   | 1.09     | down | 1.08     | up   | 1.35     | up   | SEPT9         |
| 7916836a      | 1.81E-06 | 1.12     | down | 1.30     | up   | 1.33     | down | 1.08     | down | SERBP1        |
| 8177658a      | 5.19E-07 | 1.03     | down | 1.62     | down | 1.18     | up   | 1.12     | up   | SERF1A;SERF1B |
| 7983290a      | 8.30E-05 | 1.06     | up   | 1.17     | down | 1.12     | up   | 1.01     | up   | SERF2         |
| 7946933a      | 2.96E-05 | 1.12     | up   | 1.12     | up   | 1.26     | up   | 1.24     | down | SERGEF        |

| Transcript ID | Arsenic  |          |      | Chromium |      | Nickel   |      | Vanadium |      | Gene Symbol        |
|---------------|----------|----------|------|----------|------|----------|------|----------|------|--------------------|
|               | p-value  | $\Delta$ | Reg  | $\Delta$ | Reg  | $\Delta$ | Reg  | $\Delta$ | Reg  |                    |
| 7968892a      | 7.11E-06 | 1.80     | down | 1.77     | down | 2.12     | down | 1.34     | down | SERP2              |
| 7981068a      | 4.57E-07 | 1.29     | up   | 2.06     | down | 1.24     | down | 1.09     | up   | SERPINA1           |
| 7976496a      | 1.45E-09 | 1.03     | up   | 3.70     | down | 1.10     | up   | 1.03     | up   | SERPINA3           |
| 8021635a      | 4.50E-06 | 1.18     | down | 1.35     | up   | 3.99     | down | 6.46     | up   | SERPINB2;SERPINB10 |
| 8021623a      | 2.37E-07 | 1.24     | down | 2.35     | down | 2.73     | down | 4.65     | up   | SERPINB7           |
| 8123609a      | 3.05E-07 | 1.58     | up   | 1.65     | down | 1.63     | up   | 1.05     | up   | SERPINB9           |
| 8059376a      | 1.10E-08 | 3.33     | up   | 1.05     | down | 3.72     | up   | 2.00     | up   | SERPINE2           |
| 7942596a      | 4.63E-10 | 1.01     | down | 1.22     | down | 2.56     | down | 1.20     | up   | SERPINH1           |
| 8036908a      | 1.72E-05 | 1.04     | up   | 1.52     | down | 1.01     | down | 1.22     | up   | SERTAD3            |
| 7909503a      | 5.23E-05 | 1.92     | up   | 1.14     | down | 1.01     | up   | 3.14     | down | SERTAD4            |
| 8057394a      | 1.68E-08 | 2.55     | up   | 1.18     | down | 2.04     | up   | 1.07     | up   | SESTD1             |
| 8158372a      | 3.12E-06 | 1.07     | down | 1.21     | up   | 1.02     | up   | 1.21     | down | SET                |
| 7917674a      | 1.61E-05 | 1.11     | down | 1.31     | up   | 1.04     | down | 1.28     | down | SET;LOC646817      |
| 8021047a      | 9.77E-08 | 1.21     | up   | 1.64     | down | 1.17     | up   | 1.96     | up   | SETBP1             |
| 7994985a      | 5.21E-05 | 1.25     | up   | 1.25     | up   | 1.07     | up   | 1.06     | up   | SETD1A             |
| 7969114a      | 6.54E-07 | 1.01     | down | 1.58     | down | 1.22     | down | 1.33     | up   | SETDB2             |
| 8075343a      | 3.27E-06 | 1.04     | up   | 1.32     | up   | 1.06     | down | 1.06     | down | SF3A1;CCDC157      |
| 7915130a      | 8.65E-08 | 1.03     | down | 1.27     | up   | 1.19     | down | 1.00     | up   | SF3A3              |
| 8058024a      | 1.05E-06 | 1.16     | up   | 1.06     | up   | 1.10     | up   | 1.07     | down | SF3B1              |
| 8150428a      | 3.22E-05 | 1.28     | down | 1.58     | up   | 1.62     | up   | 6.53     | up   | SFRP1              |
| 7902269a      | 7.41E-08 | 1.06     | up   | 1.17     | up   | 1.13     | down | 1.19     | down | SFRS11             |
| 8105714a      | 6.64E-06 | 1.32     | down | 1.17     | down | 1.14     | down | 1.21     | up   | SFRS12             |
| 8112337a      | 3.04E-08 | 1.63     | down | 1.21     | down | 1.21     | down | 1.53     | up   | SFRS12IP1          |
| 8069910a      | 6.06E-05 | 1.08     | up   | 1.28     | up   | 1.05     | down | 1.17     | down | SFRS15             |
| 8176342a      | 3.47E-07 | 1.14     | up   | 1.10     | up   | 1.38     | up   | 1.24     | down | SFRS17A;ASMT       |
| 7943288a      | 4.54E-07 | 1.13     | down | 1.34     | up   | 1.29     | down | 1.54     | down | SFRS2B             |
| 7914235a      | 2.70E-07 | 1.13     | up   | 1.32     | up   | 1.08     | up   | 1.16     | down | SFRS4              |
| 8051622a      | 2.23E-05 | 1.13     | up   | 1.12     | down | 1.04     | up   | 1.05     | down | SFRS7              |
| 7929919a      | 7.16E-11 | 1.05     | down | 1.77     | down | 1.15     | down | 1.87     | up   | SFXN3              |
| 8100318a      | 1.67E-05 | 1.02     | up   | 1.50     | down | 1.06     | down | 1.04     | up   | SGCB               |
| 8083471a      | 3.76E-07 | 1.38     | up   | 5.63     | up   | 1.18     | down | 1.28     | down | SGEF               |
| 8129677a      | 4.00E-07 | 1.47     | up   | 1.72     | down | 2.58     | up   | 1.51     | up   | SGK1               |
| 8047288a      | 1.20E-07 | 1.10     | up   | 1.03     | up   | 1.12     | up   | 1.39     | down | SGOL2              |
| 8112409a      | 1.43E-06 | 1.67     | down | 1.09     | down | 1.45     | down | 1.21     | up   | SGTB               |
| 7994445a      | 9.55E-07 | 1.32     | up   | 1.01     | up   | 1.27     | up   | 1.11     | up   | SH2B1              |
| 7913290a      | 6.42E-06 | 1.07     | down | 1.33     | up   | 1.05     | down | 1.05     | down | SH2D5              |
| 8072847a      | 1.45E-06 | 1.51     | up   | 1.06     | up   | 1.49     | up   | 1.06     | up   | SH3BP1;PDXP        |
| 8085556a      | 3.17E-06 | 1.23     | down | 1.23     | down | 1.13     | down | 1.57     | up   | SH3BP5             |
| 8103166a      | 2.32E-08 | 1.14     | down | 1.99     | down | 1.22     | down | 1.62     | up   | SH3D19             |
| 7985507a      | 9.55E-05 | 1.37     | down | 1.10     | down | 1.33     | down | 1.06     | down | SH3GL3             |
| 7902771a      | 8.20E-05 | 1.10     | up   | 1.01     | down | 1.12     | down | 1.13     | up   | SH3GLB1            |
| 8108912a      | 4.11E-06 | 1.19     | up   | 1.23     | down | 1.33     | up   | 3.64     | up   | SH3RF2             |
| 8044295a      | 9.71E-06 | 1.39     | up   | 1.24     | down | 1.34     | up   | 1.08     | down | SH3RF3             |
| 8049969a      | 9.45E-06 | 1.19     | down | 1.31     | down | 1.06     | up   | 1.36     | up   | SH3YL1             |
| 8153652a      | 5.88E-08 | 1.16     | down | 1.42     | down | 1.14     | down | 1.57     | up   | SHARPIN            |
| 8161255a      | 1.38E-08 | 1.19     | up   | 1.35     | down | 1.11     | up   | 1.43     | up   | SHB;CKAP2          |
| 7920600a      | 9.22E-07 | 1.08     | up   | 1.37     | down | 1.01     | up   | 1.30     | up   | SHC1               |
| 8001133a      | 6.00E-08 | 1.08     | up   | 1.31     | down | 1.07     | up   | 1.67     | up   | SHCBP1             |
| 7920506a      | 2.17E-06 | 1.21     | up   | 1.35     | up   | 1.07     | down | 1.85     | down | SHE                |
| 7970676a      | 2.08E-09 | 1.47     | down | 2.68     | down | 1.42     | down | 3.31     | up   | SHISA2             |
| 7930470a      | 1.58E-07 | 1.06     | down | 1.16     | down | 1.20     | down | 1.26     | up   | SHOC2              |
| 8011396a      | 3.31E-05 | 1.08     | up   | 1.26     | up   | 1.04     | up   | 1.20     | down | SHPK               |
| 8114068a      | 2.34E-06 | 1.02     | down | 1.25     | up   | 1.10     | up   | 1.11     | down | SHROOM1            |

| Transcript ID | Arsenic  |          |      | Chromium |      | Nickel   |      | Vanadium |      | Gene Symbol       |
|---------------|----------|----------|------|----------|------|----------|------|----------|------|-------------------|
|               | p-value  | $\Delta$ | Reg  | $\Delta$ | Reg  | $\Delta$ | Reg  | $\Delta$ | Reg  |                   |
| 8095834a      | 6.60E-07 | 1.25     | down | 1.82     | down | 1.11     | down | 1.46     | up   | SHROOM3           |
| 7952408a      | 3.16E-05 | 1.05     | down | 1.08     | down | 1.17     | up   | 1.85     | down | SIAE              |
| 8001306a      | 6.39E-06 | 1.03     | up   | 1.26     | down | 1.05     | up   | 1.35     | up   | SIAH1             |
| 7971419a      | 2.34E-07 | 1.09     | down | 1.22     | up   | 1.02     | down | 1.65     | down | SIAH3             |
| 8160857a      | 8.70E-05 | 1.29     | up   | 1.20     | up   | 1.11     | up   | 1.12     | down | SIGMAR1           |
| 7943760a      | 6.55E-08 | 1.06     | down | 1.37     | up   | 1.15     | down | 1.15     | up   | SIK2              |
| 7918847a      | 1.59E-05 | 1.00     | up   | 1.24     | up   | 1.19     | down | 1.14     | down | SIKE1             |
| 7963970a      | 3.28E-06 | 1.18     | down | 1.05     | up   | 1.14     | down | 1.20     | up   | SILV              |
| 8128459a      | 4.40E-08 | 1.39     | up   | 1.25     | up   | 4.16     | up   | 1.06     | up   | SIM1              |
| 8068496a      | 8.37E-08 | 1.71     | down | 1.99     | up   | 1.18     | down | 1.77     | down | SIM2              |
| 7990487a      | 2.61E-06 | 1.10     | up   | 1.22     | down | 1.20     | up   | 1.28     | down | SIN3A             |
| 8028286a      | 9.88E-05 | 1.10     | down | 1.23     | up   | 1.33     | down | 1.15     | up   | SIPA1L3           |
| 8060418a      | 2.05E-07 | 2.02     | down | 3.25     | down | 2.55     | down | 1.53     | up   | SIRPA             |
| 8116956a      | 8.00E-05 | 1.37     | up   | 1.04     | up   | 1.46     | up   | 1.02     | up   | SIRT5             |
| 8019296a      | 1.79E-06 | 1.23     | up   | 1.25     | up   | 1.21     | up   | 1.15     | down | SIRT7             |
| 7979510a      | 7.14E-06 | 1.16     | up   | 1.66     | up   | 1.01     | down | 1.44     | down | SIX4              |
| 8138689a      | 8.39E-12 | 2.90     | up   | 1.77     | down | 7.64     | up   | 7.47     | down | SKAP2             |
| 8179364a      | 1.76E-07 | 1.43     | up   | 1.23     | up   | 1.53     | up   | 1.11     | up   | SKIV2L            |
| 8105353a      | 7.81E-11 | 1.68     | down | 1.09     | down | 1.32     | down | 1.26     | up   | SKIV2L2           |
| 7969533a      | 1.10E-08 | 1.32     | up   | 2.33     | up   | 1.17     | down | 4.56     | down | SLAIN1            |
| 8094948a      | 1.85E-06 | 1.02     | down | 1.37     | down | 1.08     | down | 1.19     | up   | SLAIN2            |
| 7906613a      | 3.77E-06 | 1.50     | down | 1.00     | up   | 1.62     | down | 1.46     | up   | SLAMF7            |
| 8176109a      | 4.72E-07 | 1.05     | up   | 1.70     | down | 1.07     | down | 1.17     | up   | SLC10A3           |
| 8094960a      | 4.53E-07 | 1.78     | down | 1.29     | down | 1.81     | down | 1.02     | up   | SLC10A4           |
| 8151559a      | 1.46E-05 | 1.15     | up   | 1.28     | up   | 1.25     | down | 1.90     | down | SLC10A5           |
| 8002152a      | 7.18E-05 | 1.04     | down | 1.26     | down | 1.01     | up   | 1.63     | up   | SLC12A4           |
| 7987192a      | 1.56E-05 | 1.05     | up   | 1.65     | down | 1.07     | up   | 1.07     | down | SLC12A6           |
| 8110755a      | 9.04E-07 | 1.11     | up   | 1.61     | up   | 2.39     | up   | 2.16     | down | SLC12A7           |
| 7918622a      | 1.38E-10 | 1.03     | up   | 1.56     | up   | 1.20     | down | 1.43     | down | SLC16A1           |
| 8121515a      | 3.13E-08 | 1.38     | up   | 1.28     | up   | 1.44     | up   | 1.70     | down | SLC16A10          |
| 8004266a      | 1.70E-06 | 1.47     | up   | 1.21     | up   | 1.60     | up   | 1.27     | down | SLC16A13          |
| 8168424a      | 1.40E-06 | 1.60     | up   | 1.19     | down | 1.40     | up   | 2.72     | up   | SLC16A2           |
| 8070912a      | 5.91E-08 | 1.09     | down | 1.90     | up   | 1.06     | down | 1.33     | down | SLC19A1           |
| 8037835a      | 2.15E-06 | 1.09     | down | 1.31     | up   | 1.33     | down | 1.09     | up   | SLC1A5            |
| 8044499a      | 7.88E-07 | 1.24     | up   | 1.21     | down | 1.11     | up   | 1.27     | up   | SLC20A1           |
| 7904226a      | 4.24E-05 | 1.83     | up   | 1.63     | up   | 1.20     | up   | 1.76     | down | SLC22A15          |
| 8123658a      | 2.44E-05 | 1.23     | up   | 1.05     | down | 1.53     | up   | 1.12     | down | SLC22A23          |
| 8064808a      | 6.48E-05 | 1.47     | down | 1.06     | up   | 1.82     | down | 1.10     | up   | SLC23A2           |
| 7966600a      | 9.64E-08 | 1.48     | up   | 1.07     | down | 1.79     | up   | 1.16     | down | SLC24A6           |
| 8011747a      | 3.53E-05 | 1.20     | up   | 1.33     | up   | 1.15     | up   | 1.11     | down | SLC25A11          |
| 8056766a      | 1.30E-05 | 1.25     | up   | 1.47     | down | 1.22     | up   | 1.06     | up   | SLC25A12          |
| 8169904a      | 6.45E-05 | 1.12     | up   | 1.46     | down | 1.02     | up   | 1.18     | down | SLC25A14          |
| 8018352a      | 2.98E-08 | 1.46     | up   | 1.55     | up   | 1.04     | up   | 1.48     | down | SLC25A19          |
| 7935639a      | 1.39E-07 | 1.24     | down | 1.41     | up   | 1.23     | down | 1.39     | down | SLC25A28          |
| 7971388a      | 5.43E-08 | 1.00     | up   | 1.37     | down | 1.62     | down | 1.61     | up   | SLC25A30          |
| 8152255a      | 7.73E-06 | 1.19     | up   | 1.25     | up   | 1.19     | up   | 1.38     | down | SLC25A32;DCAF13   |
| 8145281a      | 2.40E-06 | 1.04     | down | 1.52     | down | 1.04     | down | 1.70     | up   | SLC25A37          |
| 8145291a      | 6.37E-08 | 1.66     | down | 2.32     | down | 1.45     | down | 1.80     | up   | SLC25A37          |
| 8016018a      | 1.09E-08 | 1.01     | up   | 1.48     | up   | 1.29     | up   | 1.48     | down | SLC25A39          |
| 8169624a      | 5.47E-07 | 1.35     | up   | 1.25     | down | 1.16     | up   | 1.28     | down | SLC25A43          |
| 8169640a      | 3.10E-05 | 1.10     | up   | 1.12     | down | 1.02     | up   | 1.12     | down | SLC25A5           |
| 8177003a      | 1.93E-09 | 1.38     | up   | 1.58     | up   | 1.82     | up   | 1.52     | down | SLC25A6;LOC138412 |
| 7983650a      | 5.42E-07 | 1.89     | down | 6.17     | up   | 1.12     | down | 2.98     | down | SLC27A2           |

| Transcript ID | p-value  | Arsenic  |      | Chromium |      | Nickel   |      | Vanadium |      | Gene Symbol           |
|---------------|----------|----------|------|----------|------|----------|------|----------|------|-----------------------|
|               |          | $\Delta$ | Reg  | $\Delta$ | Reg  | $\Delta$ | Reg  | $\Delta$ | Reg  |                       |
| 8162059a      | 4.94E-05 | 1.09     | up   | 1.32     | up   | 1.03     | down | 1.32     | down | SLC28A3               |
| 8119974a      | 2.30E-05 | 1.01     | down | 1.40     | up   | 1.13     | up   | 1.13     | down | SLC29A1               |
| 7928208a      | 5.30E-08 | 1.21     | up   | 1.12     | up   | 1.30     | up   | 1.46     | down | SLC29A3               |
| 8131326a      | 7.84E-07 | 1.48     | up   | 1.28     | up   | 1.91     | up   | 1.18     | down | SLC29A4               |
| 8064175a      | 7.42E-06 | 1.03     | up   | 1.08     | down | 1.19     | up   | 1.37     | up   | SLC2A4RG;ZBTB46       |
| 8158009a      | 4.85E-05 | 1.01     | down | 1.17     | up   | 1.17     | up   | 1.39     | down | SLC2A8                |
| 7988426a      | 2.57E-06 | 1.25     | up   | 1.71     | down | 1.02     | down | 1.25     | up   | SLC30A4               |
| 8094848a      | 2.85E-05 | 1.15     | down | 1.37     | down | 1.31     | down | 1.13     | up   | SLC30A9               |
| 8157270a      | 1.58E-05 | 1.01     | down | 1.39     | up   | 1.03     | down | 1.46     | down | SLC31A1               |
| 7951485a      | 2.45E-05 | 1.11     | down | 1.53     | up   | 1.43     | down | 1.01     | down | SLC35F2               |
| 7910618a      | 7.24E-05 | 1.54     | down | 1.37     | down | 1.38     | down | 1.45     | up   | SLC35F3               |
| 8054771a      | 5.13E-07 | 1.23     | up   | 1.07     | down | 1.29     | up   | 1.06     | up   | SLC35F5               |
| 8109350a      | 4.78E-05 | 1.31     | down | 1.30     | down | 1.17     | down | 1.11     | up   | SLC36A1               |
| 7950990a      | 1.36E-07 | 1.04     | down | 1.81     | up   | 1.30     | down | 1.33     | down | SLC36A4               |
| 8068810a      | 3.83E-06 | 1.04     | up   | 1.18     | up   | 1.77     | up   | 1.66     | down | SLC37A1               |
| 8143367a      | 9.96E-06 | 1.29     | down | 1.38     | down | 1.88     | down | 1.12     | up   | SLC37A3               |
| 7962516a      | 5.30E-05 | 1.16     | down | 1.16     | up   | 1.06     | up   | 1.07     | down | SLC38A1               |
| 8019149a      | 6.10E-08 | 1.33     | up   | 1.03     | down | 1.38     | up   | 1.12     | down | SLC38A10              |
| 7962537a      | 1.13E-06 | 1.03     | down | 1.16     | down | 1.06     | up   | 1.17     | up   | SLC38A2               |
| 7962559a      | 2.46E-06 | 1.78     | up   | 1.69     | down | 1.53     | up   | 3.35     | up   | SLC38A4               |
| 8172425a      | 4.87E-07 | 5.45     | down | 1.59     | down | 8.04     | down | 1.33     | down | SLC38A5               |
| 8112121a      | 4.67E-11 | 2.00     | down | 1.25     | down | 1.35     | down | 1.51     | up   | SLC38A9               |
| 7920401a      | 9.63E-05 | 1.00     | down | 1.23     | down | 1.25     | down | 1.02     | down | SLC39A1               |
| 8018082a      | 2.52E-05 | 1.52     | up   | 1.05     | down | 1.17     | up   | 1.14     | up   | SLC39A11              |
| 8179525a      | 6.03E-06 | 1.29     | up   | 1.04     | up   | 1.23     | up   | 1.12     | up   | SLC39A7               |
| 7940717a      | 3.06E-05 | 1.24     | down | 1.02     | up   | 1.20     | down | 1.24     | up   | SLC3A2                |
| 8057677a      | 2.64E-08 | 2.48     | up   | 1.29     | up   | 2.36     | up   | 2.12     | down | SLC40A1               |
| 7965964a      | 1.13E-05 | 1.19     | down | 2.06     | down | 1.32     | down | 1.15     | up   | SLC41A2               |
| 7948249a      | 5.40E-06 | 1.29     | down | 1.34     | up   | 1.02     | down | 1.62     | down | SLC43A1               |
| 7948229a      | 8.14E-06 | 1.39     | down | 1.26     | up   | 1.72     | down | 1.04     | up   | SLC43A3               |
| 8013616a      | 1.97E-05 | 1.64     | up   | 1.67     | up   | 1.22     | up   | 1.40     | down | SLC46A1;SARM1;TMEM199 |
| 7970793a      | 8.48E-08 | 1.32     | up   | 2.41     | down | 2.07     | up   | 1.30     | down | SLC46A3               |
| 8005603a      | 1.05E-09 | 1.66     | up   | 1.02     | up   | 3.16     | up   | 4.18     | down | SLC47A1               |
| 8064613a      | 4.43E-06 | 2.24     | down | 1.19     | down | 2.25     | down | 1.02     | down | SLC4A11               |
| 8041015a      | 1.17E-05 | 1.28     | up   | 1.00     | up   | 1.16     | up   | 1.04     | down | SLC4A1AP              |
| 8095585a      | 2.34E-11 | 1.81     | down | 1.24     | down | 6.48     | down | 4.18     | up   | SLC4A4                |
| 8001048a      | 8.11E-06 | 1.47     | up   | 1.02     | down | 1.30     | up   | 1.20     | up   | SLC5A2;C16orf58       |
| 8051030a      | 2.48E-05 | 1.34     | up   | 1.39     | up   | 1.38     | up   | 1.23     | down | SLC5A6                |
| 7965206a      | 4.27E-05 | 1.19     | up   | 2.55     | up   | 1.00     | up   | 1.03     | up   | SLC6A15               |
| 8078014a      | 2.74E-05 | 1.23     | up   | 1.18     | down | 1.66     | up   | 1.06     | down | SLC6A6                |
| 8001082a      | 2.09E-06 | 1.30     | down | 1.17     | down | 1.42     | down | 2.21     | up   | SLC6A8;SLC6A10P       |
| 8003298a      | 1.06E-05 | 1.33     | down | 1.11     | down | 1.30     | down | 1.43     | up   | SLC7A5                |
| 8051762a      | 4.40E-10 | 1.51     | up   | 2.94     | down | 1.42     | down | 3.55     | up   | SLC8A1                |
| 8009685a      | 1.02E-05 | 1.24     | up   | 1.30     | up   | 1.15     | up   | 1.21     | down | SLC9A3R1              |
| 7996498a      | 8.72E-06 | 1.04     | down | 1.04     | up   | 1.24     | down | 1.49     | up   | SLC9A5                |
| 8170097a      | 4.43E-06 | 1.01     | up   | 1.41     | down | 1.03     | down | 1.07     | up   | SLC9A6                |
| 7986214a      | 1.47E-05 | 1.66     | down | 1.47     | down | 1.02     | down | 1.18     | up   | SLCO3A1               |
| 8063923a      | 1.36E-08 | 1.26     | up   | 3.64     | up   | 1.54     | up   | 1.90     | down | SLCO4A1;hCG_2018279   |
| 8107129a      | 6.97E-06 | 1.06     | up   | 1.22     | up   | 1.13     | up   | 1.13     | down | SLCO4C1               |
| 8113369a      | 1.60E-06 | 2.43     | up   | 1.64     | up   | 1.22     | up   | 1.16     | down | SLCO4C1               |
| 8014233a      | 1.54E-08 | 1.08     | up   | 1.65     | up   | 1.02     | down | 1.85     | down | SLFN11                |
| 8014241a      | 3.55E-06 | 1.21     | up   | 1.06     | up   | 1.31     | up   | 1.84     | down | SLFN12                |
| 8014259a      | 2.81E-05 | 1.15     | up   | 1.13     | down | 1.03     | up   | 1.12     | down | SLFN14                |

| Transcript ID | p-value  | Arsenic  |      | Chromium |      | Nickel   |      | Vanadium |      | Gene Symbol          |
|---------------|----------|----------|------|----------|------|----------|------|----------|------|----------------------|
|               |          | $\Delta$ | Reg  | $\Delta$ | Reg  | $\Delta$ | Reg  | $\Delta$ | Reg  |                      |
| 8006531a      | 6.46E-05 | 2.19     | up   | 1.32     | down | 1.24     | up   | 1.14     | up   | SLFN5                |
| 8094301a      | 1.14E-07 | 3.79     | up   | 1.05     | down | 4.44     | up   | 1.24     | down | SLIT2                |
| 8115691a      | 4.38E-09 | 1.32     | up   | 2.62     | down | 1.23     | down | 2.73     | up   | SLIT3                |
| 7930276a      | 7.30E-07 | 1.13     | down | 1.15     | down | 1.26     | down | 1.27     | up   | SLK                  |
| 8020226a      | 9.56E-05 | 1.05     | up   | 1.22     | up   | 1.07     | up   | 1.22     | down | SLMO1                |
| 7989253a      | 2.40E-05 | 1.01     | up   | 1.29     | down | 1.05     | down | 1.44     | down | SLTM                 |
| 8097657a      | 1.07E-05 | 1.02     | up   | 1.40     | down | 1.13     | down | 1.20     | up   | SMAD1                |
| 7984364a      | 2.31E-05 | 1.03     | down | 1.74     | down | 1.06     | up   | 1.09     | down | SMAD3                |
| 7984353a      | 6.74E-05 | 1.10     | down | 1.96     | down | 1.47     | up   | 1.15     | up   | SMAD6                |
| 8023220a      | 6.46E-05 | 1.12     | up   | 1.74     | down | 1.23     | up   | 1.24     | up   | SMAD7                |
| 8120585a      | 2.31E-05 | 1.06     | up   | 1.24     | up   | 1.02     | up   | 1.28     | down | SMAP1;B3GAT2         |
| 7900426a      | 3.50E-07 | 1.11     | up   | 1.11     | up   | 1.25     | down | 1.48     | up   | SMAP2                |
| 8174985a      | 3.78E-06 | 1.31     | up   | 1.43     | down | 1.05     | down | 1.10     | down | SMARCA1              |
| 8154059a      | 4.23E-07 | 1.29     | down | 1.32     | down | 1.54     | down | 1.40     | up   | SMARCA2              |
| 8048175a      | 8.42E-08 | 1.37     | up   | 1.08     | up   | 1.26     | up   | 1.02     | up   | SMARCAL1             |
| 7955331a      | 1.54E-05 | 1.13     | up   | 1.27     | up   | 1.21     | up   | 1.13     | down | SMARCD1              |
| 8015039a      | 6.84E-09 | 1.11     | down | 1.46     | up   | 1.08     | down | 1.73     | down | SMARCE1;KRT222       |
| 8005441a      | 2.81E-05 | 1.25     | up   | 1.18     | up   | 1.14     | up   | 1.22     | down | SMCR8                |
| 7999841a      | 2.09E-05 | 1.37     | up   | 1.03     | up   | 1.19     | up   | 1.03     | down | SMG1                 |
| 8136080a      | 1.99E-08 | 1.06     | up   | 1.79     | up   | 1.47     | up   | 1.55     | down | SMO                  |
| 7938100a      | 6.76E-07 | 1.42     | up   | 1.02     | down | 1.41     | up   | 1.27     | up   | SMPD1                |
| 8055183a      | 4.55E-06 | 1.25     | up   | 1.10     | up   | 1.29     | up   | 1.02     | up   | SMPD4                |
| 8045301a      | 8.38E-07 | 1.20     | up   | 1.30     | up   | 1.28     | up   | 1.02     | down | SMPD4;LOC150776      |
| 8095491a      | 2.54E-06 | 1.00     | down | 1.20     | down | 1.00     | up   | 1.19     | up   | SMR3B;IGHA1          |
| 8166402a      | 6.34E-05 | 1.02     | up   | 1.34     | up   | 1.14     | down | 1.02     | down | SMS                  |
| 7909689a      | 7.55E-07 | 1.30     | down | 1.39     | down | 1.42     | down | 1.29     | up   | SMYD2                |
| 7925589a      | 3.74E-08 | 1.46     | down | 1.13     | up   | 2.00     | down | 1.85     | up   | SMYD3                |
| 8042705a      | 4.34E-09 | 1.48     | up   | 1.47     | up   | 1.39     | up   | 1.31     | down | SMYD5                |
| 8063382a      | 9.87E-10 | 1.34     | up   | 2.29     | down | 1.36     | up   | 1.01     | down | SNAI1                |
| 8060963a      | 4.54E-06 | 1.00     | down | 1.12     | up   | 1.07     | up   | 1.87     | up   | SNAP25               |
| 7989924a      | 1.57E-05 | 1.34     | up   | 1.13     | down | 1.32     | up   | 1.31     | down | SNAPC5               |
| 8016508a      | 5.37E-06 | 1.13     | up   | 1.10     | down | 1.21     | up   | 1.12     | down | SNF8                 |
| 7951032a      | 2.07E-06 | 1.19     | down | 1.57     | up   | 1.38     | down | 1.24     | down | SNORA1               |
| 7971386a      | 1.50E-05 | 1.01     | down | 1.20     | down | 1.35     | down | 1.00     | down | SNORA31              |
| 8118207a      | 2.61E-05 | 1.33     | up   | 1.07     | up   | 1.39     | up   | 1.08     | down | SNORA38              |
| 7951038a      | 8.65E-07 | 1.28     | down | 1.37     | up   | 1.54     | down | 1.23     | down | SNORA40;TAF1D        |
| 8170992a      | 7.85E-08 | 1.42     | down | 2.16     | down | 1.90     | down | 1.09     | up   | SNORA56              |
| 8170863a      | 4.60E-09 | 1.29     | down | 2.29     | down | 1.73     | down | 1.47     | up   | SNORA70;RPL10        |
| 7951034a      | 3.93E-06 | 1.20     | down | 1.39     | up   | 1.41     | down | 1.09     | down | SNORA8;TAF1D         |
| 7982098a      | 2.90E-05 | 2.50     | down | 1.48     | down | 1.54     | down | 2.33     | up   | SNORD109A;SNORD109B  |
| 7981949a      | 7.80E-06 | 2.16     | down | 3.09     | down | 1.03     | down | 3.45     | up   | SNORD116-1           |
| 7981970a      | 2.61E-06 | 2.06     | down | 1.18     | down | 1.56     | down | 2.26     | up   | SNORD116-11          |
| 7981972a      | 4.08E-06 | 1.38     | down | 1.24     | down | 1.31     | down | 1.33     | up   | SNORD116-12          |
| 7981974a      | 4.77E-07 | 2.14     | down | 1.30     | down | 1.61     | down | 2.05     | up   | SNORD116-13          |
| 7981976a      | 2.13E-07 | 1.78     | down | 21.47    | down | 1.14     | up   | 3.64     | up   | SNORD116-14          |
| 7981978a      | 3.25E-07 | 1.75     | down | 16.17    | down | 1.12     | up   | 3.25     | up   | SNORD116-15          |
| 7981986a      | 8.33E-08 | 1.67     | down | 20.31    | down | 1.15     | up   | 3.17     | up   | SNORD116-15-19/21-22 |
| 7981988a      | 5.31E-07 | 1.94     | down | 11.53    | down | 1.05     | up   | 3.72     | up   | SNORD116-20;SNORD116 |
| 7981990a      | 1.14E-07 | 2.34     | down | 12.47    | down | 1.03     | down | 3.25     | up   | SNORD116-21;SNORD116 |
| 7981992a      | 3.29E-06 | 1.75     | down | 1.43     | down | 1.39     | down | 1.82     | up   | SNORD116-22          |
| 7981994a      | 2.79E-06 | 1.93     | down | 1.53     | down | 1.09     | down | 2.47     | up   | SNORD116-23          |
| 7981996a      | 3.73E-06 | 2.30     | down | 4.81     | down | 1.01     | down | 3.81     | up   | SNORD116-24          |
| 7982006a      | 4.62E-06 | 1.65     | down | 1.32     | down | 1.24     | down | 1.76     | up   | SNORD116-29          |



| Transcript ID | p-value  | Arsenic  |      | Chromium |      | Nickel   |      | Vanadium |      | Gene Symbol      |
|---------------|----------|----------|------|----------|------|----------|------|----------|------|------------------|
|               |          | $\Delta$ | Reg  | $\Delta$ | Reg  | $\Delta$ | Reg  | $\Delta$ | Reg  |                  |
| 7981966a      | 6.03E-06 | 2.10     | down | 5.82     | down | 1.04     | up   | 3.23     | up   | SNORD116-3/5/7-9 |
| 7981955a      | 1.73E-05 | 2.17     | down | 2.24     | down | 1.26     | down | 1.99     | up   | SNORD116-4;SNRPN |
| 7981962a      | 6.66E-05 | 2.35     | down | 3.20     | down | 1.03     | up   | 3.03     | up   | SNORD116-3/5/7/9 |
| 7981960a      | 5.57E-05 | 2.34     | down | 1.68     | down | 1.22     | down | 2.37     | up   | SNORD116-6       |
| 7981964a      | 3.39E-07 | 2.59     | down | 4.44     | down | 1.22     | down | 2.97     | up   | SNORD116-3/8/9   |
| 8145793a      | 3.81E-06 | 1.19     | up   | 1.50     | down | 1.09     | up   | 3.40     | up   | SNORD13          |
| 8086752a      | 2.37E-05 | 1.11     | up   | 1.29     | down | 1.15     | up   | 3.42     | up   | SNORD13;RNU13P3  |
| 8010078a      | 6.54E-05 | 1.21     | down | 1.18     | up   | 1.67     | down | 1.10     | up   | SNORD1C          |
| 8159004a      | 2.41E-05 | 1.49     | down | 1.45     | up   | 1.24     | down | 1.57     | down | SNORD24;RPL7A    |
| 7901050a      | 8.24E-05 | 1.01     | down | 1.20     | up   | 1.19     | down | 1.09     | down | SNORD38A         |
| 7902398a      | 8.35E-05 | 1.29     | down | 1.10     | up   | 1.38     | down | 1.10     | up   | SNORD45A;RABGGTB |
| 7902400a      | 2.82E-06 | 1.36     | down | 1.00     | down | 1.61     | down | 1.04     | up   | SNORD45B;RABGGTB |
| 7902396a      | 4.61E-06 | 1.18     | down | 1.11     | up   | 1.59     | down | 1.04     | up   | SNORD45C         |
| 8005957a      | 2.91E-05 | 1.24     | up   | 1.38     | up   | 1.06     | up   | 1.64     | down | SNORD4B          |
| 7951036a      | 1.32E-07 | 1.28     | down | 1.48     | up   | 1.45     | down | 1.11     | down | SNORD5;TAF1D     |
| 7951030a      | 4.76E-09 | 1.28     | down | 1.52     | up   | 1.45     | down | 1.40     | down | SNORD6           |
| 7959586a      | 4.86E-05 | 1.02     | down | 1.22     | down | 1.19     | up   | 1.05     | down | SNRNP35          |
| 7914334a      | 4.28E-06 | 1.06     | up   | 1.31     | up   | 1.05     | down | 1.16     | down | SNRNP40          |
| 8064502a      | 3.22E-07 | 1.45     | down | 1.11     | up   | 1.50     | down | 1.15     | down | SNRPB            |
| 8061075a      | 4.34E-07 | 1.75     | down | 1.06     | up   | 1.89     | down | 1.06     | down | SNRPB2           |
| 8118826a      | 9.94E-06 | 1.29     | up   | 1.08     | up   | 1.41     | up   | 1.07     | down | SNRPC            |
| 7981945a      | 3.99E-06 | 2.23     | down | 1.27     | down | 1.44     | down | 1.44     | up   | SNRPN            |
| 7981919a      | 1.03E-07 | 1.52     | down | 4.41     | down | 1.04     | down | 2.47     | up   | SNRPN;SNURF      |
| 8152606a      | 9.80E-07 | 1.65     | up   | 1.49     | down | 1.19     | up   | 1.17     | down | SNTB1            |
| 7990528a      | 9.97E-10 | 1.06     | up   | 2.95     | down | 1.02     | up   | 1.01     | up   | SNUPN            |
| 7980463a      | 5.67E-05 | 1.28     | up   | 1.09     | up   | 1.07     | up   | 1.06     | down | SNW1             |
| 8131957a      | 1.27E-06 | 1.22     | up   | 1.96     | up   | 3.92     | up   | 2.65     | down | SNX10            |
| 8008096a      | 8.78E-05 | 1.23     | up   | 1.13     | up   | 1.21     | up   | 1.05     | down | SNX11            |
| 8173430a      | 4.62E-05 | 1.12     | up   | 1.25     | down | 1.01     | up   | 1.14     | down | SNX12            |
| 8105328a      | 1.72E-08 | 1.29     | down | 1.02     | up   | 1.25     | down | 1.34     | up   | SNX18            |
| 7985016a      | 1.51E-05 | 1.05     | up   | 1.67     | down | 1.03     | up   | 1.08     | up   | SNX33            |
| 8065165a      | 2.99E-07 | 1.64     | down | 1.17     | up   | 1.90     | down | 1.10     | down | SNX5             |
| 7903203a      | 2.41E-05 | 1.07     | up   | 1.33     | down | 1.06     | down | 1.33     | up   | SNX7             |
| 8122986a      | 3.63E-05 | 1.11     | up   | 1.23     | down | 1.25     | up   | 1.05     | down | SNX9             |
| 8041820a      | 2.75E-06 | 1.19     | up   | 1.27     | down | 1.20     | up   | 1.30     | up   | SOCS5            |
| 7936249a      | 4.20E-05 | 1.04     | up   | 1.14     | down | 1.07     | up   | 1.09     | down | SORCS1           |
| 8093997a      | 2.27E-07 | 1.04     | up   | 1.10     | up   | 1.12     | up   | 1.29     | down | SORCS2           |
| 7983393a      | 4.06E-07 | 1.41     | up   | 1.60     | up   | 1.39     | up   | 1.77     | down | SORD             |
| 7944667a      | 4.83E-06 | 1.66     | up   | 1.20     | up   | 2.28     | up   | 1.46     | down | SORL1            |
| 7978932a      | 8.85E-07 | 1.12     | up   | 1.71     | down | 1.01     | down | 1.20     | up   | SOS2             |
| 8117165a      | 2.12E-05 | 1.09     | up   | 1.58     | down | 1.29     | up   | 1.17     | up   | SOX4             |
| 8131709a      | 2.29E-06 | 1.23     | up   | 1.19     | up   | 1.27     | up   | 1.27     | down | SP4              |
| 7944869a      | 1.28E-07 | 1.40     | down | 1.38     | up   | 1.06     | up   | 2.63     | down | SPA17;SIAE       |
| 8048081a      | 5.76E-07 | 1.15     | up   | 1.14     | up   | 1.21     | up   | 1.30     | down | SPAG16           |
| 8013671a      | 9.02E-06 | 1.03     | up   | 1.00     | up   | 1.17     | up   | 1.60     | down | SPAG5;FLJ25006   |
| 8175578a      | 3.19E-05 | 1.12     | up   | 1.23     | down | 1.02     | up   | 1.22     | up   | SPANXN2          |
| 8175572a      | 1.54E-07 | 1.32     | down | 1.29     | down | 1.48     | down | 1.87     | up   | SPANXN3          |
| 8115327a      | 4.86E-08 | 1.13     | down | 1.29     | down | 1.07     | down | 1.36     | up   | SPARC            |
| 7984488a      | 1.38E-10 | 1.11     | down | 1.37     | up   | 1.15     | down | 2.52     | down | SPESP1;NOX5      |
| 7988286a      | 1.37E-05 | 1.16     | down | 1.75     | down | 1.03     | down | 1.04     | up   | SPG11;ISLR       |
| 7989696a      | 1.99E-08 | 1.19     | up   | 1.18     | down | 1.20     | up   | 1.17     | down | SPG21            |
| 7997909a      | 1.20E-08 | 1.32     | up   | 1.28     | up   | 1.66     | up   | 1.32     | down | SPG7             |
| 8030078a      | 2.58E-05 | 1.06     | down | 1.28     | up   | 1.12     | down | 1.14     | up   | SPHK2            |

| Transcript ID | Arsenic  |          |      | Chromium |      | Nickel   |      | Vanadium |      | Gene Symbol       |
|---------------|----------|----------|------|----------|------|----------|------|----------|------|-------------------|
|               | p-value  | $\Delta$ | Reg  | $\Delta$ | Reg  | $\Delta$ | Reg  | $\Delta$ | Reg  |                   |
| 8173189a      | 1.02E-06 | 1.26     | up   | 1.35     | down | 1.10     | up   | 1.06     | down | SPIN2B;SPIN2A     |
| 7998015a      | 6.00E-05 | 1.09     | up   | 1.17     | up   | 1.34     | up   | 1.10     | down | SPIRE2            |
| 7994518a      | 1.77E-06 | 1.31     | up   | 1.20     | up   | 1.22     | up   | 1.09     | up   | SPNS1             |
| 7914467a      | 2.30E-05 | 1.08     | up   | 1.48     | down | 1.26     | down | 1.92     | up   | SPOCD1            |
| 8114287a      | 1.55E-05 | 1.40     | up   | 2.26     | down | 3.01     | up   | 3.85     | up   | SPOCK1            |
| 8016562a      | 2.83E-06 | 1.23     | up   | 1.11     | up   | 1.08     | up   | 1.29     | down | SPOP              |
| 8042696a      | 2.20E-08 | 1.52     | up   | 1.48     | up   | 1.31     | up   | 1.29     | down | SPR               |
| 8052689a      | 5.96E-05 | 1.40     | up   | 1.02     | down | 1.00     | down | 1.03     | down | SPRED2            |
| 7998590a      | 5.17E-05 | 1.12     | up   | 1.13     | up   | 1.04     | down | 1.18     | up   | SPSB3             |
| 8041995a      | 3.78E-05 | 1.01     | down | 1.29     | down | 1.05     | down | 1.20     | up   | SPTBN1            |
| 8162294a      | 1.87E-06 | 1.23     | down | 1.24     | up   | 1.14     | down | 1.43     | down | SPTLC1            |
| 8060997a      | 2.64E-12 | 1.39     | down | 7.66     | down | 8.46     | down | 50.35    | up   | SPTLC3            |
| 7947040a      | 1.14E-05 | 1.17     | up   | 1.46     | up   | 1.01     | down | 1.24     | down | SPTY2D1           |
| 8148280a      | 5.41E-05 | 1.03     | down | 1.23     | down | 1.35     | up   | 1.61     | down | SQLE              |
| 7983512a      | 6.00E-08 | 1.76     | up   | 2.74     | down | 1.76     | up   | 1.16     | up   | SQRDL             |
| 8013135a      | 9.71E-05 | 1.02     | up   | 1.50     | up   | 1.08     | up   | 1.08     | down | SREBF1            |
| 7956759a      | 3.92E-05 | 1.43     | up   | 1.25     | down | 1.63     | up   | 1.64     | up   | SRGAP1            |
| 7909175a      | 5.31E-06 | 1.00     | up   | 1.38     | down | 1.24     | down | 1.26     | up   | SRGAP2            |
| 7904469a      | 4.95E-05 | 1.08     | down | 1.07     | down | 1.34     | down | 1.16     | up   | SRGAP2;SRGAP2P1/2 |
| 7952557a      | 1.69E-05 | 1.05     | up   | 1.13     | down | 1.16     | up   | 1.16     | down | SRPR              |
| 8082816a      | 5.66E-05 | 1.03     | up   | 1.42     | up   | 1.00     | up   | 1.08     | down | SRPRB             |
| 8172043a      | 6.73E-06 | 1.08     | down | 1.08     | up   | 1.03     | down | 4.23     | up   | SRPX              |
| 8168749a      | 1.22E-05 | 1.88     | up   | 1.57     | down | 1.03     | down | 4.16     | up   | SRPX2             |
| 8003722a      | 8.24E-09 | 2.23     | up   | 1.03     | up   | 1.52     | up   | 1.01     | up   | SRR;TSR1          |
| 8064375a      | 2.59E-06 | 1.79     | down | 1.20     | up   | 2.01     | down | 1.07     | down | SRXN1             |
| 8022625a      | 7.86E-05 | 1.14     | down | 1.10     | up   | 1.13     | down | 1.26     | down | SS18              |
| 8046201a      | 9.53E-07 | 1.17     | up   | 1.02     | up   | 1.01     | up   | 1.20     | down | SSB               |
| 8112940a      | 2.60E-05 | 1.02     | down | 3.32     | down | 3.08     | down | 1.50     | up   | SSBP2             |
| 8046726a      | 6.95E-08 | 1.45     | up   | 1.01     | up   | 1.55     | up   | 1.03     | down | SSFA2             |
| 8123767a      | 4.44E-07 | 1.27     | up   | 1.13     | up   | 1.27     | up   | 1.03     | up   | SSR1              |
| 8170775a      | 2.03E-07 | 1.06     | down | 1.55     | down | 1.17     | down | 1.27     | up   | SSR4              |
| 7948211a      | 1.11E-05 | 1.23     | down | 1.22     | up   | 1.18     | down | 1.10     | down | SSRP1             |
| 7941296a      | 7.31E-05 | 1.02     | down | 1.39     | up   | 1.22     | down | 1.04     | down | SSSCA1            |
| 7974047a      | 2.40E-08 | 1.12     | down | 2.74     | up   | 1.06     | up   | 1.99     | down | SSTR1             |
| 7990815a      | 1.18E-06 | 1.31     | up   | 1.35     | down | 1.27     | up   | 1.36     | down | ST20;C15orf37     |
| 8002370a      | 2.83E-07 | 1.26     | up   | 1.44     | down | 1.37     | up   | 1.33     | up   | ST3GAL2           |
| 7945110a      | 1.08E-07 | 1.36     | up   | 1.38     | down | 1.60     | up   | 1.10     | down | ST3GAL4           |
| 8081219a      | 1.54E-08 | 2.18     | up   | 1.26     | up   | 2.64     | up   | 1.19     | down | ST3GAL6           |
| 7932407a      | 6.69E-06 | 1.36     | up   | 1.09     | down | 1.90     | up   | 1.06     | up   | ST8SIA6           |
| 8078529a      | 6.92E-07 | 1.48     | down | 1.11     | down | 3.50     | down | 1.05     | down | STAC              |
| 8042772a      | 3.71E-05 | 1.18     | up   | 1.03     | up   | 1.10     | up   | 1.50     | up   | STAMBP            |
| 7929012a      | 1.33E-05 | 1.13     | down | 1.26     | down | 2.31     | down | 1.16     | up   | STAMBPL1          |
| 7950235a      | 3.65E-05 | 1.36     | up   | 1.22     | down | 1.36     | up   | 1.24     | up   | STARD10           |
| 7970924a      | 2.69E-07 | 1.09     | down | 1.71     | down | 1.27     | down | 1.36     | up   | STARD13           |
| 8006877a      | 1.21E-06 | 1.16     | up   | 1.22     | up   | 1.12     | up   | 1.64     | down | STARD3            |
| 8132376a      | 2.46E-05 | 1.20     | up   | 1.16     | down | 1.05     | down | 1.31     | up   | STARD3NL          |
| 8053890a      | 1.47E-07 | 1.24     | up   | 1.17     | up   | 1.10     | up   | 1.04     | down | STARD7            |
| 7983143a      | 5.83E-05 | 1.03     | up   | 1.64     | down | 1.15     | up   | 1.21     | down | STARD9            |
| 8057744a      | 3.69E-08 | 1.25     | up   | 1.27     | up   | 1.29     | up   | 1.26     | down | STAT1             |
| 8015607a      | 1.35E-07 | 1.05     | down | 1.27     | up   | 1.04     | up   | 1.74     | down | STAT3             |
| 8015590a      | 3.04E-06 | 1.01     | down | 1.21     | up   | 1.00     | down | 1.97     | down | STAT5B            |
| 8149825a      | 5.84E-05 | 1.28     | up   | 1.80     | down | 1.72     | up   | 5.20     | up   | STC1              |
| 8115851a      | 6.45E-07 | 1.18     | down | 1.28     | down | 1.27     | down | 2.44     | up   | STC2              |

| Transcript ID | p-value  | Arsenic |      | Chromium |      | Nickel |      | Vanadium |      | Gene Symbol           |
|---------------|----------|---------|------|----------|------|--------|------|----------|------|-----------------------|
|               |          | Δ       | Reg  | Δ        | Reg  | Δ      | Reg  | Δ        | Reg  |                       |
| 8044793a      | 5.92E-05 | 1.37    | up   | 1.26     | up   | 1.53   | up   | 1.54     | up   | STEAP3                |
| 8094501a      | 3.12E-06 | 1.16    | up   | 1.45     | down | 1.24   | down | 1.03     | up   | STIM2                 |
| 7940857a      | 2.85E-05 | 1.03    | down | 1.20     | up   | 1.13   | down | 1.13     | down | STIP1                 |
| 8048505a      | 7.34E-09 | 1.46    | up   | 1.00     | up   | 1.55   | up   | 1.04     | up   | STK16                 |
| 8132503a      | 1.60E-06 | 1.08    | down | 1.02     | down | 1.20   | down | 1.62     | up   | STK17A                |
| 8057887a      | 6.02E-05 | 1.23    | up   | 1.13     | down | 1.01   | down | 1.18     | up   | STK17B                |
| 8178164a      | 4.57E-06 | 1.53    | up   | 1.33     | down | 1.27   | up   | 1.10     | up   | STK19;LOC100294221    |
| 8179391a      | 8.45E-07 | 1.34    | up   | 1.15     | down | 1.34   | up   | 1.04     | up   | STK19;LOC100294221    |
| 8060257a      | 3.11E-06 | 1.32    | up   | 1.05     | up   | 1.46   | up   | 1.05     | up   | STK25                 |
| 7937089a      | 1.44E-07 | 1.18    | up   | 1.29     | down | 1.46   | up   | 1.47     | up   | STK32C                |
| 7946365a      | 1.05E-05 | 1.65    | down | 1.37     | down | 2.57   | down | 1.82     | down | STK33                 |
| 8060427a      | 2.60E-05 | 1.71    | down | 1.20     | up   | 1.72   | down | 1.15     | down | STK35                 |
| 8048381a      | 4.31E-05 | 1.09    | up   | 1.08     | down | 1.33   | up   | 1.15     | down | STK36                 |
| 7954511a      | 4.00E-05 | 1.43    | up   | 1.13     | down | 1.57   | up   | 1.23     | down | STK38L                |
| 7914904a      | 9.44E-06 | 1.05    | up   | 1.55     | up   | 1.04   | down | 1.00     | down | STK40                 |
| 8157605a      | 9.20E-05 | 1.37    | down | 1.37     | up   | 1.03   | up   | 1.23     | down | STOM                  |
| 7927915a      | 3.75E-07 | 1.20    | up   | 1.06     | down | 1.73   | up   | 1.94     | down | STOX1                 |
| 8098549a      | 3.92E-07 | 1.39    | up   | 1.08     | up   | 1.67   | up   | 1.61     | down | STOX2                 |
| 8164013a      | 1.03E-08 | 1.45    | down | 1.42     | up   | 1.05   | up   | 2.82     | down | STRBP                 |
| 8037816a      | 6.01E-05 | 1.13    | down | 1.02     | down | 1.23   | down | 1.06     | up   | STRN4                 |
| 8165866a      | 3.48E-06 | 1.16    | up   | 1.18     | up   | 1.53   | down | 1.13     | down | STS                   |
| 8078360a      | 4.52E-05 | 1.29    | down | 1.13     | down | 1.49   | down | 1.00     | up   | STT3B                 |
| 7992021a      | 2.81E-05 | 1.07    | up   | 1.24     | down | 1.18   | down | 1.42     | up   | STUB1;JMJD8           |
| 8122457a      | 2.57E-05 | 1.06    | up   | 1.92     | down | 1.19   | up   | 1.09     | down | STX11                 |
| 7899361a      | 7.57E-07 | 1.13    | down | 1.50     | down | 1.25   | down | 1.23     | up   | STX12                 |
| 8000963a      | 2.00E-06 | 1.13    | down | 1.11     | down | 1.28   | down | 1.60     | up   | STX1B                 |
| 8025255a      | 7.03E-09 | 1.46    | up   | 1.13     | up   | 1.60   | up   | 1.44     | down | STXBP2                |
| 7903541a      | 7.28E-05 | 1.11    | up   | 1.16     | up   | 1.07   | down | 1.26     | down | STXBP3                |
| 8122600a      | 9.53E-07 | 1.06    | up   | 1.85     | down | 1.00   | up   | 1.27     | up   | STXBP5                |
| 7978376a      | 3.70E-07 | 1.18    | down | 4.80     | up   | 2.33   | down | 1.58     | down | STXBP6                |
| 7971541a      | 3.38E-05 | 1.07    | up   | 1.30     | down | 1.18   | down | 1.22     | up   | SUCLA2                |
| 8088664a      | 4.13E-06 | 1.31    | down | 1.43     | down | 1.41   | down | 1.36     | up   | SUCLG2                |
| 7969271a      | 1.33E-05 | 1.00    | down | 1.22     | down | 1.37   | down | 1.29     | up   | SUGT1                 |
| 8146863a      | 4.26E-07 | 2.48    | up   | 1.00     | up   | 5.65   | up   | 3.21     | down | SULF1                 |
| 7994781a      | 9.17E-07 | 1.49    | up   | 1.09     | up   | 1.35   | up   | 1.01     | up   | SULT1A1-4;GIYD1;GIYD2 |
| 8070811a      | 1.74E-05 | 1.18    | up   | 1.29     | up   | 1.15   | up   | 1.13     | down | SUMO3                 |
| 8028674a      | 3.00E-05 | 1.05    | down | 1.26     | up   | 1.19   | down | 1.03     | up   | SUPT5H                |
| 8051204a      | 8.84E-06 | 1.31    | up   | 1.03     | down | 1.16   | up   | 1.08     | down | SUPT7L                |
| 8159008a      | 4.11E-05 | 1.07    | down | 1.42     | up   | 1.09   | up   | 1.18     | down | SURF2                 |
| 8164883a      | 2.84E-05 | 1.08    | down | 1.25     | up   | 1.00   | down | 1.17     | down | SURF4                 |
| 8164862a      | 1.68E-06 | 1.10    | down | 1.44     | up   | 1.18   | down | 1.27     | down | SURF6                 |
| 8156393a      | 3.98E-07 | 1.18    | up   | 1.07     | down | 1.03   | down | 2.28     | down | SUSD3                 |
| 8086051a      | 1.50E-06 | 1.22    | down | 1.96     | down | 1.23   | down | 1.63     | up   | SUSD5                 |
| 8167347a      | 4.67E-08 | 1.32    | up   | 1.15     | down | 1.18   | up   | 1.32     | down | SUV39H1               |
| 8006325a      | 5.88E-05 | 1.03    | down | 1.17     | up   | 1.04   | down | 1.38     | down | SUZ12                 |
| 8006183a      | 1.55E-05 | 1.05    | up   | 1.27     | up   | 1.07   | up   | 1.38     | down | SUZ12P                |
| 7919645a      | 1.96E-05 | 1.02    | down | 1.85     | down | 1.21   | down | 1.47     | up   | SV2A                  |
| 8106336a      | 7.28E-05 | 1.13    | up   | 1.20     | up   | 1.03   | up   | 1.08     | up   | SV2C                  |
| 8163202a      | 7.20E-07 | 1.26    | up   | 1.90     | down | 1.02   | up   | 1.08     | up   | SVEP1                 |
| 7932796a      | 5.48E-06 | 1.04    | down | 2.52     | down | 1.20   | down | 1.65     | up   | SVIL                  |
| 7947147a      | 8.10E-09 | 1.30    | up   | 2.59     | up   | 1.04   | up   | 2.46     | down | SVIP                  |
| 8166219a      | 4.08E-06 | 1.12    | up   | 1.26     | up   | 1.05   | down | 1.15     | down | SYAP1                 |
| 8067305a      | 1.37E-05 | 1.02    | down | 2.01     | down | 1.13   | up   | 1.16     | up   | SYCP2                 |

| Transcript ID | Arsenic  |          |      | Chromium |      | Nickel   |      | Vanadium |      | Gene Symbol       |
|---------------|----------|----------|------|----------|------|----------|------|----------|------|-------------------|
|               | p-value  | $\Delta$ | Reg  | $\Delta$ | Reg  | $\Delta$ | Reg  | $\Delta$ | Reg  |                   |
| 7917322a      | 2.84E-09 | 1.44     | up   | 1.49     | up   | 1.37     | up   | 2.36     | down | SYDE2             |
| 7913814a      | 4.35E-05 | 1.13     | up   | 1.23     | up   | 1.06     | down | 1.16     | down | SYF2              |
| 8037695a      | 2.66E-06 | 1.00     | down | 1.32     | up   | 1.13     | down | 1.02     | down | SYMPK             |
| 7914557a      | 2.75E-09 | 1.02     | up   | 2.06     | down | 1.24     | down | 1.99     | up   | SYNC              |
| 8010243a      | 1.20E-09 | 1.32     | up   | 1.99     | up   | 1.32     | up   | 1.78     | down | SYNGR2            |
| 7986385a      | 4.05E-06 | 1.04     | up   | 1.71     | down | 1.46     | up   | 1.23     | up   | SYNM              |
| 8109305a      | 6.38E-09 | 1.06     | up   | 1.48     | down | 1.29     | up   | 1.18     | up   | SYNPO             |
| 8014551a      | 7.29E-06 | 1.21     | up   | 1.23     | up   | 1.16     | up   | 1.55     | down | SYNRG             |
| 8062964a      | 1.57E-05 | 1.11     | up   | 1.22     | up   | 1.31     | up   | 1.06     | up   | SYS1;SYS1-DBNDD2  |
| 7950810a      | 1.46E-08 | 1.08     | down | 1.05     | down | 1.51     | down | 3.52     | up   | SYTL2             |
| 8123080a      | 4.82E-07 | 1.38     | up   | 1.61     | down | 1.03     | down | 1.85     | up   | SYTL3             |
| 8173955a      | 6.19E-10 | 1.28     | up   | 2.04     | down | 1.23     | up   | 1.21     | up   | SYTL4             |
| 8145954a      | 2.22E-05 | 1.02     | up   | 1.38     | down | 1.04     | down | 1.47     | up   | TACC1             |
| 8009176a      | 5.31E-07 | 1.45     | up   | 1.11     | up   | 1.24     | up   | 1.14     | down | TACO1             |
| 7946221a      | 5.17E-08 | 1.29     | up   | 1.39     | up   | 1.14     | up   | 1.01     | up   | TAF10             |
| 8125859a      | 1.45E-08 | 1.29     | up   | 1.26     | down | 1.39     | up   | 1.22     | up   | TAF11;UHRF1BP1    |
| 7914218a      | 5.09E-05 | 1.20     | up   | 1.21     | up   | 1.09     | down | 1.22     | down | TAF12             |
| 8006573a      | 8.00E-06 | 1.18     | down | 1.04     | up   | 1.22     | down | 1.51     | down | TAF15             |
| 8003125a      | 8.59E-07 | 1.33     | up   | 1.22     | up   | 1.35     | up   | 1.11     | down | TAF1C             |
| 7951008a      | 7.64E-07 | 1.28     | down | 1.43     | up   | 1.39     | down | 1.24     | down | TAF1D             |
| 8152553a      | 1.55E-06 | 1.16     | up   | 1.14     | up   | 1.19     | up   | 1.31     | down | TAF2              |
| 8020702a      | 1.14E-06 | 1.23     | down | 1.50     | up   | 1.29     | down | 2.49     | down | TAF4B             |
| 8119503a      | 1.74E-05 | 1.11     | up   | 1.10     | up   | 1.18     | up   | 1.19     | down | TAF8              |
| 8176263a      | 2.01E-09 | 1.17     | up   | 1.41     | down | 1.25     | up   | 1.31     | down | TAF9B             |
| 7921487a      | 1.50E-08 | 1.11     | down | 1.18     | down | 1.08     | down | 1.48     | up   | TAGLN2            |
| 7937465a      | 8.15E-05 | 1.09     | up   | 1.04     | up   | 1.14     | up   | 1.21     | down | TALDO1            |
| 8009075a      | 2.14E-07 | 1.15     | down | 1.43     | down | 1.35     | down | 1.99     | up   | TANC2             |
| 8045933a      | 4.13E-06 | 1.30     | up   | 1.29     | down | 1.17     | up   | 1.06     | down | TANK              |
| 7994692a      | 9.21E-08 | 1.41     | up   | 1.01     | up   | 1.29     | up   | 1.01     | up   | TAOK2             |
| 8180166a      | 1.29E-06 | 1.10     | up   | 1.39     | down | 1.50     | up   | 1.19     | up   | TAPBP             |
| 8104760a      | 2.91E-05 | 1.21     | up   | 1.41     | up   | 1.13     | up   | 1.34     | down | TARS              |
| 7991640a      | 7.28E-06 | 1.21     | up   | 1.16     | up   | 1.37     | up   | 1.41     | down | TARSL2            |
| 8136844a      | 8.01E-05 | 1.06     | up   | 1.30     | up   | 1.04     | up   | 1.08     | down | TAS2R39           |
| 8065018a      | 2.99E-06 | 1.92     | down | 1.10     | up   | 1.81     | down | 1.20     | down | TASP1             |
| 8170865a      | 1.45E-05 | 1.07     | up   | 1.48     | down | 1.01     | down | 1.19     | up   | TAZ               |
| 8000856a      | 3.38E-05 | 1.37     | up   | 1.00     | up   | 1.17     | up   | 1.07     | up   | TBC1D10B          |
| 8094476a      | 3.27E-08 | 1.03     | up   | 2.39     | down | 1.01     | up   | 1.35     | up   | TBC1D19           |
| 8064336a      | 1.90E-06 | 1.66     | down | 1.04     | down | 1.77     | down | 1.07     | down | TBC1D20           |
| 8167314a      | 1.17E-08 | 1.34     | up   | 1.31     | down | 1.18     | up   | 1.02     | up   | TBC1D25           |
| 7990657a      | 3.74E-05 | 1.21     | up   | 1.52     | down | 1.27     | up   | 1.04     | up   | TBC1D2B           |
| 7985224a      | 4.78E-07 | 1.45     | up   | 1.66     | down | 1.49     | up   | 1.09     | down | TBC1D2B;LOC646938 |
| 8123961a      | 2.29E-10 | 1.57     | up   | 1.31     | down | 1.61     | up   | 1.24     | up   | TBC1D7            |
| 8102912a      | 2.07E-06 | 1.16     | down | 1.77     | down | 1.30     | down | 1.10     | up   | TBC1D9            |
| 7944623a      | 1.76E-06 | 1.15     | down | 1.47     | down | 1.10     | down | 1.15     | down | TBCEL             |
| 8102171a      | 5.26E-08 | 1.22     | down | 1.75     | down | 1.43     | down | 1.87     | up   | TBCK              |
| 8008016a      | 7.69E-09 | 1.35     | up   | 1.16     | up   | 1.34     | up   | 1.25     | down | TBKBP1            |
| 8140070a      | 1.72E-05 | 1.23     | up   | 1.21     | up   | 1.28     | up   | 1.09     | down | TBL2              |
| 7944850a      | 9.95E-06 | 1.03     | up   | 1.27     | down | 1.13     | up   | 1.28     | down | TBRG1             |
| 8127932a      | 1.97E-07 | 1.12     | up   | 1.23     | down | 1.20     | up   | 1.35     | up   | TBX18             |
| 8008969a      | 3.99E-06 | 1.02     | up   | 1.37     | up   | 1.10     | up   | 1.18     | down | TBX2              |
| 8138997a      | 4.43E-07 | 1.00     | down | 1.18     | up   | 1.22     | up   | 2.02     | down | TBX20             |
| 7966690a      | 2.79E-05 | 1.09     | up   | 1.46     | down | 1.49     | up   | 2.20     | up   | TBX3              |
| 8008982a      | 1.42E-06 | 1.10     | down | 1.26     | up   | 1.09     | down | 1.08     | down | TBX4              |

| Transcript ID | p-value  | Arsenic  |      | Chromium |      | Nickel   |      | Vanadium |      | Gene Symbol          |
|---------------|----------|----------|------|----------|------|----------|------|----------|------|----------------------|
|               |          | $\Delta$ | Reg  | $\Delta$ | Reg  | $\Delta$ | Reg  | $\Delta$ | Reg  |                      |
| 8032623a      | 8.36E-06 | 1.11     | up   | 1.24     | down | 1.29     | up   | 1.30     | up   | TBXA2R               |
| 8169049a      | 1.99E-06 | 1.26     | up   | 1.53     | down | 1.07     | up   | 1.02     | down | TCEAL1               |
| 8169044a      | 4.51E-06 | 1.22     | up   | 1.34     | down | 1.00     | up   | 1.04     | up   | TCEAL3               |
| 8169035a      | 1.85E-09 | 1.28     | up   | 1.52     | down | 1.17     | up   | 1.06     | down | TCEAL4               |
| 8174134a      | 8.46E-10 | 1.21     | up   | 1.63     | down | 1.02     | up   | 1.09     | up   | TCEAL6;TCEAL3;TCEAL2 |
| 8174228a      | 2.19E-06 | 1.59     | up   | 1.39     | down | 1.23     | down | 1.26     | up   | TCEAL8               |
| 7998852a      | 1.87E-06 | 1.04     | up   | 1.29     | down | 1.18     | down | 1.40     | up   | TCEB2                |
| 8108954a      | 2.94E-05 | 1.15     | down | 1.17     | up   | 1.10     | down | 1.19     | down | TCERG1               |
| 7983843a      | 9.22E-06 | 1.01     | up   | 1.41     | down | 1.08     | up   | 1.14     | down | TCF12                |
| 8177947a      | 5.61E-05 | 1.22     | up   | 1.16     | down | 1.47     | up   | 1.34     | up   | TCF19                |
| 8179228a      | 2.24E-07 | 1.23     | up   | 1.21     | down | 1.39     | up   | 1.31     | up   | TCF19                |
| 8076436a      | 2.08E-05 | 1.13     | up   | 1.38     | up   | 1.10     | up   | 1.25     | down | TCF20                |
| 7998033a      | 8.02E-07 | 1.41     | up   | 1.28     | up   | 1.58     | up   | 1.24     | down | TCF25                |
| 8023415a      | 3.57E-08 | 4.09     | up   | 1.62     | down | 5.74     | up   | 4.63     | down | TCF4                 |
| 7930537a      | 4.33E-08 | 1.04     | down | 1.48     | down | 1.22     | down | 1.34     | up   | TCF7L2               |
| 8109254a      | 7.12E-07 | 1.10     | down | 1.50     | up   | 1.09     | down | 1.13     | down | TCOF1                |
| 7935251a      | 3.28E-07 | 1.14     | down | 1.26     | up   | 1.08     | down | 1.22     | down | TCTN3                |
| 7969341a      | 2.46E-05 | 1.05     | down | 1.41     | down | 1.00     | up   | 1.26     | up   | TDRD3                |
| 8119386a      | 6.00E-05 | 1.07     | down | 1.23     | up   | 1.05     | down | 1.11     | up   | TDRG1                |
| 7920057a      | 1.42E-06 | 1.08     | up   | 1.23     | down | 1.19     | up   | 2.21     | down | TDRKH                |
| 8102789a      | 6.58E-06 | 1.08     | down | 1.13     | up   | 1.02     | up   | 1.34     | down | TERF1;LOC646359      |
| 8002289a      | 5.51E-06 | 1.17     | up   | 1.18     | down | 1.03     | up   | 1.30     | up   | TERF2                |
| 8135576a      | 4.85E-09 | 1.74     | down | 2.36     | down | 2.18     | down | 3.27     | up   | TES                  |
| 8096669a      | 5.65E-05 | 1.06     | up   | 1.70     | down | 1.06     | down | 1.19     | up   | TET2                 |
| 8096675a      | 2.25E-05 | 1.08     | up   | 1.82     | down | 1.08     | down | 1.39     | up   | TET2                 |
| 8042811a      | 8.68E-05 | 1.23     | up   | 1.29     | down | 1.10     | up   | 1.05     | up   | TET3                 |
| 8162850a      | 1.44E-05 | 1.05     | down | 1.36     | up   | 1.12     | down | 1.39     | down | TEX10                |
| 8017582a      | 3.02E-05 | 1.15     | up   | 1.09     | up   | 1.37     | up   | 1.00     | up   | TEX2                 |
| 8052925a      | 9.57E-05 | 1.05     | up   | 1.16     | up   | 1.12     | up   | 1.15     | down | TEX261               |
| 7927669a      | 3.67E-07 | 1.00     | down | 1.12     | up   | 1.26     | down | 1.41     | down | TFAM                 |
| 8116831a      | 1.15E-06 | 1.27     | up   | 1.02     | down | 1.47     | up   | 1.09     | up   | TFAP2A;LOC100130275  |
| 8123864a      | 1.05E-05 | 1.06     | down | 1.03     | down | 1.32     | up   | 1.38     | up   | TFAP2A;LOC100130275  |
| 8063536a      | 5.15E-08 | 2.00     | up   | 6.05     | up   | 4.58     | up   | 3.01     | down | TFAP2C               |
| 7999102a      | 2.78E-06 | 1.06     | up   | 1.63     | up   | 1.16     | down | 1.06     | down | TFAP4                |
| 8091103a      | 3.08E-05 | 1.15     | up   | 1.21     | up   | 1.41     | up   | 1.35     | down | TFDP2                |
| 8172520a      | 7.43E-05 | 1.26     | up   | 1.28     | down | 1.06     | up   | 1.13     | down | TFE3                 |
| 8126312a      | 1.99E-06 | 1.03     | up   | 1.21     | down | 1.14     | up   | 1.17     | up   | TFEB                 |
| 8057599a      | 5.39E-09 | 1.41     | up   | 2.48     | down | 1.21     | up   | 1.79     | up   | TFPI                 |
| 8037005a      | 3.50E-06 | 1.10     | up   | 1.80     | down | 1.25     | up   | 1.02     | down | TGFB1                |
| 7995206a      | 5.68E-06 | 1.01     | down | 1.26     | down | 1.08     | down | 1.71     | up   | TGFB11               |
| 8108217a      | 1.38E-05 | 1.28     | down | 1.86     | down | 1.26     | down | 1.61     | up   | TGFB1                |
| 8156826a      | 1.33E-05 | 1.64     | down | 1.01     | up   | 1.82     | down | 1.19     | up   | TGFBR1               |
| 8078350a      | 5.60E-10 | 1.39     | down | 2.59     | down | 1.84     | down | 2.54     | up   | TGFBR2               |
| 7917649a      | 9.67E-05 | 1.42     | up   | 1.32     | down | 1.47     | up   | 1.81     | up   | TGFBR3               |
| 8054364a      | 1.10E-05 | 1.39     | up   | 1.37     | up   | 1.15     | up   | 1.10     | down | TGFBRAP1             |
| 8168646a      | 3.43E-05 | 1.11     | down | 2.94     | up   | 1.05     | down | 1.78     | down | TGIF2LX;TGIF2LY      |
| 8051820a      | 1.92E-07 | 1.18     | up   | 1.14     | up   | 1.28     | up   | 1.21     | down | THADA                |
| 8150559a      | 3.47E-05 | 1.20     | up   | 1.11     | up   | 1.18     | up   | 1.39     | down | THAP1                |
| 8077250a      | 2.07E-06 | 1.40     | up   | 1.27     | up   | 1.35     | up   | 1.14     | down | THAP4                |
| 8065353a      | 7.89E-07 | 1.37     | down | 1.87     | down | 1.34     | down | 1.30     | up   | THBD                 |
| 8130867a      | 2.67E-05 | 6.04     | down | 1.12     | down | 1.13     | down | 1.03     | up   | THBS2                |
| 7926708a      | 5.24E-05 | 1.11     | down | 1.17     | down | 1.52     | down | 1.49     | up   | THNSL1               |
| 8021924a      | 3.19E-07 | 1.05     | down | 1.19     | up   | 1.09     | down | 1.60     | down | THOC1                |

| Transcript ID | p-value  | Arsenic |      | Chromium |      | Nickel |      | Vanadium |      | Gene Symbol    |
|---------------|----------|---------|------|----------|------|--------|------|----------|------|----------------|
|               |          | Δ       | Reg  | Δ        | Reg  | Δ      | Reg  | Δ        | Reg  |                |
| 8019273a      | 3.21E-08 | 1.40    | up   | 1.02     | down | 1.52   | up   | 1.07     | down | THOC4          |
| 8024497a      | 4.68E-05 | 1.03    | down | 1.31     | up   | 1.19   | up   | 1.19     | down | THOP1          |
| 8085797a      | 1.68E-07 | 1.12    | up   | 2.05     | down | 1.23   | down | 1.64     | up   | THRB           |
| 7971813a      | 4.45E-06 | 1.02    | up   | 1.49     | down | 1.11   | up   | 1.64     | up   | THSD1          |
| 7984588a      | 4.91E-06 | 1.45    | down | 1.44     | down | 1.52   | down | 1.54     | up   | THSD4          |
| 8000003a      | 1.02E-05 | 1.31    | up   | 1.22     | up   | 1.19   | up   | 1.12     | down | THUMPD1        |
| 7952268a      | 5.46E-05 | 1.01    | down | 1.07     | down | 2.13   | down | 1.08     | up   | THY1           |
| 7952869a      | 1.86E-07 | 1.02    | down | 1.54     | down | 1.03   | up   | 1.13     | down | THYN1          |
| 8122933a      | 3.32E-07 | 1.37    | up   | 1.68     | down | 1.48   | up   | 1.37     | up   | TIAM2          |
| 8172453a      | 9.23E-08 | 1.17    | up   | 1.25     | down | 1.19   | up   | 1.30     | down | TIMM17B        |
| 8003627a      | 1.19E-08 | 1.16    | up   | 1.35     | up   | 1.00   | up   | 1.28     | down | TIMM22         |
| 8033465a      | 1.68E-06 | 1.09    | down | 1.42     | up   | 1.02   | up   | 1.18     | down | TIMM44         |
| 8174047a      | 2.92E-05 | 1.21    | up   | 1.46     | down | 1.22   | down | 1.07     | down | TIMM8A         |
| 8167185a      | 2.92E-07 | 1.18    | up   | 1.46     | down | 1.01   | down | 1.32     | up   | TIMP1          |
| 8072626a      | 2.95E-09 | 2.53    | down | 9.68     | up   | 5.16   | down | 1.07     | down | TIMP3          |
| 8075635a      | 2.05E-07 | 1.66    | down | 3.39     | up   | 2.80   | down | 1.04     | up   | TIMP3          |
| 7978208a      | 3.27E-06 | 1.38    | up   | 1.28     | down | 1.27   | up   | 1.21     | up   | TINF2          |
| 8018849a      | 2.63E-05 | 1.19    | up   | 1.05     | up   | 1.29   | up   | 1.09     | down | TK1            |
| 8001818a      | 1.05E-05 | 1.04    | down | 1.95     | down | 1.00   | down | 1.67     | up   | TK2            |
| 8013771a      | 2.46E-09 | 2.10    | up   | 1.45     | up   | 2.01   | up   | 1.88     | down | TLCD1          |
| 8056734a      | 9.23E-08 | 1.29    | up   | 1.14     | down | 1.22   | up   | 1.02     | down | TLK1           |
| 8098214a      | 2.50E-07 | 1.60    | up   | 7.28     | down | 1.11   | up   | 3.95     | up   | TLL1           |
| 8161056a      | 4.23E-06 | 1.03    | up   | 1.24     | down | 1.00   | down | 1.39     | up   | TLN1           |
| 7984019a      | 3.51E-05 | 1.21    | up   | 1.09     | up   | 1.17   | down | 1.61     | up   | TLN2           |
| 8098611a      | 3.10E-06 | 1.62    | up   | 2.35     | down | 2.10   | up   | 1.33     | down | TLR3           |
| 8150364a      | 9.58E-05 | 1.08    | up   | 1.48     | down | 1.05   | up   | 1.24     | up   | TM2D2          |
| 7935320a      | 4.49E-08 | 1.20    | down | 1.13     | up   | 1.26   | down | 1.16     | down | TM9SF3         |
| 7959597a      | 1.37E-06 | 1.02    | down | 1.15     | up   | 1.06   | up   | 1.07     | down | TMED2          |
| 7980381a      | 8.90E-05 | 1.45    | up   | 1.06     | up   | 1.30   | up   | 1.05     | down | TMED8          |
| 8156905a      | 5.05E-05 | 1.30    | down | 1.01     | down | 1.48   | down | 1.04     | down | TMEFF1         |
| 8015900a      | 1.42E-05 | 1.07    | down | 1.56     | up   | 1.01   | up   | 1.38     | down | TMEM101        |
| 8013500a      | 1.05E-08 | 1.35    | up   | 1.47     | up   | 1.12   | up   | 1.37     | down | TMEM11;ENO1    |
| 7954985a      | 1.29E-09 | 2.19    | down | 1.24     | up   | 2.59   | down | 1.71     | up   | TMEM117        |
| 7951207a      | 1.42E-05 | 1.20    | down | 1.15     | up   | 1.09   | down | 1.10     | down | TMEM123        |
| 8053901a      | 1.20E-06 | 1.31    | up   | 1.15     | up   | 1.20   | up   | 1.04     | down | TMEM127        |
| 8099099a      | 3.21E-06 | 1.12    | down | 1.57     | down | 1.26   | down | 1.14     | up   | TMEM128        |
| 8120239a      | 8.21E-08 | 1.06    | up   | 1.73     | down | 1.05   | down | 2.12     | up   | TMEM14A        |
| 8116867a      | 4.41E-05 | 1.13    | up   | 1.08     | down | 1.15   | up   | 1.07     | up   | TMEM14B        |
| 8099850a      | 1.24E-07 | 1.07    | up   | 3.29     | down | 1.12   | up   | 2.51     | up   | TMEM156        |
| 8113023a      | 1.73E-05 | 1.09    | down | 1.49     | down | 1.08   | up   | 1.43     | up   | TMEM161B       |
| 8169365a      | 7.52E-08 | 1.40    | up   | 1.40     | down | 1.35   | up   | 1.13     | up   | TMEM164        |
| 8095148a      | 1.27E-07 | 1.16    | down | 1.44     | down | 1.26   | down | 1.24     | up   | TMEM165        |
| 8112967a      | 3.80E-08 | 1.28    | down | 1.34     | down | 1.23   | down | 1.76     | up   | TMEM167A       |
| 8039905a      | 7.50E-05 | 1.23    | up   | 1.24     | up   | 1.02   | up   | 1.04     | down | TMEM167B       |
| 8044844a      | 1.42E-06 | 1.44    | up   | 1.50     | up   | 1.11   | up   | 1.12     | down | TMEM177        |
| 8175621a      | 2.70E-07 | 1.14    | down | 1.49     | down | 1.48   | down | 1.39     | up   | TMEM185A       |
| 7999317a      | 5.43E-05 | 1.29    | up   | 1.53     | up   | 1.07   | up   | 1.30     | down | TMEM186        |
| 7995448a      | 8.98E-08 | 1.02    | up   | 1.42     | down | 1.21   | up   | 1.51     | up   | TMEM188        |
| 8066964a      | 4.00E-07 | 1.11    | up   | 1.16     | down | 1.23   | up   | 1.14     | up   | TMEM189-UBE2V1 |
| 7957167a      | 4.93E-05 | 1.19    | down | 1.16     | down | 1.18   | down | 1.20     | up   | TMEM19         |
| 8071541a      | 9.82E-06 | 1.22    | up   | 1.03     | up   | 1.40   | up   | 1.04     | up   | TMEM191A-C     |
| 7897469a      | 2.53E-09 | 1.02    | down | 1.85     | up   | 1.03   | down | 1.24     | down | TMEM201        |
| 8165486a      | 6.88E-06 | 1.19    | down | 1.31     | up   | 1.07   | down | 1.24     | down | TMEM203        |

| Transcript ID | Arsenic  |          |      | Chromium |      | Nickel   |      | Vanadium |      | Gene Symbol     |
|---------------|----------|----------|------|----------|------|----------|------|----------|------|-----------------|
|               | p-value  | $\Delta$ | Reg  | $\Delta$ | Reg  | $\Delta$ | Reg  | $\Delta$ | Reg  |                 |
| 8165642a      | 6.37E-05 | 1.16     | down | 1.27     | up   | 1.09     | down | 1.24     | down | TMEM203         |
| 8142912a      | 3.36E-05 | 1.05     | up   | 1.21     | up   | 1.23     | up   | 1.13     | down | TMEM209         |
| 8040753a      | 1.85E-06 | 1.39     | up   | 1.13     | up   | 1.17     | up   | 1.02     | up   | TMEM214         |
| 8154760a      | 1.87E-08 | 1.25     | down | 2.70     | up   | 1.68     | down | 1.32     | down | TMEM215         |
| 7952484a      | 2.01E-08 | 1.19     | up   | 1.55     | down | 1.41     | up   | 1.27     | down | TMEM218         |
| 7994683a      | 3.88E-08 | 1.44     | up   | 1.22     | down | 1.38     | up   | 1.13     | up   | TMEM219         |
| 7899310a      | 1.55E-06 | 1.13     | up   | 1.32     | up   | 1.11     | up   | 1.25     | down | TMEM222         |
| 8026579a      | 4.53E-05 | 1.15     | up   | 1.28     | up   | 1.19     | up   | 1.20     | down | TMEM38A         |
| 8157092a      | 1.21E-07 | 1.22     | up   | 1.84     | up   | 1.31     | up   | 2.36     | down | TMEM38B         |
| 8092534a      | 3.47E-05 | 1.19     | up   | 1.38     | up   | 1.10     | up   | 1.31     | down | TMEM41A         |
| 8172022a      | 5.46E-11 | 1.56     | down | 1.37     | up   | 1.49     | down | 60.58    | up   | TMEM47          |
| 7956749a      | 5.67E-05 | 1.37     | up   | 1.28     | up   | 1.25     | up   | 1.27     | down | TMEM5           |
| 7911634a      | 6.40E-06 | 1.17     | up   | 1.01     | down | 1.30     | up   | 1.07     | up   | TMEM52          |
| 7914592a      | 6.21E-06 | 1.14     | up   | 1.40     | up   | 1.28     | up   | 1.09     | down | TMEM54          |
| 8151756a      | 4.93E-06 | 1.37     | up   | 1.46     | down | 1.01     | up   | 1.52     | up   | TMEM55A         |
| 7983157a      | 1.40E-06 | 1.10     | up   | 1.05     | down | 1.33     | up   | 1.83     | down | TMEM62          |
| 8150089a      | 7.05E-06 | 1.09     | up   | 1.46     | down | 1.05     | up   | 1.29     | up   | TMEM66          |
| 8147313a      | 1.79E-06 | 1.18     | down | 1.47     | up   | 1.21     | up   | 1.38     | down | TMEM67          |
| 8146930a      | 3.09E-05 | 1.04     | down | 1.14     | up   | 1.05     | up   | 1.31     | down | TMEM70          |
| 7982507a      | 3.54E-06 | 1.03     | up   | 1.24     | down | 1.13     | up   | 1.12     | down | TMEM85          |
| 8044417a      | 1.34E-05 | 1.63     | up   | 1.13     | up   | 1.39     | up   | 1.13     | up   | TMEM87B         |
| 7998233a      | 1.56E-05 | 1.13     | up   | 1.18     | down | 1.08     | down | 1.48     | up   | TMEM8A          |
| 8003840a      | 2.48E-07 | 1.39     | up   | 1.12     | up   | 1.17     | up   | 1.32     | down | TMEM93          |
| 8005839a      | 1.52E-06 | 1.21     | up   | 1.24     | up   | 1.35     | up   | 1.57     | down | TMEM97          |
| 8006415a      | 1.02E-08 | 1.09     | down | 2.91     | up   | 1.13     | up   | 8.66     | down | TMEM98          |
| 8007108a      | 3.66E-06 | 1.07     | down | 1.37     | up   | 1.13     | down | 1.93     | down | TMEM99          |
| 8176255a      | 4.93E-06 | 1.35     | down | 2.05     | down | 1.30     | down | 1.21     | up   | TMLHE           |
| 8156706a      | 8.59E-07 | 1.05     | up   | 1.01     | down | 2.43     | up   | 1.19     | down | TMOD1           |
| 7983734a      | 4.43E-07 | 2.24     | down | 2.77     | down | 2.99     | down | 1.96     | up   | TMOD2           |
| 7983744a      | 8.10E-06 | 1.13     | down | 1.77     | down | 1.22     | down | 1.11     | up   | TMOD3           |
| 8043100a      | 1.06E-07 | 1.08     | up   | 1.12     | down | 1.05     | up   | 1.18     | up   | TMSB10          |
| 8007594a      | 8.38E-07 | 1.14     | up   | 1.11     | up   | 1.32     | up   | 1.61     | down | TMUB2           |
| 8064939a      | 4.49E-05 | 3.19     | down | 1.77     | down | 1.82     | down | 1.35     | up   | TMX4            |
| 8163637a      | 7.20E-07 | 1.83     | down | 1.86     | down | 2.70     | down | 4.19     | up   | TNC             |
| 7977046a      | 2.21E-05 | 1.07     | up   | 1.40     | down | 1.66     | up   | 1.79     | down | TNFAIP2         |
| 8107520a      | 4.61E-06 | 1.05     | down | 2.00     | down | 1.03     | up   | 1.35     | up   | TNFAIP8         |
| 7988763a      | 1.72E-08 | 1.11     | up   | 2.61     | down | 1.10     | up   | 1.50     | up   | TNFAIP8L3       |
| 8149749a      | 1.51E-05 | 1.15     | down | 1.02     | down | 1.57     | down | 1.77     | up   | TNFRSF10D       |
| 8021528a      | 2.18E-06 | 1.30     | up   | 1.48     | down | 1.14     | up   | 1.15     | up   | TNFRSF11A       |
| 8152512a      | 1.16E-07 | 1.19     | up   | 2.62     | up   | 1.03     | down | 8.25     | down | TNFRSF11B       |
| 7992789a      | 2.85E-07 | 1.05     | down | 1.17     | down | 1.29     | down | 1.32     | up   | TNFRSF12A       |
| 8004464a      | 3.67E-07 | 1.21     | up   | 1.00     | up   | 1.24     | up   | 1.48     | down | TNFSF12-TNFSF13 |
| 8092095a      | 8.42E-06 | 1.18     | down | 2.14     | up   | 2.54     | down | 1.87     | up   | TNIK            |
| 8099029a      | 8.68E-08 | 1.28     | up   | 1.25     | down | 1.18     | up   | 1.12     | down | TNIP2           |
| 7929168a      | 2.82E-07 | 1.22     | down | 1.04     | up   | 1.32     | down | 1.08     | down | TNKS2           |
| 8132980a      | 5.97E-05 | 1.07     | up   | 1.26     | up   | 1.06     | up   | 1.02     | up   | TNRC18          |
| 8058869a      | 5.30E-06 | 1.16     | up   | 2.13     | down | 1.54     | down | 1.09     | up   | TNS1            |
| 8015016a      | 5.36E-05 | 1.06     | down | 1.29     | down | 1.04     | down | 1.08     | up   | TNS4            |
| 8179935a      | 8.62E-05 | 1.33     | up   | 1.27     | up   | 1.13     | up   | 1.05     | down | TNXB;TNXA       |
| 7901091a      | 7.18E-06 | 1.14     | up   | 1.29     | up   | 1.00     | up   | 1.10     | down | TOE1            |
| 7945620a      | 1.02E-07 | 1.42     | up   | 1.15     | up   | 1.27     | up   | 1.04     | down | TOLLIP          |
| 8029521a      | 1.36E-08 | 1.12     | down | 1.33     | up   | 1.35     | down | 1.21     | down | TOMM40          |
| 8014974a      | 6.02E-08 | 1.31     | down | 1.32     | up   | 1.08     | down | 1.63     | down | TOP2A           |

| Transcript ID | p-value  | Arsenic |      | Chromium |      | Nickel |      | Vanadium |      | Gene Symbol             |
|---------------|----------|---------|------|----------|------|--------|------|----------|------|-------------------------|
|               |          | Δ       | Reg  | Δ        | Reg  | Δ      | Reg  | Δ        | Reg  |                         |
| 8013222a      | 9.80E-05 | 1.15    | up   | 1.31     | up   | 1.13   | up   | 1.08     | down | TOP3A                   |
| 8164587a      | 5.20E-05 | 1.14    | up   | 1.15     | up   | 1.19   | up   | 1.45     | down | TOR1A                   |
| 8158560a      | 5.31E-05 | 1.15    | down | 1.36     | up   | 1.09   | down | 1.32     | down | TOR1B                   |
| 8150962a      | 1.33E-08 | 2.48    | up   | 4.16     | up   | 8.08   | up   | 5.19     | down | TOX                     |
| 8062782a      | 1.52E-07 | 1.31    | up   | 1.09     | down | 1.42   | up   | 2.61     | up   | TOX2                    |
| 7988093a      | 1.03E-05 | 1.03    | up   | 1.48     | down | 1.13   | up   | 1.22     | down | TP53BP1                 |
| 7924526a      | 7.99E-06 | 1.01    | down | 1.41     | down | 1.36   | down | 1.11     | up   | TP53BP2                 |
| 8050702a      | 2.70E-06 | 1.48    | up   | 1.54     | down | 1.09   | up   | 1.38     | up   | TP53I3                  |
| 7897179a      | 1.09E-05 | 1.10    | down | 1.39     | up   | 1.35   | up   | 1.27     | down | TP73                    |
| 8120880a      | 1.94E-05 | 1.32    | up   | 1.02     | down | 1.54   | up   | 1.07     | down | TPBG                    |
| 8151475a      | 5.86E-09 | 1.22    | up   | 1.63     | up   | 1.58   | up   | 1.98     | down | TPD52                   |
| 8143643a      | 4.31E-07 | 1.08    | down | 1.57     | down | 1.27   | down | 1.44     | up   | TPK1                    |
| 7984079a      | 3.09E-06 | 1.09    | down | 1.69     | down | 1.02   | up   | 1.27     | up   | TPM1                    |
| 8161044a      | 4.84E-05 | 1.46    | up   | 1.01     | up   | 1.33   | up   | 1.20     | up   | TPM2                    |
| 7920472a      | 1.61E-05 | 1.12    | up   | 1.32     | down | 1.00   | up   | 1.03     | down | TPM3                    |
| 8124134a      | 1.24E-05 | 1.29    | up   | 1.04     | down | 1.22   | up   | 1.07     | up   | TPMT                    |
| 8133155a      | 1.40E-06 | 1.29    | up   | 1.16     | down | 1.36   | up   | 1.08     | up   | TPST1                   |
| 8074003a      | 5.22E-06 | 1.14    | up   | 1.22     | up   | 1.15   | up   | 1.15     | down | TRABD                   |
| 8001938a      | 9.86E-06 | 1.31    | up   | 1.10     | down | 1.31   | up   | 1.04     | up   | TRADD                   |
| 8159476a      | 1.13E-05 | 1.07    | down | 1.33     | up   | 1.04   | up   | 1.41     | down | TRAF2                   |
| 8049635a      | 1.44E-06 | 1.26    | up   | 1.29     | up   | 1.30   | up   | 1.21     | down | TRAF3IP1                |
| 8128939a      | 2.76E-06 | 1.28    | up   | 1.23     | down | 1.44   | up   | 1.17     | up   | TRAF3IP2                |
| 7909545a      | 1.60E-05 | 1.17    | down | 1.48     | down | 1.16   | down | 1.41     | up   | TRAF5                   |
| 7992529a      | 1.10E-05 | 1.00    | down | 1.04     | down | 1.32   | down | 1.38     | up   | TRAF7;CASKIN1           |
| 8127051a      | 5.37E-06 | 1.03    | down | 1.07     | up   | 1.21   | up   | 1.48     | up   | TRAM2                   |
| 7997852a      | 5.60E-08 | 1.43    | up   | 1.40     | up   | 1.60   | up   | 1.19     | down | TRAPPC2L                |
| 7914887a      | 7.00E-05 | 1.05    | up   | 1.13     | up   | 1.08   | down | 1.17     | down | TRAPPC3;KIAA0100        |
| 8126402a      | 8.69E-05 | 1.32    | up   | 1.10     | down | 1.30   | up   | 1.28     | up   | TRERF1                  |
| 8040365a      | 3.67E-08 | 1.47    | up   | 2.28     | down | 1.35   | up   | 1.55     | up   | TRIB2                   |
| 8060344a      | 4.08E-06 | 1.48    | down | 1.09     | up   | 1.47   | down | 1.01     | up   | TRIB3                   |
| 7969153a      | 9.32E-05 | 1.16    | down | 1.11     | down | 1.22   | down | 1.30     | up   | TRIM13;KCNRG            |
| 8162729a      | 5.83E-08 | 1.02    | down | 1.55     | up   | 1.03   | up   | 1.64     | down | TRIM14                  |
| 8012953a      | 1.38E-05 | 1.73    | up   | 1.47     | down | 1.73   | up   | 1.43     | up   | TRIM16                  |
| 8005475a      | 2.63E-06 | 2.24    | up   | 1.64     | down | 2.15   | up   | 1.01     | up   | TRIM16L                 |
| 7945962a      | 1.98E-05 | 1.24    | up   | 1.01     | up   | 1.12   | up   | 1.38     | down | TRIM21                  |
| 8136473a      | 9.11E-08 | 1.21    | up   | 1.52     | up   | 1.25   | up   | 1.30     | down | TRIM24                  |
| 8179638a      | 1.55E-06 | 1.47    | up   | 1.15     | up   | 1.61   | up   | 1.05     | up   | TRIM26                  |
| 8179575a      | 1.02E-07 | 1.48    | up   | 1.16     | up   | 1.40   | up   | 1.02     | up   | TRIM27                  |
| 7918725a      | 6.26E-05 | 1.05    | down | 1.18     | up   | 1.19   | down | 1.07     | down | TRIM33                  |
| 8149907a      | 2.36E-05 | 1.22    | up   | 1.12     | down | 1.08   | up   | 1.08     | up   | TRIM35                  |
| 8113577a      | 5.05E-07 | 1.32    | down | 1.57     | up   | 1.41   | down | 2.11     | down | TRIM36                  |
| 8017106a      | 9.37E-05 | 1.14    | up   | 1.01     | down | 1.23   | up   | 1.25     | down | TRIM37                  |
| 8117321a      | 1.07E-08 | 1.90    | up   | 1.21     | down | 1.99   | up   | 1.10     | up   | TRIM38                  |
| 8179088a      | 1.14E-05 | 1.36    | up   | 1.29     | up   | 1.40   | up   | 1.05     | down | TRIM39;TRIM39R          |
| 8018494a      | 6.48E-05 | 1.16    | up   | 1.19     | down | 1.17   | up   | 1.04     | down | TRIM47                  |
| 7911218a      | 9.03E-06 | 1.84    | up   | 2.03     | up   | 1.06   | up   | 2.22     | down | TRIM58;OR2W3            |
| 8091757a      | 7.82E-08 | 1.02    | down | 1.53     | up   | 1.37   | up   | 1.88     | down | TRIM59                  |
| 7914630a      | 3.25E-06 | 1.46    | up   | 1.06     | up   | 1.61   | up   | 1.06     | up   | TRIM62                  |
| 7950965a      | 3.09E-06 | 1.01    | down | 1.21     | up   | 1.02   | down | 1.30     | down | TRIM64;TRIM64B/C;TRIM77 |
| 8025058a      | 1.58E-06 | 1.08    | up   | 1.30     | down | 1.32   | up   | 1.08     | up   | TRIP10                  |
| 8059596a      | 9.72E-06 | 1.19    | up   | 1.00     | up   | 1.15   | up   | 1.11     | down | TRIP12                  |
| 7984190a      | 1.32E-06 | 1.07    | up   | 1.61     | down | 1.00   | up   | 1.00     | up   | TRIP4                   |
| 7915261a      | 2.32E-05 | 1.07    | up   | 1.25     | up   | 1.11   | down | 1.11     | down | TRIT1                   |



| Transcript ID | p-value  | Arsenic  |      | Chromium |      | Nickel   |      | Vanadium |      | Gene Symbol        |
|---------------|----------|----------|------|----------|------|----------|------|----------|------|--------------------|
|               |          | $\Delta$ | Reg  | $\Delta$ | Reg  | $\Delta$ | Reg  | $\Delta$ | Reg  |                    |
| 8174005a      | 5.67E-06 | 1.30     | up   | 1.29     | down | 1.23     | up   | 1.26     | down | TRMT2B             |
| 8064879a      | 2.76E-07 | 1.60     | down | 1.18     | up   | 2.03     | down | 1.12     | down | TRMT6              |
| 8073875a      | 8.65E-07 | 1.34     | up   | 1.39     | up   | 1.20     | up   | 1.29     | down | TRMU               |
| 8167835a      | 1.65E-06 | 2.17     | up   | 1.13     | down | 1.73     | up   | 1.01     | down | TRO                |
| 7971104a      | 1.65E-06 | 1.66     | up   | 7.80     | down | 2.10     | up   | 1.64     | up   | TRPC4              |
| 8069085a      | 6.14E-06 | 1.09     | down | 1.26     | up   | 1.04     | down | 1.11     | down | TRPM2              |
| 8030251a      | 9.41E-07 | 1.09     | up   | 1.31     | down | 1.07     | up   | 1.28     | up   | TRPM4              |
| 8164781a      | 2.47E-06 | 1.11     | up   | 1.28     | up   | 1.35     | up   | 1.73     | down | TSC1               |
| 7992474a      | 1.31E-05 | 1.14     | down | 1.18     | down | 1.18     | down | 1.37     | up   | TSC2               |
| 7971350a      | 4.64E-10 | 1.05     | up   | 1.38     | down | 1.22     | down | 2.05     | up   | TSC22D1            |
| 8174361a      | 9.34E-09 | 1.08     | up   | 1.89     | down | 1.01     | up   | 1.18     | up   | TSC22D3            |
| 8009832a      | 8.54E-07 | 1.19     | up   | 1.31     | up   | 1.22     | up   | 1.12     | down | TSEN54             |
| 8054166a      | 2.83E-05 | 1.28     | up   | 1.08     | up   | 1.04     | up   | 1.29     | down | TSGA10             |
| 8063444a      | 8.77E-05 | 1.06     | up   | 1.09     | up   | 1.01     | down | 2.33     | up   | TSHZ2;LOC100288461 |
| 8131600a      | 3.68E-05 | 2.37     | up   | 2.62     | up   | 1.40     | up   | 1.00     | up   | TSPAN13            |
| 7928046a      | 4.69E-10 | 1.38     | up   | 2.13     | down | 1.70     | up   | 2.17     | up   | TSPAN15            |
| 8110224a      | 4.70E-08 | 1.28     | up   | 1.12     | up   | 1.54     | up   | 1.30     | down | TSPAN17            |
| 8136067a      | 4.37E-07 | 1.23     | up   | 1.33     | up   | 1.94     | up   | 1.74     | down | TSPAN33            |
| 8101828a      | 8.17E-08 | 1.21     | down | 1.64     | down | 1.46     | down | 2.14     | up   | TSPAN5             |
| 7953166a      | 6.31E-05 | 1.19     | up   | 1.60     | up   | 1.37     | up   | 1.25     | down | TSPAN9             |
| 8073612a      | 4.69E-05 | 1.13     | up   | 1.35     | down | 1.07     | up   | 1.33     | up   | TSPO               |
| 8011245a      | 2.06E-08 | 1.10     | up   | 1.50     | up   | 1.27     | down | 1.35     | down | TSR1;SRR           |
| 8167790a      | 1.38E-05 | 1.15     | up   | 1.04     | down | 1.05     | up   | 1.57     | down | TSR2               |
| 8050060a      | 5.82E-05 | 1.29     | up   | 1.06     | down | 1.23     | up   | 1.23     | up   | TSSC1              |
| 7937813a      | 2.59E-05 | 1.13     | up   | 1.08     | up   | 1.15     | up   | 1.11     | down | TSSC4              |
| 8035684a      | 7.45E-05 | 1.03     | down | 1.45     | up   | 1.04     | up   | 1.05     | down | TSSK6              |
| 8075857a      | 8.51E-05 | 1.60     | up   | 1.03     | down | 1.11     | up   | 1.69     | down | TST                |
| 8153474a      | 6.04E-08 | 1.22     | down | 1.65     | down | 1.27     | down | 1.76     | up   | TSTA3              |
| 7943919a      | 1.00E-06 | 1.18     | down | 1.44     | up   | 1.02     | down | 1.75     | down | TTC12              |
| 7925003a      | 1.34E-05 | 1.43     | down | 1.13     | down | 1.67     | down | 1.03     | up   | TTC13              |
| 8040018a      | 4.62E-05 | 1.08     | up   | 1.32     | down | 1.07     | up   | 1.32     | up   | TTC15              |
| 7991485a      | 3.08E-05 | 1.02     | up   | 1.53     | down | 1.07     | up   | 1.06     | up   | TTC23              |
| 8007176a      | 4.06E-05 | 1.04     | down | 1.30     | up   | 1.01     | up   | 1.32     | down | TTC25              |
| 8136495a      | 8.46E-10 | 1.46     | up   | 1.86     | up   | 1.86     | up   | 1.85     | down | TTC26              |
| 8041360a      | 2.44E-08 | 1.32     | up   | 1.34     | up   | 1.13     | up   | 1.29     | down | TTC27              |
| 8075142a      | 1.62E-08 | 1.38     | up   | 1.51     | down | 1.29     | up   | 2.26     | down | TTC28;LOC284900    |
| 8056999a      | 1.19E-08 | 1.34     | up   | 1.01     | up   | 1.55     | up   | 1.33     | down | TTC30A             |
| 8042874a      | 2.52E-06 | 1.07     | up   | 1.34     | down | 1.19     | up   | 1.16     | up   | TTC31              |
| 8113157a      | 9.15E-08 | 1.21     | down | 1.58     | down | 1.01     | up   | 1.80     | up   | TTC37              |
| 8073842a      | 1.02E-09 | 1.06     | up   | 1.36     | up   | 1.15     | up   | 1.39     | down | TTC38              |
| 7901662a      | 4.05E-07 | 1.08     | up   | 1.40     | up   | 1.14     | down | 1.11     | down | TTC4               |
| 8041826a      | 2.08E-05 | 1.31     | up   | 1.15     | down | 1.32     | up   | 1.18     | up   | TTC7A              |
| 8048411a      | 7.97E-07 | 1.37     | up   | 1.40     | up   | 1.39     | up   | 1.07     | down | TTL4               |
| 7917199a      | 1.46E-05 | 1.24     | down | 1.56     | down | 2.27     | down | 1.60     | up   | TTL7               |
| 8151042a      | 2.92E-06 | 1.44     | down | 1.09     | down | 1.66     | down | 1.10     | up   | TTPA               |
| 8124262a      | 1.09E-07 | 1.29     | up   | 1.00     | down | 1.36     | up   | 1.05     | down | TTRAP              |
| 8177217a      | 3.41E-07 | 1.11     | down | 1.24     | down | 1.13     | down | 1.41     | up   | TTY14              |
| 8009568a      | 4.49E-05 | 1.15     | up   | 1.08     | up   | 1.32     | up   | 1.13     | down | TTYH2              |
| 7938269a      | 1.23E-05 | 1.06     | up   | 1.37     | up   | 1.06     | up   | 1.75     | up   | TUB                |
| 7963054a      | 2.71E-08 | 1.16     | down | 2.21     | down | 1.09     | down | 2.36     | up   | TUBA1A             |
| 7998063a      | 2.57E-05 | 1.25     | up   | 1.08     | up   | 1.38     | up   | 1.16     | up   | TUBB3;MC1R         |
| 8159786a      | 4.53E-05 | 1.13     | down | 1.17     | up   | 1.12     | down | 1.28     | down | TUBBP5;TUBB4Q      |
| 8007302a      | 1.25E-06 | 1.01     | up   | 1.35     | up   | 1.04     | up   | 1.31     | down | TUBG1              |

| Transcript ID | p-value  | Arsenic  |      | Chromium |      | Nickel   |      | Vanadium |      | Gene Symbol  |
|---------------|----------|----------|------|----------|------|----------|------|----------|------|--------------|
|               |          | $\Delta$ | Reg  | $\Delta$ | Reg  | $\Delta$ | Reg  | $\Delta$ | Reg  |              |
| 8007312a      | 1.74E-06 | 1.09     | up   | 1.59     | up   | 1.17     | down | 1.24     | down | TUBG2        |
| 7937175a      | 1.33E-05 | 1.09     | down | 1.10     | up   | 1.06     | down | 1.40     | up   | TUBGCP2      |
| 7983206a      | 2.85E-10 | 1.32     | up   | 1.27     | down | 1.44     | up   | 1.46     | down | TUBGCP4      |
| 8000603a      | 7.35E-06 | 1.32     | up   | 1.35     | up   | 1.15     | up   | 1.07     | down | TUFM         |
| 7905428a      | 5.57E-05 | 1.19     | down | 1.60     | down | 1.49     | down | 1.14     | up   | TUFT1        |
| 8144726a      | 2.16E-05 | 1.24     | down | 1.43     | down | 1.06     | down | 1.29     | up   | TUSC3        |
| 7899703a      | 2.94E-05 | 1.20     | up   | 1.29     | up   | 1.15     | up   | 1.02     | down | TXLNA        |
| 7999478a      | 8.62E-05 | 1.44     | up   | 1.47     | up   | 1.10     | up   | 1.03     | down | TXNDC11      |
| 7904726a      | 1.73E-06 | 1.83     | down | 1.03     | up   | 3.09     | down | 1.30     | up   | TXNIP        |
| 8023450a      | 9.05E-07 | 1.11     | up   | 1.52     | down | 1.04     | up   | 1.22     | up   | TXNL1        |
| 8002660a      | 6.62E-05 | 1.16     | up   | 1.31     | down | 1.09     | up   | 1.65     | up   | TXNL4B       |
| 8154367a      | 1.29E-05 | 1.06     | up   | 1.03     | up   | 2.03     | up   | 1.01     | down | TYRP1        |
| 8139935a      | 8.53E-05 | 1.03     | up   | 1.08     | up   | 1.04     | down | 1.44     | down | TYW1B        |
| 8070655a      | 4.25E-06 | 1.02     | up   | 1.23     | up   | 1.01     | up   | 1.30     | down | U2AF1        |
| 8036143a      | 7.65E-05 | 1.13     | down | 1.17     | up   | 1.02     | down | 1.37     | down | U2AF1L4      |
| 7990054a      | 5.94E-05 | 1.05     | down | 1.72     | down | 1.27     | up   | 1.16     | down | UACA         |
| 8167069a      | 6.43E-08 | 1.23     | up   | 1.14     | down | 1.12     | up   | 1.19     | down | UBA1         |
| 8027650a      | 9.67E-06 | 1.17     | down | 1.11     | up   | 1.27     | down | 1.11     | down | UBA2         |
| 8087485a      | 5.76E-05 | 1.02     | down | 1.53     | down | 1.16     | up   | 1.10     | up   | UBA7         |
| 8165064a      | 4.94E-05 | 1.12     | down | 1.18     | up   | 1.15     | up   | 1.45     | down | UBAC1        |
| 8169645a      | 5.15E-06 | 1.15     | up   | 1.26     | down | 1.02     | up   | 1.15     | down | UBE2A        |
| 8132523a      | 3.22E-05 | 1.11     | up   | 1.20     | up   | 1.35     | up   | 1.18     | down | UBE2D4       |
| 8078252a      | 3.54E-08 | 1.09     | down | 1.25     | down | 2.29     | down | 1.00     | up   | UBE2E2       |
| 8070799a      | 2.50E-05 | 1.11     | down | 1.43     | up   | 1.16     | down | 1.43     | down | UBE2G2;SUMO3 |
| 8142886a      | 1.65E-05 | 1.02     | up   | 1.25     | down | 1.01     | up   | 1.32     | up   | UBE2H        |
| 7992205a      | 2.52E-06 | 1.04     | down | 1.10     | down | 1.18     | down | 1.27     | up   | UBE2I        |
| 7944195a      | 1.38E-06 | 1.01     | up   | 1.24     | up   | 1.03     | up   | 1.31     | down | UBE4A        |
| 7970831a      | 8.10E-09 | 1.28     | down | 1.49     | down | 2.12     | down | 2.02     | up   | UBL3         |
| 8176098a      | 4.27E-08 | 1.08     | down | 1.78     | down | 1.24     | down | 1.33     | up   | UBL4A        |
| 7990361a      | 5.38E-06 | 1.17     | up   | 1.19     | down | 1.29     | up   | 1.15     | down | UBL7         |
| 7993035a      | 3.65E-07 | 1.06     | up   | 1.36     | down | 1.30     | down | 1.33     | up   | UBN1         |
| 8136516a      | 1.65E-07 | 1.18     | up   | 1.36     | up   | 1.35     | up   | 1.47     | down | UBN2         |
| 8161988a      | 3.12E-05 | 1.00     | down | 1.31     | up   | 1.01     | up   | 1.28     | down | UBQLN1       |
| 8091352a      | 1.62E-05 | 1.29     | up   | 1.08     | down | 1.05     | up   | 1.39     | up   | UBQLN4       |
| 8026490a      | 4.43E-06 | 1.05     | down | 1.07     | down | 1.07     | down | 2.73     | down | UCA1         |
| 7969428a      | 5.64E-06 | 1.12     | down | 1.47     | down | 1.30     | down | 1.42     | up   | UCHL3        |
| 7950307a      | 1.92E-09 | 1.33     | down | 2.59     | up   | 1.03     | down | 2.50     | down | UCP2         |
| 7947027a      | 9.67E-06 | 1.29     | up   | 1.14     | up   | 1.24     | up   | 1.27     | down | UEVLD        |
| 7906662a      | 2.46E-06 | 1.12     | down | 1.70     | down | 1.24     | down | 1.23     | up   | UFC1         |
| 8157216a      | 2.51E-05 | 1.46     | down | 1.11     | up   | 1.35     | down | 1.32     | down | UGCG         |
| 8099897a      | 5.75E-05 | 1.41     | up   | 1.49     | up   | 1.17     | up   | 1.07     | up   | UGDH         |
| 7972369a      | 2.68E-06 | 1.59     | down | 1.10     | down | 1.98     | down | 1.19     | down | UGGT2        |
| 8097017a      | 6.90E-09 | 1.98     | up   | 6.42     | up   | 1.19     | down | 1.20     | down | UGT8         |
| 8122724a      | 7.37E-06 | 1.08     | down | 2.27     | up   | 1.05     | up   | 1.72     | down | ULBP1        |
| 8013399a      | 4.08E-05 | 1.07     | down | 1.26     | up   | 1.59     | up   | 1.48     | down | ULK2         |
| 8086352a      | 6.14E-06 | 1.75     | down | 1.12     | down | 1.40     | down | 1.04     | down | ULK4         |
| 8013633a      | 1.44E-05 | 1.27     | up   | 1.17     | up   | 1.20     | up   | 1.12     | down | UNC119       |
| 7960362a      | 6.66E-09 | 1.01     | down | 1.61     | up   | 1.06     | down | 2.10     | down | UNQ3104      |
| 7992996a      | 1.64E-07 | 1.03     | up   | 1.08     | down | 1.49     | down | 1.65     | up   | UNQ3118      |
| 8116722a      | 1.49E-05 | 1.07     | up   | 1.47     | up   | 1.42     | down | 1.43     | down | UNQ5815      |
| 8174717a      | 7.33E-05 | 1.16     | up   | 1.21     | down | 1.07     | up   | 1.59     | down | UPF3B        |
| 8133741a      | 1.98E-06 | 1.09     | down | 1.22     | up   | 1.04     | down | 1.01     | down | UPK3B        |
| 8069943a      | 4.11E-05 | 1.08     | up   | 1.51     | up   | 1.02     | down | 1.20     | down | URB1         |

| Transcript ID | Arsenic  |      |      | Chromium |      | Nickel |      | Vanadium |      | Gene Symbol          |
|---------------|----------|------|------|----------|------|--------|------|----------|------|----------------------|
|               | p-value  | Δ    | Reg  | Δ        | Reg  | Δ      | Reg  | Δ        | Reg  |                      |
| 7997633a      | 1.34E-08 | 1.39 | up   | 1.52     | up   | 1.45   | up   | 1.30     | down | USP10                |
| 8167125a      | 5.30E-06 | 1.28 | up   | 1.17     | down | 1.07   | up   | 1.08     | up   | USP11                |
| 8019807a      | 2.62E-05 | 1.07 | down | 1.17     | up   | 1.12   | down | 1.27     | down | USP14                |
| 8071155a      | 8.66E-07 | 1.47 | up   | 1.41     | up   | 1.69   | up   | 1.65     | down | USP18                |
| 8074606a      | 1.21E-07 | 1.49 | up   | 1.48     | up   | 1.78   | up   | 2.34     | down | USP18;USP41          |
| 7952249a      | 8.38E-05 | 1.62 | down | 1.41     | down | 1.58   | down | 1.14     | up   | USP2                 |
| 8067903a      | 2.29E-10 | 1.34 | up   | 1.87     | down | 1.18   | up   | 1.62     | up   | USP25                |
| 7951752a      | 3.14E-07 | 1.17 | down | 1.53     | up   | 1.13   | down | 1.27     | down | USP28                |
| 8000244a      | 1.01E-06 | 1.32 | up   | 1.15     | up   | 1.25   | up   | 1.03     | up   | USP31                |
| 8017212a      | 6.29E-05 | 1.14 | up   | 1.17     | down | 1.11   | up   | 1.09     | down | USP32                |
| 8058940a      | 3.87E-06 | 1.10 | up   | 1.09     | up   | 1.24   | up   | 1.19     | down | USP37                |
| 8043218a      | 2.30E-07 | 1.21 | up   | 1.28     | up   | 1.24   | up   | 1.09     | down | USP39                |
| 8087380a      | 1.29E-05 | 1.15 | up   | 1.39     | down | 1.02   | down | 1.49     | up   | USP4                 |
| 8131387a      | 2.65E-06 | 1.07 | up   | 1.34     | up   | 1.19   | up   | 1.06     | down | USP42                |
| 7938448a      | 8.97E-05 | 1.17 | up   | 1.32     | up   | 1.05   | up   | 1.10     | down | USP47                |
| 7999326a      | 1.05E-06 | 1.43 | up   | 1.43     | up   | 1.14   | up   | 1.35     | down | USP7                 |
| 8166826a      | 5.51E-10 | 1.30 | down | 1.63     | down | 1.52   | down | 1.54     | up   | USP9X                |
| 8176578a      | 7.44E-09 | 2.24 | down | 7.84     | down | 1.44   | up   | 12.17    | up   | USP9Y                |
| 7968333a      | 5.88E-06 | 1.04 | down | 1.39     | down | 1.40   | down | 1.28     | up   | USPL1                |
| 7900201a      | 9.86E-06 | 1.04 | up   | 1.22     | up   | 1.23   | down | 1.10     | down | UTP11L               |
| 8169868a      | 6.65E-05 | 1.35 | up   | 1.02     | up   | 1.06   | up   | 1.25     | down | UTP14A               |
| 8147994a      | 3.92E-05 | 1.30 | up   | 1.28     | down | 1.31   | up   | 1.08     | down | UTP23                |
| 8014081a      | 1.40E-06 | 1.07 | down | 1.44     | up   | 1.11   | down | 1.61     | down | UTP6                 |
| 8122464a      | 2.70E-05 | 1.09 | down | 1.64     | down | 1.17   | up   | 1.13     | up   | UTRN                 |
| 8177137a      | 1.07E-08 | 2.05 | down | 6.17     | down | 2.16   | up   | 16.06    | up   | UTY                  |
| 8054395a      | 4.95E-05 | 1.24 | up   | 1.05     | down | 1.12   | up   | 1.13     | up   | UXS1                 |
| 8002421a      | 1.35E-05 | 1.35 | up   | 1.15     | down | 1.35   | up   | 1.35     | up   | VAC14                |
| 7960544a      | 1.58E-05 | 1.56 | up   | 1.05     | up   | 1.53   | up   | 1.09     | up   | VAMP1;TAPBPL         |
| 7897370a      | 2.50E-06 | 1.08 | up   | 1.15     | up   | 1.01   | down | 1.10     | down | VAMP3                |
| 8043203a      | 7.59E-05 | 1.45 | up   | 1.21     | up   | 1.56   | up   | 1.26     | down | VAMP5                |
| 8176962a      | 8.24E-09 | 1.20 | down | 1.57     | down | 1.37   | down | 1.08     | up   | VAMP7                |
| 8043197a      | 9.27E-05 | 1.28 | up   | 1.36     | down | 1.01   | up   | 2.81     | down | VAMP8                |
| 7992967a      | 7.00E-10 | 1.14 | up   | 1.70     | down | 1.18   | down | 1.71     | up   | VASN                 |
| 8171013a      | 2.12E-07 | 1.33 | down | 1.63     | down | 1.58   | down | 1.03     | down | VBP1                 |
| 8165881a      | 9.43E-05 | 1.37 | up   | 1.04     | up   | 1.24   | up   | 1.09     | down | VCX;VCX3A/B;VCX2;VCY |
| 8042335a      | 4.34E-09 | 1.14 | down | 1.28     | up   | 1.15   | down | 1.16     | down | VDAC2;LOC729317      |
| 7962689a      | 5.72E-08 | 1.62 | up   | 1.54     | down | 1.51   | up   | 1.99     | up   | VDR                  |
| 8041467a      | 4.70E-05 | 1.47 | up   | 1.12     | down | 2.85   | up   | 1.05     | down | VIT                  |
| 8154100a      | 4.19E-09 | 2.57 | down | 1.66     | down | 3.22   | down | 1.87     | up   | VLDLR                |
| 8170479a      | 9.15E-08 | 1.26 | down | 1.46     | down | 1.35   | down | 1.37     | up   | VMA21                |
| 8139712a      | 7.03E-06 | 1.27 | up   | 1.11     | down | 1.20   | up   | 1.22     | up   | VOPP1                |
| 8155946a      | 1.90E-05 | 1.42 | down | 1.29     | up   | 1.31   | down | 1.71     | down | VPS13A               |
| 7982845a      | 5.95E-06 | 1.29 | up   | 1.14     | down | 1.27   | up   | 1.15     | down | VPS18                |
| 7945275a      | 1.78E-05 | 1.07 | down | 1.37     | down | 1.01   | up   | 1.02     | up   | VPS26B               |
| 8153776a      | 2.74E-08 | 1.21 | down | 1.61     | down | 1.25   | down | 1.50     | up   | VPS28                |
| 7991427a      | 6.80E-05 | 1.10 | up   | 1.17     | down | 1.19   | up   | 1.22     | down | VPS33B               |
| 8001149a      | 3.25E-06 | 1.01 | up   | 1.20     | down | 1.09   | up   | 1.38     | up   | VPS35                |
| 7971820a      | 9.19E-09 | 1.18 | down | 1.51     | down | 1.40   | down | 1.40     | up   | VPS36                |
| 7905099a      | 1.47E-05 | 1.06 | down | 1.24     | down | 1.14   | down | 1.24     | up   | VPS45                |
| 8180123a      | 2.52E-06 | 1.26 | up   | 1.09     | down | 1.33   | up   | 1.09     | up   | VPS52                |
| 8042107a      | 1.82E-07 | 1.01 | up   | 1.40     | up   | 1.04   | down | 1.07     | down | VRK2                 |
| 8062427a      | 2.66E-06 | 1.13 | up   | 1.33     | down | 1.04   | down | 1.34     | up   | VSTM2L               |
| 8138277a      | 1.49E-06 | 3.03 | up   | 1.68     | up   | 1.28   | up   | 1.01     | down | VWDE                 |

| Transcript ID | Arsenic  |          |      | Chromium |      | Nickel   |      | Vanadium |      | Gene Symbol           |
|---------------|----------|----------|------|----------|------|----------|------|----------|------|-----------------------|
|               | p-value  | $\Delta$ | Reg  | $\Delta$ | Reg  | $\Delta$ | Reg  | $\Delta$ | Reg  |                       |
| 7934812a      | 1.18E-07 | 1.12     | down | 1.20     | up   | 1.19     | down | 1.28     | down | WAPAL                 |
| 7914094a      | 1.56E-05 | 1.07     | down | 1.44     | up   | 1.04     | up   | 1.12     | down | WASF2                 |
| 8053599a      | 1.95E-06 | 1.37     | up   | 1.01     | down | 1.53     | up   | 1.05     | up   | WBP1;INO80B;LOC729859 |
| 8169022a      | 1.59E-06 | 1.24     | up   | 1.68     | down | 1.15     | down | 1.04     | down | WBP5                  |
| 8059361a      | 1.67E-05 | 1.20     | up   | 1.08     | down | 1.26     | up   | 1.16     | up   | WDFY1                 |
| 7969204a      | 5.92E-07 | 1.04     | up   | 1.39     | down | 1.16     | down | 1.39     | up   | WDFY2                 |
| 8101511a      | 7.05E-06 | 1.08     | up   | 1.50     | down | 1.06     | up   | 1.07     | up   | WDFY3                 |
| 8167322a      | 3.09E-06 | 1.30     | up   | 1.19     | down | 1.22     | up   | 1.08     | down | WDR13                 |
| 8098379a      | 5.35E-07 | 2.11     | up   | 2.40     | up   | 1.32     | up   | 3.87     | down | WDR17                 |
| 7904364a      | 3.17E-05 | 1.12     | up   | 1.42     | up   | 1.21     | down | 1.24     | down | WDR3                  |
| 8163491a      | 1.92E-05 | 1.07     | down | 1.49     | up   | 1.06     | up   | 1.44     | down | WDR31                 |
| 8107282a      | 1.30E-05 | 1.08     | down | 1.20     | up   | 1.13     | down | 1.36     | down | WDR36                 |
| 7925851a      | 5.73E-05 | 1.06     | down | 1.07     | down | 1.33     | down | 1.08     | up   | WDR37                 |
| 8070615a      | 1.09E-05 | 1.10     | up   | 1.51     | up   | 1.02     | down | 1.31     | down | WDR4                  |
| 8112746a      | 5.15E-08 | 1.13     | down | 1.66     | down | 1.13     | up   | 1.79     | up   | WDR41                 |
| 8178939a      | 1.50E-05 | 1.27     | up   | 1.27     | up   | 1.26     | up   | 1.03     | up   | WDR46                 |
| 8159111a      | 1.21E-06 | 1.06     | down | 1.41     | up   | 1.09     | up   | 1.42     | down | WDR5                  |
| 7959330a      | 9.59E-07 | 1.04     | down | 1.72     | up   | 1.82     | down | 1.07     | up   | WDR66                 |
| 8148158a      | 2.48E-07 | 1.01     | up   | 1.02     | down | 1.25     | up   | 1.40     | down | WDR67                 |
| 8021312a      | 7.86E-06 | 1.29     | up   | 1.72     | down | 1.14     | up   | 1.27     | up   | WDR7                  |
| 8104998a      | 7.89E-05 | 1.02     | up   | 1.50     | up   | 1.13     | up   | 1.31     | down | WDR70                 |
| 7991126a      | 1.05E-07 | 1.16     | up   | 1.00     | up   | 1.16     | up   | 1.51     | down | WDR73                 |
| 7948881a      | 4.20E-06 | 1.06     | down | 1.34     | up   | 1.27     | down | 1.32     | down | WDR74                 |
| 7983306a      | 7.51E-05 | 1.06     | down | 1.08     | down | 1.13     | up   | 1.28     | down | WDR76                 |
| 7918517a      | 2.91E-07 | 1.15     | up   | 1.35     | up   | 1.12     | down | 1.26     | down | WDR77                 |
| 7911839a      | 1.79E-05 | 1.00     | down | 1.37     | up   | 1.08     | up   | 1.20     | down | WDR8                  |
| 8165610a      | 1.31E-06 | 1.04     | down | 1.36     | up   | 1.02     | up   | 1.40     | down | WDR85                 |
| 8056047a      | 3.23E-06 | 1.36     | up   | 1.27     | up   | 1.40     | up   | 1.16     | down | WDSUB1                |
| 8148198a      | 9.32E-06 | 1.36     | up   | 1.08     | down | 1.53     | up   | 1.03     | down | WDYHV1                |
| 7986687a      | 1.73E-05 | 1.08     | up   | 1.10     | down | 1.46     | up   | 1.50     | down | WHAMML1;WHAMML2       |
| 8017850a      | 1.31E-08 | 1.48     | up   | 1.36     | down | 1.51     | up   | 1.04     | up   | WIPI1                 |
| 8131303a      | 3.05E-07 | 1.13     | up   | 1.27     | up   | 1.23     | up   | 1.15     | down | WIPI2                 |
| 8007363a      | 2.94E-08 | 1.47     | up   | 1.32     | up   | 1.55     | up   | 1.97     | down | WNK4                  |
| 8016311a      | 3.78E-05 | 1.11     | down | 1.23     | up   | 1.05     | down | 1.44     | down | WNT3                  |
| 8004556a      | 3.33E-08 | 1.17     | up   | 1.24     | up   | 1.16     | up   | 1.34     | down | WRAP53                |
| 8116595a      | 6.93E-07 | 1.36     | up   | 1.20     | up   | 1.32     | up   | 1.11     | up   | WRNIP1                |
| 7966829a      | 6.95E-08 | 1.04     | down | 1.27     | down | 1.05     | up   | 1.59     | up   | WSB2                  |
| 7947363a      | 1.33E-10 | 1.09     | up   | 1.21     | up   | 1.25     | up   | 2.97     | down | WT1                   |
| 8123129a      | 7.72E-05 | 1.36     | down | 1.02     | down | 1.23     | down | 1.09     | down | WTAP                  |
| 8126952a      | 6.61E-08 | 1.93     | down | 1.08     | down | 1.75     | down | 1.12     | down | WTAP                  |
| 8109773a      | 2.53E-05 | 1.22     | down | 1.08     | down | 1.59     | down | 1.17     | up   | WWC1                  |
| 8004184a      | 1.30E-07 | 1.47     | up   | 1.05     | up   | 2.09     | up   | 2.33     | down | XAF1                  |
| 8149307a      | 4.34E-09 | 1.64     | down | 1.14     | down | 1.46     | down | 1.06     | up   | XKR6                  |
| 7936284a      | 1.04E-08 | 1.19     | down | 1.21     | down | 1.27     | down | 1.53     | up   | XPNPEP1               |
| 8000482a      | 1.93E-06 | 1.36     | up   | 1.15     | up   | 1.14     | up   | 1.02     | up   | XPO6                  |
| 7956785a      | 6.05E-07 | 1.07     | down | 1.38     | up   | 1.06     | down | 1.10     | down | XPOT                  |
| 8106730a      | 1.28E-05 | 1.03     | down | 1.24     | down | 1.03     | up   | 1.79     | up   | XRCC4                 |
| 8048146a      | 1.88E-05 | 1.08     | up   | 1.04     | up   | 1.05     | up   | 1.11     | down | XRCC5                 |
| 8091141a      | 1.42E-06 | 1.05     | down | 1.28     | up   | 1.16     | up   | 1.55     | down | XRN1                  |
| 8061324a      | 3.08E-08 | 1.91     | down | 1.15     | up   | 2.22     | down | 1.11     | down | XRN2                  |
| 7943398a      | 8.76E-05 | 1.03     | down | 1.26     | up   | 1.08     | down | 1.02     | down | YAP1                  |
| 7914563a      | 1.94E-08 | 1.06     | down | 1.44     | up   | 1.20     | down | 1.03     | up   | YARS                  |
| 8074773a      | 1.27E-07 | 1.51     | up   | 1.37     | up   | 1.15     | up   | 1.21     | down | YDJC                  |

| Transcript ID | p-value  | Arsenic  |      | Chromium |      | Nickel   |      | Vanadium |      | Gene Symbol     |
|---------------|----------|----------|------|----------|------|----------|------|----------|------|-----------------|
|               |          | $\Delta$ | Reg  | $\Delta$ | Reg  | $\Delta$ | Reg  | $\Delta$ | Reg  |                 |
| 8021984a      | 2.52E-05 | 1.03     | down | 1.19     | up   | 1.12     | down | 1.39     | down | YES1            |
| 8168018a      | 1.90E-06 | 1.16     | up   | 1.27     | down | 1.01     | down | 1.50     | down | YIPF6           |
| 8074780a      | 7.61E-06 | 1.22     | down | 1.07     | up   | 1.45     | up   | 1.78     | down | YPEL1           |
| 7915084a      | 4.17E-05 | 1.34     | up   | 1.22     | up   | 1.25     | up   | 1.01     | down | YRDC;C1orf122   |
| 8055361a      | 4.37E-05 | 1.08     | up   | 1.12     | down | 1.01     | down | 1.13     | up   | YSK4            |
| 8055476a      | 5.75E-05 | 1.00     | down | 1.13     | up   | 1.04     | down | 1.09     | down | YWHAE           |
| 8140398a      | 8.79E-05 | 1.16     | up   | 1.21     | up   | 1.06     | up   | 1.16     | down | YWHAG           |
| 8050215a      | 1.36E-07 | 1.08     | up   | 1.16     | down | 1.09     | up   | 1.16     | up   | YWHAQ;LOC392510 |
| 8177029a      | 3.03E-05 | 1.15     | up   | 1.07     | up   | 1.39     | up   | 1.17     | down | ZBED1;DHRSX     |
| 8147040a      | 6.53E-08 | 1.14     | up   | 1.20     | down | 1.13     | up   | 2.66     | down | ZBTB10          |
| 8089701a      | 5.55E-07 | 3.17     | up   | 1.73     | down | 1.69     | up   | 2.63     | down | ZBTB20          |
| 8164002a      | 1.95E-06 | 1.50     | down | 1.10     | up   | 1.26     | down | 1.19     | down | ZBTB26          |
| 8157933a      | 1.44E-05 | 1.00     | down | 1.40     | up   | 1.02     | up   | 1.49     | down | ZBTB43          |
| 7952739a      | 1.88E-08 | 1.04     | down | 1.22     | down | 1.16     | up   | 1.59     | down | ZBTB44          |
| 8079099a      | 1.91E-06 | 1.20     | down | 1.19     | down | 1.29     | down | 1.13     | up   | ZBTB47          |
| 8118721a      | 5.02E-08 | 1.50     | up   | 1.04     | up   | 1.50     | up   | 1.09     | up   | ZBTB9           |
| 7908978a      | 3.94E-05 | 1.38     | down | 1.38     | down | 1.44     | down | 1.13     | up   | ZC3H11A         |
| 7900146a      | 5.97E-06 | 1.09     | up   | 1.22     | down | 1.17     | up   | 1.22     | down | ZC3H12A         |
| 8167957a      | 3.37E-05 | 1.04     | up   | 1.25     | up   | 1.04     | up   | 1.82     | down | ZC3H12B         |
| 8046848a      | 2.13E-07 | 1.27     | up   | 1.22     | up   | 1.17     | up   | 1.27     | down | ZC3H15          |
| 7997779a      | 1.05E-06 | 1.36     | up   | 1.41     | up   | 1.52     | up   | 1.24     | down | ZC3H18          |
| 8143279a      | 1.89E-06 | 1.25     | up   | 1.45     | up   | 1.16     | up   | 1.20     | down | ZC3HAV1         |
| 8142899a      | 2.22E-05 | 1.24     | up   | 1.02     | down | 1.16     | up   | 1.14     | down | ZC3HC1          |
| 8173261a      | 1.45E-09 | 3.49     | down | 1.49     | down | 3.16     | down | 7.00     | down | ZC4H2           |
| 7916185a      | 9.32E-05 | 1.06     | down | 1.20     | up   | 1.10     | down | 1.26     | down | ZCCHC11         |
| 8003263a      | 3.25E-08 | 1.34     | up   | 1.35     | up   | 1.68     | up   | 1.64     | down | ZCCHC14         |
| 8021546a      | 1.72E-05 | 1.27     | up   | 1.37     | down | 1.01     | down | 1.15     | up   | ZCCHC2;C18orf49 |
| 7934690a      | 2.61E-06 | 1.10     | down | 1.09     | down | 1.30     | down | 1.41     | up   | ZCCHC24         |
| 8106702a      | 9.18E-05 | 1.13     | up   | 1.23     | down | 1.24     | up   | 1.46     | up   | ZCCHC9          |
| 7962367a      | 4.71E-05 | 1.06     | up   | 1.10     | down | 1.27     | up   | 1.10     | down | ZCRB1           |
| 7929634a      | 1.46E-05 | 1.13     | down | 1.18     | up   | 1.16     | down | 1.14     | down | ZDHHC16         |
| 7899253a      | 8.18E-07 | 1.08     | down | 1.34     | up   | 1.08     | down | 1.23     | down | ZDHHC18         |
| 8144758a      | 1.27E-06 | 1.34     | up   | 1.53     | down | 1.40     | up   | 1.15     | down | ZDHHC2          |
| 8160151a      | 2.85E-07 | 1.20     | down | 1.23     | up   | 1.61     | down | 1.92     | down | ZDHHC21         |
| 7949645a      | 1.29E-05 | 1.25     | up   | 1.19     | up   | 1.26     | up   | 1.08     | down | ZDHHC24         |
| 8131414a      | 4.13E-05 | 1.09     | up   | 1.21     | down | 1.21     | up   | 1.07     | up   | ZDHHC4          |
| 7926916a      | 9.44E-09 | 1.67     | down | 3.22     | down | 1.96     | down | 1.31     | up   | ZEB1            |
| 8055624a      | 1.63E-05 | 1.40     | up   | 1.19     | up   | 1.11     | up   | 1.30     | down | ZEB2            |
| 8164464a      | 6.24E-05 | 1.06     | up   | 1.20     | up   | 1.22     | up   | 1.49     | down | ZER1            |
| 8151561a      | 3.17E-07 | 1.01     | down | 1.38     | up   | 1.12     | up   | 1.88     | down | ZFAND1          |
| 8048478a      | 2.14E-05 | 1.11     | up   | 1.15     | down | 1.23     | up   | 1.05     | up   | ZFAND2B         |
| 7978059a      | 2.84E-05 | 1.06     | up   | 1.41     | up   | 1.06     | up   | 1.05     | down | ZFHX2           |
| 8002692a      | 1.34E-06 | 1.05     | down | 1.41     | down | 1.09     | down | 1.55     | up   | ZFHX3           |
| 8147000a      | 2.48E-05 | 1.50     | down | 2.38     | down | 1.86     | down | 1.32     | up   | ZFHX4           |
| 7997257a      | 6.79E-05 | 1.13     | up   | 1.41     | down | 1.09     | up   | 1.38     | up   | ZFP1            |
| 8051814a      | 6.24E-07 | 1.43     | up   | 1.12     | down | 1.35     | up   | 1.21     | down | ZFP36L2         |
| 8163444a      | 2.71E-06 | 1.45     | down | 1.35     | up   | 1.39     | down | 1.43     | down | ZFP37           |
| 8067094a      | 1.77E-05 | 1.28     | up   | 1.24     | up   | 1.49     | up   | 1.14     | down | ZFP64           |
| 7996807a      | 1.95E-06 | 1.15     | down | 1.21     | down | 1.12     | down | 2.04     | up   | ZFP90           |
| 8111360a      | 1.84E-07 | 1.31     | up   | 1.24     | up   | 1.29     | up   | 1.16     | down | ZFR             |
| 8166500a      | 1.19E-06 | 1.13     | up   | 1.47     | up   | 1.06     | down | 1.13     | down | ZFX             |
| 8176384a      | 1.16E-08 | 1.78     | down | 8.28     | down | 2.25     | up   | 11.34    | up   | ZFY             |
| 8106602a      | 1.12E-05 | 1.22     | down | 1.46     | down | 1.03     | down | 1.42     | up   | ZFYVE16         |

| Transcript ID | Arsenic  |      |      | Chromium |      | Nickel |      | Vanadium |      | Gene Symbol             |
|---------------|----------|------|------|----------|------|--------|------|----------|------|-------------------------|
|               | p-value  | Δ    | Reg  | Δ        | Reg  | Δ      | Reg  | Δ        | Reg  |                         |
| 7982812a      | 2.76E-06 | 1.09 | up   | 1.29     | down | 1.27   | up   | 1.23     | down | ZFYVE19                 |
| 7901426a      | 2.71E-09 | 1.02 | down | 1.66     | up   | 1.51   | down | 1.34     | down | ZFYVE9                  |
| 7992732a      | 1.93E-06 | 1.24 | up   | 1.29     | down | 1.53   | up   | 1.14     | up   | ZG16B                   |
| 8066279a      | 2.89E-05 | 1.07 | down | 1.24     | down | 1.12   | down | 1.46     | up   | ZHX3                    |
| 7969830a      | 4.87E-09 | 1.05 | down | 1.14     | up   | 1.54   | up   | 1.20     | down | ZIC2                    |
| 8000399a      | 6.50E-07 | 1.66 | up   | 1.11     | up   | 1.43   | up   | 1.00     | down | ZKSCAN2                 |
| 8124553a      | 1.29E-06 | 1.37 | up   | 1.02     | up   | 1.31   | up   | 1.25     | up   | ZKSCAN4                 |
| 7928558a      | 2.07E-06 | 1.50 | down | 1.36     | down | 1.46   | down | 1.33     | up   | ZMIZ1                   |
| 7899943a      | 3.83E-08 | 1.01 | down | 1.46     | up   | 1.23   | down | 1.17     | down | ZMYM1                   |
| 8173457a      | 7.45E-06 | 1.24 | up   | 1.26     | down | 1.03   | up   | 1.02     | down | ZMYM3                   |
| 8030002a      | 4.82E-05 | 1.32 | up   | 1.39     | up   | 1.28   | down | 1.53     | down | ZNF114                  |
| 8039771a      | 2.71E-08 | 1.22 | down | 1.42     | down | 1.44   | down | 1.57     | up   | ZNF132                  |
| 8061154a      | 6.43E-06 | 1.55 | down | 1.02     | up   | 1.64   | down | 1.06     | down | ZNF133                  |
| 8030954a      | 2.46E-06 | 1.60 | down | 1.43     | up   | 1.22   | down | 2.19     | down | ZNF137                  |
| 8133057a      | 5.02E-05 | 1.14 | down | 1.32     | up   | 1.01   | down | 1.57     | down | ZNF138                  |
| 8058973a      | 4.15E-07 | 1.22 | up   | 1.35     | up   | 1.26   | up   | 1.15     | down | ZNF142;BCS1L            |
| 8028186a      | 4.18E-05 | 1.41 | down | 1.01     | up   | 1.60   | down | 1.15     | down | ZNF146                  |
| 8039674a      | 3.32E-07 | 1.92 | down | 1.06     | up   | 1.92   | down | 1.05     | down | ZNF154                  |
| 8124502a      | 5.67E-06 | 1.25 | up   | 1.18     | down | 1.56   | up   | 1.24     | up   | ZNF184                  |
| 7952361a      | 4.47E-05 | 1.08 | down | 1.19     | down | 1.04   | up   | 1.29     | down | ZNF202                  |
| 8124498a      | 4.19E-05 | 1.36 | up   | 1.15     | down | 2.38   | up   | 1.14     | down | ZNF204                  |
| 7933209a      | 2.41E-05 | 1.25 | down | 1.14     | up   | 1.45   | down | 1.17     | down | ZNF22;RASSF4;C10orf25   |
| 7933180a      | 4.81E-08 | 1.83 | down | 1.20     | down | 2.01   | down | 1.88     | up   | ZNF239                  |
| 8022882a      | 1.02E-05 | 1.00 | up   | 1.30     | up   | 1.06   | up   | 1.47     | down | ZNF24                   |
| 8153920a      | 3.32E-08 | 1.65 | down | 1.40     | down | 1.23   | down | 1.40     | up   | ZNF250                  |
| 8153890a      | 4.58E-07 | 1.14 | down | 1.25     | down | 1.20   | down | 1.43     | up   | ZNF251                  |
| 8153935a      | 4.57E-06 | 1.64 | down | 1.79     | down | 1.42   | down | 1.33     | up   | ZNF252                  |
| 8027241a      | 3.11E-08 | 1.07 | down | 1.89     | up   | 1.83   | up   | 5.01     | down | ZNF253;ZNF93            |
| 7951838a      | 6.72E-05 | 1.10 | up   | 1.53     | up   | 1.02   | up   | 1.16     | down | ZNF259                  |
| 7995258a      | 1.13E-05 | 1.56 | up   | 1.13     | down | 1.43   | up   | 1.02     | up   | ZNF267                  |
| 8133062a      | 6.56E-06 | 1.07 | down | 1.31     | up   | 1.09   | up   | 1.55     | down | ZNF273                  |
| 8074845a      | 7.16E-11 | 2.23 | up   | 1.90     | down | 2.53   | up   | 5.49     | up   | ZNF280B                 |
| 8029368a      | 7.66E-05 | 1.28 | down | 1.22     | up   | 1.35   | down | 1.10     | up   | ZNF284                  |
| 8005110a      | 5.86E-08 | 1.10 | up   | 1.38     | up   | 1.10   | down | 1.50     | down | ZNF286A;ZNF286B;TBC1D26 |
| 8013305a      | 2.60E-07 | 1.08 | down | 1.41     | up   | 1.18   | down | 1.61     | down | ZNF286A;ZNF286B;TBC1D26 |
| 8013026a      | 5.14E-06 | 1.75 | down | 1.06     | up   | 1.52   | down | 1.12     | down | ZNF287                  |
| 8115196a      | 4.21E-09 | 1.23 | up   | 8.33     | down | 1.01   | up   | 10.36    | up   | ZNF300                  |
| 8178275a      | 3.32E-05 | 1.10 | down | 1.16     | down | 1.28   | down | 1.69     | up   | ZNF311                  |
| 7933186a      | 3.43E-06 | 1.08 | down | 2.28     | down | 1.10   | up   | 1.44     | up   | ZNF32                   |
| 8039006a      | 1.30E-07 | 1.72 | down | 1.88     | up   | 1.53   | down | 3.85     | down | ZNF320                  |
| 8039013a      | 9.39E-06 | 1.14 | down | 1.35     | up   | 1.02   | down | 1.53     | down | ZNF321                  |
| 8031949a      | 3.25E-07 | 1.24 | down | 1.20     | up   | 1.20   | down | 1.16     | down | ZNF324B;ZNF584          |
| 8039740a      | 1.19E-05 | 1.14 | down | 1.25     | up   | 1.07   | down | 1.41     | down | ZNF329                  |
| 8066745a      | 6.32E-05 | 1.34 | down | 1.61     | down | 1.74   | down | 1.42     | up   | ZNF334                  |
| 7927062a      | 2.71E-05 | 1.89 | down | 1.49     | down | 1.47   | down | 1.24     | up   | ZNF33A                  |
| 8153896a      | 6.19E-10 | 1.12 | down | 1.27     | down | 1.16   | down | 1.90     | up   | ZNF34                   |
| 8064514a      | 8.44E-08 | 1.71 | down | 1.49     | up   | 2.03   | down | 1.11     | down | ZNF343                  |
| 8110253a      | 3.09E-05 | 1.05 | up   | 1.33     | up   | 1.04   | up   | 1.27     | down | ZNF346                  |
| 8039054a      | 2.34E-11 | 1.37 | down | 2.74     | up   | 1.34   | down | 4.47     | down | ZNF347                  |
| 7927747a      | 4.21E-06 | 1.09 | up   | 1.38     | down | 1.20   | down | 1.50     | up   | ZNF365                  |
| 8162601a      | 2.66E-05 | 1.32 | down | 1.14     | up   | 1.09   | down | 1.35     | down | ZNF367                  |
| 7933129a      | 7.33E-05 | 1.39 | down | 1.02     | up   | 1.30   | down | 1.14     | down | ZNF37B                  |
| 7963774a      | 1.52E-07 | 1.39 | up   | 1.05     | up   | 1.74   | up   | 1.75     | up   | ZNF385A                 |

| Transcript ID | p-value  | Arsenic |      | Chromium |      | Nickel |      | Vanadium |      | Gene Symbol         |
|---------------|----------|---------|------|----------|------|--------|------|----------|------|---------------------|
|               |          | Δ       | Reg  | Δ        | Reg  | Δ      | Reg  | Δ        | Reg  |                     |
| 8172307a      | 4.89E-05 | 1.18    | up   | 1.12     | down | 1.08   | up   | 1.23     | down | ZNF41               |
| 8037355a      | 2.27E-06 | 1.16    | down | 1.55     | down | 1.15   | down | 1.07     | up   | ZNF428              |
| 8035813a      | 5.08E-07 | 1.32    | up   | 2.75     | up   | 2.77   | up   | 5.14     | down | ZNF43               |
| 8034393a      | 7.89E-05 | 1.22    | down | 1.66     | down | 1.66   | up   | 1.18     | down | ZNF443              |
| 8031669a      | 4.63E-07 | 1.49    | down | 1.23     | up   | 1.61   | down | 1.94     | down | ZNF470              |
| 8139800a      | 4.15E-07 | 1.13    | down | 1.13     | up   | 3.17   | up   | 1.02     | up   | ZNF479;LOC643955    |
| 8157193a      | 3.40E-09 | 1.50    | down | 1.79     | up   | 1.13   | down | 1.82     | down | ZNF483              |
| 7927173a      | 5.71E-07 | 1.87    | down | 1.06     | down | 1.86   | down | 1.17     | up   | ZNF485              |
| 8027260a      | 4.73E-05 | 1.66    | up   | 1.76     | down | 2.73   | up   | 4.70     | down | ZNF486;ZNF93        |
| 7927383a      | 5.62E-05 | 1.25    | up   | 1.11     | up   | 1.46   | up   | 1.25     | down | ZNF488              |
| 8027345a      | 1.15E-05 | 1.32    | up   | 1.92     | up   | 1.88   | up   | 2.88     | down | ZNF492              |
| 8134644a      | 9.12E-05 | 1.16    | up   | 1.19     | up   | 1.14   | up   | 1.06     | down | ZNF498              |
| 7934553a      | 4.27E-05 | 1.24    | down | 1.41     | up   | 1.07   | down | 1.08     | down | ZNF503;C10orf41     |
| 8035773a      | 3.07E-07 | 2.72    | up   | 4.40     | up   | 4.18   | up   | 9.76     | down | ZNF506              |
| 8162631a      | 3.48E-06 | 1.04    | down | 1.38     | up   | 1.09   | down | 1.76     | down | ZNF510              |
| 8051113a      | 1.76E-05 | 1.23    | up   | 1.06     | down | 1.13   | up   | 1.04     | up   | ZNF513              |
| 8053775a      | 8.51E-06 | 1.25    | up   | 1.27     | down | 1.32   | up   | 1.13     | up   | ZNF514              |
| 8023882a      | 2.95E-09 | 1.23    | up   | 2.13     | down | 1.14   | up   | 1.19     | up   | ZNF516              |
| 7929562a      | 1.53E-07 | 1.48    | down | 1.63     | down | 1.92   | down | 1.18     | up   | ZNF518A             |
| 8099364a      | 1.06E-07 | 2.13    | down | 3.20     | up   | 2.23   | down | 2.53     | down | ZNF518B             |
| 8030931a      | 6.58E-07 | 1.05    | down | 1.89     | up   | 1.43   | up   | 2.46     | down | ZNF528              |
| 8031632a      | 3.27E-08 | 1.62    | up   | 1.78     | up   | 3.55   | up   | 11.51    | down | ZNF542;LOC283788    |
| 8031720a      | 5.32E-05 | 1.45    | down | 1.31     | up   | 1.26   | down | 1.16     | down | ZNF543              |
| 8031884a      | 7.11E-05 | 1.09    | down | 1.26     | up   | 1.07   | down | 1.48     | down | ZNF544              |
| 8039655a      | 2.14E-05 | 1.30    | down | 1.15     | up   | 1.23   | down | 1.15     | down | ZNF550              |
| 8024527a      | 4.67E-08 | 1.09    | up   | 2.00     | up   | 1.37   | up   | 1.82     | down | ZNF556              |
| 8033801a      | 8.44E-07 | 1.36    | down | 1.15     | up   | 1.43   | down | 1.20     | down | ZNF562              |
| 8148276a      | 2.60E-08 | 1.67    | up   | 1.94     | up   | 1.56   | up   | 2.24     | down | ZNF572              |
| 8039586a      | 8.07E-05 | 1.13    | up   | 1.38     | down | 1.47   | up   | 1.11     | up   | ZNF582              |
| 8031939a      | 2.33E-05 | 1.10    | down | 1.37     | up   | 1.18   | down | 1.07     | down | ZNF584              |
| 8036373a      | 7.05E-06 | 1.61    | down | 1.06     | down | 1.73   | down | 1.29     | down | ZNF585A             |
| 7985605a      | 1.78E-05 | 1.20    | up   | 1.40     | down | 1.21   | up   | 1.09     | down | ZNF592              |
| 7899096a      | 9.18E-06 | 1.39    | up   | 1.22     | up   | 1.07   | up   | 1.05     | down | ZNF593              |
| 8039719a      | 6.38E-05 | 1.04    | down | 1.33     | up   | 1.04   | up   | 1.15     | down | ZNF606;LOC100128398 |
| 8113761a      | 1.25E-08 | 2.00    | down | 2.36     | down | 1.86   | down | 2.74     | up   | ZNF608              |
| 7984203a      | 6.96E-06 | 1.05    | up   | 1.38     | down | 1.04   | up   | 1.26     | down | ZNF609              |
| 8030914a      | 4.14E-06 | 1.36    | down | 1.18     | up   | 1.57   | down | 1.20     | down | ZNF610              |
| 8111129a      | 1.38E-06 | 1.60    | up   | 1.47     | up   | 1.43   | up   | 1.16     | down | ZNF622              |
| 8148658a      | 3.17E-08 | 1.52    | down | 1.39     | down | 1.28   | down | 1.78     | up   | ZNF623              |
| 8172379a      | 4.40E-05 | 1.20    | up   | 1.13     | down | 1.37   | up   | 1.07     | down | ZNF630              |
| 7962794a      | 1.43E-05 | 1.33    | up   | 1.23     | down | 1.18   | up   | 1.81     | down | ZNF641              |
| 7900438a      | 2.07E-05 | 1.24    | down | 1.42     | down | 1.31   | down | 1.48     | up   | ZNF643              |
| 7995033a      | 4.28E-07 | 1.37    | up   | 1.17     | up   | 1.35   | up   | 1.12     | up   | ZNF646              |
| 8079198a      | 7.10E-06 | 2.08    | down | 1.31     | down | 3.42   | down | 1.47     | down | ZNF660;ZNF197       |
| 7959751a      | 1.73E-05 | 1.16    | down | 1.16     | up   | 1.03   | down | 1.17     | down | ZNF664              |
| 8000974a      | 7.64E-05 | 1.30    | up   | 1.08     | up   | 1.09   | up   | 1.20     | up   | ZNF668              |
| 8039680a      | 8.78E-07 | 1.33    | down | 1.66     | up   | 1.14   | down | 1.73     | down | ZNF671              |
| 8172274a      | 2.68E-05 | 1.16    | up   | 1.46     | down | 1.26   | up   | 1.03     | up   | ZNF674              |
| 8039070a      | 2.08E-07 | 1.13    | down | 1.53     | up   | 1.15   | up   | 2.39     | down | ZNF677              |
| 8133042a      | 2.05E-07 | 1.01    | down | 1.02     | down | 3.15   | up   | 1.09     | down | ZNF679              |
| 8000910a      | 2.31E-07 | 1.33    | up   | 1.04     | down | 1.17   | up   | 1.15     | up   | ZNF688              |
| 8000924a      | 1.48E-06 | 1.31    | up   | 1.11     | up   | 1.28   | up   | 1.06     | up   | ZNF689              |
| 8025968a      | 1.58E-06 | 1.14    | down | 1.28     | up   | 1.08   | up   | 1.45     | down | ZNF69               |

| Transcript ID | p-value  | Arsenic |      | Chromium |      | Nickel |      | Vanadium |      | Gene Symbol           |
|---------------|----------|---------|------|----------|------|--------|------|----------|------|-----------------------|
|               |          | Δ       | Reg  | Δ        | Reg  | Δ      | Reg  | Δ        | Reg  |                       |
| 8033746a      | 1.55E-06 | 1.27    | up   | 1.45     | up   | 1.83   | up   | 1.75     | down | ZNF699                |
| 8148941a      | 2.66E-05 | 1.16    | down | 1.27     | down | 1.08   | down | 1.36     | up   | ZNF7;COMMD5           |
| 8030950a      | 8.86E-08 | 1.62    | down | 2.18     | up   | 1.36   | down | 2.32     | down | ZNF701                |
| 8039010a      | 1.29E-05 | 1.37    | down | 1.45     | up   | 1.11   | down | 1.36     | down | ZNF701/765/813/28/525 |
| 8039025a      | 1.17E-06 | 1.65    | up   | 1.85     | up   | 3.99   | up   | 2.15     | down | ZNF702P               |
| 8145829a      | 9.66E-05 | 1.04    | up   | 1.23     | down | 1.01   | up   | 1.16     | up   | ZNF703                |
| 8031675a      | 5.55E-05 | 1.16    | down | 1.23     | up   | 1.09   | down | 1.03     | up   | ZNF71                 |
| 8168589a      | 1.32E-08 | 1.21    | up   | 6.99     | up   | 1.16   | up   | 1.09     | down | ZNF711                |
| 8027285a      | 9.79E-05 | 1.12    | down | 1.30     | up   | 1.08   | up   | 1.74     | down | ZNF714                |
| 8133018a      | 2.34E-11 | 1.22    | up   | 1.17     | up   | 8.81   | up   | 1.29     | down | ZNF716                |
| 8088911a      | 6.29E-06 | 1.09    | up   | 1.84     | down | 1.51   | down | 4.59     | up   | ZNF717;LOC100287163   |
| 8027348a      | 3.74E-09 | 5.85    | up   | 4.02     | down | 7.07   | up   | 10.78    | up   | ZNF730                |
| 8098745a      | 4.48E-05 | 2.23    | down | 2.25     | up   | 1.40   | down | 1.27     | down | ZNF732                |
| 8035793a      | 6.41E-06 | 1.22    | down | 3.06     | up   | 1.00   | up   | 4.42     | down | ZNF737                |
| 8000906a      | 5.46E-05 | 1.30    | up   | 1.27     | up   | 1.25   | up   | 1.05     | up   | ZNF764                |
| 8000899a      | 5.38E-07 | 1.30    | up   | 1.24     | up   | 1.30   | up   | 1.19     | down | ZNF768                |
| 7987361a      | 8.69E-05 | 1.12    | down | 1.28     | down | 1.10   | up   | 1.60     | down | ZNF770                |
| 7997896a      | 4.12E-07 | 1.32    | up   | 1.35     | up   | 1.72   | up   | 1.33     | down | ZNF778                |
| 7997904a      | 3.43E-07 | 1.25    | up   | 1.65     | up   | 2.46   | up   | 1.47     | down | ZNF778                |
| 8036430a      | 7.17E-07 | 1.00    | up   | 1.24     | down | 1.01   | up   | 1.37     | up   | ZNF781                |
| 8025992a      | 2.34E-11 | 1.09    | down | 5.37     | up   | 1.39   | down | 11.64    | down | ZNF788                |
| 8039692a      | 2.20E-06 | 1.67    | down | 1.90     | up   | 1.33   | down | 1.70     | down | ZNF814;ZNF552;ZNF587  |
| 8002618a      | 1.30E-05 | 1.04    | up   | 1.38     | down | 1.04   | up   | 1.28     | up   | ZNF821                |
| 8035789a      | 4.82E-05 | 1.44    | down | 1.31     | up   | 1.56   | down | 1.06     | down | ZNF826                |
| 8103025a      | 9.34E-09 | 1.13    | down | 1.86     | down | 1.14   | down | 1.89     | up   | ZNF827                |
| 8025984a      | 2.25E-09 | 1.96    | down | 1.21     | up   | 1.89   | down | 2.21     | down | ZNF844                |
| 8093332a      | 1.20E-07 | 1.02    | up   | 1.69     | up   | 1.52   | up   | 4.39     | down | ZNF876P               |
| 8027254a      | 8.00E-06 | 1.40    | down | 1.57     | up   | 1.23   | down | 2.49     | down | ZNF90;ZNF93           |
| 8027247a      | 9.02E-10 | 1.13    | down | 7.70     | up   | 1.23   | up   | 13.36    | down | ZNF93                 |
| 8006627a      | 4.98E-07 | 1.26    | up   | 1.05     | up   | 1.26   | up   | 1.62     | down | ZNHIT3;MYO19          |
| 7917359a      | 3.35E-06 | 1.02    | down | 1.21     | up   | 1.37   | down | 1.01     | down | ZNHIT6                |
| 7997247a      | 1.62E-05 | 1.24    | up   | 1.29     | down | 1.40   | up   | 1.36     | up   | ZNRF1                 |
| 7916969a      | 2.64E-05 | 1.04    | down | 1.23     | up   | 1.20   | down | 1.05     | down | ZRANB2                |
| 8117640a      | 9.33E-08 | 1.46    | up   | 1.34     | up   | 1.32   | up   | 1.48     | down | ZSCAN16               |
| 8039730a      | 8.39E-08 | 1.06    | down | 1.52     | up   | 1.21   | up   | 1.43     | down | ZSCAN18               |
| 7985577a      | 1.24E-05 | 1.08    | up   | 1.21     | down | 1.14   | up   | 1.17     | down | ZSCAN2                |
| 8134689a      | 1.29E-07 | 1.22    | up   | 1.14     | up   | 1.35   | up   | 1.03     | down | ZSCAN21;ZNF3          |
| 8039577a      | 3.59E-05 | 1.10    | down | 1.42     | up   | 1.07   | up   | 1.21     | down | ZSCAN5A               |
| 8031629a      | 3.53E-07 | 1.31    | down | 1.79     | up   | 1.01   | up   | 1.17     | down | ZSCAN5C               |
| 8105506a      | 3.57E-10 | 1.61    | down | 1.47     | down | 1.45   | down | 1.56     | up   | ZSWIM6                |
| 7951734a      | 2.19E-09 | 1.19    | down | 1.43     | up   | 1.29   | down | 1.29     | down | ZW10                  |
| 7984330a      | 2.48E-05 | 1.00    | down | 1.26     | down | 1.11   | up   | 1.27     | down | ZWILCH                |
| 7901497a      | 2.34E-11 | 1.04    | down | 2.49     | up   | 1.00   | down | 1.47     | down | ZYG11A                |
| 8136918a      | 5.44E-06 | 1.04    | down | 1.19     | down | 1.28   | down | 1.21     | up   | ZYX                   |
| 8011542a      | 9.14E-05 | 1.15    | up   | 1.18     | up   | 1.05   | up   | 1.21     | down | ZZEF1                 |

Complete list of all genes meeting the one-way ANOVA criteria with a Benjamini-Hochberg corrected p-value of less than or equal to 0.0005 in at least one of the four metal-transformed clones.



Supplementary Table 2 Differentially Expressed Genes in As-Transformed Clones

| Transcript ID | p-value  | Fold Change | Reg  | Gene Symbol           |
|---------------|----------|-------------|------|-----------------------|
| 8085608a      | 2.65E-04 | 1.69        | down | HACL1                 |
| 8061324a      | 6.18E-04 | 1.91        | down | XRN2                  |
| 8065469a      | 9.32E-04 | 1.95        | down | ABHD12                |
| 7936439a      | 5.01E-03 | 2.19        | down | AFAP1L2               |
| 8056005a      | 9.86E-05 | 1.87        | up   | ACVR1                 |
| 8045587a      | 7.73E-04 | 2.84        | up   | ACVR2A                |
| 7957386a      | 2.40E-03 | 2.84        | up   | ACSS3                 |
| 7975598a      | 3.33E-03 | 1.51        | up   | ACOT1                 |
| 7975602a      | 7.37E-03 | 1.64        | up   | ACOT2                 |
| 7932214a      | 2.80E-02 | 1.60        | down | ACBD7                 |
| 8112342a      | 1.17E-02 | 2.53        | down | ADAMTS6               |
| 7985522a      | 6.63E-03 | 1.89        | down | ADAMTSL3              |
| 8034084a      | 2.99E-02 | 1.59        | up   | AP1M2                 |
| 8069178a      | 7.10E-03 | 2.12        | up   | ADARB1                |
| 8110158a      | 4.06E-03 | 1.59        | down | ARL10                 |
| 7925929a      | 1.11E-02 | 2.72        | up   | AKR1C3                |
| 8023528a      | 1.11E-02 | 1.71        | down | ALPK2                 |
| 7957452a      | 1.96E-02 | 2.77        | up   | ALX1                  |
| 8167998a      | 1.76E-02 | 2.03        | up   | AR                    |
| 8083240a      | 3.77E-03 | 3.51        | up   | AGTR1                 |
| 8095986a      | 2.44E-02 | 1.79        | down | ANXA3                 |
| 7927367a      | 1.58E-02 | 2.00        | down | ANXA8;ANXA8L1;ANXA8L2 |
| 7933312a      | 1.02E-02 | 3.23        | down | ANXA8L1;ANXA8L2       |
| 7927307a      | 1.71E-02 | 2.37        | down | ANXA8L2;ANXA8L1       |
| 7960438a      | 1.79E-04 | 3.84        | down | ANO2                  |
| 8073088a      | 1.94E-03 | 2.25        | up   | APOBEC3G              |
| 8171148a      | 5.99E-03 | 1.87        | up   | ARSD                  |
| 8115144a      | 2.17E-02 | 1.50        | down | ARSI                  |
| 8141150a      | 9.29E-03 | 1.52        | down | ASNS                  |
| 8156575a      | 1.39E-03 | 1.56        | up   | ATMIN                 |
| 8179762a      | 1.92E-03 | 1.53        | up   | ATP6V1G2;BAT1         |
| 8017885a      | 9.05E-03 | 2.16        | up   | ABCA8                 |
| 8060627a      | 6.63E-04 | 2.11        | down | ATRN                  |
| 8141206a      | 1.34E-02 | 2.33        | up   | BAIAP2L1              |
| 8046147a      | 3.08E-02 | 1.84        | up   | BBS5;KBTBD10          |
| 8068671a      | 2.44E-02 | 1.92        | down | BACE2                 |
| 8116635a      | 6.74E-04 | 1.65        | up   | BPHL;LOC100130927     |
| 7945349a      | 2.91E-05 | 1.71        | up   | BET1L                 |
| 8132250a      | 1.82E-02 | 1.52        | down | BMPER                 |
| 8035304a      | 3.29E-02 | 2.59        | up   | BST2                  |
| 7979241a      | 3.11E-02 | 2.07        | up   | BMP4                  |
| 8054945a      | 8.77E-05 | 1.63        | up   | BIN1                  |
| 8060988a      | 1.04E-04 | 2.41        | down | BTBD3                 |
| 8117476a      | 1.28E-02 | 1.76        | up   | BTN3A3                |
| 7901993a      | 2.77E-03 | 3.31        | up   | CACHD1                |

| Transcript ID | p-value  | Fold Change | Reg  | Gene Symbol     |
|---------------|----------|-------------|------|-----------------|
| 7997504a      | 4.73E-03 | 3.24        | down | CDH13           |
| 7996819a      | 4.67E-03 | 1.75        | up   | CDH3            |
| 8104663a      | 4.03E-02 | 2.89        | up   | CDH6            |
| 7999553a      | 2.02E-02 | 1.56        | up   | CPPED1          |
| 8140579a      | 3.96E-04 | 5.22        | up   | CACNA2D1        |
| 8009334a      | 9.12E-03 | 2.19        | down | CACNG4          |
| 7939642a      | 1.85E-03 | 1.83        | up   | CREB3L1         |
| 8052735a      | 6.18E-04 | 1.52        | up   | CNRIP1          |
| 7958202a      | 9.66E-03 | 2.38        | down | CHST11          |
| 8060839a      | 1.14E-03 | 1.62        | down | CRLS1           |
| 8030448a      | 4.44E-02 | 2.46        | down | CPT1C           |
| 8010778a      | 4.61E-03 | 1.50        | up   | CSNK1D          |
| 8047403a      | 6.06E-03 | 1.57        | up   | CASP10          |
| 7951408a      | 9.28E-03 | 1.82        | up   | CARD16          |
| 7949650a      | 1.87E-02 | 1.58        | down | CTSF            |
| 8060772a      | 8.02E-04 | 1.74        | down | CDS2            |
| 8060675a      | 5.99E-03 | 1.52        | down | CDC25B          |
| 8003553a      | 2.26E-04 | 2.15        | up   | CENPBD1         |
| 8112376a      | 2.26E-04 | 1.79        | down | CENPK           |
| 8175531a      | 2.60E-03 | 2.61        | up   | CDR1;YTHDC2     |
| 8006433a      | 1.59E-02 | 2.28        | up   | CCL2            |
| 8049471a      | 2.65E-03 | 2.08        | down | CXCR7           |
| 7987012a      | 5.62E-03 | 1.74        | up   | CHRFAM7A;CHRNA7 |
| 7953936a      | 2.98E-02 | 3.22        | up   | C12orf59        |
| 7964677a      | 2.29E-03 | 1.60        | up   | C12orf66        |
| 7999903a      | 1.86E-04 | 1.53        | up   | C16orf88        |
| 8022310a      | 1.65E-04 | 7.15        | up   | C18orf58        |
| 8061305a      | 4.77E-03 | 1.51        | down | C20orf19        |
| 8064637a      | 7.63E-04 | 2.07        | down | C20orf194       |
| 8065433a      | 1.02E-03 | 2.43        | down | C20orf3         |
| 8064833a      | 1.66E-03 | 1.53        | down | C20orf30        |
| 8061019a      | 2.41E-04 | 2.08        | down | C20orf7         |
| 8061129a      | 7.35E-04 | 1.76        | down | C20orf72        |
| 8065280a      | 1.60E-02 | 1.87        | down | C20orf74        |
| 8060977a      | 1.66E-02 | 1.50        | down | C20orf94        |
| 8067932a      | 1.13E-02 | 2.48        | up   | C21orf34        |
| 8083599a      | 1.34E-02 | 2.30        | up   | C3orf55         |
| 8083223a      | 1.30E-02 | 1.89        | up   | C3orf58         |
| 8087374a      | 3.02E-03 | 1.61        | down | C3orf62;USP4    |
| 8088680a      | 5.10E-03 | 1.81        | down | C3orf64         |
| 8105661a      | 2.22E-03 | 1.67        | down | C5orf44         |
| 8105647a      | 1.81E-03 | 1.62        | down | C5orf44         |
| 8138647a      | 5.34E-03 | 1.58        | up   | C7orf31         |
| 8135734a      | 4.05E-02 | 1.70        | up   | C7orf58         |
| 8149315a      | 3.48E-04 | 2.56        | down | C8orf15         |
| 8154381a      | 2.63E-02 | 1.78        | up   | C9orf150        |

| Transcript ID | p-value  | Fold Change | Reg  | Gene Symbol       |
|---------------|----------|-------------|------|-------------------|
| 8164008a      | 1.97E-02 | 1.65        | down | C9orf45           |
| 8044391a      | 3.33E-02 | 1.61        | up   | MERTK             |
| 8112731a      | 2.46E-02 | 2.27        | down | F2RL2             |
| 8056343a      | 2.56E-03 | 3.31        | up   | COBLL1            |
| 8055208a      | 4.13E-04 | 1.51        | up   | CCDC115           |
| 7932082a      | 1.11E-02 | 2.56        | up   | CCDC3             |
| 8023401a      | 2.77E-03 | 2.84        | up   | CCDC68            |
| 7899346a      | 4.53E-02 | 1.68        | down | CCDC72            |
| 8089544a      | 3.14E-02 | 1.71        | down | CCDC80            |
| 7972750a      | 2.68E-02 | 1.52        | down | COL4A1            |
| 7970033a      | 3.19E-03 | 1.63        | down | COL4A2;STK24      |
| 8057620a      | 3.03E-02 | 2.68        | up   | COL5A2            |
| 7953603a      | 8.55E-03 | 2.24        | up   | C1S               |
| 8179331a      | 4.75E-03 | 1.57        | up   | C2                |
| 8003217a      | 7.63E-04 | 1.62        | up   | COX4NB            |
| 8065256a      | 4.31E-04 | 1.71        | down | CRNKL1            |
| 7951662a      | 1.31E-02 | 4.55        | up   | CRYAB             |
| 8061138a      | 1.08E-03 | 1.98        | down | CSRP2BP           |
| 8140955a      | 7.19E-03 | 1.58        | down | CDK6              |
| 8065403a      | 4.66E-03 | 1.56        | down | CST3              |
| 8146967a      | 2.13E-02 | 2.46        | up   | CRISPLD1          |
| 7898655a      | 1.06E-02 | 1.85        | up   | CDA               |
| 8051583a      | 1.34E-02 | 7.07        | down | CYP1B1            |
| 7974689a      | 7.17E-03 | 1.68        | down | DACT1             |
| 8064601a      | 1.49E-03 | 1.70        | down | DDR1              |
| 8160559a      | 4.17E-03 | 1.80        | up   | DDX58             |
| 8112081a      | 6.49E-04 | 1.52        | down | DHX29             |
| 8156199a      | 2.82E-02 | 2.26        | down | DAPK1             |
| 8059413a      | 4.00E-02 | 2.82        | up   | DOCK10            |
| 8112260a      | 3.18E-04 | 1.61        | down | DEPDC1B           |
| 8023727a      | 1.65E-03 | 6.19        | up   | DSEL              |
| 8022711a      | 2.40E-02 | 5.42        | up   | DSC2              |
| 8022692a      | 4.21E-02 | 8.15        | up   | DSC3              |
| 8061114a      | 1.68E-04 | 1.72        | down | DSTN              |
| 7999419a      | 5.77E-03 | 1.71        | up   | DEXI              |
| 7986685a      | 3.62E-03 | 1.61        | up   | DEXI;LOC100133165 |
| 8143154a      | 2.95E-02 | 2.17        | down | DGKI;DGKi         |
| 8168691a      | 3.81E-03 | 3.79        | down | DIAPH2            |
| 8112312a      | 4.13E-04 | 1.55        | down | DIMT1L            |
| 8179819a      | 6.18E-04 | 1.72        | up   | DDAH2             |
| 7931683a      | 7.86E-03 | 2.16        | down | DIP2C             |
| 8056222a      | 1.65E-04 | 6.50        | up   | DPP4              |
| 8165438a      | 5.07E-03 | 1.72        | down | DPP7              |
| 7906878a      | 8.72E-04 | 5.20        | up   | DDR2              |
| 7906900a      | 6.68E-04 | 4.33        | up   | DDR2              |
| 8046373a      | 6.90E-03 | 1.64        | up   | DLX1              |

| Transcript ID | p-value  | Fold Change | Reg  | Gene Symbol      |
|---------------|----------|-------------|------|------------------|
| 7985147a      | 1.31E-03 | 2.31        | down | DNAJA4           |
| 7902043a      | 6.13E-03 | 1.51        | up   | DNAJC6;LOC645195 |
| 8061211a      | 2.18E-03 | 1.67        | down | DTD1             |
| 7924450a      | 2.02E-02 | 2.49        | up   | DUSP10           |
| 8046792a      | 7.70E-03 | 1.50        | up   | DUSP19           |
| 7938128a      | 4.00E-03 | 1.68        | up   | DNHD1            |
| 7900159a      | 1.63E-03 | 1.71        | down | DNALI1           |
| 8008706a      | 3.62E-05 | 1.69        | up   | DYNLL2           |
| 7976698a      | 1.32E-03 | 2.12        | up   | EML1             |
| 8014063a      | 8.61E-03 | 2.03        | up   | EVI2B            |
| 8061428a      | 8.69E-03 | 1.85        | down | ENTPD6           |
| 8122099a      | 4.01E-02 | 2.11        | up   | ENPP1            |
| 8152522a      | 1.14E-02 | 2.17        | up   | ENPP2            |
| 8041225a      | 6.18E-04 | 1.71        | up   | EHD3             |
| 8123920a      | 2.40E-03 | 1.65        | up   | ELOVL2           |
| 8127767a      | 4.77E-02 | 2.51        | up   | ELOVL4           |
| 8112007a      | 6.71E-03 | 1.94        | down | EMB              |
| 8139840a      | 2.13E-02 | 1.76        | down | ERV3             |
| 8107044a      | 2.49E-02 | 1.83        | down | ERAP2            |
| 8041781a      | 2.33E-02 | 1.57        | up   | EPAS1            |
| 8092523a      | 3.68E-03 | 2.03        | up   | EHHADH           |
| 8132369a      | 1.67E-03 | 2.24        | up   | EPDR1            |
| 8095723a      | 7.93E-03 | 3.33        | up   | EPGN             |
| 8138289a      | 8.52E-04 | 2.77        | up   | ETV1             |
| 7993298a      | 5.62E-03 | 1.54        | up   | ERCC4            |
| 8112285a      | 1.86E-04 | 1.55        | down | ERCC8            |
| 7951545a      | 3.73E-03 | 2.02        | down | EXPH5            |
| 8063187a      | 2.43E-02 | 2.01        | down | EYA2             |
| 7904948a      | 4.54E-02 | 1.51        | up   | FAM108A1         |
| 8146533a      | 3.83E-03 | 1.87        | up   | FAM110B          |
| 7940147a      | 5.75E-03 | 1.57        | down | FAM111B          |
| 8173041a      | 1.68E-02 | 1.81        | up   | FAM120C          |
| 8169995a      | 3.12E-03 | 1.68        | up   | FAM122C          |
| 8101728a      | 3.41E-02 | 1.68        | up   | FAM13A           |
| 8046895a      | 3.65E-04 | 6.18        | up   | FAM171B          |
| 7991453a      | 2.29E-02 | 1.66        | up   | FAM174B          |
| 7964631a      | 2.13E-02 | 1.55        | up   | FAM19A2          |
| 8022283a      | 1.14E-03 | 4.55        | up   | FAM38B           |
| 8022295a      | 1.07E-04 | 6.56        | up   | FAM38B2          |
| 8127778a      | 4.48E-04 | 1.86        | up   | FAM46A           |
| 8174767a      | 2.33E-02 | 3.66        | down | FAM70A           |
| 8064581a      | 1.27E-03 | 1.70        | down | FASTKD5;UBOX5    |
| 7948630a      | 1.05E-02 | 1.55        | down | FADS3            |
| 8144239a      | 3.61E-02 | 1.72        | down | FBXO25           |
| 8152703a      | 4.53E-02 | 1.78        | up   | FBXO32           |
| 7917954a      | 2.21E-03 | 3.33        | up   | FRRS1            |

| Transcript ID | p-value  | Fold Change | Reg  | Gene Symbol                             |
|---------------|----------|-------------|------|-----------------------------------------|
| 8056257a      | 2.13E-03 | 3.50        | up   | FAP                                     |
| 8073775a      | 2.54E-02 | 1.97        | down | FBLN1                                   |
| 8064432a      | 6.06E-03 | 1.65        | down | FKBP1A                                  |
| 8057045a      | 9.74E-04 | 1.72        | up   | FKBP7                                   |
| 8179688a      | 3.35E-04 | 1.58        | up   | FLOT1                                   |
| 8023995a      | 2.63E-02 | 1.57        | down | FSTL3                                   |
| 8054045a      | 6.55E-04 | 1.56        | up   | FAHD2B;FAHD2A;LOC729234                 |
| 8129071a      | 3.64E-03 | 2.41        | up   | FRK                                     |
| 8131069a      | 4.38E-03 | 1.50        | up   | GPER                                    |
| 8045336a      | 5.57E-03 | 1.57        | up   | GPR39;LYPD1                             |
| 7999909a      | 3.06E-04 | 3.09        | up   | GPRC5B                                  |
| 8003410a      | 4.89E-03 | 1.57        | up   | GALNS                                   |
| 8041542a      | 5.98E-04 | 1.54        | up   | GALM                                    |
| 8042283a      | 4.24E-03 | 1.56        | up   | HSPC159                                 |
| 8146945a      | 9.23E-03 | 1.61        | up   | GDAP1                                   |
| 8121749a      | 4.44E-04 | 3.18        | up   | GJA1;IFT140                             |
| 7936494a      | 7.94E-04 | 6.34        | down | GFRA1                                   |
| 8061373a      | 3.19E-03 | 1.66        | down | GZF1                                    |
| 7997414a      | 4.28E-03 | 1.50        | up   | GAN                                     |
| 8061471a      | 2.19E-03 | 1.92        | down | GINS1                                   |
| 8159900a      | 3.18E-02 | 1.50        | down | GLIS3                                   |
| 8046283a      | 2.12E-03 | 1.66        | up   | GAD1                                    |
| 7901460a      | 4.30E-02 | 1.95        | down | GPX7                                    |
| 8045816a      | 3.11E-05 | 1.62        | up   | GPD2                                    |
| 7922104a      | 1.18E-03 | 1.63        | up   | GCSH                                    |
| 8131844a      | 9.76E-03 | 3.88        | up   | GNPMB                                   |
| 7965941a      | 7.11E-03 | 1.84        | up   | GLT8D2                                  |
| 7981752a      | 4.28E-02 | 1.64        | down | GOLGA8D;GOLGA8E;GOLGA8G;GOLGA8F;GOLGA8C |
| 8081758a      | 9.66E-03 | 1.88        | up   | GRAMD1C                                 |
| 8046003a      | 6.28E-03 | 5.94        | up   | GCA                                     |
| 7970329a      | 1.87E-03 | 2.22        | down | GAS6                                    |
| 8171079a      | 3.64E-03 | 1.51        | up   | GTPBP6                                  |
| 8134257a      | 1.18E-03 | 3.84        | up   | GNG11                                   |
| 8117034a      | 1.33E-02 | 1.70        | up   | GMPR                                    |
| 7917561a      | 2.39E-02 | 1.91        | up   | GBP4                                    |
| 8046906a      | 1.06E-02 | 7.74        | up   | GULP1                                   |
| 7928107a      | 1.68E-02 | 2.48        | down | H2AFY2                                  |
| 7975076a      | 1.63E-02 | 1.78        | up   | HSPA2                                   |
| 8057898a      | 6.95E-03 | 1.65        | up   | HECW2                                   |
| 8089911a      | 1.56E-02 | 2.21        | up   | HCLS1                                   |
| 8117343a      | 1.20E-03 | 1.55        | up   | HFE                                     |
| 7898677a      | 1.61E-02 | 1.61        | up   | HS6ST1                                  |
| 7946988a      | 7.18E-03 | 1.56        | up   | HPS5                                    |
| 7902282a      | 1.22E-03 | 1.65        | up   | HLA3                                    |
| 8127743a      | 3.94E-02 | 1.79        | up   | HMG3                                    |
| 8040238a      | 2.77E-03 | 1.68        | up   | HPCAL1                                  |

| Transcript ID | p-value  | Fold Change | Reg  | Gene Symbol                               |
|---------------|----------|-------------|------|-------------------------------------------|
| 7988124a      | 3.18E-04 | 2.37        | down | HISPPD2A                                  |
| 8124492a      | 3.25E-02 | 1.83        | up   | HIST1H2BK                                 |
| 8117415a      | 9.03E-03 | 1.59        | up   | HIST1H3E                                  |
| 8117589a      | 9.37E-03 | 1.73        | up   | HIST1H3H                                  |
| 7919584a      | 1.72E-02 | 1.77        | up   | HIST2H2BF;HIST2H2BA;HIST2H2BE             |
| 7919627a      | 2.10E-02 | 1.96        | up   | HIST2H4A;HIST2H4B                         |
| 8003116a      | 2.48E-03 | 1.61        | up   | HSDL1                                     |
| 7933638a      | 1.46E-02 | 1.53        | down | FLJ31958                                  |
| 8144228a      | 7.17E-03 | 1.73        | up   | FLJ36840                                  |
| 7918620a      | 1.39E-03 | 1.71        | up   | FLJ36116                                  |
| 8064868a      | 1.42E-03 | 2.38        | down | RP5-1022P6.2                              |
| 8179704a      | 2.88E-03 | 1.65        | up   | IER3                                      |
| 7922018a      | 7.35E-04 | 2.84        | down | ILDR2                                     |
| 8105545a      | 8.41E-05 | 1.82        | down | IPO11                                     |
| 8117120a      | 4.92E-05 | 1.57        | up   | ID4                                       |
| 8060611a      | 2.02E-03 | 1.70        | down | ITPA                                      |
| 8150906a      | 6.80E-03 | 1.55        | down | IMPAD1                                    |
| 8008151a      | 2.68E-02 | 1.96        | down | IGF2BP1                                   |
| 8046695a      | 2.38E-02 | 3.29        | up   | ITGA4;CERKL                               |
| 7937335a      | 7.13E-04 | 3.07        | up   | IFITM1                                    |
| 8056285a      | 4.00E-03 | 2.54        | up   | IFIH1                                     |
| 7976443a      | 2.89E-04 | 2.51        | up   | IFI27                                     |
| 7929065a      | 8.81E-03 | 1.76        | up   | IFIT1                                     |
| 7929047a      | 2.13E-02 | 1.74        | up   | IFIT2                                     |
| 8043995a      | 9.62E-03 | 2.32        | up   | IL1R1                                     |
| 8169580a      | 2.38E-02 | 1.61        | up   | IL13RA1                                   |
| 8131803a      | 7.35E-04 | 1.93        | up   | IL6                                       |
| 8112139a      | 1.65E-04 | 1.65        | down | IL6ST                                     |
| 7956878a      | 1.80E-02 | 3.88        | up   | IRAK3                                     |
| 7921033a      | 2.45E-02 | 1.55        | down | IQGAP3                                    |
| 8059878a      | 2.76E-02 | 1.54        | down | IQCA1;LOC100129258                        |
| 8058552a      | 1.06E-02 | 1.51        | up   | IDH1                                      |
| 8068024a      | 2.33E-02 | 2.03        | up   | JAM2                                      |
| 7972682a      | 2.02E-02 | 1.65        | down | KDEL1                                     |
| 8015387a      | 3.19E-03 | 5.56        | down | KRT17                                     |
| 8005449a      | 4.13E-04 | 4.76        | down | KRT17                                     |
| 8013042a      | 3.39E-03 | 3.08        | down | KRT17                                     |
| 7990941a      | 4.12E-02 | 1.58        | down | KIAA1920;LOC100291610;LOC390627;LOC440297 |
| 8079237a      | 5.03E-03 | 1.57        | down | KIF15                                     |
| 8065089a      | 1.18E-02 | 2.18        | down | KIF16B                                    |
| 7929078a      | 1.37E-04 | 1.66        | down | KIF20B                                    |
| 8156160a      | 1.43E-02 | 1.62        | down | KIF27                                     |
| 8045637a      | 4.40E-03 | 3.48        | up   | KIF5C                                     |
| 8105523a      | 1.86E-04 | 1.52        | down | KIF2A                                     |
| 8045539a      | 1.38E-03 | 2.43        | up   | KYNU                                      |
| 8022176a      | 3.92E-02 | 1.75        | up   | LAMA1                                     |

| Transcript ID | p-value  | Fold Change | Reg  | Gene Symbol     |
|---------------|----------|-------------|------|-----------------|
| 8092707a      | 4.34E-02 | 1.63        | down | LEPREL1         |
| 8049542a      | 3.91E-02 | 1.69        | up   | LRRFIP1         |
| 8092839a      | 3.58E-03 | 1.98        | up   | LRRC15          |
| 8117243a      | 2.22E-02 | 1.92        | up   | LRRC16A         |
| 8135218a      | 2.12E-02 | 2.27        | up   | LRRC17          |
| 8075310a      | 1.30E-02 | 1.70        | down | LIF;MGC20647    |
| 8111677a      | 6.23E-04 | 1.76        | up   | LIFR            |
| 7948332a      | 2.48E-03 | 2.39        | up   | LPXN            |
| 8075637a      | 2.08E-03 | 2.05        | down | LARGE           |
| 8092541a      | 3.65E-04 | 6.30        | up   | LIPH            |
| 8027793a      | 1.05E-02 | 1.60        | down | LSR             |
| 8045674a      | 1.15E-02 | 3.46        | up   | LYPD6           |
| 8045664a      | 1.42E-02 | 3.43        | up   | LYPD6B          |
| 8178059a      | 1.93E-03 | 1.75        | up   | LY6G5B;CSNK2B   |
| 7917276a      | 1.22E-02 | 2.16        | up   | LPAR3           |
| 8110841a      | 7.74E-03 | 1.94        | up   | LPCAT1          |
| 8180086a      | 2.26E-04 | 2.15        | up   | HLA-DMA;HLA-DMB |
| 7994659a      | 1.10E-02 | 1.50        | up   | MVP             |
| 8129254a      | 3.39E-03 | 3.87        | up   | MAN1A1          |
| 7951271a      | 2.26E-02 | 4.30        | up   | MMP1            |
| 8062123a      | 1.67E-03 | 2.65        | down | MMP24           |
| 8064967a      | 1.22E-03 | 1.63        | down | MKKS            |
| 8091972a      | 1.92E-02 | 2.33        | up   | MECOM           |
| 7989146a      | 3.16E-02 | 1.62        | up   | MNS1            |
| 7952205a      | 3.00E-02 | 1.51        | down | MCAM            |
| 8083494a      | 1.75E-02 | 2.90        | up   | MME             |
| 8112182a      | 8.41E-05 | 1.81        | down | MIER3           |
| 7992071a      | 1.72E-02 | 1.75        | down | MSLN            |
| 7995797a      | 4.99E-02 | 1.74        | down | MT1E            |
| 7995793a      | 1.53E-02 | 1.58        | down | MT1L            |
| 7954196a      | 3.80E-02 | 1.63        | up   | MGST1           |
| 8047926a      | 6.72E-03 | 1.77        | up   | MAP2            |
| 8060813a      | 2.56E-03 | 1.71        | down | MCM8            |
| 8129214a      | 3.86E-03 | 1.61        | up   | MCM9            |
| 8179139a      | 1.39E-03 | 1.63        | up   | MRPS18B         |
| 8105181a      | 4.55E-02 | 1.56        | up   | MRPS30          |
| 8105436a      | 3.62E-05 | 2.11        | down | MAP3K1          |
| 8084589a      | 2.83E-03 | 1.62        | up   | MAP3K13         |
| 8129804a      | 2.06E-02 | 2.59        | up   | MAP3K5          |
| 8166925a      | 4.40E-02 | 2.40        | up   | MAOA            |
| 7993453a      | 2.73E-02 | 1.51        | down | MPV17L          |
| 7917283a      | 1.66E-02 | 1.80        | up   | MCOLN2          |
| 7917304a      | 4.17E-02 | 1.86        | up   | MCOLN3          |
| 7986293a      | 6.55E-03 | 4.14        | up   | MCTP2           |
| 8029273a      | 1.00E-02 | 1.66        | down | MEGF8           |
| 8151334a      | 7.67E-03 | 2.00        | up   | MSC             |

| Transcript ID | p-value  | Fold Change | Reg  | Gene Symbol                              |
|---------------|----------|-------------|------|------------------------------------------|
| 7927827a      | 8.31E-03 | 2.73        | up   | MYPN                                     |
| 8111153a      | 4.65E-03 | 1.71        | up   | MYO10                                    |
| 8065510a      | 1.34E-02 | 1.68        | down | NANP                                     |
| 8061262a      | 1.27E-03 | 1.85        | down | NAT5                                     |
| 8002303a      | 1.87E-02 | 1.55        | up   | NQO1                                     |
| 8116610a      | 3.07E-04 | 1.58        | up   | NQO2;LOC401233                           |
| 8105311a      | 4.88E-04 | 1.85        | down | NDUFS4                                   |
| 8065372a      | 1.14E-03 | 2.13        | down | NAPB                                     |
| 8123936a      | 1.96E-02 | 2.10        | up   | NEDD9                                    |
| 7957298a      | 3.39E-03 | 2.91        | up   | NAV3                                     |
| 8043909a      | 4.62E-04 | 2.49        | up   | NPAS2                                    |
| 8064438a      | 3.54E-04 | 1.64        | down | NSFL1C                                   |
| 7978644a      | 5.75E-03 | 1.55        | up   | NFKBIA                                   |
| 8085431a      | 2.53E-02 | 1.97        | down | NUP210                                   |
| 8050497a      | 2.48E-03 | 1.60        | up   | OSR1                                     |
| 8098441a      | 5.08E-04 | 2.61        | down | ODZ3                                     |
| 7982294a      | 1.42E-02 | 1.50        | down | OTUD7A;MGC131512                         |
| 7947338a      | 2.29E-03 | 4.04        | down | PAX6                                     |
| 7904843a      | 1.15E-02 | 2.16        | down | PDZK1;PDZK1P1                            |
| 7947512a      | 2.33E-02 | 2.55        | down | PAMR1                                    |
| 8107133a      | 3.33E-03 | 1.58        | down | PAM                                      |
| 8105633a      | 9.36E-05 | 1.72        | down | PPWD1                                    |
| 7971077a      | 1.42E-02 | 3.27        | up   | POSTN                                    |
| 8080306a      | 7.09E-04 | 1.53        | down | PHF7                                     |
| 7930980a      | 2.78E-02 | 2.18        | down | PPAPDC1A                                 |
| 8102532a      | 1.42E-02 | 1.88        | up   | PDE5A                                    |
| 8056151a      | 1.04E-02 | 1.67        | up   | PLA2R1                                   |
| 7908351a      | 6.26E-03 | 1.54        | up   | PLA2G4A                                  |
| 7948987a      | 1.61E-02 | 1.67        | up   | PLA2G16                                  |
| 8060897a      | 2.62E-02 | 2.13        | down | PLCB4                                    |
| 8091306a      | 1.16E-02 | 2.45        | up   | PLSCR4                                   |
| 8166049a      | 2.26E-03 | 1.63        | up   | PRPS2                                    |
| 7994928a      | 2.91E-05 | 1.59        | up   | PHKG2                                    |
| 8061447a      | 4.03E-03 | 1.75        | down | PYGB                                     |
| 8140620a      | 2.56E-03 | 1.83        | up   | PCLO                                     |
| 7903214a      | 1.24E-02 | 1.62        | up   | LPPR4                                    |
| 7951351a      | 5.75E-03 | 1.64        | up   | PDGFD                                    |
| 8144802a      | 7.26E-03 | 2.18        | up   | PDGFRL                                   |
| 8041644a      | 3.15E-02 | 1.54        | up   | PLEKHH2                                  |
| 8129985a      | 2.04E-02 | 1.65        | down | PLAGL1                                   |
| 7923991a      | 4.93E-03 | 1.70        | down | PLXNA2                                   |
| 7898057a      | 8.74E-03 | 2.18        | down | PDPN                                     |
| 8112202a      | 6.23E-05 | 2.39        | down | PLK2                                     |
| 8061171a      | 4.09E-04 | 1.87        | down | POLR3F;C20orf12                          |
| 8106820a      | 3.79E-02 | 2.02        | up   | POLR3G                                   |
| 8074714a      | 4.48E-02 | 1.71        | down | POM121L1P;POM121L10P;POM121L9P;POM121L8P |



| Transcript ID | p-value  | Fold Change | Reg  | Gene Symbol                |
|---------------|----------|-------------|------|----------------------------|
| 8000738a      | 2.07E-04 | 1.76        | up   | KCTD13                     |
| 7909730a      | 9.28E-03 | 1.98        | up   | KCNK2                      |
| 7923043a      | 3.47E-03 | 2.32        | up   | KCNT2                      |
| 8009502a      | 6.04E-03 | 1.72        | up   | KCNJ2                      |
| 7957126a      | 2.71E-02 | 1.56        | up   | KCNMB4                     |
| 8120654a      | 1.76E-02 | 2.67        | up   | KCNQ5                      |
| 8172493a      | 6.38E-03 | 2.07        | up   | KCND1                      |
| 8051785a      | 1.56E-02 | 1.62        | up   | KCNG3                      |
| 8056303a      | 1.72E-02 | 4.53        | up   | KCNH7                      |
| 8040278a      | 1.68E-04 | 2.21        | up   | PQLC3                      |
| 8121257a      | 1.57E-02 | 1.65        | up   | PRDM1                      |
| 7906954a      | 3.65E-04 | 3.05        | up   | PBX1                       |
| 8157890a      | 2.70E-03 | 1.81        | down | PBX3                       |
| 7962375a      | 3.96E-02 | 2.90        | down | PRICKLE1                   |
| 8172561a      | 1.67E-03 | 1.53        | up   | PRICKLE3                   |
| 8060758a      | 5.43E-03 | 1.53        | down | PRNP                       |
| 8111490a      | 3.40E-02 | 1.83        | up   | PRLR                       |
| 8064844a      | 5.08E-04 | 1.77        | down | PCNA                       |
| 7902527a      | 3.51E-02 | 1.92        | up   | PTGFR                      |
| 7922976a      | 9.23E-03 | 1.56        | up   | PTGS2                      |
| 8102468a      | 1.77E-04 | 3.89        | up   | PRSS12                     |
| 8060379a      | 2.48E-03 | 1.54        | down | PSMF1                      |
| 8083749a      | 4.47E-02 | 1.74        | up   | PPM1L                      |
| 8134351a      | 4.11E-02 | 1.77        | up   | PPP1R9A                    |
| 8082869a      | 7.27E-03 | 1.62        | down | PPP2R3A                    |
| 8060539a      | 2.53E-03 | 1.61        | down | PTPRA;VPS16                |
| 7964872a      | 6.58E-03 | 2.34        | down | PTPRB                      |
| 8080810a      | 8.62E-03 | 1.96        | down | PTPRG                      |
| 8059186a      | 1.71E-02 | 1.55        | up   | PTPRN                      |
| 8097449a      | 3.86E-02 | 1.71        | up   | PCDH10                     |
| 8108697a      | 4.95E-02 | 2.48        | down | PCDHB5                     |
| 7938231a      | 2.32E-02 | 1.55        | up   | PPFIBP2                    |
| 8001030a      | 4.00E-03 | 1.66        | up   | PYCARD                     |
| 7954382a      | 2.62E-02 | 1.52        | down | PYROXD1;RECQL              |
| 8001147a      | 2.25E-03 | 1.63        | up   | RAB43;ISY1                 |
| 8180144a      | 2.11E-03 | 1.56        | up   | RGL2                       |
| 8166243a      | 1.97E-02 | 2.03        | up   | REPS2                      |
| 8161945a      | 3.73E-03 | 2.04        | down | RASEF                      |
| 7908409a      | 4.69E-02 | 1.74        | up   | RGS2                       |
| 8065230a      | 7.43E-03 | 1.72        | down | RBBP9                      |
| 7940775a      | 4.19E-02 | 1.79        | up   | RARRES3                    |
| 8129458a      | 3.19E-03 | 2.37        | up   | ARHGAP18                   |
| 8096160a      | 3.00E-03 | 2.05        | up   | ARHGAP24                   |
| 8136987a      | 4.69E-02 | 1.54        | down | ARHGEF5;ARHGEF5L;LOC728377 |
| 8053142a      | 8.41E-05 | 1.77        | up   | RTKN                       |
| 7977507a      | 2.22E-02 | 1.51        | up   | RPPH1                      |

| Transcript ID | p-value  | Fold Change | Reg  | Gene Symbol             |
|---------------|----------|-------------|------|-------------------------|
| 8123717a      | 6.58E-03 | 1.51        | up   | RPP40                   |
| 7902023a      | 4.78E-02 | 1.95        | up   | RAVER2                  |
| 8003348a      | 7.63E-04 | 1.52        | up   | RNF166                  |
| 7994939a      | 6.18E-04 | 1.65        | up   | RNF40                   |
| 8078330a      | 7.34E-03 | 2.11        | down | RBMS3                   |
| 7993274a      | 9.26E-04 | 1.57        | up   | RUNDC2A                 |
| 7994576a      | 8.92E-04 | 1.67        | up   | RUNDC2C;RUNDC2A;RUNDC2B |
| 7920278a      | 1.63E-02 | 1.79        | up   | S100A3                  |
| 8058091a      | 3.17E-03 | 3.21        | up   | SATB2                   |
| 8006531a      | 7.10E-03 | 2.19        | up   | SLFN5                   |
| 8057394a      | 7.36E-04 | 2.55        | up   | SESTD1                  |
| 8061186a      | 9.94E-04 | 1.69        | down | SEC23B                  |
| 8019486a      | 3.12E-02 | 1.53        | down | SECTM1                  |
| 8059345a      | 6.84E-03 | 1.64        | up   | SCG2                    |
| 7983527a      | 7.51E-03 | 1.74        | up   | SEMA6D                  |
| 8042696a      | 1.76E-03 | 1.52        | up   | SPR                     |
| 8003722a      | 6.23E-05 | 2.23        | up   | SRR;TSR1                |
| 8178164a      | 9.01E-03 | 1.53        | up   | STK19;LOC100294221      |
| 7946365a      | 3.27E-02 | 1.65        | down | STK33                   |
| 8060427a      | 7.10E-03 | 1.71        | down | STK35                   |
| 8128079a      | 1.17E-02 | 1.60        | up   | SRrp35                  |
| 8123609a      | 3.18E-03 | 1.58        | up   | SERPINB9                |
| 8059376a      | 2.89E-04 | 3.33        | up   | SERPINE2                |
| 8112337a      | 1.34E-03 | 1.63        | down | SFRS12IP1               |
| 8120833a      | 2.56E-02 | 1.94        | up   | SH3BGRL2                |
| 8072847a      | 5.07E-03 | 1.51        | up   | SH3BP1;PDXP             |
| 8003060a      | 3.15E-03 | 2.65        | down | SDR42E1                 |
| 8179851a      | 8.47E-05 | 1.59        | up   | NEU1                    |
| 8060418a      | 4.71E-03 | 2.02        | down | SIRPA                   |
| 8031825a      | 2.19E-02 | 1.52        | down | LOC100288322;ZNF587     |
| 8068496a      | 2.40E-03 | 1.71        | down | SIM2                    |
| 7906613a      | 2.93E-02 | 1.50        | down | SLAMF7                  |
| 8094301a      | 4.80E-04 | 3.79        | up   | SLIT2                   |
| 8112409a      | 1.02E-03 | 1.67        | down | SGTB                    |
| 8061075a      | 7.94E-04 | 1.75        | down | SNRPB2                  |
| 7981945a      | 6.58E-04 | 2.23        | down | SNRPN                   |
| 7982098a      | 2.80E-02 | 2.50        | down | SNORD109A;SNORD109B     |
| 7981970a      | 1.03E-02 | 2.06        | down | SNORD116-11             |
| 7981974a      | 1.32E-03 | 2.14        | down | SNORD116-13             |
| 7981992a      | 1.61E-02 | 1.75        | down | SNORD116-22             |
| 7981994a      | 3.91E-02 | 1.93        | down | SNORD116-23             |
| 7981998a      | 2.95E-02 | 1.58        | down | SNORD116-25             |
| 7982004a      | 2.05E-02 | 1.60        | down | SNORD116-28             |
| 7982006a      | 1.56E-02 | 1.65        | down | SNORD116-29             |
| 7981955a      | 3.12E-02 | 2.17        | down | SNORD116-4;SNRPN        |
| 8025498a      | 4.15E-02 | 1.51        | down | SNORA70;RPL10           |

| Transcript ID | p-value  | Fold Change | Reg  | Gene Symbol           |
|---------------|----------|-------------|------|-----------------------|
| 7994889a      | 2.46E-03 | 1.50        | up   | SRCAP                 |
| 8104930a      | 3.91E-02 | 1.73        | up   | SLC1A3                |
| 8094960a      | 4.83E-03 | 1.78        | down | SLC10A4               |
| 8090214a      | 7.07E-03 | 1.85        | up   | SLC12A8               |
| 8059538a      | 1.63E-02 | 1.66        | up   | SLC19A3               |
| 7904226a      | 3.54E-02 | 1.83        | up   | SLC22A15              |
| 8145291a      | 2.18E-02 | 1.66        | down | SLC25A37              |
| 7910618a      | 3.83E-02 | 1.54        | down | SLC35F3               |
| 7962559a      | 2.49E-02 | 1.78        | up   | SLC38A4               |
| 8172425a      | 6.82E-03 | 5.45        | down | SLC38A5               |
| 8112121a      | 7.40E-05 | 2.00        | down | SLC38A9               |
| 8018082a      | 7.35E-04 | 1.52        | up   | SLC39A11              |
| 8101992a      | 2.86E-02 | 3.14        | up   | SLC39A8               |
| 8064613a      | 3.30E-03 | 2.24        | down | SLC4A11               |
| 8057677a      | 7.10E-03 | 2.48        | up   | SLC40A1               |
| 8013616a      | 1.27E-02 | 1.64        | up   | SLC46A1;SARM1;TMEM199 |
| 7986214a      | 2.53E-03 | 1.66        | down | SLCO3A1               |
| 8113369a      | 3.03E-03 | 2.43        | up   | SLCO4C1               |
| 7944667a      | 2.04E-02 | 1.66        | up   | SORL1                 |
| 8065165a      | 2.44E-03 | 1.64        | down | SNX5                  |
| 8012247a      | 1.36E-03 | 1.61        | up   | SAT2                  |
| 8010061a      | 2.22E-02 | 1.59        | up   | SPHK1                 |
| 7903393a      | 1.70E-02 | 1.63        | down | S1PR1                 |
| 8138689a      | 8.03E-03 | 2.90        | up   | SKAP2                 |
| 8081219a      | 6.10E-04 | 2.18        | up   | ST3GAL6               |
| 7968892a      | 1.14E-02 | 1.80        | down | SERP2                 |
| 7983512a      | 3.05E-02 | 1.76        | up   | SQRDL                 |
| 8064375a      | 2.23E-03 | 1.79        | down | SRXN1                 |
| 8105353a      | 2.91E-05 | 1.68        | down | SKIV2L2               |
| 7957338a      | 8.91E-03 | 1.75        | up   | SYT1                  |
| 8147461a      | 3.49E-02 | 3.37        | up   | SDC2                  |
| 8152606a      | 1.04E-02 | 1.65        | up   | SNTB1                 |
| 8101762a      | 2.11E-03 | 3.31        | up   | SNCA                  |
| 8178977a      | 7.87E-03 | 1.98        | up   | TAPBP                 |
| 8065018a      | 6.55E-04 | 1.92        | down | TASP1                 |
| 8136645a      | 2.02E-03 | 1.67        | down | TAS2R4                |
| 8064336a      | 2.55E-03 | 1.66        | down | TBC1D20               |
| 8123961a      | 2.89E-04 | 1.57        | up   | TBC1D7                |
| 8150138a      | 3.63E-02 | 2.13        | up   | TEX15                 |
| 8131600a      | 5.21E-03 | 2.37        | up   | TSPAN13               |
| 8064939a      | 6.61E-03 | 3.19        | down | TMX4                  |
| 8075857a      | 2.81E-02 | 1.60        | up   | TST                   |
| 8130867a      | 4.78E-03 | 6.04        | down | THBS2                 |
| 8169073a      | 4.93E-02 | 1.87        | down | TMSB15B;H2BFXP        |
| 8007008a      | 1.10E-02 | 1.53        | up   | THRA;NR1D1            |
| 8096411a      | 6.68E-04 | 1.59        | up   | TIGD2                 |

| Transcript ID | p-value  | Fold Change | Reg  | Gene Symbol  |
|---------------|----------|-------------|------|--------------|
| 8072626a      | 4.93E-02 | 2.53        | down | TIMP3        |
| 8141016a      | 1.54E-02 | 2.77        | up   | TFPI2        |
| 8013771a      | 2.96E-03 | 2.10        | up   | TLCD1        |
| 8174228a      | 7.93E-03 | 1.59        | up   | TCEAL8       |
| 8023415a      | 9.53E-03 | 4.09        | up   | TCF4         |
| 7909789a      | 1.34E-02 | 1.61        | down | TGFB2        |
| 8156826a      | 3.31E-03 | 1.64        | down | TGFBR1       |
| 7944082a      | 2.95E-02 | 1.66        | down | TAGLN        |
| 7954985a      | 1.22E-03 | 2.19        | down | TMEM117      |
| 8098041a      | 3.32E-02 | 1.67        | up   | TMEM144      |
| 7993807a      | 2.41E-02 | 1.51        | up   | TMEM159      |
| 8106170a      | 3.47E-03 | 1.88        | up   | TMEM171      |
| 8044417a      | 6.18E-04 | 1.63        | up   | TMEM87B      |
| 8057803a      | 4.33E-02 | 1.77        | up   | TMEFF2       |
| 8152453a      | 3.85E-03 | 2.78        | up   | TRPS1        |
| 8012953a      | 5.43E-03 | 1.73        | up   | TRIM16       |
| 8005475a      | 7.17E-03 | 2.24        | up   | TRIM16L      |
| 8117321a      | 7.03E-05 | 1.90        | up   | TRIM38       |
| 8064879a      | 3.21E-03 | 1.60        | down | TRMT6        |
| 8167835a      | 1.75E-03 | 2.17        | up   | TRO          |
| 7983734a      | 2.62E-02 | 2.24        | down | TMOD2        |
| 8059177a      | 6.18E-03 | 1.58        | down | TUBA4A       |
| 8121838a      | 7.87E-03 | 1.75        | up   | TPD52L1      |
| 7952249a      | 1.84E-02 | 1.62        | down | USP2         |
| 7972369a      | 5.55E-03 | 1.59        | down | UGGT2        |
| 8045835a      | 1.30E-02 | 1.97        | up   | GALNT5       |
| 8086352a      | 1.51E-03 | 1.75        | down | ULK4         |
| 8091678a      | 3.97E-02 | 1.67        | up   | VEPH1        |
| 8154100a      | 5.11E-04 | 2.57        | down | VLDLR        |
| 7960544a      | 3.18E-04 | 1.56        | up   | VAMP1;TAPBPL |
| 7962689a      | 1.64E-02 | 1.62        | up   | VDR          |
| 8138277a      | 1.13E-03 | 3.03        | up   | VWDE         |
| 8138258a      | 1.86E-02 | 1.92        | up   | VWDE         |
| 8089596a      | 1.99E-02 | 1.63        | down | WDR52        |
| 8048870a      | 4.74E-02 | 1.76        | up   | WDR69        |
| 8126952a      | 2.85E-04 | 1.93        | down | WTAP         |
| 8149307a      | 1.86E-04 | 1.64        | down | XKR6         |
| 8074773a      | 9.36E-04 | 1.51        | up   | YDJC         |
| 8089701a      | 7.33E-03 | 3.17        | up   | ZBTB20       |
| 8164002a      | 2.29E-03 | 1.50        | down | ZBTB26       |
| 7926916a      | 1.13E-02 | 1.67        | down | ZEB1         |
| 8061154a      | 4.65E-03 | 1.55        | down | ZNF133       |
| 8030954a      | 1.48E-02 | 1.60        | down | ZNF137       |
| 8039674a      | 3.19E-03 | 1.92        | down | ZNF154       |
| 7938183a      | 4.13E-02 | 2.62        | down | ZNF215       |
| 7933180a      | 1.03E-02 | 1.83        | down | ZNF239       |

| Transcript ID | p-value  | Fold Change | Reg  | Gene Symbol                                    |
|---------------|----------|-------------|------|------------------------------------------------|
| 8153920a      | 2.58E-03 | 1.65        | down | ZNF250                                         |
| 8153935a      | 1.74E-02 | 1.64        | down | ZNF252                                         |
| 7995258a      | 2.77E-03 | 1.56        | up   | ZNF267                                         |
| 8074845a      | 4.09E-03 | 2.23        | up   | ZNF280B                                        |
| 8013026a      | 7.49E-04 | 1.75        | down | ZNF287                                         |
| 7927062a      | 6.06E-03 | 1.89        | down | ZNF33A                                         |
| 8064514a      | 3.39E-03 | 1.71        | down | ZNF343                                         |
| 8028194a      | 1.07E-02 | 1.60        | down | ZNF382                                         |
| 8157193a      | 1.34E-02 | 1.50        | down | ZNF483                                         |
| 7927173a      | 7.94E-04 | 1.87        | down | ZNF485                                         |
| 8027304a      | 3.75E-02 | 1.64        | down | ZNF493                                         |
| 8099364a      | 1.63E-02 | 2.13        | down | ZNF518B                                        |
| 8031732a      | 1.20E-02 | 1.56        | down | ZNF547;TRAPPC2P1                               |
| 8148276a      | 1.72E-02 | 1.67        | up   | ZNF572                                         |
| 8038904a      | 2.12E-03 | 1.55        | down | ZNF577                                         |
| 8036373a      | 5.04E-03 | 1.61        | down | ZNF585A                                        |
| 8036389a      | 2.76E-02 | 1.50        | down | ZNF585B                                        |
| 8113761a      | 1.69E-02 | 2.00        | down | ZNF608                                         |
| 8111129a      | 3.77E-03 | 1.60        | up   | ZNF622                                         |
| 8148658a      | 1.20E-02 | 1.52        | down | ZNF623                                         |
| 8079198a      | 3.85E-03 | 2.08        | down | ZNF660;ZNF197                                  |
| 8030950a      | 2.32E-02 | 1.62        | down | ZNF701                                         |
| 8027348a      | 6.04E-03 | 5.85        | up   | ZNF730                                         |
| 8098745a      | 3.91E-02 | 2.23        | down | ZNF732                                         |
| 8039645a      | 1.40E-02 | 1.58        | down | ZNF772                                         |
| 8046815a      | 2.22E-02 | 4.11        | up   | ZNF804A                                        |
| 8039692a      | 2.15E-02 | 1.67        | down | ZNF814;ZNF552;ZNF587;LOC100288322;LOC100293516 |
| 8038967a      | 4.64E-02 | 1.59        | down | ZNF83                                          |
| 8025984a      | 2.21E-03 | 1.96        | down | ZNF844                                         |
| 8000399a      | 4.52E-04 | 1.66        | up   | ZKSCAN2                                        |
| 8173261a      | 4.34E-04 | 3.49        | down | ZC4H2                                          |
| 8105506a      | 3.65E-04 | 1.61        | down | ZSWIM6                                         |
| 8004510a      | 7.03E-04 | 2.32        | up   | CD68                                           |
| 8123606a      | 2.11E-03 | 2.32        | up   | MGC39372                                       |
| 8089464a      | 4.55E-02 | 1.99        | up   | LOC151760                                      |
| 8021301a      | 1.91E-02 | 1.71        | up   | RAB27B                                         |
| 7896759a      | 2.22E-03 | 1.55        | up   | LOC643837                                      |
| 8154233a      | 9.02E-03 | 1.94        | down | CD274                                          |
| 8065032a      | 1.88E-03 | 1.80        | down | ESF1                                           |
| 8115147a      | 2.13E-02 | 1.69        | down | CD74                                           |
| 8021001a      | 1.59E-02 | 1.54        | down | KIAA1328                                       |
| 8036302a      | 2.64E-02 | 1.54        | down | LOC100127980                                   |

Complete list of all genes meeting t-test comparison between metal-transformed clones and their control clones with p-value less than or equal to 0.05 and a fold-change cut-off of greater than or equal to 1.50

Supplementary Table 3 Differentially Expressed Genes in Cr-Transformed Clones

| Transcript ID | p-value  | Fold Change | Reg  | Gene Symbol |
|---------------|----------|-------------|------|-------------|
| 8008454a      | 7.31E-03 | 1.81        | down | ABCC3       |
| 8092418a      | 2.88E-04 | 1.72        | up   | ABCC5       |
| 8170704a      | 6.16E-04 | 1.72        | down | ABCD1       |
| 7985809a      | 3.31E-06 | 1.54        | down | ABHD2       |
| 7973306a      | 3.45E-03 | 1.56        | down | ABHD4       |
| 8089145a      | 1.27E-04 | 6.03        | down | ABI3BP      |
| 7936463a      | 5.38E-04 | 2.34        | down | ABLIM1      |
| 7931168a      | 2.43E-04 | 1.62        | up   | ACADSB      |
| 7975602a      | 3.38E-03 | 1.71        | down | ACOT2       |
| 7930498a      | 8.81E-03 | 2.36        | down | ACSL5       |
| 7957386a      | 1.33E-03 | 2.03        | up   | ACSS3       |
| 8045587a      | 2.23E-02 | 1.75        | up   | ACVR2A      |
| 8066431a      | 3.50E-05 | 1.82        | down | ADA         |
| 7936968a      | 7.10E-03 | 2.92        | down | ADAM12      |
| 8146024a      | 5.76E-04 | 2.04        | down | ADAM32      |
| 8069676a      | 6.82E-05 | 28.80       | up   | ADAMTS1     |
| 8100870a      | 6.89E-04 | 2.12        | down | ADAMTS3     |
| 8069689a      | 7.14E-04 | 6.98        | up   | ADAMTS5     |
| 7985522a      | 2.63E-06 | 3.96        | down | ADAMTSL3    |
| 8069178a      | 7.53E-04 | 2.38        | up   | ADARB1      |
| 7930380a      | 3.40E-03 | 1.53        | down | ADD3        |
| 8101844a      | 1.95E-04 | 1.50        | down | ADH5        |
| 8050071a      | 3.34E-04 | 1.72        | down | ADI1        |
| 7938390a      | 7.25E-04 | 2.88        | up   | ADM         |
| 8099259a      | 4.07E-03 | 1.57        | down | AFAP1       |
| 8109120a      | 2.56E-02 | 1.55        | up   | AFAP1L1     |
| 8054254a      | 2.08E-03 | 2.27        | up   | AFF3        |
| 8130628a      | 3.75E-04 | 1.62        | down | AGPAT4      |
| 8083240a      | 5.89E-04 | 2.70        | up   | AGTR1       |
| 7981514a      | 3.72E-04 | 2.75        | down | AHNAK2      |
| 8121277a      | 2.66E-04 | 5.50        | down | AIM1        |
| 7962183a      | 1.05E-05 | 2.52        | up   | AK3L1       |
| 7902452a      | 4.22E-04 | 4.94        | up   | AK5         |
| 7985695a      | 1.32E-05 | 1.68        | down | AKAP13      |
| 7925531a      | 1.95E-04 | 1.55        | down | AKT3        |
| 8001410a      | 6.84E-04 | 1.80        | down | AKTIP       |
| 7986446a      | 1.81E-05 | 4.02        | down | ALDH1A3     |
| 7965979a      | 3.42E-02 | 1.99        | down | ALDH1L2     |
| 8013660a      | 3.21E-02 | 1.81        | up   | ALDOC       |
| 7951467a      | 8.60E-04 | 1.51        | up   | ALKBH8      |
| 7968344a      | 8.45E-06 | 2.22        | down | ALOX5AP     |
| 8049123a      | 6.71E-03 | 1.85        | up   | ALPP        |
| 7962579a      | 1.95E-04 | 3.77        | down | AMIGO2      |
| 8174576a      | 8.26E-03 | 2.35        | up   | AMOT        |
| 8054437a      | 6.74E-03 | 1.51        | up   | ANAPC1      |

| Transcript ID | p-value  | Fold Change | Reg  | Gene Symbol |
|---------------|----------|-------------|------|-------------|
| 8112596a      | 3.63E-03 | 1.64        | down | ANKRA2      |
| 8106931a      | 2.66E-03 | 1.60        | down | ANKRD32     |
| 7943231a      | 8.52E-03 | 1.53        | up   | ANKRD49     |
| 8102720a      | 1.13E-04 | 1.82        | down | ANKRD50     |
| 7957861a      | 1.31E-02 | 1.84        | up   | ANO4        |
| 7991335a      | 2.50E-05 | 2.86        | down | ANPEP       |
| 8095986a      | 9.56E-05 | 3.52        | down | ANXA3       |
| 8047300a      | 2.76E-04 | 3.32        | down | AOX1        |
| 8034084a      | 3.38E-03 | 1.79        | up   | AP1M2       |
| 7982187a      | 1.77E-03 | 3.10        | up   | APBA2       |
| 7926786a      | 1.33E-02 | 2.78        | down | APBB1IP     |
| 8099982a      | 1.03E-05 | 2.51        | down | APBB2       |
| 7984124a      | 1.23E-03 | 1.56        | down | APH1B       |
| 8167998a      | 1.40E-04 | 2.56        | down | AR          |
| 8099760a      | 2.07E-04 | 2.15        | down | ARAP2       |
| 7946201a      | 1.47E-05 | 1.66        | up   | ARFIP2      |
| 8097717a      | 4.61E-04 | 1.56        | down | ARHGAP10    |
| 7933469a      | 9.06E-04 | 1.65        | up   | ARHGAP22    |
| 8096160a      | 2.55E-04 | 2.07        | down | ARHGAP24    |
| 8019964a      | 4.36E-02 | 2.34        | up   | ARHGAP28    |
| 7961532a      | 1.44E-02 | 2.60        | down | ARHGDIB     |
| 8173217a      | 5.62E-05 | 1.70        | down | ARHGEF9     |
| 8112033a      | 3.93E-03 | 1.73        | down | ARL15       |
| 8080926a      | 1.53E-03 | 1.67        | down | ARL6IP5     |
| 8168875a      | 1.30E-04 | 1.70        | down | ARMCX3      |
| 8168958a      | 1.80E-05 | 1.53        | down | ARMCX5      |
| 8113073a      | 2.05E-04 | 3.96        | down | ARRDC3      |
| 7986350a      | 8.35E-03 | 1.57        | up   | ARRDC4      |
| 8171148a      | 1.48E-03 | 1.68        | up   | ARSD        |
| 8106962a      | 1.28E-02 | 1.56        | down | ARSK        |
| 7952341a      | 1.54E-02 | 2.40        | down | ASAM        |
| 8040113a      | 1.65E-03 | 1.52        | down | ASAP2       |
| 8121734a      | 1.29E-03 | 1.52        | down | ASF1A       |
| 7940643a      | 7.49E-03 | 1.63        | up   | ASRGL1      |
| 7993167a      | 3.65E-04 | 2.18        | up   | ATF7IP2     |
| 8106709a      | 8.79E-04 | 2.03        | down | ATG10       |
| 7974270a      | 3.38E-04 | 2.52        | down | ATL1        |
| 7948995a      | 1.13E-04 | 1.55        | down | ATL3        |
| 8043244a      | 9.64E-03 | 1.54        | down | ATOH8       |
| 8094911a      | 1.18E-04 | 1.71        | down | ATP10D      |
| 7907160a      | 2.43E-04 | 1.63        | down | ATP1B1      |
| 8098762a      | 4.16E-04 | 1.61        | down | ATP5I;MYL5  |
| 8170882a      | 1.26E-05 | 1.65        | down | ATP6AP1     |
| 8166805a      | 2.51E-06 | 1.77        | down | ATP6AP2     |
| 8143221a      | 1.42E-02 | 1.62        | up   | ATP6V0A4    |
| 8168472a      | 2.15E-04 | 1.58        | down | ATP7A       |

| Transcript ID | p-value  | Fold Change | Reg  | Gene Symbol       |
|---------------|----------|-------------|------|-------------------|
| 7987369a      | 6.11E-04 | 1.90        | down | ATPBD4            |
| 8173673a      | 1.65E-05 | 2.01        | down | ATRX              |
| 8176276a      | 6.31E-05 | 1.92        | down | ATRX              |
| 8124040a      | 2.15E-03 | 1.78        | down | ATXN1             |
| 7983360a      | 8.45E-06 | 1.90        | down | B2M               |
| 8091780a      | 1.86E-02 | 1.78        | up   | B3GALNT1          |
| 7968370a      | 2.02E-05 | 1.80        | down | B3GALTL           |
| 8084206a      | 4.78E-03 | 3.59        | down | B3GNT5            |
| 7964484a      | 2.20E-02 | 1.50        | down | B4GALNT1;SLC26A10 |
| 7951910a      | 1.25E-02 | 1.77        | down | BACE1             |
| 8069494a      | 9.46E-04 | 1.63        | up   | BAGE2;LOC441666   |
| 8141206a      | 8.35E-03 | 2.13        | up   | BAIAP2L1          |
| 8056060a      | 7.05E-05 | 1.96        | down | BAZ2B             |
| 8001507a      | 2.12E-04 | 1.60        | down | BBS2              |
| 8132218a      | 1.83E-04 | 1.51        | down | BBS9              |
| 7961829a      | 1.07E-03 | 1.63        | up   | BCAT1             |
| 8172088a      | 1.26E-05 | 1.86        | down | BCOR              |
| 7976567a      | 1.02E-03 | 5.71        | down | BDKRB1            |
| 7947230a      | 5.01E-03 | 1.55        | up   | BDNF              |
| 8170648a      | 3.81E-05 | 6.04        | down | BGN               |
| 8077441a      | 1.19E-04 | 2.28        | down | BHLHE40           |
| 7952309a      | 2.42E-04 | 1.75        | down | BLID              |
| 8145055a      | 2.22E-04 | 1.75        | down | BMP1              |
| 8132250a      | 8.63E-04 | 1.59        | up   | BMPER             |
| 8047538a      | 6.26E-05 | 1.62        | down | BMPR2             |
| 8160260a      | 3.64E-02 | 1.51        | down | BNC2              |
| 8171006a      | 9.52E-05 | 1.83        | down | BRCC3             |
| 8017262a      | 3.52E-04 | 1.69        | down | BRIP1             |
| 8173766a      | 5.42E-05 | 1.71        | down | BRWD3             |
| 8094228a      | 4.18E-02 | 1.60        | down | BST1              |
| 8117435a      | 2.83E-04 | 1.86        | down | BTN3A2            |
| 8110606a      | 1.24E-03 | 1.90        | up   | BTNL8             |
| 7928695a      | 8.36E-03 | 2.68        | up   | C10orf58          |
| 7943162a      | 3.22E-04 | 1.84        | up   | C11orf54          |
| 7942783a      | 6.98E-04 | 1.58        | down | C11orf67;INTS4    |
| 7951004a      | 1.25E-03 | 1.88        | up   | C11orf75          |
| 7954398a      | 4.69E-02 | 1.75        | up   | C12orf39          |
| 7964677a      | 1.61E-03 | 1.52        | up   | C12orf66          |
| 7968351a      | 2.02E-06 | 3.63        | down | C13orf33          |
| 7979437a      | 2.13E-03 | 1.54        | down | C14orf149         |
| 7980338a      | 3.40E-04 | 1.55        | down | C14orf4           |
| 7983478a      | 3.03E-03 | 1.59        | down | C15orf48          |
| 7987526a      | 8.31E-05 | 1.59        | down | C15orf57;MRPL42P5 |
| 8002992a      | 2.63E-03 | 1.56        | up   | C16orf46          |
| 7993114a      | 5.83E-04 | 1.51        | up   | C16orf68          |
| 8013515a      | 1.16E-02 | 1.50        | up   | C17orf51          |



| Transcript ID | p-value  | Fold Change | Reg  | Gene Symbol       |
|---------------|----------|-------------|------|-------------------|
| 8007569a      | 1.26E-03 | 1.52        | up   | C17orf53          |
| 8174820a      | 1.96E-03 | 1.53        | down | C1GALT1C1         |
| 7909478a      | 4.93E-05 | 1.56        | down | C1orf107          |
| 8118324a      | 2.07E-02 | 2.38        | down | C2                |
| 8064322a      | 2.43E-04 | 1.85        | down | C20orf96          |
| 8067932a      | 1.82E-02 | 1.87        | down | C21orf34          |
| 8069998a      | 2.03E-04 | 1.50        | up   | C21orf59          |
| 8069574a      | 1.44E-03 | 1.85        | down | C21orf91          |
| 8053248a      | 6.22E-05 | 3.47        | up   | C2orf65           |
| 8033257a      | 3.31E-02 | 1.86        | down | C3                |
| 8080847a      | 7.96E-03 | 3.09        | down | C3orf14           |
| 8091629a      | 4.91E-04 | 1.60        | up   | C3orf33           |
| 8083223a      | 2.47E-04 | 2.36        | up   | C3orf58           |
| 8088680a      | 1.07E-03 | 1.90        | down | C3orf64           |
| 8103684a      | 1.84E-04 | 1.61        | down | C4orf27           |
| 8097373a      | 4.95E-05 | 1.61        | down | C4orf29           |
| 8097435a      | 1.50E-03 | 1.72        | down | C4orf33           |
| 8098512a      | 8.01E-05 | 1.54        | down | C4orf41           |
| 7991777a      | 5.37E-05 | 1.52        | down | C4orf46           |
| 8102831a      | 9.58E-03 | 1.81        | down | C4orf49           |
| 8099193a      | 1.01E-02 | 1.58        | up   | C4orf50           |
| 8113504a      | 2.22E-04 | 3.41        | down | C5orf13           |
| 8104680a      | 2.39E-03 | 1.64        | up   | C5orf22           |
| 8104758a      | 1.06E-05 | 22.72       | down | C5orf23           |
| 8110147a      | 3.26E-05 | 3.95        | up   | C5orf25           |
| 8105647a      | 2.24E-03 | 1.54        | down | C5orf44           |
| 8123678a      | 8.45E-06 | 1.77        | down | C6orf145          |
| 8129392a      | 2.09E-03 | 2.29        | down | C6orf174;KIAA0408 |
| 8135734a      | 1.02E-05 | 1.77        | down | C7orf58           |
| 8134051a      | 1.56E-03 | 1.72        | up   | C7orf63           |
| 8156571a      | 7.69E-04 | 1.83        | down | C9orf3            |
| 8156573a      | 5.25E-04 | 1.60        | down | C9orf3            |
| 8164008a      | 4.11E-03 | 1.64        | up   | C9orf45           |
| 8157144a      | 5.53E-03 | 1.76        | up   | C9orf6;IKBKAP     |
| 8140579a      | 3.73E-03 | 2.86        | up   | CACNA2D1          |
| 7955142a      | 2.95E-05 | 1.68        | down | CACNB3            |
| 8009334a      | 4.66E-05 | 3.71        | down | CACNG4            |
| 8040843a      | 4.87E-05 | 1.57        | up   | CAD               |
| 7906417a      | 1.61E-03 | 2.13        | down | CADM3             |
| 8037363a      | 1.89E-03 | 1.70        | up   | CADM4             |
| 7926223a      | 1.47E-05 | 2.41        | down | CAMK1D            |
| 8111506a      | 2.40E-02 | 1.59        | up   | CAPSL             |
| 8137874a      | 3.39E-03 | 2.19        | up   | CARD11            |
| 7951408a      | 1.62E-04 | 2.51        | down | CARD16            |
| 7945803a      | 3.31E-03 | 1.53        | up   | CARS              |
| 8172158a      | 6.74E-05 | 1.75        | down | CASK              |

| Transcript ID | p-value  | Fold Change | Reg  | Gene Symbol    |
|---------------|----------|-------------|------|----------------|
| 7951372a      | 2.83E-04 | 2.74        | up   | CASP4          |
| 8135587a      | 6.36E-04 | 1.55        | down | CAV2           |
| 8068401a      | 2.85E-04 | 1.50        | up   | CBR1           |
| 8103622a      | 2.39E-03 | 1.66        | down | CBR4           |
| 8094190a      | 1.47E-02 | 1.52        | down | CC2D2A         |
| 8098556a      | 6.20E-04 | 1.72        | down | CCDC111;MLF1IP |
| 8113602a      | 2.09E-04 | 1.69        | up   | CCDC112        |
| 7996198a      | 3.07E-04 | 2.77        | up   | CCDC113        |
| 8177628a      | 4.82E-03 | 1.52        | down | CCDC125        |
| 7944913a      | 2.81E-04 | 1.65        | down | CCDC15         |
| 8016088a      | 5.85E-04 | 1.70        | up   | CCDC43         |
| 8023401a      | 5.44E-03 | 2.12        | down | CCDC68         |
| 7899346a      | 9.75E-03 | 1.83        | down | CCDC72         |
| 8037762a      | 7.36E-03 | 1.53        | up   | CCDC8          |
| 7980828a      | 1.65E-02 | 2.23        | up   | CCDC88C        |
| 8006433a      | 8.88E-03 | 2.29        | down | CCL2           |
| 7942123a      | 3.19E-03 | 2.03        | up   | CCND1;FLJ42258 |
| 7989037a      | 6.50E-05 | 1.96        | down | CCPG1;DYX1C1   |
| 8120719a      | 5.32E-04 | 2.63        | down | CD109          |
| 8081657a      | 2.09E-04 | 2.98        | down | CD200          |
| 8177222a      | 4.00E-03 | 7.59        | down | CD24           |
| 8004510a      | 2.66E-02 | 1.55        | up   | CD68           |
| 8115147a      | 7.43E-04 | 1.61        | down | CD74           |
| 7939546a      | 2.36E-05 | 2.22        | up   | CD82           |
| 7924773a      | 2.09E-03 | 1.61        | down | CDC42BPA       |
| 8138489a      | 1.53E-04 | 1.81        | up   | CDC47L         |
| 8086517a      | 1.19E-02 | 1.56        | up   | CDCP1          |
| 8081838a      | 6.66E-03 | 2.13        | down | CDGAP          |
| 8111255a      | 8.13E-03 | 2.28        | up   | CDH10          |
| 8001800a      | 2.21E-02 | 2.55        | up   | CDH11          |
| 8063796a      | 4.40E-02 | 1.76        | down | CDH4           |
| 8104663a      | 2.79E-04 | 5.41        | up   | CDH6           |
| 7997982a      | 1.69E-05 | 1.63        | up   | CDK10          |
| 8101031a      | 2.64E-03 | 1.63        | down | CDKL2          |
| 7901363a      | 3.83E-04 | 1.62        | down | CDKN2C         |
| 7997839a      | 4.30E-05 | 1.57        | up   | CDT1           |
| 8002975a      | 2.24E-02 | 1.51        | down | CDYL2          |
| 8071086a      | 3.61E-02 | 1.58        | up   | CECR2          |
| 8100603a      | 9.20E-05 | 1.55        | down | CENPC1         |
| 8102076a      | 1.13E-04 | 1.58        | down | CENPE          |
| 8168794a      | 3.04E-05 | 1.54        | down | CENPI          |
| 8112376a      | 6.05E-04 | 1.63        | down | CENPK          |
| 7943297a      | 1.05E-04 | 1.84        | up   | CEP57          |
| 8175755a      | 2.20E-05 | 1.53        | down | CETN2          |
| 8113050a      | 9.01E-03 | 1.67        | down | CETN3          |
| 8002865a      | 6.82E-03 | 1.59        | down | CFDP1;C17orf60 |

| Transcript ID | p-value  | Fold Change | Reg  | Gene Symbol    |
|---------------|----------|-------------|------|----------------|
| 7995583a      | 6.98E-04 | 1.74        | down | CHD9           |
| 8100382a      | 4.46E-04 | 1.79        | down | CHIC2          |
| 8147057a      | 1.05E-04 | 1.66        | up   | CHMP4C         |
| 7950983a      | 4.15E-05 | 2.27        | up   | CHORDC1        |
| 8174513a      | 3.37E-05 | 14.29       | up   | CHRD1          |
| 7910915a      | 2.71E-04 | 5.19        | up   | CHRM3          |
| 8054297a      | 2.24E-03 | 1.85        | up   | CHST10         |
| 7958202a      | 3.59E-03 | 2.37        | down | CHST11         |
| 8083214a      | 2.63E-06 | 4.24        | up   | CHST2          |
| 7928291a      | 3.76E-04 | 1.52        | down | CHST3          |
| 7990674a      | 6.05E-04 | 1.57        | down | CIB2           |
| 8165974a      | 8.23E-03 | 1.53        | up   | CLCN4          |
| 8092726a      | 1.26E-03 | 2.50        | up   | CLDN1          |
| 8102877a      | 2.45E-02 | 2.49        | up   | CLGN           |
| 8165334a      | 3.05E-02 | 2.00        | up   | CLIC3          |
| 7981142a      | 1.57E-03 | 1.76        | down | CLMN           |
| 7969488a      | 2.90E-03 | 1.58        | down | CLN5           |
| 8144279a      | 1.80E-03 | 1.52        | down | CLN8           |
| 8149927a      | 2.77E-04 | 2.06        | down | CLU            |
| 7996318a      | 2.18E-04 | 1.59        | down | CMTM3          |
| 8166355a      | 2.20E-03 | 2.76        | up   | CNKSR2         |
| 7929732a      | 2.20E-05 | 3.04        | up   | CNNM1          |
| 8007272a      | 8.10E-03 | 1.55        | up   | COASY          |
| 8056343a      | 2.27E-03 | 2.34        | up   | COBLL1         |
| 8127563a      | 2.36E-03 | 2.21        | up   | COL12A1        |
| 7972750a      | 4.61E-05 | 2.27        | down | COL4A1         |
| 7970033a      | 1.51E-03 | 1.52        | down | COL4A2;STK24   |
| 8169294a      | 7.48E-05 | 1.50        | down | COL4A5         |
| 8159142a      | 1.27E-04 | 1.78        | down | COL5A1         |
| 8057620a      | 8.45E-06 | 18.80       | down | COL5A2         |
| 8081235a      | 2.14E-04 | 2.39        | down | COL8A1         |
| 7926596a      | 3.82E-04 | 1.70        | down | COMMD3;BMI1    |
| 7984475a      | 5.67E-04 | 2.65        | down | CORO2B         |
| 8089795a      | 4.96E-03 | 1.51        | down | COX17          |
| 8168470a      | 2.48E-03 | 1.66        | down | COX7B          |
| 8098204a      | 1.27E-05 | 4.19        | down | CPE            |
| 8094169a      | 2.77E-05 | 2.58        | down | CPEB2          |
| 7995976a      | 6.91E-05 | 2.04        | down | CPNE2          |
| 7962250a      | 2.28E-02 | 1.75        | down | CPNE8          |
| 7977397a      | 1.34E-03 | 1.82        | down | CRIP2          |
| 7997642a      | 2.33E-05 | 4.40        | down | CRISPLD2       |
| 8078650a      | 2.57E-03 | 1.60        | down | CTDSPL         |
| 7945663a      | 3.50E-05 | 3.17        | down | CTSD;LOC402778 |
| 7919800a      | 5.89E-05 | 1.85        | down | CTSS           |
| 7943580a      | 6.58E-05 | 1.53        | up   | CUL5           |
| 7936798a      | 2.91E-02 | 1.56        | down | CUZD1          |

| Transcript ID | p-value  | Fold Change | Reg  | Gene Symbol                        |
|---------------|----------|-------------|------|------------------------------------|
| 8095697a      | 3.28E-04 | 1.79        | down | CXCL1                              |
| 8011713a      | 9.24E-03 | 1.78        | up   | CXCL16                             |
| 8166230a      | 2.93E-05 | 1.83        | up   | CXorf15                            |
| 8172110a      | 1.38E-04 | 1.55        | down | CXorf38                            |
| 8175642a      | 8.51E-05 | 1.73        | down | CXorf40B                           |
| 8108447a      | 1.07E-02 | 1.63        | down | CXXC5                              |
| 8004694a      | 1.58E-05 | 1.82        | up   | CYB5D1                             |
| 8003322a      | 1.30E-02 | 1.56        | up   | CYBA                               |
| 8109528a      | 9.48E-05 | 3.52        | up   | CYFIP2                             |
| 8176698a      | 1.72E-05 | 6.49        | down | CYorf15A                           |
| 8176709a      | 1.82E-05 | 4.75        | down | CYorf15B                           |
| 8051583a      | 1.12E-02 | 4.62        | down | CYP1B1                             |
| 8054967a      | 1.81E-04 | 1.98        | down | CYP27C1                            |
| 7946742a      | 1.14E-03 | 3.53        | down | CYP2R1                             |
| 8005661a      | 1.17E-03 | 1.53        | down | CYTSB                              |
| 7974697a      | 2.09E-04 | 1.80        | down | DAAM1                              |
| 7974689a      | 2.37E-03 | 1.54        | down | DACT1                              |
| 8110982a      | 4.07E-03 | 1.58        | up   | DAP                                |
| 8016159a      | 9.46E-04 | 2.03        | up   | DCAKD                              |
| 8121685a      | 8.15E-04 | 1.86        | down | DCBLD1                             |
| 7945101a      | 1.51E-04 | 1.56        | down | DCPS                               |
| 8145660a      | 1.44E-04 | 1.56        | down | DCTN6                              |
| 8095009a      | 3.70E-04 | 1.57        | down | DCUN1D4                            |
| 7953844a      | 1.29E-03 | 1.77        | up   | DDX12;DDX11;LOC642846;LOC100134008 |
| 8170027a      | 1.05E-04 | 1.97        | down | DDX26B                             |
| 8176624a      | 2.61E-04 | 23.67       | down | DDX3Y                              |
| 8103563a      | 1.37E-04 | 2.14        | down | DDX60                              |
| 8103601a      | 3.75E-04 | 2.13        | down | DDX60L                             |
| 7918487a      | 1.22E-02 | 1.67        | up   | DENND2D                            |
| 8148476a      | 8.45E-06 | 2.59        | down | DENND3                             |
| 8148059a      | 2.45E-03 | 1.92        | up   | DEPDC6                             |
| 8138602a      | 5.32E-03 | 1.52        | down | DFNA5                              |
| 7968800a      | 7.24E-06 | 1.78        | down | DGKH                               |
| 8143154a      | 6.08E-04 | 4.09        | down | DGKI;DGKi                          |
| 7978260a      | 2.15E-03 | 1.64        | down | DHRS1                              |
| 8168691a      | 2.05E-03 | 2.13        | down | DIAPH2                             |
| 7971866a      | 4.29E-04 | 1.66        | down | DIAPH3                             |
| 7931683a      | 6.98E-04 | 2.74        | up   | DIP2C                              |
| 7927631a      | 7.41E-06 | 2.42        | up   | DKK1                               |
| 7988789a      | 1.28E-03 | 1.53        | down | DMXL2                              |
| 8154962a      | 2.01E-05 | 1.60        | down | DNAJB5                             |
| 8137627a      | 1.16E-04 | 1.62        | up   | DNAJB6;TMEM135                     |
| 7968872a      | 4.27E-03 | 1.52        | down | DNAJC15                            |
| 8015490a      | 3.74E-03 | 1.53        | up   | DNAJC7;CNP                         |
| 8176076a      | 3.28E-04 | 1.75        | down | DNASE1L1                           |
| 8059580a      | 1.76E-03 | 5.59        | down | DNER                               |

| Transcript ID | p-value  | Fold Change | Reg  | Gene Symbol |
|---------------|----------|-------------|------|-------------|
| 8059413a      | 2.23E-04 | 4.32        | down | DOCK10      |
| 8142345a      | 1.90E-02 | 2.04        | down | DOCK4       |
| 8145365a      | 6.59E-04 | 1.73        | down | DOCK5       |
| 7953665a      | 1.70E-02 | 1.59        | down | DPPA3       |
| 8027448a      | 3.04E-05 | 1.52        | down | DPY19L3     |
| 7917912a      | 1.80E-04 | 1.98        | up   | DPYD        |
| 8022711a      | 4.53E-04 | 8.38        | up   | DSC2        |
| 8022692a      | 1.29E-04 | 34.96       | up   | DSC3        |
| 8116780a      | 4.16E-03 | 2.83        | down | DSP         |
| 8020847a      | 8.66E-04 | 2.53        | down | DTNA        |
| 7924450a      | 2.54E-02 | 1.69        | up   | DUSP10      |
| 7961371a      | 7.86E-04 | 1.60        | down | DUSP16      |
| 8053882a      | 3.71E-04 | 1.61        | up   | DUSP2       |
| 8150076a      | 3.00E-02 | 1.66        | down | DUSP4       |
| 7910379a      | 1.41E-02 | 1.60        | up   | DUSP5P      |
| 8130499a      | 6.82E-04 | 1.63        | down | DYNLT1      |
| 8172035a      | 4.93E-05 | 1.61        | down | DYNLT3      |
| 8042637a      | 8.54E-05 | 2.92        | down | DYSF        |
| 8147101a      | 2.43E-02 | 1.93        | up   | E2F5        |
| 8116921a      | 1.89E-02 | 1.78        | down | EDN1        |
| 7960365a      | 2.59E-03 | 2.22        | up   | EFCAB4B     |
| 7960370a      | 7.84E-04 | 2.08        | up   | EFCAB4B     |
| 7949503a      | 1.27E-02 | 1.53        | down | EFEMP2      |
| 8049187a      | 5.48E-03 | 1.56        | up   | EFHD1       |
| 7978544a      | 6.36E-03 | 1.62        | up   | EGLN3       |
| 8176719a      | 4.54E-04 | 19.76       | down | EIF1AY      |
| 7938263a      | 5.16E-04 | 1.51        | up   | EIF3F       |
| 8088803a      | 3.88E-03 | 1.71        | down | EIF4E3      |
| 8012856a      | 4.93E-05 | 1.54        | up   | ELAC2       |
| 8160459a      | 4.91E-05 | 4.45        | up   | ELAVL2      |
| 8102817a      | 5.65E-06 | 1.61        | down | ELF2        |
| 8123920a      | 8.31E-05 | 1.85        | up   | ELOVL2      |
| 8127767a      | 2.31E-02 | 1.94        | up   | ELOVL4      |
| 8112274a      | 8.72E-05 | 5.49        | up   | ELOVL7      |
| 8112007a      | 2.22E-03 | 1.68        | down | EMB         |
| 8170850a      | 2.02E-05 | 1.62        | down | EMD         |
| 7976698a      | 8.51E-05 | 2.35        | down | EML1        |
| 7999387a      | 7.50E-04 | 1.67        | up   | EMP2        |
| 7924619a      | 1.52E-04 | 1.88        | down | ENAH        |
| 8152522a      | 4.39E-04 | 2.86        | down | ENPP2       |
| 8120061a      | 3.26E-04 | 1.94        | up   | ENPP4       |
| 8149793a      | 5.22E-04 | 1.67        | down | ENTPD4      |
| 7980080a      | 1.45E-02 | 1.52        | down | ENTPD5      |
| 7899534a      | 9.65E-04 | 1.62        | up   | EPB41       |
| 8044882a      | 8.23E-03 | 1.61        | up   | EPB41L5     |
| 8098439a      | 5.30E-03 | 3.41        | up   | EPCAM       |

| Transcript ID | p-value  | Fold Change | Reg  | Gene Symbol                             |
|---------------|----------|-------------|------|-----------------------------------------|
| 8095723a      | 1.40E-04 | 5.15        | down | EPGN                                    |
| 8059279a      | 1.31E-04 | 7.04        | up   | EPHA4                                   |
| 7898809a      | 2.31E-02 | 1.64        | down | EPHB2                                   |
| 7971296a      | 1.99E-04 | 2.20        | down | EPST1                                   |
| 8113250a      | 1.19E-03 | 2.29        | down | ERAP1                                   |
| 8107044a      | 1.62E-04 | 3.25        | down | ERAP2                                   |
| 7993298a      | 2.89E-05 | 1.67        | up   | ERCC4                                   |
| 8095728a      | 1.31E-06 | 4.67        | down | EREG                                    |
| 8159992a      | 4.28E-02 | 1.52        | up   | ERMP1                                   |
| 8037322a      | 4.63E-03 | 1.51        | down | ETHE1                                   |
| 8138289a      | 5.94E-05 | 1.93        | up   | ETV1                                    |
| 8015806a      | 7.52E-04 | 2.11        | up   | ETV4                                    |
| 8092578a      | 2.28E-03 | 1.91        | up   | ETV5                                    |
| 8158714a      | 6.65E-04 | 1.54        | up   | EXOSC2                                  |
| 7968658a      | 7.60E-04 | 1.57        | down | EXOSC8;FAM48A                           |
| 7951545a      | 1.47E-02 | 1.87        | up   | EXPH5                                   |
| 8151310a      | 2.55E-04 | 5.25        | down | EYA1                                    |
| 8063187a      | 1.26E-05 | 4.15        | down | EYA2                                    |
| 8122150a      | 9.60E-04 | 13.24       | down | EYA4                                    |
| 8106403a      | 2.41E-03 | 2.20        | down | F2RL1                                   |
| 8170998a      | 1.41E-03 | 1.76        | down | F8A1;F8A2;F8A3                          |
| 7940565a      | 1.43E-02 | 1.52        | up   | FADS2                                   |
| 7985488a      | 2.23E-03 | 1.51        | down | FAM103A1                                |
| 8104570a      | 2.11E-03 | 2.42        | up   | FAM105A                                 |
| 8146533a      | 2.71E-04 | 2.17        | up   | FAM110B                                 |
| 8173041a      | 2.12E-03 | 2.21        | down | FAM120C                                 |
| 8157905a      | 7.55E-04 | 1.60        | up   | FAM125B                                 |
| 7922846a      | 6.33E-03 | 1.75        | up   | FAM129A                                 |
| 8111136a      | 2.48E-03 | 1.80        | up   | FAM134B                                 |
| 8015655a      | 4.21E-03 | 1.52        | up   | FAM134C                                 |
| 7928354a      | 1.81E-04 | 1.65        | down | FAM149B1                                |
| 8097801a      | 4.17E-03 | 2.45        | down | FAM160A1                                |
| 8149324a      | 2.37E-05 | 1.85        | up   | FAM167A                                 |
| 8112649a      | 1.06E-02 | 1.85        | up   | FAM169A                                 |
| 8046895a      | 2.54E-03 | 2.31        | up   | FAM171B                                 |
| 8113083a      | 1.47E-05 | 2.26        | down | FAM172A                                 |
| 8101489a      | 5.55E-03 | 1.73        | down | FAM175A                                 |
| 7973918a      | 1.94E-03 | 1.68        | down | FAM177A1                                |
| 8001537a      | 6.24E-04 | 1.52        | down | FAM192A                                 |
| 8176117a      | 7.88E-05 | 1.62        | down | FAM3A                                   |
| 8170906a      | 1.17E-04 | 1.53        | down | FAM50A                                  |
| 8156253a      | 2.68E-03 | 2.36        | up   | FAM75A7;FAM75C1;FAM75A2;FAM75A6;FAM75A1 |
| 8152812a      | 1.86E-03 | 1.51        | up   | FAM84B                                  |
| 8003503a      | 3.12E-05 | 1.65        | up   | FANCA;ZNF276                            |
| 8056257a      | 7.12E-05 | 3.93        | down | FAP                                     |
| 7954631a      | 7.31E-03 | 2.95        | up   | FAR2                                    |

| Transcript ID | p-value  | Fold Change | Reg  | Gene Symbol     |
|---------------|----------|-------------|------|-----------------|
| 8110920a      | 2.67E-03 | 1.68        | up   | FASTKD3         |
| 8104079a      | 3.31E-04 | 1.51        | down | FAT1            |
| 8097288a      | 1.11E-04 | 2.95        | down | FAT4            |
| 7898263a      | 1.18E-04 | 1.67        | down | FBLIM1          |
| 8073775a      | 1.12E-03 | 2.59        | down | FBLN1           |
| 7988467a      | 7.75E-05 | 1.94        | down | FBN1            |
| 8113800a      | 4.91E-03 | 1.61        | up   | FBN2            |
| 8078461a      | 4.12E-04 | 2.15        | down | FBXL2           |
| 8099449a      | 5.33E-05 | 1.60        | down | FBXL5           |
| 7985053a      | 3.04E-05 | 1.52        | down | FBXO22;FBXO22OS |
| 8152703a      | 4.78E-06 | 3.90        | down | FBXO32          |
| 7951654a      | 1.13E-04 | 1.76        | up   | FDXACB1;ALG9    |
| 8064904a      | 7.98E-03 | 2.90        | up   | FERMT1          |
| 7954729a      | 3.89E-05 | 2.00        | down | FGD4            |
| 7965541a      | 2.98E-03 | 1.59        | down | FGD6            |
| 8097829a      | 1.84E-02 | 2.22        | down | FHDC1           |
| 8170119a      | 3.99E-06 | 2.79        | down | FHL1            |
| 8020973a      | 8.88E-03 | 1.61        | up   | FHOD3           |
| 8056323a      | 2.83E-05 | 1.78        | down | FIGN            |
| 7945132a      | 1.68E-03 | 2.13        | down | FLI1;EWSR1      |
| 7917942a      | 1.10E-03 | 1.98        | up   | FLJ35409        |
| 8113796a      | 1.48E-03 | 2.13        | down | FLJ44606        |
| 8176026a      | 2.00E-04 | 1.54        | down | FLNA            |
| 8135990a      | 8.57E-06 | 2.23        | up   | FLNC            |
| 7987145a      | 2.72E-02 | 1.86        | down | FMN1            |
| 7910923a      | 1.90E-02 | 1.88        | up   | FMN2            |
| 8170326a      | 1.72E-05 | 1.68        | down | FMR1            |
| 8098103a      | 6.05E-04 | 1.54        | down | FNIP2           |
| 7973745a      | 4.00E-05 | 1.73        | up   | FOXG1           |
| 8088776a      | 1.44E-04 | 2.67        | down | FOXP1           |
| 8098714a      | 5.32E-05 | 1.57        | down | FRG1            |
| 7988260a      | 5.86E-03 | 1.92        | down | FRMD5           |
| 7917954a      | 2.85E-02 | 1.79        | up   | FRRS1           |
| 8023995a      | 1.40E-04 | 2.11        | down | FSTL3           |
| 8171001a      | 2.03E-05 | 1.77        | down | FUNDC2          |
| 8147766a      | 3.56E-04 | 1.83        | up   | FZD6            |
| 7909441a      | 5.00E-02 | 1.73        | up   | GOS2            |
| 8097586a      | 5.30E-05 | 1.67        | down | GAB1            |
| 8176163a      | 3.53E-06 | 2.25        | down | GAB3            |
| 8175683a      | 9.24E-05 | 2.43        | down | GABRE           |
| 8175666a      | 1.62E-03 | 2.04        | down | GABRE           |
| 7942064a      | 1.15E-02 | 1.53        | up   | GAL             |
| 7980580a      | 3.09E-03 | 2.56        | down | GALC            |
| 8020903a      | 2.72E-02 | 1.60        | up   | GALNT1          |
| 8109426a      | 5.32E-05 | 2.13        | down | GALNT10         |
| 8109407a      | 5.76E-05 | 2.12        | down | GALNT10         |

| Transcript ID | p-value  | Fold Change | Reg  | Gene Symbol         |
|---------------|----------|-------------|------|---------------------|
| 8045776a      | 1.75E-03 | 4.38        | up   | GALNT13             |
| 8051298a      | 3.77E-02 | 1.61        | up   | GALNT14             |
| 7910427a      | 4.16E-04 | 1.50        | down | GALNT2              |
| 8056408a      | 1.45E-02 | 4.56        | up   | GALNT3              |
| 8045835a      | 1.46E-04 | 2.21        | down | GALNT5              |
| 7963313a      | 3.21E-03 | 2.23        | up   | GALNT6              |
| 8098328a      | 1.04E-03 | 1.74        | down | GALNT7              |
| 7946641a      | 3.73E-03 | 1.52        | up   | GALNTL4             |
| 7997414a      | 1.02E-05 | 1.77        | up   | GAN                 |
| 7970329a      | 1.17E-02 | 1.57        | down | GAS6                |
| 7998103a      | 4.90E-04 | 1.60        | up   | GAS8;LOC100130015   |
| 8090469a      | 1.36E-05 | 1.69        | up   | GATA2               |
| 7917516a      | 7.61E-04 | 1.94        | down | GBP1;GBP3;LOC400759 |
| 8116835a      | 6.77E-03 | 1.66        | down | GCNT2               |
| 8151906a      | 8.63E-03 | 1.72        | up   | GDF6                |
| 8170891a      | 3.50E-05 | 1.74        | down | GDI1                |
| 8111670a      | 7.12E-05 | 2.91        | up   | GDNF                |
| 8151816a      | 2.20E-03 | 1.63        | down | GEM                 |
| 8115410a      | 1.67E-05 | 1.50        | up   | GEMIN5              |
| 8116418a      | 7.05E-05 | 2.95        | down | GFPT2               |
| 7936494a      | 7.78E-04 | 3.67        | up   | GFRA1               |
| 7919340a      | 2.90E-02 | 2.08        | up   | GJA5                |
| 7984517a      | 1.78E-04 | 1.81        | down | GLCE                |
| 8160024a      | 1.78E-03 | 2.18        | up   | GLDC                |
| 8139212a      | 2.55E-04 | 1.62        | down | GLI3                |
| 7957260a      | 6.65E-04 | 1.65        | down | GLIPR1;KRR1         |
| 8155192a      | 1.11E-04 | 2.22        | down | GLIPR2              |
| 8159900a      | 9.64E-04 | 2.06        | down | GLIS3               |
| 8098006a      | 5.42E-05 | 2.06        | down | GLRB                |
| 8113214a      | 3.33E-02 | 1.52        | down | GLRX                |
| 8080964a      | 1.77E-02 | 1.78        | down | GLT8D4              |
| 8117034a      | 1.03E-02 | 1.74        | up   | GMPR                |
| 8071671a      | 4.22E-04 | 1.53        | up   | GNAZ                |
| 8100085a      | 6.30E-04 | 1.66        | down | GNPDA2              |
| 8007904a      | 7.46E-04 | 1.75        | up   | GOSR2               |
| 7935627a      | 4.77E-05 | 1.68        | up   | GOT1                |
| 7969613a      | 1.72E-02 | 1.62        | down | GPC6                |
| 8122365a      | 4.67E-04 | 1.63        | down | GPR126              |
| 7974372a      | 4.81E-04 | 2.45        | down | GPR137C             |
| 8083839a      | 2.92E-03 | 2.53        | up   | GPR160              |
| 7987439a      | 2.63E-04 | 2.27        | down | GPR176              |
| 8045336a      | 7.63E-03 | 1.58        | down | GPR39;LYPD1         |
| 7996081a      | 7.15E-03 | 1.97        | down | GPR56               |
| 8128316a      | 7.87E-04 | 2.01        | up   | GPR63               |
| 8168968a      | 5.62E-05 | 1.58        | down | GPRASP1             |
| 7995362a      | 1.05E-03 | 1.50        | up   | GPT2                |



| Transcript ID | p-value  | Fold Change | Reg  | Gene Symbol                                 |
|---------------|----------|-------------|------|---------------------------------------------|
| 8139656a      | 1.52E-04 | 1.78        | down | GRB10                                       |
| 7964759a      | 5.15E-05 | 2.11        | up   | GRIP1                                       |
| 8127094a      | 2.20E-03 | 1.98        | down | GSTA4                                       |
| 8140170a      | 4.78E-05 | 1.76        | down | GTF2IRD2;GTF2IRD2B;GTF2IRD2P                |
| 8171079a      | 2.95E-05 | 1.51        | up   | GTPBP6                                      |
| 8046906a      | 2.81E-03 | 6.01        | up   | GULP1                                       |
| 8045009a      | 1.52E-05 | 2.36        | down | GYPC                                        |
| 8072926a      | 2.36E-03 | 1.59        | down | H1FO                                        |
| 7928107a      | 3.50E-04 | 3.79        | down | H2AFY2                                      |
| 8152617a      | 3.87E-03 | 5.68        | up   | HAS2                                        |
| 7977841a      | 5.28E-04 | 1.68        | down | HAUS4                                       |
| 8175782a      | 2.00E-04 | 1.61        | down | HAUS7;TREX2                                 |
| 8114572a      | 1.05E-03 | 2.30        | down | HBEGF                                       |
| 8118093a      | 5.32E-03 | 2.03        | down | HCG27                                       |
| 8089911a      | 2.89E-05 | 2.43        | down | HCLS1                                       |
| 8118111a      | 1.52E-02 | 1.56        | down | HCP5                                        |
| 8122317a      | 1.26E-04 | 1.56        | down | HEBP2                                       |
| 8096385a      | 2.00E-04 | 1.59        | down | HERC3                                       |
| 8096361a      | 1.65E-05 | 3.63        | up   | HERC5                                       |
| 8097628a      | 1.51E-05 | 16.69       | down | HHIP                                        |
| 8124430a      | 1.38E-03 | 1.57        | down | HIST1H1D                                    |
| 8124394a      | 1.46E-02 | 3.12        | down | HIST1H2BB                                   |
| 8124492a      | 4.46E-02 | 1.84        | up   | HIST1H2BK                                   |
| 8117594a      | 3.73E-03 | 2.32        | down | HIST1H2BM                                   |
| 8124537a      | 1.05E-04 | 2.63        | down | HIST1H3J                                    |
| 8117422a      | 3.67E-03 | 4.13        | down | HIST1H4F                                    |
| 7919642a      | 6.98E-04 | 1.51        | down | HIST2H2AB                                   |
| 8116910a      | 2.32E-04 | 1.55        | down | HIVEP1                                      |
| 8042942a      | 1.83E-04 | 1.88        | up   | HK2                                         |
| 8179519a      | 3.15E-04 | 1.80        | up   | HLA-DPB1                                    |
| 8118564a      | 1.49E-02 | 1.81        | up   | HLA-DQA2;HLA-DQA1;LOC100294317;LOC100294224 |
| 8117760a      | 1.46E-02 | 1.64        | down | HLA-F                                       |
| 8008588a      | 4.23E-03 | 2.47        | down | HLF                                         |
| 8170468a      | 1.27E-04 | 1.59        | down | HMGB3                                       |
| 8106280a      | 6.91E-04 | 1.54        | down | HMGCR                                       |
| 8117510a      | 8.94E-06 | 1.60        | down | HMGN4                                       |
| 8112841a      | 6.11E-03 | 4.57        | up   | HOMER1                                      |
| 8138765a      | 2.01E-05 | 1.53        | up   | HOXA11                                      |
| 8016438a      | 2.05E-04 | 1.89        | down | HOXB2                                       |
| 7955887a      | 8.69E-03 | 1.64        | up   | HOXC5                                       |
| 7955873a      | 8.19E-04 | 1.74        | up   | HOXC6;HOXC4;HOXC5                           |
| 7955869a      | 2.01E-05 | 2.79        | up   | HOXC8                                       |
| 7955865a      | 8.42E-04 | 1.73        | up   | HOXC9                                       |
| 8101449a      | 3.51E-04 | 2.21        | down | HPSE                                        |
| 8077851a      | 6.09E-04 | 1.72        | down | HRH1                                        |
| 7898677a      | 4.38E-04 | 1.98        | up   | HS6ST1                                      |

| Transcript ID | p-value  | Fold Change | Reg  | Gene Symbol   |
|---------------|----------|-------------|------|---------------|
| 7936516a      | 1.31E-06 | 2.84        | up   | HSPA12A       |
| 7975076a      | 1.45E-03 | 2.11        | down | HSPA2         |
| 8097335a      | 4.92E-04 | 1.64        | up   | HSPA4L        |
| 7913450a      | 1.22E-03 | 1.54        | down | HSPG2;LDLRAD2 |
| 7931097a      | 3.67E-03 | 1.63        | down | HTRA1         |
| 8040163a      | 1.47E-05 | 1.84        | down | IAH1          |
| 8070720a      | 3.25E-03 | 1.73        | up   | ICOSLG        |
| 8061564a      | 2.68E-04 | 2.66        | down | ID1           |
| 8040103a      | 6.14E-03 | 2.65        | up   | ID2           |
| 7991374a      | 1.51E-04 | 2.61        | down | IDH2          |
| 8175844a      | 5.37E-05 | 1.56        | down | IDH3G         |
| 8175593a      | 1.49E-04 | 2.05        | down | IDS           |
| 8170390a      | 9.13E-04 | 1.83        | down | IDS;LOC727913 |
| 7912994a      | 8.19E-04 | 1.78        | down | IFFO2         |
| 8160435a      | 3.72E-04 | 2.33        | down | IFNE          |
| 7958620a      | 2.26E-03 | 1.51        | down | IFT81         |
| 8008151a      | 5.75E-04 | 1.69        | up   | IGF2BP1       |
| 8007100a      | 1.82E-03 | 2.45        | down | IGFBP4        |
| 8100541a      | 6.22E-05 | 2.07        | down | IGFBP7;POLR2B |
| 8029779a      | 1.40E-06 | 5.62        | down | IGFL1         |
| 7981722a      | 4.15E-02 | 2.25        | up   | IGHA1;IGHG1   |
| 8039484a      | 1.39E-02 | 1.56        | down | IL11          |
| 8169580a      | 5.16E-03 | 1.69        | down | IL13RA1       |
| 8043995a      | 3.24E-04 | 2.47        | down | IL1R1         |
| 8084794a      | 7.05E-05 | 1.73        | down | IL1RAP        |
| 7992828a      | 3.20E-03 | 1.88        | down | IL32          |
| 8104901a      | 9.17E-04 | 3.23        | up   | IL7R          |
| 8095680a      | 1.75E-02 | 1.77        | down | IL8           |
| 8044927a      | 7.89E-03 | 1.51        | up   | INHBB         |
| 8102950a      | 2.83E-05 | 2.41        | down | INPP4B        |
| 8137526a      | 6.31E-05 | 2.00        | down | INSIG1        |
| 8033362a      | 1.46E-03 | 1.72        | up   | INSR          |
| 7921033a      | 4.37E-04 | 1.69        | down | IQGAP3        |
| 8175977a      | 4.37E-04 | 1.57        | down | IRAK1         |
| 8120826a      | 3.61E-03 | 1.63        | up   | IRAK1BP1      |
| 8112331a      | 4.15E-04 | 1.67        | up   | ISCA1;ISCA1L  |
| 8001211a      | 6.18E-04 | 1.79        | down | ITFG1         |
| 7989985a      | 9.21E-04 | 2.43        | down | ITGA11        |
| 8046695a      | 2.99E-03 | 3.25        | up   | ITGA4;CERKL   |
| 7963786a      | 1.57E-04 | 1.85        | down | ITGA5         |
| 8046861a      | 5.92E-05 | 1.63        | down | ITGAV         |
| 8007931a      | 9.71E-03 | 2.00        | down | ITGB3         |
| 8009951a      | 1.43E-02 | 1.61        | down | ITGB4         |
| 7969861a      | 3.04E-05 | 2.90        | down | ITGBL1        |
| 8173755a      | 2.23E-02 | 2.53        | up   | ITM2A         |
| 7980970a      | 8.09E-04 | 1.66        | down | ITPK1         |

| Transcript ID | p-value  | Fold Change | Reg  | Gene Symbol                                      |
|---------------|----------|-------------|------|--------------------------------------------------|
| 7961900a      | 1.00E-03 | 1.80        | down | ITPR2                                            |
| 7936242a      | 2.53E-04 | 1.61        | down | ITPRIP                                           |
| 8064978a      | 2.32E-03 | 2.17        | down | JAG1                                             |
| 8138789a      | 5.25E-03 | 1.71        | down | JAZF1                                            |
| 7998267a      | 4.51E-03 | 1.58        | down | JMJD8                                            |
| 8151423a      | 4.72E-05 | 2.30        | up   | JPH1                                             |
| 8026047a      | 3.27E-05 | 2.06        | down | JUNB                                             |
| 8015412a      | 4.02E-03 | 1.76        | up   | JUP                                              |
| 8154012a      | 1.57E-02 | 1.99        | up   | KANK1                                            |
| 8015526a      | 3.64E-04 | 1.65        | up   | KAT2A                                            |
| 8078227a      | 4.16E-04 | 2.05        | down | KAT2B                                            |
| 7970844a      | 4.02E-03 | 1.78        | down | KATNAL1                                          |
| 7909730a      | 1.11E-02 | 1.90        | up   | KCNK2                                            |
| 7957126a      | 7.01E-03 | 1.52        | up   | KCNMB4                                           |
| 8120654a      | 1.55E-05 | 4.99        | up   | KCNQ5                                            |
| 7950641a      | 7.34E-03 | 2.31        | down | KCTD14                                           |
| 8027584a      | 1.89E-03 | 1.75        | up   | KCTD15                                           |
| 7943282a      | 1.59E-04 | 1.83        | up   | KDM4D                                            |
| 8177232a      | 1.55E-04 | 4.58        | down | KDM5D                                            |
| 8148448a      | 2.06E-02 | 1.64        | down | KHDRBS3                                          |
| 7911854a      | 2.51E-06 | 2.09        | up   | KIAA0495                                         |
| 7971246a      | 6.46E-05 | 1.57        | down | KIAA0564                                         |
| 8011293a      | 5.35E-05 | 1.60        | up   | KIAA0664                                         |
| 8099721a      | 2.56E-03 | 1.76        | down | KIAA0746                                         |
| 8104350a      | 1.39E-03 | 1.58        | up   | KIAA0947                                         |
| 8097148a      | 8.87E-06 | 1.70        | down | KIAA1109                                         |
| 7926679a      | 1.22E-02 | 1.62        | down | KIAA1217                                         |
| 8122279a      | 8.26E-04 | 2.73        | up   | KIAA1244;LOC202451                               |
| 8140709a      | 2.01E-05 | 2.59        | up   | KIAA1324L                                        |
| 7988970a      | 1.15E-03 | 1.55        | down | KIAA1370                                         |
| 8160981a      | 6.18E-04 | 1.58        | down | KIAA1539                                         |
| 8143247a      | 4.77E-04 | 1.58        | up   | KIAA1549                                         |
| 8003158a      | 5.04E-04 | 1.72        | up   | KIAA1609                                         |
| 8098348a      | 4.55E-05 | 1.53        | down | KIAA1712;FBXO8                                   |
| 8020384a      | 4.74E-04 | 1.66        | up   | KIAA1772                                         |
| 7910600a      | 6.41E-03 | 1.71        | up   | KIAA1804                                         |
| 8050128a      | 1.81E-04 | 1.56        | down | KIDINS220                                        |
| 8016147a      | 6.20E-04 | 1.66        | up   | KIF18B                                           |
| 8016139a      | 2.57E-04 | 1.59        | up   | KIF18B                                           |
| 8162019a      | 1.49E-02 | 1.50        | up   | KIF27;LOC389765                                  |
| 8045637a      | 5.30E-04 | 3.91        | up   | KIF5C                                            |
| 7922268a      | 9.70E-04 | 1.65        | down | KIFAP3                                           |
| 8031311a      | 2.96E-02 | 1.52        | down | KIR3DL1;KIR3DS1;KIR2DS2;KIR2DL5A;KIR2DL2;KIR2DL3 |
| 7923621a      | 8.51E-04 | 1.53        | up   | KISS1                                            |
| 8095110a      | 2.16E-03 | 3.71        | up   | KIT                                              |
| 7965322a      | 5.73E-04 | 1.94        | down | KITLG                                            |

| Transcript ID | p-value  | Fold Change | Reg  | Gene Symbol                                    |
|---------------|----------|-------------|------|------------------------------------------------|
| 8040211a      | 1.99E-04 | 1.83        | down | KLF11                                          |
| 8163002a      | 4.17E-03 | 1.60        | up   | KLF4                                           |
| 7931810a      | 3.28E-05 | 1.98        | down | KLF6                                           |
| 8015456a      | 4.42E-04 | 1.71        | up   | KLHL11                                         |
| 8171837a      | 7.55E-05 | 1.51        | up   | KLHL15                                         |
| 8046186a      | 5.42E-05 | 1.68        | up   | KLHL23;PHOSPHO2                                |
| 8168622a      | 2.64E-06 | 5.82        | down | KLHL4                                          |
| 8094625a      | 2.76E-05 | 2.38        | down | KLHL5                                          |
| 8015349a      | 3.40E-02 | 3.02        | up   | KRT19                                          |
| 8015262a      | 3.65E-04 | 1.97        | up   | KRT33B                                         |
| 8015268a      | 2.28E-04 | 4.38        | up   | KRT34                                          |
| 8015208a      | 1.18E-03 | 1.76        | up   | KRTAP2-1;KRTAP2-2;KRTAP2-4;hCG_1749898;KAP2.1B |
| 8019576a      | 8.62E-03 | 2.34        | up   | KRTAP2-4;KRTAP2-1;KRTAP2-2;hCG_1749898;KAP2.1B |
| 8019699a      | 4.20E-04 | 1.55        | up   | KRTAP4-11;KRTAP4-8;KRTAP4-7                    |
| 8019565a      | 8.18E-04 | 1.89        | up   | KRTAP4-12;KRTAP4-5;KRTAP4-2;KRTAP4-11          |
| 8007115a      | 2.16E-03 | 1.63        | up   | KRTAP4-9;KRTAP4-11;KRTAP4-8;KRTAP4-7           |
| 8175871a      | 2.51E-06 | 3.94        | up   | L1CAM                                          |
| 7984103a      | 3.87E-04 | 1.60        | down | LACTB                                          |
| 8176093a      | 2.78E-04 | 1.78        | down | LAGE3                                          |
| 8142194a      | 1.34E-03 | 2.05        | down | LAMB1                                          |
| 7924029a      | 4.53E-02 | 1.63        | up   | LAMB3                                          |
| 7908041a      | 1.51E-03 | 1.63        | down | LAMC1                                          |
| 7908072a      | 6.18E-06 | 4.55        | down | LAMC2                                          |
| 8096938a      | 2.75E-05 | 1.52        | down | LARP7                                          |
| 8025382a      | 1.57E-05 | 1.66        | up   | LASS4                                          |
| 7994535a      | 1.63E-04 | 1.53        | up   | LAT;SPNS1                                      |
| 8025828a      | 2.64E-03 | 1.55        | down | LDLR                                           |
| 8175539a      | 1.50E-03 | 1.79        | down | LDOC1                                          |
| 8145942a      | 1.16E-02 | 1.52        | down | LETM2                                          |
| 7971150a      | 1.62E-04 | 1.67        | down | LHFP                                           |
| 8075310a      | 3.44E-03 | 1.61        | down | LIF;MGC20647                                   |
| 8077490a      | 3.00E-04 | 2.19        | down | LMCD1                                          |
| 8107066a      | 8.57E-04 | 1.86        | down | LNPEP                                          |
| 8036302a      | 8.51E-04 | 1.81        | up   | LOC100127980                                   |
| 8135585a      | 6.19E-03 | 1.88        | down | LOC100128868                                   |
| 8155503a      | 7.67E-05 | 2.13        | down | LOC100132167;LOC100292301                      |
| 8161368a      | 2.11E-05 | 1.92        | down | LOC100132167;LOC100292301                      |
| 8161554a      | 8.40E-03 | 1.66        | up   | LOC100289528                                   |
| 8053379a      | 1.72E-03 | 1.59        | up   | LOC129293                                      |
| 8154727a      | 4.08E-04 | 1.66        | up   | LOC138412                                      |
| 8012282a      | 6.81E-04 | 1.76        | up   | LOC284023                                      |
| 8094226a      | 2.97E-04 | 1.66        | down | LOC285550                                      |
| 7977270a      | 2.54E-02 | 1.62        | down | LOC388022                                      |
| 8129039a      | 1.65E-03 | 1.53        | up   | LOC442249                                      |
| 8160431a      | 7.05E-05 | 3.38        | down | LOC554202                                      |
| 8168412a      | 4.16E-04 | 1.62        | down | LOC554203                                      |

| Transcript ID | p-value  | Fold Change | Reg  | Gene Symbol                                     |
|---------------|----------|-------------|------|-------------------------------------------------|
| 7983132a      | 7.41E-06 | 1.55        | down | LOC645106                                       |
| 7960889a      | 7.14E-04 | 1.57        | up   | LOC653113                                       |
| 7985431a      | 2.41E-02 | 1.63        | up   | LOC80154;LOC388152;LOC727751;LOC727849          |
| 8074925a      | 8.31E-05 | 1.51        | down | LOC91316;GUSB;GUSBL1;LOC100294451               |
| 8077499a      | 1.52E-04 | 2.03        | down | LOH3CR2A                                        |
| 7984771a      | 1.85E-04 | 2.00        | down | LOXL1                                           |
| 7917276a      | 2.73E-02 | 1.85        | up   | LPAR3                                           |
| 7971565a      | 2.71E-05 | 2.31        | down | LPAR6                                           |
| 7995697a      | 9.40E-05 | 2.57        | down | LPCAT2                                          |
| 7902565a      | 4.40E-02 | 3.89        | down | LPHN2                                           |
| 8040340a      | 1.06E-05 | 1.63        | down | LPIN1                                           |
| 7948332a      | 4.56E-04 | 2.04        | down | LPXN                                            |
| 7964602a      | 2.03E-03 | 1.63        | down | LRIG3                                           |
| 7956301a      | 4.49E-03 | 1.71        | down | LRP1                                            |
| 8152280a      | 3.08E-05 | 1.54        | down | LRP12                                           |
| 7986394a      | 8.34E-05 | 1.70        | down | LRRC28                                          |
| 8007850a      | 1.45E-03 | 3.01        | up   | LRRC37A;LRRC37A2;LRRC37A3;LRRC37A4;LOC100294335 |
| 7902235a      | 8.51E-03 | 2.57        | up   | LRRC7                                           |
| 8147079a      | 3.14E-02 | 1.75        | down | LRRCC1                                          |
| 8150206a      | 9.78E-05 | 1.56        | up   | LSM12                                           |
| 7968126a      | 2.73E-05 | 1.80        | up   | LSP1                                            |
| 7905028a      | 1.26E-05 | 1.80        | up   | LSP1;LOC645166;LOC654342                        |
| 7980152a      | 2.13E-04 | 2.44        | down | LTBP2                                           |
| 8148572a      | 2.56E-04 | 1.83        | up   | LY6E                                            |
| 8178059a      | 1.36E-03 | 1.54        | up   | LY6G5B;CSNK2B                                   |
| 8056113a      | 5.30E-05 | 1.88        | down | LY75;CD302                                      |
| 8146500a      | 1.45E-03 | 1.76        | up   | LYN                                             |
| 8045674a      | 2.03E-03 | 3.40        | up   | LYPD6                                           |
| 8045664a      | 1.26E-05 | 8.17        | up   | LYPD6B                                          |
| 8168458a      | 6.21E-05 | 1.79        | up   | MAGEE1                                          |
| 8167887a      | 2.11E-02 | 1.56        | down | MAGEH1                                          |
| 8148040a      | 1.75E-02 | 4.86        | up   | MAL2                                            |
| 8170420a      | 2.59E-03 | 1.91        | down | MAMLD1                                          |
| 8129254a      | 2.02E-06 | 3.08        | up   | MAN1A1                                          |
| 7961365a      | 8.42E-04 | 2.34        | down | MANSC1                                          |
| 8106098a      | 1.57E-04 | 1.68        | down | MAP1B                                           |
| 7997740a      | 1.11E-03 | 1.59        | up   | MAP1LC3B                                        |
| 7959023a      | 5.83E-04 | 1.63        | up   | MAP1LC3B2                                       |
| 8047926a      | 4.58E-05 | 1.81        | down | MAP2                                            |
| 7984408a      | 6.63E-05 | 1.57        | down | MAP2K5                                          |
| 8016194a      | 4.71E-02 | 1.51        | up   | MAP3K14;LOC100133991                            |
| 8171653a      | 3.51E-04 | 2.16        | up   | MAP3K15;PDHA1                                   |
| 8129804a      | 2.53E-02 | 1.85        | up   | MAP3K5                                          |
| 8175369a      | 4.50E-07 | 2.03        | down | MAP7D3                                          |
| 8101925a      | 5.61E-04 | 1.60        | down | MAPKSP1                                         |
| 8103508a      | 4.89E-03 | 2.14        | down | MARCH1                                          |

| Transcript ID | p-value  | Fold Change | Reg  | Gene Symbol              |
|---------------|----------|-------------|------|--------------------------|
| 7909841a      | 4.36E-02 | 2.43        | up   | MARK1                    |
| 8177498a      | 1.02E-02 | 1.83        | down | MARVELD2                 |
| 8147516a      | 2.48E-03 | 1.61        | up   | MATN2                    |
| 8124166a      | 2.32E-02 | 1.66        | up   | MBOAT1                   |
| 8161249a      | 5.89E-03 | 1.62        | down | MCART1                   |
| 8113551a      | 1.69E-03 | 1.63        | down | MCC                      |
| 7919751a      | 4.72E-05 | 1.50        | down | MCL1                     |
| 8129214a      | 1.77E-03 | 1.55        | up   | MCM9                     |
| 7917283a      | 8.52E-03 | 1.66        | up   | MCOLN2                   |
| 7917304a      | 1.35E-02 | 1.78        | up   | MCOLN3                   |
| 7986293a      | 2.34E-02 | 2.22        | up   | MCTP2                    |
| 8172119a      | 3.17E-05 | 1.57        | down | MED14                    |
| 7911799a      | 1.04E-05 | 1.58        | down | MEGF6                    |
| 8042356a      | 2.01E-04 | 3.48        | down | MEIS1                    |
| 8044391a      | 2.15E-04 | 2.13        | up   | MERTK                    |
| 8011275a      | 5.87E-05 | 1.51        | up   | METT10D                  |
| 8103695a      | 6.13E-03 | 1.50        | up   | MFAP3L                   |
| 8149258a      | 6.39E-03 | 1.51        | down | MFHAS1                   |
| 8054135a      | 3.66E-02 | 1.71        | up   | MGAT4A                   |
| 8045349a      | 1.81E-04 | 1.53        | up   | MGAT5                    |
| 8007799a      | 7.14E-05 | 2.11        | up   | MGC57346                 |
| 8042574a      | 3.28E-02 | 1.50        | up   | MGC72080;DAPL1;LOC441453 |
| 8097513a      | 5.52E-04 | 2.03        | down | MGST2                    |
| 8171297a      | 1.26E-04 | 2.54        | down | MID1                     |
| 7932733a      | 4.00E-04 | 2.81        | up   | MKX                      |
| 8078544a      | 7.08E-04 | 1.56        | down | MLH1                     |
| 8002778a      | 3.27E-02 | 1.54        | down | MLKL                     |
| 7905329a      | 3.06E-04 | 2.91        | down | MLLT11                   |
| 8016832a      | 1.60E-04 | 1.61        | down | MMD                      |
| 8083494a      | 3.01E-02 | 2.28        | up   | MME                      |
| 8151684a      | 8.43E-03 | 1.92        | down | MMP16                    |
| 8151686a      | 5.85E-03 | 1.85        | down | MMP16                    |
| 7995681a      | 6.43E-06 | 4.12        | down | MMP2                     |
| 8160521a      | 3.72E-02 | 1.84        | up   | MOBKL2B                  |
| 8020955a      | 5.97E-03 | 1.73        | up   | MOCOS                    |
| 7909877a      | 7.86E-03 | 1.85        | up   | MOSC1                    |
| 8160088a      | 6.54E-04 | 1.50        | down | MPDZ                     |
| 8176174a      | 1.83E-04 | 1.75        | down | MPP1                     |
| 8015868a      | 1.53E-03 | 1.51        | up   | MPP2                     |
| 8058273a      | 3.93E-02 | 1.57        | down | MPP4                     |
| 7932765a      | 1.22E-04 | 4.54        | up   | MPP7                     |
| 8009040a      | 7.46E-04 | 1.91        | down | MRC2                     |
| 8179139a      | 3.73E-05 | 1.52        | up   | MRPS18B                  |
| 8159249a      | 5.92E-05 | 1.53        | up   | MRPS2                    |
| 8105181a      | 2.54E-04 | 2.18        | up   | MRPS30                   |
| 8105852a      | 3.50E-03 | 1.59        | down | MRPS36                   |

| Transcript ID | p-value  | Fold Change | Reg  | Gene Symbol                                      |
|---------------|----------|-------------|------|--------------------------------------------------|
| 8151334a      | 8.94E-08 | 3.50        | down | MSC                                              |
| 8106633a      | 6.92E-03 | 1.51        | down | MSH3                                             |
| 7992071a      | 1.53E-03 | 1.73        | down | MSLN                                             |
| 8176219a      | 5.37E-05 | 1.84        | down | MTCP1;MTCP1NB                                    |
| 8170428a      | 1.38E-05 | 2.28        | down | MTM1                                             |
| 8170443a      | 1.74E-05 | 1.79        | down | MTMR1                                            |
| 7970655a      | 2.27E-04 | 1.54        | down | MTMR6                                            |
| 8104422a      | 7.86E-04 | 1.69        | up   | MTRR                                             |
| 7920642a      | 2.78E-02 | 1.65        | down | MUC1                                             |
| 8068713a      | 3.31E-02 | 1.54        | up   | MX1                                              |
| 8098995a      | 5.88E-05 | 1.70        | down | MXD4                                             |
| 8011640a      | 2.37E-05 | 1.60        | up   | MYBBP1A;SPNS2                                    |
| 8117020a      | 7.02E-04 | 2.01        | up   | MYLIP                                            |
| 7990092a      | 2.05E-04 | 1.59        | down | MYO9A                                            |
| 8101086a      | 5.38E-05 | 1.96        | down | NAAA                                             |
| 8141872a      | 2.23E-03 | 2.06        | down | NAPEPLD                                          |
| 7939265a      | 7.41E-06 | 1.83        | up   | NAT10                                            |
| 8093578a      | 6.96E-05 | 1.59        | up   | NAT8L                                            |
| 7922773a      | 2.83E-02 | 1.54        | down | NCF2                                             |
| 8000957a      | 3.91E-04 | 1.73        | up   | NCRNA00095                                       |
| 8169659a      | 4.97E-04 | 1.56        | down | NDUFA1                                           |
| 7987642a      | 8.22E-04 | 1.69        | down | NDUFAF1                                          |
| 7989094a      | 5.95E-07 | 3.14        | down | NEDD4                                            |
| 7916986a      | 2.46E-02 | 1.90        | down | NEGR1                                            |
| 8103646a      | 1.83E-05 | 1.77        | down | NEK1                                             |
| 8082643a      | 2.08E-02 | 1.52        | up   | NEK11                                            |
| 7971780a      | 5.47E-04 | 1.87        | down | NEK3                                             |
| 8001197a      | 8.57E-03 | 1.53        | down | NETO2                                            |
| 7901788a      | 2.93E-04 | 2.52        | down | NFIA                                             |
| 8160138a      | 2.13E-03 | 1.56        | down | NFIB                                             |
| 8028552a      | 3.13E-04 | 1.63        | up   | NFKBIB                                           |
| 8109563a      | 1.43E-02 | 1.78        | up   | NIPAL4                                           |
| 8014214a      | 2.53E-04 | 1.67        | up   | NLE1                                             |
| 7995926a      | 6.26E-05 | 1.56        | down | NLRC5                                            |
| 7946334a      | 3.21E-04 | 2.36        | up   | NLRP10                                           |
| 8083757a      | 2.57E-04 | 1.51        | up   | NMD3                                             |
| 8055702a      | 7.96E-03 | 1.62        | down | NMI                                              |
| 7932227a      | 2.15E-03 | 1.76        | down | NMT2                                             |
| 8100464a      | 2.52E-03 | 2.70        | up   | NMU                                              |
| 7943998a      | 2.50E-03 | 1.53        | up   | NNMT                                             |
| 8165217a      | 1.87E-04 | 1.61        | up   | NOTCH1                                           |
| 8148049a      | 2.72E-04 | 3.57        | up   | NOV                                              |
| 7950933a      | 2.30E-05 | 8.16        | up   | NOX4                                             |
| 8043909a      | 2.62E-02 | 1.52        | up   | NPAS2                                            |
| 7993359a      | 5.39E-03 | 1.88        | up   | NPIP;LOC339047;NPIPL2;LOC399491;LOC730153;NPIPL3 |
| 7912520a      | 1.06E-03 | 9.70        | up   | NPPB                                             |

| Transcript ID | p-value  | Fold Change | Reg  | Gene Symbol          |
|---------------|----------|-------------|------|----------------------|
| 8104746a      | 8.57E-06 | 18.52       | down | NPR3                 |
| 7990253a      | 1.77E-05 | 1.69        | down | NPTN                 |
| 8002303a      | 5.21E-03 | 1.52        | down | NQO1                 |
| 8035628a      | 2.43E-03 | 1.58        | down | NR2C2AP;RFXANK       |
| 8103094a      | 1.65E-03 | 2.03        | down | NR3C2                |
| 7946446a      | 4.00E-02 | 1.51        | up   | NRIP3                |
| 8169115a      | 6.12E-03 | 3.28        | up   | NRK                  |
| 8123739a      | 2.67E-02 | 1.80        | down | NRN1                 |
| 7976012a      | 3.57E-03 | 3.65        | up   | NRXN3                |
| 8170590a      | 1.25E-05 | 1.57        | down | NSDHL                |
| 8110894a      | 2.09E-04 | 1.70        | up   | NSUN2                |
| 8138941a      | 2.09E-03 | 1.81        | up   | NT5C3                |
| 8087935a      | 1.45E-03 | 1.54        | down | NT5DC2               |
| 8120967a      | 8.20E-03 | 2.26        | up   | NT5E                 |
| 7923753a      | 1.47E-05 | 2.00        | down | NUAK2                |
| 7993185a      | 2.64E-06 | 1.51        | up   | NUBP1                |
| 8085431a      | 1.58E-05 | 3.50        | up   | NUP210               |
| 8000574a      | 1.95E-03 | 1.66        | down | NUPR1                |
| 7936134a      | 3.77E-04 | 1.74        | down | OBFC1                |
| 8100298a      | 1.16E-04 | 2.36        | down | OCIAD2               |
| 8109752a      | 2.12E-03 | 3.40        | up   | ODZ2                 |
| 8120602a      | 2.07E-04 | 1.59        | down | OGFRL1               |
| 7961142a      | 3.37E-04 | 7.11        | up   | OLR1                 |
| 8173310a      | 4.16E-04 | 1.63        | down | OPHN1                |
| 8011320a      | 4.38E-04 | 1.51        | down | OR1D5;OR1D4          |
| 8143629a      | 7.72E-04 | 1.73        | down | OR2A9P;OR2A20P;OR2A5 |
| 7911231a      | 6.98E-04 | 1.62        | up   | OR2W3                |
| 8147573a      | 3.08E-04 | 1.69        | up   | OSR2                 |
| 7982294a      | 9.75E-03 | 1.51        | down | OTUD7A;MGC131512     |
| 8085138a      | 5.15E-03 | 3.30        | up   | OXTR                 |
| 8011415a      | 1.07E-04 | 2.67        | up   | P2RX5                |
| 7950374a      | 2.41E-04 | 1.88        | down | P4HA3                |
| 7912937a      | 1.79E-04 | 1.50        | up   | PADI2                |
| 8151512a      | 1.74E-03 | 1.84        | down | PAG1                 |
| 8169389a      | 1.02E-05 | 1.71        | down | PAK3                 |
| 8098263a      | 2.03E-03 | 1.67        | down | PALLD                |
| 8102214a      | 7.35E-05 | 1.96        | down | PAPSS1               |
| 7981943a      | 8.22E-03 | 2.26        | down | PAR5;SNORD64         |
| 7965112a      | 6.60E-05 | 1.77        | down | PAWR                 |
| 7947338a      | 5.60E-03 | 3.14        | up   | PAX6                 |
| 8087806a      | 5.28E-03 | 1.52        | down | PCBP4                |
| 7969330a      | 8.04E-05 | 1.58        | up   | PCDH17               |
| 8091243a      | 4.81E-03 | 1.58        | up   | PCOLCE2              |
| 7930454a      | 1.42E-02 | 1.57        | down | PDCD4                |
| 8102532a      | 2.42E-03 | 1.50        | up   | PDE5A                |
| 7985662a      | 2.13E-04 | 1.50        | down | PDE8A                |



| Transcript ID | p-value  | Fold Change | Reg  | Gene Symbol        |
|---------------|----------|-------------|------|--------------------|
| 8137670a      | 2.22E-02 | 1.79        | down | PDGFA;LOC100132080 |
| 8076195a      | 5.68E-04 | 1.96        | down | PDGFB              |
| 8103399a      | 2.66E-05 | 2.17        | down | PDGFC              |
| 8166511a      | 2.17E-04 | 2.05        | up   | PDK3               |
| 8107897a      | 1.33E-03 | 2.15        | down | PDLIM4             |
| 8096489a      | 1.70E-03 | 1.71        | down | PDLIM5             |
| 8104693a      | 2.43E-03 | 1.65        | down | PDZD2              |
| 7906264a      | 2.36E-04 | 1.81        | down | PEAR1              |
| 8134339a      | 7.05E-05 | 3.07        | up   | PEG10              |
| 8013120a      | 1.49E-03 | 1.54        | up   | PEMT               |
| 7897378a      | 5.69E-04 | 1.72        | down | PER3;UTS2          |
| 8129880a      | 7.75E-05 | 4.72        | up   | PERP               |
| 8075406a      | 3.18E-05 | 1.51        | up   | PES1               |
| 8004804a      | 3.95E-04 | 1.54        | up   | PFAS               |
| 8134098a      | 2.02E-06 | 3.33        | down | PFTK1              |
| 7929624a      | 1.31E-04 | 1.63        | up   | PGAM1;PGAM4        |
| 8147469a      | 3.21E-02 | 1.74        | down | PGCP               |
| 7980233a      | 1.18E-05 | 2.44        | down | PGF                |
| 7950391a      | 1.47E-03 | 2.02        | down | PGM2L1             |
| 8122426a      | 1.02E-03 | 1.74        | down | PHACTR2            |
| 7953812a      | 8.09E-03 | 2.04        | up   | PHC1;M6PR          |
| 7969129a      | 1.96E-02 | 1.52        | down | PHF11              |
| 8173551a      | 3.86E-02 | 1.56        | up   | PHKA1              |
| 7995382a      | 1.29E-04 | 1.69        | down | PHKB               |
| 7983811a      | 2.69E-04 | 1.64        | down | PIGB;CCPG1         |
| 7922330a      | 7.45E-04 | 1.57        | down | PIGC               |
| 8051993a      | 4.80E-04 | 1.75        | down | PIGF               |
| 8075483a      | 4.01E-04 | 1.56        | down | PIK3IP1            |
| 7915787a      | 2.67E-03 | 1.84        | down | PIK3R3             |
| 8168366a      | 2.27E-03 | 1.51        | down | PIN4               |
| 8009353a      | 2.19E-03 | 1.59        | down | PITPNC1            |
| 8101429a      | 2.66E-03 | 2.94        | up   | PLAC8              |
| 8150509a      | 2.38E-03 | 2.68        | up   | PLAT               |
| 7928429a      | 1.29E-02 | 1.73        | down | PLAU;C10orf55      |
| 8086185a      | 6.21E-05 | 1.55        | down | PLCD1              |
| 7929388a      | 4.29E-05 | 2.57        | down | PLCE1              |
| 8078187a      | 5.76E-04 | 2.01        | up   | PLCL2              |
| 8176286a      | 1.05E-04 | 2.51        | up   | PLCXD1             |
| 8013068a      | 1.91E-05 | 1.75        | up   | PLD6               |
| 7979710a      | 7.55E-04 | 2.01        | down | PLEK2              |
| 8145977a      | 5.00E-03 | 1.57        | down | PLEKHA2            |
| 8028656a      | 6.37E-04 | 1.55        | down | PLEKHG2            |
| 7996516a      | 8.55E-04 | 1.69        | down | PLEKHG4            |
| 7905116a      | 2.84E-04 | 1.63        | down | PLEKHO1            |
| 8112202a      | 8.17E-04 | 1.52        | up   | PLK2               |
| 8083146a      | 3.64E-04 | 1.63        | up   | PLS1               |

| Transcript ID | p-value  | Fold Change | Reg  | Gene Symbol                             |
|---------------|----------|-------------|------|-----------------------------------------|
| 8169473a      | 1.67E-05 | 1.66        | down | PLS3                                    |
| 8170921a      | 1.20E-04 | 1.78        | down | PLXNA3                                  |
| 8067233a      | 5.95E-07 | 4.22        | down | PMEPA1                                  |
| 7993148a      | 3.28E-04 | 1.62        | up   | PMM2                                    |
| 8012896a      | 1.06E-03 | 1.91        | up   | PMP22                                   |
| 8082368a      | 1.12E-02 | 1.55        | up   | PODXL2                                  |
| 8166525a      | 1.22E-04 | 1.55        | up   | POLA1                                   |
| 8106820a      | 3.10E-02 | 2.01        | up   | POLR3G                                  |
| 8133331a      | 3.02E-02 | 1.54        | up   | POM121;POM121C                          |
| 7971077a      | 2.23E-03 | 2.63        | down | POSTN                                   |
| 7930980a      | 3.52E-04 | 3.09        | down | PPAPDC1A                                |
| 7942503a      | 2.40E-04 | 1.86        | up   | PPME1                                   |
| 8134351a      | 3.14E-02 | 1.60        | up   | PPP1R9A                                 |
| 8150126a      | 1.88E-04 | 1.53        | down | PPP2CB                                  |
| 8114900a      | 2.43E-04 | 4.72        | up   | PPP2R2B                                 |
| 8149250a      | 1.53E-03 | 1.51        | down | PRAGMIN                                 |
| 8121257a      | 6.27E-04 | 2.37        | up   | PRDM1                                   |
| 7962375a      | 3.27E-04 | 2.60        | down | PRICKLE1                                |
| 8088550a      | 2.93E-04 | 2.18        | down | PRICKLE2                                |
| 7901720a      | 6.21E-03 | 5.15        | up   | PRKAA2                                  |
| 8143961a      | 1.68E-04 | 1.55        | down | PRKAG2                                  |
| 8137675a      | 1.04E-05 | 1.75        | up   | PRKAR1B                                 |
| 8135378a      | 3.92E-03 | 2.66        | up   | PRKAR2B                                 |
| 8041763a      | 1.39E-04 | 1.58        | down | PRKCE                                   |
| 8171182a      | 6.85E-04 | 2.19        | up   | PRKX                                    |
| 8176460a      | 2.03E-04 | 1.72        | down | PRKY                                    |
| 8111490a      | 3.57E-04 | 1.78        | up   | PRLR                                    |
| 7924817a      | 5.78E-04 | 1.80        | down | PRO2012                                 |
| 8089011a      | 1.39E-03 | 2.25        | down | PROS1                                   |
| 8089015a      | 3.54E-03 | 2.00        | down | PROS1                                   |
| 8166049a      | 1.31E-04 | 1.86        | up   | PRPS2                                   |
| 8107563a      | 3.89E-02 | 1.63        | down | PRR16                                   |
| 8166705a      | 8.57E-06 | 2.12        | down | PRRG1;TSPAN7                            |
| 8102468a      | 7.92E-04 | 2.43        | up   | PRSS12                                  |
| 8161884a      | 2.80E-03 | 2.82        | down | PRUNE2                                  |
| 8161865a      | 2.10E-03 | 2.76        | down | PRUNE2                                  |
| 8177323a      | 1.80E-02 | 1.55        | up   | PRY;PRY2                                |
| 8037240a      | 8.19E-04 | 5.66        | up   | PSG1                                    |
| 8037267a      | 1.06E-03 | 10.91       | up   | PSG2                                    |
| 8037231a      | 8.66E-04 | 7.96        | up   | PSG3                                    |
| 8037283a      | 4.13E-03 | 2.89        | up   | PSG4;PSG1                               |
| 8037272a      | 1.35E-04 | 7.70        | up   | PSG5;PSG3;PSG7;PSG8;PSG4;PSG1           |
| 8037246a      | 3.43E-03 | 1.69        | up   | PSG6                                    |
| 8037251a      | 6.57E-04 | 5.19        | up   | PSG7;PSG8;PSG4;PSG3;PSG1;PSG9;PSG5;PSG6 |
| 8037290a      | 7.31E-04 | 2.38        | up   | PSG9;PSG11                              |
| 8002133a      | 2.95E-05 | 1.58        | down | PSMB10;CTRL                             |

| Transcript ID | p-value  | Fold Change | Reg  | Gene Symbol     |
|---------------|----------|-------------|------|-----------------|
| 8180049a      | 4.04E-03 | 1.52        | down | PSMB8           |
| 8162533a      | 2.08E-03 | 1.64        | up   | PTCH1           |
| 7915612a      | 9.98E-03 | 1.53        | up   | PTCH2           |
| 7926356a      | 1.93E-02 | 2.02        | up   | PTER;C1QL3      |
| 7962000a      | 2.59E-05 | 1.68        | down | PTHLH           |
| 7932420a      | 2.55E-04 | 1.99        | down | PTPLA           |
| 7939818a      | 3.04E-05 | 1.54        | up   | PTPMT1          |
| 8096176a      | 1.44E-02 | 4.19        | up   | PTPN13          |
| 7980616a      | 2.16E-04 | 1.78        | down | PTPN21          |
| 7931353a      | 6.82E-05 | 1.85        | down | PTPRE           |
| 8080810a      | 6.50E-03 | 1.71        | down | PTPRG           |
| 8083594a      | 3.34E-02 | 2.79        | down | PTX3            |
| 8069003a      | 2.45E-04 | 1.55        | up   | PWP2            |
| 8050007a      | 1.43E-03 | 1.60        | up   | PXDN            |
| 8151436a      | 2.97E-05 | 1.61        | down | PXMP3           |
| 7979085a      | 7.72E-05 | 1.69        | up   | PYGL            |
| 8041508a      | 2.58E-03 | 1.78        | down | QPCT            |
| 8165094a      | 3.55E-04 | 1.83        | up   | QSOX2           |
| 8150225a      | 4.67E-04 | 1.52        | down | RAB11FIP1       |
| 7989023a      | 6.83E-06 | 2.62        | down | RAB27A          |
| 7950743a      | 3.60E-03 | 1.76        | down | RAB30           |
| 8020110a      | 5.38E-04 | 1.61        | down | RAB31           |
| 7950899a      | 1.58E-02 | 2.08        | up   | RAB38           |
| 8174271a      | 1.10E-03 | 1.62        | down | RAB9B           |
| 8075910a      | 3.10E-03 | 1.62        | down | RAC2            |
| 8177478a      | 3.67E-03 | 1.52        | down | RAD17           |
| 7982792a      | 2.47E-04 | 1.54        | down | RAD51           |
| 8164810a      | 2.37E-03 | 1.57        | up   | RALGDS          |
| 7907657a      | 6.38E-03 | 1.73        | down | RALGPS2         |
| 8096538a      | 1.01E-04 | 1.69        | down | RAP1GDS1        |
| 8098121a      | 9.64E-06 | 1.87        | down | RAPGEF2         |
| 7963631a      | 5.14E-05 | 1.60        | down | RARG            |
| 8106784a      | 1.51E-03 | 1.92        | down | RASA1           |
| 7987405a      | 1.27E-03 | 2.03        | up   | RASGRP1         |
| 8041422a      | 4.75E-04 | 2.30        | up   | RASGRP3         |
| 7902023a      | 1.20E-02 | 2.23        | up   | RAVER2          |
| 7995631a      | 5.24E-05 | 1.57        | down | RBL2            |
| 8067869a      | 1.57E-04 | 1.72        | up   | RBM11           |
| 8078330a      | 4.91E-05 | 2.83        | down | RBMS3           |
| 7897522a      | 1.22E-04 | 3.87        | up   | RBP7            |
| 7971573a      | 6.20E-04 | 1.56        | down | RCBTB2          |
| 7899462a      | 1.04E-05 | 1.55        | up   | RCC1;SNHG3-RCC1 |
| 7986186a      | 2.51E-05 | 1.54        | down | RCCD1           |
| 8053551a      | 3.91E-03 | 1.85        | up   | REEP1           |
| 8165672a      | 3.83E-02 | 1.68        | up   | RFC1            |
| 7919971a      | 8.57E-04 | 1.67        | down | RFX5            |

| Transcript ID | p-value  | Fold Change | Reg  | Gene Symbol         |
|---------------|----------|-------------|------|---------------------|
| 7989132a      | 4.24E-04 | 1.75        | down | RFX7                |
| 7908125a      | 7.58E-04 | 1.55        | down | RGL1                |
| 8107100a      | 2.26E-02 | 1.59        | down | RGMB                |
| 7908409a      | 2.45E-02 | 1.62        | up   | RGS2                |
| 7906919a      | 2.44E-03 | 6.40        | down | RGS4                |
| 7925457a      | 1.92E-03 | 2.50        | up   | RGS7                |
| 8040473a      | 4.03E-05 | 2.39        | down | RHOB                |
| 8106986a      | 1.01E-02 | 1.91        | down | RHOBTB3             |
| 8074591a      | 2.01E-03 | 1.75        | up   | RIMBP3B;RIMBP3C     |
| 8070489a      | 1.29E-03 | 2.17        | down | RIPK4               |
| 8111286a      | 2.99E-03 | 1.58        | up   | RNASEN              |
| 7904830a      | 9.22E-04 | 1.71        | down | RNF115              |
| 8020806a      | 2.85E-04 | 1.50        | up   | RNF125              |
| 8117106a      | 9.78E-05 | 2.27        | up   | RNF144B             |
| 8018652a      | 4.02E-03 | 1.53        | down | RNF157              |
| 8121825a      | 4.21E-03 | 1.52        | down | RNF217              |
| 7948894a      | 1.30E-03 | 3.21        | down | RNU2-1;RNU2-2;WDR74 |
| 7967028a      | 1.79E-04 | 2.13        | down | RNU4-2              |
| 8044961a      | 1.48E-02 | 1.52        | down | RNU4ATAC            |
| 7984259a      | 8.55E-04 | 1.60        | down | RNU5B-1             |
| 7915592a      | 2.20E-02 | 1.57        | down | RNU5F               |
| 8050302a      | 6.39E-04 | 1.53        | down | ROCK2               |
| 8104492a      | 3.23E-02 | 1.58        | up   | ROPN1L              |
| 8162283a      | 2.18E-02 | 1.58        | up   | ROR2                |
| 8167006a      | 1.41E-04 | 1.58        | down | RP2                 |
| 8064868a      | 9.65E-04 | 1.96        | down | RP5-1022P6.2        |
| 8169949a      | 1.04E-03 | 8.20        | up   | RP6-213H19.1        |
| 8170859a      | 2.17E-03 | 1.96        | down | RPL10               |
| 7938295a      | 1.85E-03 | 1.69        | up   | RPL27A              |
| 7938286a      | 1.53E-04 | 1.64        | up   | RPL27A              |
| 7928551a      | 3.32E-03 | 1.57        | up   | RPS24               |
| 8176375a      | 3.36E-04 | 28.36       | down | RPS4Y1              |
| 8176730a      | 2.55E-04 | 1.96        | down | RPS4Y2              |
| 8130739a      | 2.28E-04 | 2.02        | down | RPS6KA2             |
| 7964733a      | 4.13E-02 | 1.50        | up   | RPSAP52             |
| 8027354a      | 9.12E-03 | 1.96        | up   | RPSAP58             |
| 8038407a      | 3.17E-05 | 1.64        | down | RRAS                |
| 7935425a      | 6.91E-05 | 1.72        | up   | RRP12               |
| 7999520a      | 5.24E-06 | 1.69        | up   | RSL1D1              |
| 7933855a      | 2.41E-03 | 1.71        | down | RTKN2               |
| 8007435a      | 8.83E-05 | 1.64        | up   | RUNDC1              |
| 8133961a      | 1.05E-02 | 1.53        | up   | RUNDC3B             |
| 7920128a      | 7.98E-04 | 1.56        | down | S100A11             |
| 8156278a      | 9.10E-04 | 1.54        | down | S1PR3;C9orf47       |
| 8152506a      | 1.20E-04 | 6.51        | up   | SAMD12              |
| 8140967a      | 1.41E-03 | 1.86        | down | SAMD9               |

| Transcript ID | p-value  | Fold Change | Reg  | Gene Symbol   |
|---------------|----------|-------------|------|---------------|
| 8140971a      | 9.39E-03 | 1.88        | down | SAMD9L        |
| 8005865a      | 1.54E-03 | 1.68        | up   | SARM1;TMEM199 |
| 8085716a      | 8.94E-06 | 4.55        | up   | SATB1         |
| 8058091a      | 5.51E-06 | 4.70        | up   | SATB2         |
| 8098195a      | 5.17E-04 | 1.79        | down | SC4MOL        |
| 8124594a      | 2.41E-03 | 1.57        | down | SCAND3        |
| 7990582a      | 3.05E-05 | 1.63        | down | SCAPER        |
| 7967544a      | 1.27E-05 | 2.05        | up   | SCARB1        |
| 8093576a      | 3.55E-03 | 1.58        | down | SCARNA22      |
| 8171758a      | 1.40E-02 | 2.02        | up   | SCARNA9L      |
| 7929816a      | 8.19E-04 | 2.14        | up   | SCD           |
| 8100347a      | 1.48E-03 | 1.51        | down | SCFD2         |
| 8171561a      | 1.77E-03 | 1.67        | up   | SCML2         |
| 8072328a      | 3.65E-04 | 1.65        | down | SEC14L2;MTP18 |
| 8086406a      | 9.10E-04 | 1.53        | down | SEC22C        |
| 8075462a      | 4.60E-04 | 1.57        | up   | SELM          |
| 8140668a      | 7.14E-04 | 6.51        | down | SEMA3A        |
| 8140534a      | 1.38E-04 | 1.88        | down | SEMA3C        |
| 8140686a      | 7.39E-03 | 3.16        | up   | SEMA3D        |
| 8079896a      | 1.37E-04 | 1.51        | down | SEMA3F        |
| 8162236a      | 9.06E-04 | 2.89        | up   | SEMA4D        |
| 7990345a      | 2.95E-03 | 1.87        | down | SEMA7A        |
| 8177658a      | 4.01E-04 | 1.62        | down | SERF1A;SERF1B |
| 7968892a      | 2.83E-04 | 1.77        | down | SERP2         |
| 7981068a      | 7.73E-05 | 2.06        | down | SERPINA1      |
| 7976496a      | 8.57E-06 | 3.70        | down | SERPINA3      |
| 8021623a      | 2.07E-02 | 2.35        | down | SERPINB7      |
| 8123609a      | 2.24E-04 | 1.65        | down | SERPINB9      |
| 8036908a      | 2.95E-03 | 1.52        | down | SERTAD3       |
| 8021047a      | 4.01E-04 | 1.64        | down | SETBP1        |
| 7969114a      | 7.81E-05 | 1.58        | down | SETDB2        |
| 8077370a      | 3.43E-03 | 2.15        | down | SETMAR        |
| 7931951a      | 1.23E-02 | 1.89        | down | SFMBT2        |
| 7929919a      | 4.00E-05 | 1.77        | down | SFXN3         |
| 8083471a      | 1.78E-04 | 5.63        | up   | SGEF          |
| 8129677a      | 7.28E-03 | 1.72        | down | SGK1          |
| 8168557a      | 1.75E-03 | 1.82        | down | SH3BGRL       |
| 8103166a      | 6.31E-05 | 1.99        | down | SH3D19        |
| 7970676a      | 9.41E-05 | 2.68        | down | SHISA2        |
| 8095834a      | 1.26E-05 | 1.82        | down | SHROOM3       |
| 8068496a      | 1.27E-04 | 1.99        | up   | SIM2          |
| 7925062a      | 1.33E-02 | 1.89        | down | SIPA1L2       |
| 8060418a      | 3.04E-05 | 3.25        | down | SIRPA         |
| 7979510a      | 3.37E-04 | 1.66        | up   | SIX4          |
| 7969533a      | 8.08E-03 | 2.33        | up   | SLAIN1        |
| 8176109a      | 1.79E-04 | 1.70        | down | SLC10A3       |

| Transcript ID | p-value  | Fold Change | Reg  | Gene Symbol           |
|---------------|----------|-------------|------|-----------------------|
| 7987192a      | 9.30E-05 | 1.65        | down | SLC12A6               |
| 8090214a      | 2.31E-02 | 1.54        | up   | SLC12A8               |
| 8066757a      | 2.36E-02 | 1.52        | up   | SLC13A3               |
| 7918622a      | 1.04E-05 | 1.56        | up   | SLC16A1               |
| 8059642a      | 2.07E-02 | 2.40        | down | SLC16A14              |
| 8070912a      | 7.12E-05 | 1.90        | up   | SLC19A1               |
| 8154135a      | 2.57E-03 | 1.78        | up   | SLC1A1                |
| 8018352a      | 1.27E-04 | 1.55        | up   | SLC25A19              |
| 8087224a      | 8.15E-03 | 1.54        | down | SLC25A20              |
| 8145291a      | 1.81E-04 | 2.32        | down | SLC25A37              |
| 8145281a      | 7.46E-03 | 1.52        | down | SLC25A37              |
| 8177003a      | 1.60E-04 | 1.58        | up   | SLC25A6;LOC138412     |
| 7983650a      | 3.93E-04 | 6.17        | up   | SLC27A2               |
| 7988426a      | 1.74E-04 | 1.71        | down | SLC30A4               |
| 7951485a      | 3.37E-04 | 1.53        | up   | SLC35F2               |
| 7950990a      | 8.57E-06 | 1.81        | up   | SLC36A4               |
| 8079931a      | 9.34E-03 | 1.62        | up   | SLC38A3               |
| 7962559a      | 3.19E-02 | 1.69        | down | SLC38A4               |
| 7965964a      | 1.79E-04 | 2.06        | down | SLC41A2               |
| 8013616a      | 1.71E-03 | 1.67        | up   | SLC46A1;SARM1;TMEM199 |
| 7970793a      | 9.06E-04 | 2.41        | down | SLC46A3               |
| 8085914a      | 4.17E-03 | 1.54        | down | SLC4A7                |
| 7965206a      | 3.49E-03 | 2.55        | up   | SLC6A15               |
| 8051762a      | 1.12E-04 | 2.94        | down | SLC8A1                |
| 8172280a      | 3.16E-03 | 1.61        | up   | SLC9A7                |
| 8063923a      | 8.57E-06 | 3.64        | up   | SLCO4A1;hCG_2018279   |
| 8113369a      | 1.92E-04 | 1.64        | up   | SLCO4C1               |
| 8014233a      | 9.11E-04 | 1.65        | up   | SLFN11                |
| 8115691a      | 5.95E-07 | 2.62        | down | SLIT3                 |
| 7984364a      | 5.06E-05 | 1.74        | down | SMAD3                 |
| 7984353a      | 3.84E-05 | 1.96        | down | SMAD6                 |
| 8023220a      | 5.35E-05 | 1.74        | down | SMAD7                 |
| 7971015a      | 4.09E-03 | 1.97        | down | SMAD9                 |
| 8136080a      | 3.04E-05 | 1.79        | up   | SMO                   |
| 8063382a      | 8.28E-06 | 2.29        | down | SNAI1                 |
| 7951032a      | 6.09E-04 | 1.57        | up   | SNORA1                |
| 7938293a      | 1.09E-04 | 1.53        | up   | SNORA45               |
| 8001748a      | 9.26E-04 | 1.64        | down | SNORA50               |
| 8170992a      | 7.88E-05 | 2.16        | down | SNORA56               |
| 8170863a      | 4.86E-05 | 2.29        | down | SNORA70;RPL10         |
| 7981949a      | 5.81E-03 | 3.09        | down | SNORD116-1            |
| 7981976a      | 2.91E-04 | 21.47       | down | SNORD116-14           |
| 7981978a      | 3.95E-04 | 16.17       | down | SNORD116-15           |
| 7981986a      | 2.30E-04 | 20.31       | down | SNORD116-14-22        |
| 7981988a      | 6.24E-04 | 11.53       | down | SNORD116-20;SNORD116@ |
| 7981990a      | 1.27E-04 | 12.47       | down | SNORD116-21;SNORD116@ |

| Transcript ID | p-value  | Fold Change | Reg  | Gene Symbol                                 |
|---------------|----------|-------------|------|---------------------------------------------|
| 7981994a      | 4.80E-02 | 1.53        | down | SNORD116-23                                 |
| 7981996a      | 2.69E-03 | 4.81        | down | SNORD116-24                                 |
| 7981998a      | 6.04E-03 | 1.51        | down | SNORD116-25                                 |
| 7981966a      | 2.10E-03 | 5.82        | down | SNORD116-3;SNORD116-7-9;SNORD116-5          |
| 7981955a      | 2.91E-03 | 2.24        | down | SNORD116-4;SNRPN                            |
| 7981962a      | 1.32E-02 | 3.20        | down | SNORD116-5;SNORD116-7;SNORD116-3;SNORD116-9 |
| 7981964a      | 5.91E-04 | 4.44        | down | SNORD116-8;SNORD116-3;SNORD116-9            |
| 8034512a      | 4.85E-02 | 1.52        | down | SNORD41                                     |
| 7951030a      | 4.86E-05 | 1.52        | up   | SNORD6                                      |
| 7981919a      | 2.06E-04 | 4.41        | down | SNRPN;SNURF                                 |
| 7990528a      | 7.41E-06 | 2.95        | down | SNUPN                                       |
| 8131957a      | 2.58E-02 | 1.96        | up   | SNX10                                       |
| 7985016a      | 2.88E-05 | 1.67        | down | SNX33                                       |
| 7983393a      | 4.41E-03 | 1.60        | up   | SORD                                        |
| 7978932a      | 7.81E-05 | 1.71        | down | SOS2                                        |
| 8117165a      | 7.46E-04 | 1.58        | down | SOX4                                        |
| 8175543a      | 3.40E-03 | 1.87        | down | SPANXC;SPANXA1;SPANXA2;SPANXD;SPANXE        |
| 8133654a      | 5.57E-03 | 1.68        | down | SPDYE5-8;SPDYE1-3                           |
| 7988286a      | 3.08E-05 | 1.75        | down | SPG11;ISLR                                  |
| 8173208a      | 6.20E-05 | 1.52        | down | SPIN4                                       |
| 8097282a      | 4.89E-04 | 1.73        | up   | SPRY1                                       |
| 7972217a      | 1.63E-02 | 1.51        | down | SPRY2                                       |
| 8060997a      | 1.65E-04 | 7.66        | down | SPTLC3                                      |
| 7983512a      | 4.30E-04 | 2.74        | down | SQRDL                                       |
| 8112940a      | 1.56E-03 | 3.32        | down | SSBP2                                       |
| 8170775a      | 1.96E-04 | 1.55        | down | SSR4                                        |
| 7974047a      | 5.84E-04 | 2.74        | up   | SSTR1                                       |
| 8153021a      | 2.21E-03 | 2.08        | down | ST3GAL1                                     |
| 7970924a      | 1.26E-05 | 1.71        | down | STARD13                                     |
| 7983143a      | 1.61E-04 | 1.64        | down | STARD9                                      |
| 7914904a      | 7.46E-04 | 1.55        | up   | STK40                                       |
| 8122457a      | 2.05E-04 | 1.92        | down | STX11                                       |
| 7899361a      | 1.16E-05 | 1.50        | down | STX12                                       |
| 8122600a      | 2.65E-04 | 1.85        | down | STXBP5                                      |
| 7978376a      | 6.33E-06 | 4.80        | up   | STXBP6                                      |
| 8066822a      | 7.40E-05 | 2.98        | down | SULF2                                       |
| 8086051a      | 1.44E-03 | 1.96        | down | SUSD5                                       |
| 7919645a      | 1.11E-03 | 1.85        | down | SV2A                                        |
| 8163202a      | 6.21E-05 | 1.90        | down | SVEP1                                       |
| 7932796a      | 2.68E-04 | 2.52        | down | SVIL                                        |
| 7947147a      | 5.21E-05 | 2.59        | up   | SVIP                                        |
| 8067305a      | 2.19E-05 | 2.01        | down | SYCP2                                       |
| 7914557a      | 6.83E-06 | 2.06        | down | SYNC                                        |
| 8010243a      | 8.87E-06 | 1.99        | up   | SYNGR2                                      |
| 7986385a      | 4.78E-04 | 1.71        | down | SYNM                                        |
| 7909494a      | 2.63E-02 | 2.04        | down | SYT14                                       |

| Transcript ID | p-value  | Fold Change | Reg  | Gene Symbol          |
|---------------|----------|-------------|------|----------------------|
| 8123080a      | 4.25E-03 | 1.61        | down | SYTL3                |
| 8173955a      | 8.45E-06 | 2.04        | down | SYTL4                |
| 7916584a      | 2.77E-02 | 1.61        | down | TACSTD2              |
| 8020702a      | 8.44E-03 | 1.50        | up   | TAF4B                |
| 8094476a      | 1.45E-05 | 2.39        | down | TBC1D19              |
| 7990657a      | 6.88E-04 | 1.52        | down | TBC1D2B              |
| 7985224a      | 1.44E-03 | 1.66        | down | TBC1D2B;LOC646938    |
| 8169186a      | 4.84E-03 | 1.55        | down | TBC1D8B              |
| 8102912a      | 5.37E-05 | 1.77        | down | TBC1D9               |
| 8102171a      | 1.47E-03 | 1.75        | down | TBCK                 |
| 8169049a      | 1.51E-04 | 1.53        | down | TCEAL1               |
| 8169035a      | 1.29E-05 | 1.52        | down | TCEAL4               |
| 8174134a      | 6.83E-06 | 1.63        | down | TCEAL6;TCEAL3;TCEAL2 |
| 8109254a      | 4.80E-04 | 1.50        | up   | TCOF1                |
| 8135576a      | 1.41E-03 | 2.36        | down | TES                  |
| 8096675a      | 8.55E-04 | 1.82        | down | TET2                 |
| 8096669a      | 6.16E-04 | 1.70        | down | TET2                 |
| 8063536a      | 2.55E-05 | 6.05        | up   | TFAP2C               |
| 7999102a      | 2.35E-04 | 1.63        | up   | TFAP4                |
| 8057599a      | 3.20E-05 | 2.48        | down | TFPI                 |
| 8037005a      | 3.40E-04 | 1.80        | down | TGFB1                |
| 7909789a      | 5.27E-04 | 1.91        | down | TGFB2                |
| 8108217a      | 1.92E-04 | 1.86        | down | TGFBI                |
| 8078350a      | 1.18E-04 | 2.59        | down | TGFBR2               |
| 8168646a      | 2.96E-03 | 2.94        | up   | TGIF2LX;TGIF2LY      |
| 8066214a      | 3.38E-03 | 2.75        | up   | TGM2                 |
| 8065353a      | 6.97E-05 | 1.87        | down | THBD                 |
| 8085797a      | 7.14E-04 | 2.05        | down | THRB                 |
| 7952869a      | 1.10E-05 | 1.54        | down | THYN1                |
| 8122933a      | 8.55E-04 | 1.68        | down | TIAM2                |
| 8102362a      | 4.45E-04 | 1.63        | down | TIFA                 |
| 8072626a      | 8.94E-06 | 9.68        | up   | TIMP3                |
| 8075635a      | 6.26E-05 | 3.39        | up   | TIMP3                |
| 8001818a      | 5.30E-04 | 1.95        | down | TK2                  |
| 8156060a      | 3.39E-03 | 1.69        | up   | TLE4                 |
| 8098214a      | 8.57E-06 | 7.28        | down | TLL1                 |
| 8098611a      | 3.16E-04 | 2.35        | down | TLR3                 |
| 8157524a      | 5.71E-03 | 5.34        | down | TLR4                 |
| 8109969a      | 1.54E-03 | 1.73        | up   | TLX3                 |
| 7991630a      | 4.77E-04 | 1.56        | down | TM2D3                |
| 8015900a      | 2.00E-03 | 1.56        | up   | TMEM101              |
| 8099099a      | 4.30E-05 | 1.57        | down | TMEM128              |
| 8098041a      | 4.55E-03 | 1.86        | up   | TMEM144              |
| 8120239a      | 3.59E-03 | 1.73        | down | TMEM14A              |
| 8099850a      | 6.91E-05 | 3.29        | down | TMEM156              |
| 8106170a      | 2.07E-02 | 1.55        | up   | TMEM171              |



| Transcript ID | p-value  | Fold Change | Reg  | Gene Symbol    |
|---------------|----------|-------------|------|----------------|
| 8044844a      | 7.40E-05 | 1.50        | up   | TMEM177        |
| 7999317a      | 5.49E-04 | 1.53        | up   | TMEM186        |
| 7897469a      | 2.47E-05 | 1.85        | up   | TMEM201        |
| 8154760a      | 2.61E-05 | 2.70        | up   | TMEM215        |
| 7952484a      | 3.92E-04 | 1.55        | down | TMEM218        |
| 8157092a      | 3.20E-03 | 1.84        | up   | TMEM38B        |
| 8089759a      | 4.48E-04 | 1.53        | up   | TMEM39A        |
| 8081288a      | 5.79E-03 | 1.83        | down | TMEM45A        |
| 7903162a      | 2.17E-03 | 1.70        | down | TMEM56         |
| 8006415a      | 1.65E-02 | 2.91        | up   | TMEM98         |
| 8176255a      | 7.53E-05 | 2.05        | down | TMLHE          |
| 7983734a      | 6.62E-04 | 2.77        | down | TMOD2          |
| 7983744a      | 7.05E-05 | 1.77        | down | TMOD3          |
| 8169073a      | 3.37E-05 | 2.44        | down | TMSB15B;H2BFXP |
| 8064939a      | 2.61E-02 | 1.77        | down | TMX4           |
| 8107520a      | 7.14E-04 | 2.00        | down | TNFAIP8        |
| 7988763a      | 5.76E-05 | 2.61        | down | TNFAIP8L3      |
| 8152512a      | 2.85E-02 | 2.62        | up   | TNFRSF11B      |
| 8126839a      | 1.72E-02 | 2.06        | down | TNFRSF21       |
| 8092095a      | 4.58E-03 | 2.14        | up   | TNIK           |
| 8058869a      | 1.30E-04 | 2.13        | down | TNS1           |
| 8150962a      | 5.17E-03 | 4.16        | up   | TOX            |
| 8050702a      | 6.06E-03 | 1.54        | down | TP53I3         |
| 8151890a      | 4.37E-04 | 1.70        | down | TP53INP1       |
| 7958960a      | 9.40E-03 | 1.86        | up   | TPCN1          |
| 8151475a      | 1.92E-04 | 1.63        | up   | TPD52          |
| 8143643a      | 2.20E-05 | 1.57        | down | TPK1           |
| 7984079a      | 2.12E-04 | 1.69        | down | TPM1           |
| 8153175a      | 8.42E-04 | 1.57        | down | TRAPPC9        |
| 8040365a      | 4.87E-05 | 2.28        | down | TRIB2          |
| 8162729a      | 2.88E-05 | 1.55        | up   | TRIM14         |
| 8005475a      | 4.76E-02 | 1.64        | down | TRIM16L        |
| 8136473a      | 2.18E-04 | 1.52        | up   | TRIM24         |
| 8113577a      | 1.04E-02 | 1.57        | up   | TRIM36         |
| 8146669a      | 1.28E-02 | 1.75        | down | TRIM55         |
| 7911218a      | 6.84E-03 | 2.03        | up   | TRIM58;OR2W3   |
| 8091757a      | 6.22E-03 | 1.53        | up   | TRIM59         |
| 7984190a      | 6.64E-05 | 1.61        | down | TRIP4          |
| 8077353a      | 4.42E-03 | 1.59        | down | TRNT1          |
| 7971104a      | 1.24E-04 | 7.80        | down | TRPC4          |
| 7988713a      | 1.04E-05 | 1.53        | down | TRPM7          |
| 8174361a      | 3.53E-05 | 1.89        | down | TSC22D3        |
| 8142524a      | 2.88E-02 | 1.54        | up   | TSPAN12        |
| 8131600a      | 3.81E-04 | 2.62        | up   | TSPAN13        |
| 7928046a      | 5.20E-04 | 2.13        | down | TSPAN15        |
| 8101828a      | 5.69E-03 | 1.64        | down | TSPAN5         |

| Transcript ID | p-value  | Fold Change | Reg  | Gene Symbol     |
|---------------|----------|-------------|------|-----------------|
| 7953166a      | 1.59E-04 | 1.60        | up   | TSPAN9          |
| 8011245a      | 1.74E-05 | 1.50        | up   | TSR1;SRR        |
| 8153474a      | 2.22E-03 | 1.65        | down | TSTA3           |
| 7991485a      | 9.41E-05 | 1.53        | down | TTC23           |
| 8136495a      | 7.53E-05 | 1.86        | up   | TTC26           |
| 8075142a      | 1.33E-02 | 1.51        | down | TTC28;LOC284900 |
| 8113157a      | 4.60E-03 | 1.58        | down | TTC37           |
| 7917199a      | 7.78E-03 | 1.56        | down | TTLL7           |
| 7963054a      | 8.97E-04 | 2.21        | down | TUBA1A          |
| 8059177a      | 4.61E-05 | 2.20        | down | TUBA4A          |
| 8007312a      | 1.39E-04 | 1.59        | up   | TUBG2           |
| 7905428a      | 6.24E-04 | 1.60        | down | TUFT1           |
| 8023450a      | 1.77E-03 | 1.52        | down | TXNL1           |
| 7990054a      | 5.89E-05 | 1.72        | down | UACA            |
| 8087485a      | 7.07E-04 | 1.53        | down | UBA7            |
| 8102024a      | 1.11E-02 | 1.65        | down | UBE2D3          |
| 8176098a      | 1.03E-04 | 1.78        | down | UBL4A           |
| 7987981a      | 7.18E-05 | 1.52        | down | UBR1            |
| 7950307a      | 3.50E-05 | 2.59        | up   | UCP2            |
| 7906662a      | 4.67E-04 | 1.70        | down | UFC1            |
| 8111524a      | 9.83E-03 | 1.59        | up   | UGT3A2          |
| 8097017a      | 2.64E-06 | 6.42        | up   | UGT8            |
| 8122724a      | 1.09E-03 | 2.27        | up   | ULBP1           |
| 8095868a      | 2.83E-03 | 1.65        | down | UNQ3028         |
| 7960362a      | 2.67E-03 | 1.61        | up   | UNQ3104         |
| 7952451a      | 7.25E-04 | 1.59        | down | UNQ565          |
| 8069943a      | 2.23E-03 | 1.51        | up   | URB1            |
| 7997633a      | 1.17E-04 | 1.52        | up   | USP10           |
| 7970696a      | 3.66E-03 | 1.57        | down | USP12           |
| 8158568a      | 8.42E-04 | 1.52        | up   | USP20           |
| 8067903a      | 1.16E-05 | 1.87        | down | USP25           |
| 7951752a      | 7.92E-04 | 1.53        | up   | USP28           |
| 8166826a      | 5.35E-05 | 1.63        | down | USP9X           |
| 8176578a      | 1.06E-04 | 7.84        | down | USP9Y           |
| 8122464a      | 2.05E-04 | 1.64        | down | UTRN            |
| 8177137a      | 3.09E-04 | 6.17        | down | UTY             |
| 8176962a      | 1.72E-05 | 1.57        | down | VAMP7           |
| 7992967a      | 9.49E-05 | 1.70        | down | VASN            |
| 8171013a      | 4.66E-05 | 1.63        | down | VBP1            |
| 8106743a      | 4.61E-02 | 1.65        | up   | VCAN            |
| 7962689a      | 4.63E-03 | 1.54        | down | VDR             |
| 8154100a      | 1.27E-02 | 1.66        | down | VLDLR           |
| 8153776a      | 6.20E-05 | 1.61        | down | VPS28           |
| 7971820a      | 1.62E-04 | 1.51        | down | VPS36           |
| 8138277a      | 1.23E-03 | 1.68        | up   | VWDE            |
| 8138258a      | 1.18E-02 | 1.52        | up   | VWDE            |

| Transcript ID | p-value  | Fold Change | Reg  | Gene Symbol  |
|---------------|----------|-------------|------|--------------|
| 8169022a      | 5.86E-05 | 1.68        | down | WBP5         |
| 8098379a      | 1.62E-03 | 2.40        | up   | WDR17        |
| 8094638a      | 1.09E-03 | 1.52        | down | WDR19        |
| 8070615a      | 1.07E-03 | 1.51        | up   | WDR4         |
| 8112746a      | 7.25E-04 | 1.66        | down | WDR41        |
| 7990700a      | 9.07E-05 | 1.51        | down | WDR61        |
| 7959330a      | 6.21E-05 | 1.72        | up   | WDR66        |
| 8021312a      | 2.57E-03 | 1.72        | down | WDR7         |
| 8104998a      | 4.02E-03 | 1.50        | up   | WDR70        |
| 8088180a      | 8.22E-03 | 4.13        | up   | WNT5A        |
| 8073311a      | 1.92E-03 | 1.58        | up   | XPNPEP3      |
| 8173752a      | 1.79E-02 | 2.04        | down | ZCCHC5       |
| 8144758a      | 1.98E-03 | 1.53        | down | ZDHHC2       |
| 7926916a      | 8.45E-06 | 3.22        | down | ZEB1         |
| 8147000a      | 7.99E-04 | 2.38        | down | ZFHX4        |
| 8176384a      | 3.48E-04 | 8.28        | down | ZFY          |
| 7901426a      | 6.31E-05 | 1.66        | up   | ZFYVE9       |
| 8170602a      | 2.75E-02 | 1.72        | down | ZNF185       |
| 8153935a      | 7.66E-04 | 1.79        | down | ZNF252       |
| 8027241a      | 1.93E-02 | 1.89        | up   | ZNF253;ZNF93 |
| 7951838a      | 4.91E-05 | 1.53        | up   | ZNF259       |
| 8074845a      | 4.56E-03 | 1.90        | down | ZNF280B      |
| 7989159a      | 2.21E-04 | 1.61        | down | ZNF280D      |
| 8115196a      | 1.17E-03 | 8.33        | down | ZNF300       |
| 7933186a      | 4.14E-04 | 2.28        | down | ZNF32        |
| 8039006a      | 3.69E-03 | 1.88        | up   | ZNF320       |
| 8066745a      | 1.85E-04 | 1.61        | down | ZNF334       |
| 8039054a      | 2.43E-04 | 2.74        | up   | ZNF347       |
| 8037355a      | 1.65E-04 | 1.55        | down | ZNF428       |
| 8035813a      | 8.63E-03 | 2.75        | up   | ZNF43        |
| 8034393a      | 8.06E-03 | 1.66        | down | ZNF443       |
| 8157193a      | 9.01E-04 | 1.79        | up   | ZNF483       |
| 8079224a      | 1.02E-02 | 1.59        | down | ZNF502       |
| 8035773a      | 1.23E-02 | 4.40        | up   | ZNF506       |
| 8023882a      | 8.87E-06 | 2.13        | down | ZNF516       |
| 7929562a      | 2.09E-04 | 1.63        | down | ZNF518A      |
| 8099364a      | 8.57E-06 | 3.20        | up   | ZNF518B      |
| 8030931a      | 4.41E-03 | 1.89        | up   | ZNF528       |
| 8024527a      | 1.52E-04 | 2.00        | up   | ZNF556       |
| 8148276a      | 1.43E-03 | 1.94        | up   | ZNF572       |
| 8113761a      | 4.57E-04 | 2.36        | down | ZNF608       |
| 8038952a      | 2.05E-03 | 1.57        | down | ZNF616       |
| 8035795a      | 9.03E-04 | 2.05        | up   | ZNF626       |
| 8039680a      | 5.38E-04 | 1.66        | up   | ZNF671       |
| 8039070a      | 2.76E-02 | 1.53        | up   | ZNF677       |
| 8030950a      | 1.73E-04 | 2.18        | up   | ZNF701       |

| Transcript ID | p-value  | Fold Change | Reg  | Gene Symbol                                    |
|---------------|----------|-------------|------|------------------------------------------------|
| 8039025a      | 2.08E-03 | 1.85        | up   | ZNF702P                                        |
| 8168589a      | 8.57E-06 | 6.99        | up   | ZNF711                                         |
| 8027363a      | 2.57E-02 | 1.70        | up   | ZNF726                                         |
| 8027348a      | 8.96E-03 | 4.02        | down | ZNF730                                         |
| 8098745a      | 4.37E-03 | 2.25        | up   | ZNF732                                         |
| 8035793a      | 7.05E-05 | 3.06        | up   | ZNF737                                         |
| 8027297a      | 2.97E-02 | 1.57        | up   | ZNF738                                         |
| 8175319a      | 1.34E-04 | 1.69        | down | ZNF75D                                         |
| 7997904a      | 3.26E-03 | 1.65        | up   | ZNF778                                         |
| 8025992a      | 1.67E-04 | 5.37        | up   | ZNF788                                         |
| 8046815a      | 2.14E-03 | 4.67        | up   | ZNF804A                                        |
| 8039692a      | 9.45E-04 | 1.90        | up   | ZNF814;ZNF552;ZNF587;LOC100288322;LOC100293516 |
| 8103025a      | 5.75E-04 | 1.86        | down | ZNF827                                         |
| 8038967a      | 2.47E-05 | 1.88        | up   | ZNF83                                          |
| 8093332a      | 2.67E-02 | 1.69        | up   | ZNF876P                                        |
| 8027254a      | 5.76E-04 | 1.57        | up   | ZNF90;ZNF93                                    |
| 8027247a      | 2.63E-04 | 7.70        | up   | ZNF93                                          |
| 8039730a      | 5.26E-04 | 1.52        | up   | ZSCAN18                                        |
| 8031629a      | 1.59E-04 | 1.79        | up   | ZSCAN5C                                        |
| 7901497a      | 4.50E-07 | 2.49        | up   | ZYG11A                                         |

Complete list of all genes meeting t-test comparison between metal-transformed clones and their control clones with p-value less than or equal to 0.05 and a fold-change cut-off of greater than or equal to 1.50

Supplementary Table 4 Differentially Expressed Genes in Ni-Transformed Clones

| Transcript ID | p-value  | Fold Change | Reg  | Gene Symbol                                |
|---------------|----------|-------------|------|--------------------------------------------|
| 8142554a      | 1.30E-02 | 2.07        | down | AASS                                       |
| 8018038a      | 3.19E-04 | 2.32        | up   | ABCA5                                      |
| 8008454a      | 2.55E-03 | 2.37        | up   | ABCC3                                      |
| 8065469a      | 6.37E-05 | 1.94        | down | ABHD12                                     |
| 8089145a      | 5.55E-04 | 5.09        | up   | ABI3BP                                     |
| 7936463a      | 1.88E-02 | 1.65        | down | ABLIM1                                     |
| 7932214a      | 2.21E-02 | 1.55        | down | ACBD7                                      |
| 8117219a      | 2.07E-03 | 1.53        | up   | ACOT13                                     |
| 7975607a      | 2.85E-04 | 1.90        | down | ACOT4                                      |
| 8083075a      | 2.23E-02 | 1.66        | down | ACPL2                                      |
| 7930498a      | 4.97E-03 | 2.46        | down | ACSL5                                      |
| 8062041a      | 2.06E-04 | 1.78        | up   | ACSS2                                      |
| 8056005a      | 6.39E-05 | 1.54        | up   | ACVR1                                      |
| 8066431a      | 4.36E-03 | 1.51        | up   | ADA                                        |
| 7936968a      | 1.83E-02 | 2.65        | down | ADAM12                                     |
| 8146024a      | 1.28E-03 | 2.06        | down | ADAM32                                     |
| 8111387a      | 3.78E-03 | 2.64        | down | ADAMTS12                                   |
| 8100870a      | 6.37E-05 | 5.07        | down | ADAMTS3                                    |
| 8154491a      | 2.30E-04 | 5.12        | down | ADAMTSL1                                   |
| 8154512a      | 6.41E-05 | 2.65        | down | ADAMTSL1                                   |
| 7985522a      | 7.88E-03 | 2.18        | down | ADAMTSL3                                   |
| 8136591a      | 7.24E-05 | 1.89        | up   | ADCK2                                      |
| 7938390a      | 4.90E-02 | 1.67        | down | ADM                                        |
| 8071899a      | 2.00E-03 | 1.59        | up   | ADORA2A;CYTSA                              |
| 7936439a      | 6.60E-04 | 2.26        | down | AFAP1L2                                    |
| 8054254a      | 1.13E-02 | 2.12        | up   | AFF3                                       |
| 8040774a      | 1.53E-04 | 1.65        | up   | AGBL5                                      |
| 7912659a      | 2.64E-03 | 1.75        | down | AGMAT                                      |
| 8096116a      | 2.53E-02 | 1.80        | up   | AGPAT9                                     |
| 8162086a      | 9.23E-03 | 1.65        | down | AGTPBP1                                    |
| 7962183a      | 4.13E-03 | 2.06        | down | AK3L1                                      |
| 7968835a      | 1.14E-03 | 1.68        | down | AKAP11                                     |
| 7925904a      | 8.24E-03 | 1.54        | down | AKR1CL2                                    |
| 7965979a      | 1.86E-02 | 1.99        | down | ALDH1L2                                    |
| 8005638a      | 1.20E-03 | 1.56        | up   | ALDH3A2                                    |
| 8117207a      | 1.43E-03 | 2.03        | up   | ALDH5A1                                    |
| 8013660a      | 2.97E-02 | 1.90        | up   | ALDOC                                      |
| 7971027a      | 5.10E-03 | 1.61        | down | ALG5                                       |
| 8023528a      | 5.55E-04 | 2.06        | down | ALPK2                                      |
| 8111101a      | 8.30E-03 | 1.95        | up   | ANKH                                       |
| 7934979a      | 1.41E-03 | 6.63        | down | ANKRD1                                     |
| 8161388a      | 2.04E-03 | 2.12        | up   | ANKRD20A1-5;ANKRD20B;LOC375010             |
| 8053744a      | 3.03E-03 | 2.38        | up   | ANKRD20B;ANKRD20A1-5;FLJ43315              |
| 8161384a      | 4.44E-02 | 1.71        | up   | ANKRD20B;CCDC29;RP11-195B21.3;LOC100289454 |
| 8155591a      | 2.60E-03 | 2.93        | up   | ANKRD20B;RP11-195B21.3;CCDC29              |

| Transcript ID | p-value  | Fold Change | Reg  | Gene Symbol       |
|---------------|----------|-------------|------|-------------------|
| 8069499a      | 1.02E-02 | 1.91        | up   | ANKRD30B          |
| 8020357a      | 3.29E-02 | 1.63        | up   | ANKRD30B          |
| 8121095a      | 1.38E-03 | 1.84        | up   | ANKRD6            |
| 7960438a      | 4.17E-06 | 4.31        | down | ANO2              |
| 8042439a      | 2.60E-03 | 1.53        | up   | ANTXR1            |
| 8101260a      | 1.92E-02 | 2.13        | down | ANTXR2            |
| 8095986a      | 3.19E-03 | 1.65        | down | ANXA3             |
| 8047300a      | 4.50E-03 | 2.82        | down | AOX1              |
| 7982187a      | 2.45E-03 | 2.98        | up   | APBA2             |
| 8073062a      | 2.69E-03 | 1.57        | up   | APOBEC3B          |
| 8073072a      | 1.55E-02 | 1.56        | up   | APOBEC3D          |
| 8073088a      | 9.81E-05 | 2.61        | up   | APOBEC3G          |
| 8072710a      | 2.49E-02 | 1.77        | up   | APOL6             |
| 8167998a      | 2.16E-03 | 2.04        | up   | AR                |
| 8099760a      | 1.32E-02 | 2.01        | down | ARAP2             |
| 8095744a      | 4.77E-02 | 2.22        | down | AREG              |
| 8129458a      | 3.54E-03 | 2.49        | up   | ARHGAP18          |
| 7973840a      | 3.39E-04 | 1.59        | down | ARHGAP5           |
| 8110158a      | 1.57E-07 | 2.89        | down | ARL10             |
| 8168868a      | 3.87E-04 | 1.50        | down | ARMCX1            |
| 8174092a      | 1.40E-02 | 1.60        | down | ARMCX2            |
| 8168855a      | 5.38E-04 | 1.58        | down | ARMCX4            |
| 7985285a      | 3.20E-04 | 1.89        | up   | ARNT2             |
| 7950473a      | 9.31E-03 | 1.79        | up   | ARRB1             |
| 8171148a      | 3.66E-03 | 1.67        | up   | ARSD              |
| 8177011a      | 5.90E-04 | 1.79        | up   | ASMTL             |
| 8158671a      | 2.73E-02 | 1.62        | up   | ASS1              |
| 7974270a      | 5.99E-03 | 2.24        | down | ATL1              |
| 7948995a      | 1.94E-03 | 1.54        | down | ATL3              |
| 7970162a      | 9.80E-04 | 1.69        | down | ATP11A            |
| 7908940a      | 2.20E-04 | 2.11        | down | ATP2B4            |
| 7905754a      | 1.49E-04 | 1.65        | down | ATP8B2            |
| 8067055a      | 3.03E-04 | 1.99        | up   | ATP9A             |
| 8060627a      | 1.54E-04 | 2.02        | down | ATRN              |
| 8124040a      | 8.91E-03 | 1.74        | up   | ATXN1             |
| 8142100a      | 2.25E-03 | 1.50        | up   | ATXN7L1           |
| 8133233a      | 3.44E-04 | 2.33        | up   | AUTS2             |
| 8084206a      | 4.40E-02 | 1.93        | up   | B3GNT5            |
| 8001932a      | 3.54E-03 | 1.81        | down | B3GNT9;C16orf70   |
| 7964484a      | 1.86E-02 | 1.52        | up   | B4GALNT1;SLC26A10 |
| 8141206a      | 2.03E-04 | 3.91        | up   | BAIAP2L1          |
| 8046147a      | 2.90E-02 | 1.72        | up   | BBS5;KBTBD10      |
| 8093219a      | 3.00E-04 | 2.38        | down | BDH1              |
| 8174201a      | 6.18E-04 | 9.39        | down | BEX1              |
| 8169009a      | 3.05E-02 | 1.55        | down | BEX4              |
| 8077441a      | 2.13E-02 | 1.67        | up   | BHLHE40           |

| Transcript ID | p-value  | Fold Change | Reg  | Gene Symbol       |
|---------------|----------|-------------|------|-------------------|
| 7927681a      | 7.17E-04 | 3.89        | down | BICC1             |
| 8054945a      | 5.14E-04 | 1.57        | up   | BIN1              |
| 7926609a      | 1.91E-04 | 1.89        | down | BMI1              |
| 7979241a      | 1.94E-02 | 2.00        | up   | BMP4              |
| 8132250a      | 7.30E-04 | 2.19        | down | BMPER             |
| 8171006a      | 1.28E-03 | 1.58        | down | BRCC3             |
| 8032380a      | 1.79E-03 | 1.51        | up   | BTBD2             |
| 8060988a      | 9.89E-05 | 1.82        | down | BTBD3             |
| 7965423a      | 1.77E-04 | 1.69        | up   | BTG1              |
| 8117458a      | 1.43E-02 | 1.51        | up   | BTN3A1            |
| 7932542a      | 6.52E-03 | 1.52        | down | C10orf67          |
| 7944751a      | 2.61E-04 | 1.83        | up   | C11orf63          |
| 7954711a      | 4.28E-04 | 1.53        | up   | C12orf35          |
| 7953936a      | 3.46E-03 | 4.75        | up   | C12orf59          |
| 7968351a      | 3.14E-05 | 3.58        | down | C13orf33          |
| 7970989a      | 3.19E-02 | 1.70        | down | C13orf38;SOHLH2   |
| 8000932a      | 1.02E-04 | 1.52        | up   | C16orf93          |
| 8022310a      | 4.67E-06 | 12.43       | up   | C18orf58          |
| 8028325a      | 2.71E-03 | 1.52        | down | C19orf33;YIF1B    |
| 7963061a      | 1.88E-04 | 2.00        | up   | C1QL4             |
| 7960744a      | 6.45E-04 | 1.90        | up   | C1R               |
| 7953603a      | 6.28E-03 | 2.17        | up   | C1S               |
| 8065612a      | 4.80E-04 | 1.67        | up   | C20orf112         |
| 8061305a      | 1.03E-03 | 1.51        | down | C20orf19          |
| 8064637a      | 1.40E-05 | 2.43        | down | C20orf194         |
| 8065433a      | 1.60E-04 | 2.51        | down | C20orf3           |
| 8064833a      | 9.78E-04 | 1.50        | down | C20orf30          |
| 8061019a      | 7.12E-05 | 2.10        | down | C20orf7           |
| 8061129a      | 9.81E-05 | 2.01        | down | C20orf72          |
| 8065280a      | 1.06E-02 | 1.64        | down | C20orf74          |
| 8060977a      | 3.41E-03 | 1.71        | down | C20orf94          |
| 8068202a      | 2.09E-03 | 2.07        | up   | C21orf63          |
| 8071301a      | 1.37E-03 | 1.53        | up   | C22orf25          |
| 8096905a      | 2.04E-03 | 1.50        | down | C4orf16           |
| 8102831a      | 3.07E-02 | 1.77        | up   | C4orf49           |
| 8113504a      | 2.55E-03 | 2.32        | down | C5orf13           |
| 8110147a      | 2.43E-03 | 2.48        | up   | C5orf25           |
| 8125850a      | 3.93E-05 | 1.60        | up   | C6orf106          |
| 8126095a      | 2.78E-03 | 1.56        | up   | C6orf129          |
| 8126382a      | 9.23E-04 | 1.79        | down | C6orf132          |
| 8128371a      | 1.35E-03 | 1.93        | up   | C6orf168          |
| 8129392a      | 9.18E-03 | 2.14        | down | C6orf174;KIAA0408 |
| 8129649a      | 3.69E-02 | 1.52        | up   | C6orf192          |
| 8179808a      | 1.61E-04 | 1.61        | up   | C6orf47           |
| 8137219a      | 4.22E-03 | 1.60        | down | C7orf29           |
| 8138647a      | 7.96E-04 | 1.78        | up   | C7orf31           |

| Transcript ID | p-value  | Fold Change | Reg  | Gene Symbol     |
|---------------|----------|-------------|------|-----------------|
| 8131881a      | 1.95E-04 | 2.53        | down | C7orf46         |
| 8134051a      | 5.85E-03 | 1.61        | up   | C7orf63         |
| 8149315a      | 4.28E-04 | 2.01        | down | C8orf15         |
| 8154381a      | 6.31E-04 | 2.61        | up   | C9orf150        |
| 8147112a      | 5.36E-03 | 2.16        | down | CA13            |
| 8155083a      | 9.20E-03 | 1.57        | down | CA9             |
| 8020495a      | 1.10E-02 | 1.83        | up   | CABLES1         |
| 7901993a      | 2.76E-04 | 3.12        | up   | CACHD1          |
| 7962112a      | 2.06E-03 | 1.55        | up   | CAPRIN2         |
| 8172158a      | 4.88E-04 | 1.61        | down | CASK            |
| 8089261a      | 1.24E-02 | 1.96        | up   | CBLB            |
| 8010320a      | 1.59E-05 | 1.68        | up   | CBX2            |
| 7903049a      | 4.28E-04 | 1.66        | down | CCDC18          |
| 7932082a      | 6.03E-03 | 1.81        | up   | CCDC3           |
| 8023401a      | 3.22E-04 | 3.09        | up   | CCDC68          |
| 7899346a      | 4.96E-02 | 1.58        | down | CCDC72          |
| 8055173a      | 3.41E-05 | 1.70        | up   | CCDC74A;CCDC74B |
| 8089544a      | 7.17E-04 | 2.74        | down | CCDC80          |
| 7980828a      | 1.91E-02 | 2.30        | up   | CCDC88C         |
| 8111932a      | 3.24E-03 | 2.11        | down | CCL28           |
| 8081657a      | 1.39E-02 | 2.21        | down | CD200           |
| 8154233a      | 2.05E-03 | 2.03        | down | CD274           |
| 8004510a      | 4.01E-03 | 1.73        | up   | CD68            |
| 8115147a      | 4.82E-05 | 1.88        | down | CD74            |
| 7939546a      | 2.86E-02 | 1.54        | up   | CD82            |
| 8176360a      | 3.02E-04 | 1.92        | up   | CD99            |
| 8060675a      | 1.24E-03 | 1.52        | down | CDC25B          |
| 7997504a      | 1.27E-03 | 2.29        | down | CDH13           |
| 7996819a      | 3.79E-04 | 1.54        | down | CDH3            |
| 7997982a      | 1.54E-04 | 1.67        | up   | CDK10           |
| 8140955a      | 1.94E-04 | 1.75        | down | CDK6            |
| 8101031a      | 9.20E-03 | 1.66        | up   | CDKL2           |
| 8166289a      | 2.55E-03 | 1.77        | down | CDKL5           |
| 8113641a      | 3.21E-02 | 1.51        | down | CDO1            |
| 8060772a      | 6.14E-04 | 1.61        | down | CDS2            |
| 7997839a      | 5.47E-05 | 1.92        | up   | CDT1            |
| 8003553a      | 2.24E-05 | 2.48        | up   | CENPBD1         |
| 7904883a      | 2.90E-04 | 1.62        | down | CHD1L           |
| 8003467a      | 6.53E-04 | 1.61        | up   | CHMP1A          |
| 8174513a      | 1.78E-02 | 2.93        | down | CHRD1           |
| 7987012a      | 1.56E-03 | 2.17        | up   | CHRFAM7A;CHRNA7 |
| 7958202a      | 5.42E-03 | 2.40        | down | CHST11          |
| 7936856a      | 2.08E-03 | 1.53        | down | CHST15          |
| 7981427a      | 6.20E-04 | 2.55        | down | CKB             |
| 8165974a      | 1.76E-03 | 1.66        | up   | CLCN4           |
| 8083887a      | 1.44E-03 | 1.54        | up   | CLDN11          |



| Transcript ID | p-value  | Fold Change | Reg  | Gene Symbol                    |
|---------------|----------|-------------|------|--------------------------------|
| 8133459a      | 1.46E-04 | 1.51        | up   | CLIP2                          |
| 8110971a      | 6.15E-04 | 1.60        | up   | CMBL                           |
| 7997427a      | 1.91E-03 | 1.66        | up   | CMIP                           |
| 8025918a      | 2.49E-03 | 1.91        | down | CNN1                           |
| 7929732a      | 1.30E-03 | 1.94        | down | CNNM1                          |
| 8007323a      | 2.82E-03 | 1.54        | down | CNTNAP1                        |
| 8161288a      | 2.20E-02 | 1.56        | up   | CNTNAP3;RP11-138L21.1;CNTNAP3B |
| 7973797a      | 4.11E-04 | 2.64        | down | COCH;STRN3                     |
| 8127563a      | 7.68E-03 | 2.10        | down | COL12A1                        |
| 7972750a      | 7.16E-03 | 1.56        | down | COL4A1                         |
| 8057620a      | 4.06E-03 | 3.32        | up   | COL5A2                         |
| 8081235a      | 2.05E-03 | 2.58        | down | COL8A1                         |
| 7926596a      | 8.23E-06 | 1.88        | down | COMMD3;BMI1                    |
| 7984475a      | 2.91E-02 | 1.77        | down | CORO2B                         |
| 8003217a      | 1.52E-04 | 1.76        | up   | COX4NB                         |
| 8098204a      | 1.02E-03 | 2.94        | down | CPE                            |
| 7935011a      | 2.00E-04 | 1.66        | down | CPEB3                          |
| 7999553a      | 6.09E-03 | 1.61        | up   | CPPED1                         |
| 8030448a      | 1.69E-03 | 2.99        | down | CPT1C                          |
| 8138805a      | 1.98E-02 | 2.27        | up   | CPVL                           |
| 7921099a      | 8.40E-04 | 1.51        | down | CRABP2                         |
| 8131996a      | 4.33E-03 | 2.18        | down | CREB5                          |
| 8060839a      | 4.02E-04 | 1.70        | down | CRLS1                          |
| 8065256a      | 4.29E-04 | 1.65        | down | CRNKL1                         |
| 8081171a      | 5.78E-04 | 2.12        | down | CRYBG3;MINA                    |
| 8064351a      | 1.94E-04 | 1.66        | down | CSNK2A1;CSNK2A1P               |
| 7946655a      | 9.54E-05 | 1.84        | down | CSNK2A1P                       |
| 7990545a      | 5.17E-03 | 2.38        | down | CSPG4                          |
| 8061138a      | 6.41E-05 | 2.43        | down | CSRP2BP                        |
| 7902290a      | 2.58E-03 | 1.70        | down | CTH                            |
| 8163063a      | 2.21E-03 | 1.51        | down | CTNNA1                         |
| 7950906a      | 3.08E-02 | 1.83        | down | CTSC                           |
| 7949650a      | 6.24E-04 | 1.75        | down | CTSF                           |
| 8067955a      | 2.58E-03 | 2.29        | down | CXADR                          |
| 8011713a      | 2.42E-03 | 2.33        | up   | CXCL16                         |
| 8049471a      | 2.59E-04 | 2.25        | down | CXCR7                          |
| 8172110a      | 3.44E-04 | 1.59        | down | CXorf38                        |
| 8003322a      | 5.70E-03 | 1.90        | up   | CYBA                           |
| 8018754a      | 2.83E-04 | 2.08        | down | CYGB                           |
| 8051583a      | 4.42E-03 | 4.93        | down | CYP1B1                         |
| 8048432a      | 6.17E-04 | 1.60        | up   | CYP27A1                        |
| 8096744a      | 2.44E-04 | 1.58        | down | CYP2U1                         |
| 7974689a      | 5.64E-04 | 1.86        | down | DACT1                          |
| 8156199a      | 1.25E-03 | 2.51        | down | DAPK1                          |
| 8089082a      | 4.44E-04 | 1.64        | down | DCBLD2                         |
| 8097753a      | 9.70E-04 | 2.07        | up   | DCLK2                          |

| Transcript ID | p-value  | Fold Change | Reg  | Gene Symbol |
|---------------|----------|-------------|------|-------------|
| 8179819a      | 5.71E-05 | 2.13        | up   | DDAH2       |
| 8128843a      | 2.03E-03 | 2.29        | up   | DDO         |
| 8117900a      | 3.00E-02 | 1.76        | up   | DDR1        |
| 8179184a      | 5.46E-05 | 1.54        | up   | DDR1        |
| 7906878a      | 2.49E-02 | 2.36        | up   | DDR2        |
| 8064601a      | 2.19E-04 | 1.73        | down | DDRGK1      |
| 8103601a      | 1.36E-02 | 1.73        | down | DDX60L      |
| 7998072a      | 1.73E-04 | 1.60        | up   | DEF8        |
| 7923131a      | 1.74E-02 | 2.58        | up   | DENND1B     |
| 7923141a      | 9.99E-03 | 2.48        | up   | DENND1B     |
| 7918487a      | 1.32E-02 | 1.64        | down | DENND2D     |
| 7956046a      | 5.00E-03 | 1.71        | down | DGKA        |
| 7968800a      | 9.54E-05 | 1.93        | down | DGKH        |
| 8143154a      | 1.29E-02 | 2.40        | down | DGKI;DGKi   |
| 8006655a      | 4.69E-02 | 1.51        | up   | DHRS11      |
| 8168691a      | 3.10E-02 | 1.63        | down | DIAPH2      |
| 7980485a      | 2.73E-02 | 2.09        | up   | DIO2        |
| 8046373a      | 2.67E-04 | 1.87        | up   | DLX1        |
| 8056784a      | 3.94E-03 | 1.86        | up   | DLX2        |
| 8131719a      | 2.03E-02 | 2.20        | up   | DNAH11      |
| 7985147a      | 5.42E-05 | 3.98        | down | DNAJA4      |
| 7932512a      | 2.61E-04 | 1.56        | down | DNAJC1      |
| 7900159a      | 1.75E-04 | 1.67        | down | DNALI1      |
| 7907370a      | 1.61E-04 | 2.75        | down | DNM3        |
| 8059413a      | 2.76E-04 | 3.27        | up   | DOCK10      |
| 8169541a      | 9.36E-04 | 1.96        | up   | DOCK11      |
| 8056222a      | 1.28E-02 | 2.49        | up   | DPP4        |
| 8165438a      | 4.67E-06 | 2.15        | down | DPP7        |
| 8138988a      | 1.07E-02 | 1.68        | down | DPY19L2P1   |
| 8141882a      | 2.82E-03 | 1.62        | down | DPY19L2P2   |
| 8027448a      | 8.77E-05 | 1.98        | down | DPY19L3     |
| 7958019a      | 8.11E-03 | 1.74        | up   | DRAM1       |
| 8023727a      | 8.01E-03 | 4.45        | up   | DSEL        |
| 8020779a      | 1.08E-02 | 1.72        | up   | DSG2        |
| 8061114a      | 2.53E-05 | 1.57        | down | DSTN        |
| 8061211a      | 4.07E-04 | 1.64        | down | DTD1        |
| 7956539a      | 6.14E-04 | 1.58        | down | DTX3        |
| 7924450a      | 6.27E-04 | 3.68        | up   | DUSP10      |
| 8116548a      | 2.19E-04 | 1.72        | up   | DUSP22      |
| 7906469a      | 3.08E-04 | 1.60        | down | DUSP23      |
| 7943442a      | 2.36E-04 | 2.01        | down | DYNC2H1     |
| 7943498a      | 7.34E-04 | 1.81        | down | DYNC2H1     |
| 8042637a      | 8.55E-04 | 2.20        | down | DYSF        |
| 7926152a      | 6.67E-03 | 1.67        | down | ECHDC3      |
| 7910694a      | 2.10E-04 | 1.69        | up   | EDARADD     |
| 7922823a      | 3.35E-03 | 1.75        | down | EDEM3       |

| Transcript ID | p-value  | Fold Change | Reg  | Gene Symbol             |
|---------------|----------|-------------|------|-------------------------|
| 8112980a      | 4.18E-03 | 4.31        | down | EDIL3                   |
| 8116921a      | 2.15E-03 | 3.79        | up   | EDN1                    |
| 7949503a      | 4.20E-03 | 1.86        | down | EFEMP2                  |
| 8120222a      | 6.36E-03 | 1.54        | up   | EFHC1                   |
| 8113433a      | 3.55E-04 | 8.29        | down | EFNA5                   |
| 8092523a      | 1.80E-03 | 1.79        | up   | EHHADH                  |
| 8179884a      | 3.41E-05 | 1.51        | up   | EHMT2                   |
| 8123920a      | 3.37E-04 | 1.89        | up   | ELOVL2                  |
| 8112274a      | 3.28E-03 | 3.49        | up   | ELOVL7                  |
| 7976698a      | 1.35E-03 | 1.74        | up   | EML1                    |
| 7954090a      | 1.36E-03 | 2.07        | down | EMP1                    |
| 7943293a      | 2.62E-02 | 1.56        | down | ENDOD1                  |
| 8122099a      | 6.65E-03 | 2.25        | up   | ENPP1                   |
| 8120061a      | 3.65E-02 | 1.64        | down | ENPP4                   |
| 8061428a      | 2.58E-03 | 1.79        | down | ENTPD6                  |
| 8041781a      | 7.86E-04 | 1.98        | up   | EPAS1                   |
| 8098439a      | 4.61E-02 | 2.16        | down | EPCAM                   |
| 8132369a      | 6.35E-04 | 2.42        | up   | EPDR1                   |
| 8059279a      | 2.43E-02 | 2.47        | up   | EPHA4                   |
| 8086141a      | 2.79E-03 | 1.58        | down | EPM2AIP1                |
| 8065032a      | 2.36E-04 | 2.25        | down | ESF1                    |
| 7953981a      | 2.50E-03 | 1.60        | up   | ETV6;ACSL6              |
| 8014063a      | 6.42E-04 | 2.86        | up   | EVI2B                   |
| 8123524a      | 2.72E-04 | 1.58        | up   | EXOC2                   |
| 7968658a      | 4.88E-04 | 1.72        | down | EXOSC8;FAM48A           |
| 7951545a      | 4.99E-02 | 1.81        | down | EXPH5                   |
| 8151310a      | 6.26E-03 | 3.36        | down | EYA1                    |
| 8063187a      | 2.39E-02 | 1.85        | down | EYA2                    |
| 8112731a      | 3.33E-03 | 3.65        | down | F2RL2                   |
| 7917875a      | 5.57E-04 | 1.91        | down | F3                      |
| 7914342a      | 2.99E-03 | 1.83        | down | FABP3                   |
| 8054045a      | 4.28E-04 | 1.55        | up   | FAHD2B;FAHD2A;LOC729234 |
| 7904948a      | 6.53E-03 | 1.69        | up   | FAM108A1                |
| 8047565a      | 4.48E-03 | 1.52        | up   | FAM117B                 |
| 8173041a      | 1.51E-02 | 1.56        | up   | FAM120C                 |
| 8169995a      | 1.57E-03 | 1.83        | up   | FAM122C                 |
| 8048468a      | 9.09E-06 | 1.60        | up   | FAM134A                 |
| 8111136a      | 1.59E-03 | 2.29        | up   | FAM134B                 |
| 8082066a      | 6.48E-03 | 1.52        | down | FAM162A                 |
| 8046895a      | 8.65E-03 | 2.53        | up   | FAM171B                 |
| 8101489a      | 1.40E-02 | 1.55        | down | FAM175A                 |
| 8022283a      | 1.18E-05 | 11.85       | up   | FAM38B                  |
| 8022295a      | 1.23E-05 | 13.12       | up   | FAM38B2                 |
| 8166442a      | 2.80E-03 | 1.54        | down | FAM3C                   |
| 8084891a      | 1.39E-03 | 1.54        | up   | FAM43A                  |
| 8174767a      | 1.30E-04 | 6.62        | down | FAM70A                  |

| Transcript ID | p-value  | Fold Change | Reg  | Gene Symbol           |
|---------------|----------|-------------|------|-----------------------|
| 7983991a      | 1.46E-04 | 2.07        | up   | FAM81A                |
| 8003503a      | 1.94E-04 | 1.81        | up   | FANCA;ZNF276          |
| 8116724a      | 7.65E-05 | 1.54        | up   | FARS2                 |
| 8064581a      | 1.59E-04 | 1.94        | down | FASTKD5;UBOX5         |
| 8077970a      | 2.35E-02 | 1.70        | down | FBLN2                 |
| 7988467a      | 1.20E-04 | 1.90        | down | FBN1                  |
| 8113800a      | 6.92E-03 | 2.52        | down | FBN2                  |
| 8152703a      | 2.24E-05 | 3.22        | up   | FBXO32                |
| 8105111a      | 2.67E-03 | 1.98        | down | FBXO4                 |
| 8051427a      | 2.36E-04 | 1.53        | up   | FEZ2                  |
| 8114805a      | 3.52E-03 | 2.30        | down | FGF1                  |
| 8097256a      | 1.47E-03 | 1.55        | up   | FGF2                  |
| 8096050a      | 1.45E-02 | 3.87        | down | FGF5                  |
| 8089112a      | 4.52E-03 | 1.76        | down | FILIP1L               |
| 8064432a      | 1.61E-04 | 2.07        | down | FKBP1A                |
| 8120428a      | 6.12E-05 | 1.73        | down | FKBP1A;FKBP1C         |
| 7920165a      | 1.29E-03 | 1.51        | down | FLG                   |
| 7945132a      | 1.39E-02 | 1.69        | up   | FLI1;EWSR1            |
| 7933638a      | 1.45E-03 | 1.84        | down | FLJ31958              |
| 7943349a      | 2.42E-02 | 1.51        | down | FLJ32810              |
| 8005043a      | 3.94E-03 | 1.86        | up   | FLJ34690              |
| 8019954a      | 6.57E-03 | 1.84        | up   | FLJ35776              |
| 8144228a      | 1.60E-04 | 2.08        | up   | FLJ36840              |
| 8074168a      | 1.19E-02 | 2.09        | up   | FLJ39632              |
| 7973002a      | 7.61E-03 | 2.68        | up   | FLJ39632;LOC100287820 |
| 8135990a      | 7.91E-03 | 1.81        | down | FLNC                  |
| 8179688a      | 1.20E-04 | 1.76        | up   | FLOT1                 |
| 7970763a      | 2.63E-03 | 2.00        | up   | FLT1                  |
| 8170326a      | 2.92E-05 | 1.61        | down | FMR1                  |
| 8116582a      | 4.05E-04 | 2.01        | up   | FOXF2                 |
| 8030866a      | 3.02E-02 | 1.84        | up   | FPR3                  |
| 8161964a      | 9.75E-03 | 2.54        | up   | FRMD3                 |
| 7932132a      | 2.33E-03 | 1.58        | down | FRMD4A                |
| 7988260a      | 3.47E-02 | 1.74        | down | FRMD5                 |
| 7968417a      | 4.45E-02 | 1.64        | down | FRY                   |
| 8023995a      | 9.42E-03 | 1.57        | down | FSTL3                 |
| 8171001a      | 4.70E-04 | 1.61        | down | FUNDC2                |
| 8145611a      | 2.75E-02 | 2.25        | down | FZD3                  |
| 8147766a      | 1.01E-03 | 2.03        | up   | FZD6                  |
| 7953943a      | 5.04E-03 | 2.23        | up   | GABARAPL1             |
| 8046283a      | 4.59E-03 | 1.55        | up   | GAD1                  |
| 7942064a      | 2.17E-03 | 1.67        | down | GAL                   |
| 7980580a      | 5.35E-03 | 2.59        | down | GALC                  |
| 8003410a      | 1.35E-04 | 2.06        | up   | GALNS                 |
| 7997414a      | 4.05E-04 | 1.52        | up   | GAN                   |
| 7970329a      | 1.92E-04 | 2.13        | down | GAS6                  |

| Transcript ID | p-value  | Fold Change | Reg  | Gene Symbol          |
|---------------|----------|-------------|------|----------------------|
| 7998103a      | 5.55E-04 | 1.69        | up   | GAS8;LOC100130015    |
| 7917561a      | 1.62E-02 | 1.75        | up   | GBP4                 |
| 8116835a      | 4.87E-03 | 1.74        | up   | GCNT2                |
| 8112668a      | 4.44E-04 | 2.22        | up   | GCNT4                |
| 7922104a      | 3.32E-04 | 1.69        | up   | GCSH                 |
| 8111670a      | 3.53E-03 | 1.88        | down | GDNF                 |
| 8116418a      | 2.57E-02 | 1.62        | up   | GFPT2                |
| 8061471a      | 1.20E-04 | 1.86        | down | GINS1                |
| 8003204a      | 2.85E-04 | 1.87        | up   | GINS2                |
| 8121749a      | 1.57E-02 | 2.29        | up   | GJA1;IFT140          |
| 8131496a      | 6.37E-04 | 1.56        | down | GLCCI1               |
| 7957260a      | 3.71E-03 | 1.56        | down | GLIPR1;KRR1          |
| 8155192a      | 4.22E-03 | 1.64        | down | GLIPR2               |
| 8159900a      | 6.26E-03 | 1.81        | down | GLIS3                |
| 8004922a      | 1.51E-03 | 1.57        | up   | GLP2R                |
| 8098006a      | 7.68E-03 | 1.54        | down | GLRB                 |
| 8154951a      | 1.81E-02 | 2.04        | up   | GLUL                 |
| 7922689a      | 8.65E-03 | 1.84        | up   | GLUL                 |
| 7940135a      | 2.57E-04 | 1.58        | down | GLYATL1              |
| 7948354a      | 2.43E-03 | 1.75        | down | GLYATL2              |
| 8117034a      | 5.35E-03 | 2.04        | up   | GMPR                 |
| 8024572a      | 1.48E-03 | 1.70        | up   | GNA15                |
| 8020164a      | 1.86E-03 | 2.19        | up   | GNAL                 |
| 8071671a      | 2.88E-03 | 1.57        | up   | GNAZ                 |
| 8134257a      | 1.03E-04 | 4.89        | up   | GNG11                |
| 7987248a      | 5.37E-03 | 1.53        | down | GOLGA8B;GOLGA8A      |
| 8175217a      | 9.21E-03 | 2.75        | up   | GPC4                 |
| 8131069a      | 2.56E-03 | 1.70        | up   | GPER                 |
| 7975167a      | 3.76E-04 | 2.71        | down | GPHN                 |
| 8131844a      | 3.10E-04 | 6.72        | up   | GPNUMB               |
| 8045336a      | 1.01E-02 | 1.53        | up   | GPR39;LYPD1          |
| 8037614a      | 1.40E-03 | 1.80        | down | GPR4                 |
| 7996081a      | 3.30E-03 | 2.50        | up   | GPR56                |
| 7904930a      | 2.28E-02 | 1.51        | down | GPR89B;GPR89A;GPR89C |
| 7999909a      | 6.37E-05 | 3.29        | up   | GPRC5B               |
| 7901460a      | 1.40E-03 | 2.56        | down | GPX7                 |
| 8081758a      | 3.17E-03 | 1.89        | up   | GRAMD1C              |
| 7982377a      | 3.45E-02 | 2.83        | down | GREM1                |
| 8167654a      | 2.82E-02 | 1.83        | down | GSPT2                |
| 8171079a      | 9.09E-06 | 1.88        | up   | GTPBP6               |
| 8046906a      | 6.06E-04 | 11.27       | up   | GULP1                |
| 8061373a      | 5.42E-04 | 1.74        | down | GZF1                 |
| 8072926a      | 2.13E-03 | 1.89        | down | H1F0                 |
| 8124691a      | 2.97E-03 | 1.56        | up   | HCG8                 |
| 8096361a      | 1.06E-03 | 2.84        | up   | HERC5                |
| 8096335a      | 3.06E-03 | 1.94        | up   | HERC6                |

| Transcript ID | p-value  | Fold Change | Reg  | Gene Symbol   |
|---------------|----------|-------------|------|---------------|
| 8084880a      | 3.93E-03 | 2.21        | up   | HES1          |
| 8121886a      | 1.39E-03 | 1.68        | up   | HINT3         |
| 8124518a      | 3.57E-02 | 1.57        | up   | HIST1H2AJ     |
| 8117594a      | 7.19E-03 | 2.08        | up   | HIST1H2BM     |
| 8124440a      | 7.33E-03 | 1.59        | up   | HIST1H3G      |
| 8117422a      | 4.46E-04 | 4.79        | down | HIST1H4F      |
| 8116910a      | 1.49E-03 | 1.73        | up   | HIVEP1        |
| 8042942a      | 1.43E-03 | 1.83        | down | HK2           |
| 8117760a      | 1.68E-03 | 2.05        | up   | HLA-F         |
| 8111941a      | 2.40E-03 | 3.11        | up   | HMGCS1        |
| 8112841a      | 3.65E-02 | 2.51        | up   | HOMER1        |
| 8138708a      | 8.46E-04 | 2.37        | up   | HOXA1         |
| 8138718a      | 1.88E-03 | 2.16        | up   | HOXA2         |
| 8138721a      | 3.90E-04 | 1.57        | up   | HOXA3         |
| 7955858a      | 3.60E-02 | 1.64        | up   | HOXC10        |
| 7955845a      | 2.86E-02 | 2.10        | up   | HOXC13        |
| 7955865a      | 3.54E-03 | 1.83        | up   | HOXC9         |
| 8040238a      | 1.23E-03 | 1.67        | up   | HPCAL1        |
| 7946988a      | 6.03E-03 | 1.60        | up   | HPS5          |
| 7898677a      | 6.62E-03 | 1.69        | up   | HS6ST1        |
| 8055130a      | 7.66E-04 | 1.55        | up   | HS6ST1        |
| 7956271a      | 1.92E-03 | 1.50        | up   | HSD17B6       |
| 8003116a      | 1.35E-05 | 2.09        | up   | HSDL1         |
| 7936516a      | 3.40E-04 | 1.81        | up   | HSPA12A       |
| 7959102a      | 2.58E-03 | 2.81        | up   | HSPB8         |
| 7913450a      | 2.68E-04 | 1.80        | down | HSPG2;LDLRAD2 |
| 7913566a      | 1.41E-03 | 2.27        | up   | HTR1D         |
| 7934970a      | 6.13E-03 | 1.58        | down | HTR7          |
| 7913655a      | 3.27E-02 | 1.53        | up   | ID3           |
| 8117120a      | 3.50E-04 | 1.72        | up   | ID4           |
| 8064522a      | 1.53E-04 | 1.74        | down | IDH3B         |
| 8175593a      | 6.10E-03 | 1.53        | down | IDS           |
| 8179704a      | 1.61E-04 | 1.60        | up   | IER3          |
| 8026971a      | 4.39E-02 | 1.59        | up   | IFI30         |
| 7902553a      | 1.69E-02 | 1.57        | up   | IFI44         |
| 8056285a      | 4.10E-03 | 2.13        | up   | IFIH1         |
| 7929065a      | 1.02E-02 | 1.54        | up   | IFIT1         |
| 7937335a      | 1.62E-04 | 3.61        | up   | IFITM1        |
| 8160435a      | 5.98E-03 | 2.05        | down | IFNE          |
| 7967933a      | 4.28E-03 | 1.55        | down | IFT88         |
| 8008151a      | 2.17E-03 | 1.88        | down | IGF2BP1       |
| 8007100a      | 1.61E-02 | 1.94        | down | IGFBP4        |
| 8039484a      | 1.37E-02 | 1.66        | down | IL11          |
| 8169580a      | 7.26E-03 | 1.73        | up   | IL13RA1       |
| 7951686a      | 2.86E-02 | 2.49        | down | IL18          |
| 8043995a      | 3.91E-02 | 1.52        | up   | IL1R1         |

| Transcript ID | p-value  | Fold Change | Reg  | Gene Symbol                               |
|---------------|----------|-------------|------|-------------------------------------------|
| 7909271a      | 1.89E-03 | 1.70        | down | IL24                                      |
| 7992828a      | 4.97E-02 | 1.54        | down | IL32                                      |
| 8131803a      | 1.37E-04 | 3.29        | up   | IL6                                       |
| 8104901a      | 3.50E-02 | 1.93        | up   | IL7R                                      |
| 7922018a      | 6.78E-04 | 2.63        | down | ILDR2                                     |
| 8020183a      | 2.77E-04 | 1.69        | up   | IMPA2                                     |
| 8017283a      | 5.42E-05 | 1.50        | up   | INTS2                                     |
| 7993713a      | 7.80E-04 | 1.71        | up   | IQCK                                      |
| 8106354a      | 3.52E-02 | 1.75        | up   | IQGAP2                                    |
| 7997712a      | 2.13E-03 | 1.89        | up   | IRF8                                      |
| 8110865a      | 2.55E-05 | 2.14        | up   | IRX4                                      |
| 8035465a      | 8.56E-03 | 2.49        | down | ISYNA1                                    |
| 7963880a      | 2.96E-03 | 2.36        | down | ITGA7                                     |
| 8009951a      | 2.38E-02 | 1.82        | up   | ITGB4                                     |
| 8060611a      | 1.99E-04 | 2.02        | down | ITPA                                      |
| 8118734a      | 5.31E-04 | 1.81        | up   | ITPR3                                     |
| 7922889a      | 1.04E-04 | 1.79        | down | IVNS1ABP                                  |
| 7998267a      | 7.15E-03 | 1.90        | down | JMJD8                                     |
| 7943314a      | 1.88E-04 | 1.75        | down | JRKL                                      |
| 8015412a      | 1.66E-02 | 1.52        | down | JUP                                       |
| 8067029a      | 3.22E-04 | 1.94        | up   | KCNG1                                     |
| 8067033a      | 1.97E-04 | 1.94        | up   | KCNG1                                     |
| 8051785a      | 8.72E-06 | 2.23        | up   | KCNG3                                     |
| 8000738a      | 6.12E-05 | 1.58        | up   | KCTD13                                    |
| 7971369a      | 7.97E-04 | 1.85        | down | KCTD4                                     |
| 7972682a      | 7.97E-04 | 1.58        | down | KDEL1                                     |
| 8159854a      | 1.07E-02 | 1.53        | down | KIAA0020                                  |
| 7997680a      | 1.94E-03 | 1.54        | up   | KIAA0182                                  |
| 8099721a      | 1.23E-03 | 2.22        | down | KIAA0746                                  |
| 7926679a      | 5.42E-04 | 2.30        | down | KIAA1217                                  |
| 8010426a      | 2.55E-03 | 1.63        | up   | KIAA1618                                  |
| 8076668a      | 1.12E-03 | 2.26        | up   | KIAA1644                                  |
| 7990941a      | 8.96E-04 | 1.78        | down | KIAA1920;LOC100291610;LOC390627;LOC440297 |
| 8065089a      | 6.63E-03 | 1.90        | down | KIF16B                                    |
| 7929078a      | 2.17E-04 | 1.60        | down | KIF20B                                    |
| 8045637a      | 3.24E-04 | 3.68        | up   | KIF5C                                     |
| 7922268a      | 5.55E-04 | 1.60        | down | KIFAP3                                    |
| 7952577a      | 5.13E-04 | 2.04        | down | KIRREL3                                   |
| 8095110a      | 2.67E-03 | 3.67        | down | KIT                                       |
| 7965322a      | 1.15E-02 | 1.73        | down | KITLG                                     |
| 8040211a      | 7.99E-03 | 1.56        | up   | KLF11                                     |
| 7997626a      | 6.39E-05 | 1.72        | up   | KLHL36                                    |
| 8072170a      | 5.91E-05 | 2.22        | up   | KREMEN1                                   |
| 8015387a      | 2.50E-04 | 7.06        | down | KRT17                                     |
| 8005449a      | 1.43E-04 | 4.91        | down | KRT17                                     |
| 8013042a      | 3.03E-04 | 3.70        | down | KRT17                                     |

| Transcript ID | p-value  | Fold Change | Reg  | Gene Symbol               |
|---------------|----------|-------------|------|---------------------------|
| 8045539a      | 1.68E-02 | 1.64        | up   | KYNU                      |
| 8128991a      | 1.54E-02 | 2.61        | up   | LAMA4                     |
| 7924029a      | 7.48E-03 | 1.97        | down | LAMB3                     |
| 7908041a      | 2.39E-03 | 1.57        | down | LAMC1                     |
| 7908072a      | 4.49E-04 | 2.43        | down | LAMC2                     |
| 8092348a      | 7.22E-03 | 2.25        | up   | LAMP3                     |
| 8046086a      | 1.70E-02 | 1.72        | up   | LASS6                     |
| 7924603a      | 9.73E-04 | 1.64        | down | LBR                       |
| 8099581a      | 1.13E-02 | 1.52        | down | LCORL;NCAPG               |
| 8157751a      | 2.68E-04 | 2.18        | up   | LHX2                      |
| 8075310a      | 1.54E-02 | 1.57        | down | LIF;MGC20647              |
| 8111677a      | 2.11E-03 | 1.64        | up   | LIFR                      |
| 8092541a      | 4.37E-03 | 3.61        | up   | LIPH                      |
| 8009844a      | 3.13E-03 | 1.51        | up   | LLGL2                     |
| 8144089a      | 3.99E-04 | 1.59        | down | LMBR1                     |
| 8157922a      | 6.37E-05 | 1.53        | up   | LMX1B                     |
| 8135585a      | 2.85E-03 | 2.18        | down | LOC100128868              |
| 7912884a      | 5.58E-03 | 1.57        | down | LOC100132147;LOC100133616 |
| 8155503a      | 3.14E-03 | 2.09        | down | LOC100132167;LOC100292301 |
| 8161368a      | 9.91E-04 | 1.56        | down | LOC100132167;LOC100292301 |
| 8031825a      | 4.54E-04 | 1.59        | down | LOC100288322;ZNF587       |
| 8154727a      | 1.52E-04 | 1.87        | up   | LOC138412                 |
| 7998405a      | 7.96E-03 | 1.50        | up   | LOC146336                 |
| 7919139a      | 5.98E-03 | 1.99        | up   | LOC375010                 |
| 8056968a      | 5.55E-04 | 1.77        | up   | LOC375295                 |
| 8160431a      | 3.47E-02 | 1.99        | down | LOC554202                 |
| 8112306a      | 1.43E-03 | 1.53        | down | LOC57399                  |
| 8111922a      | 1.44E-03 | 1.67        | up   | LOC648987                 |
| 8113709a      | 3.03E-04 | 4.25        | down | LOX                       |
| 7917276a      | 1.48E-03 | 2.76        | up   | LPAR3                     |
| 8110841a      | 2.22E-03 | 1.97        | up   | LPCAT1                    |
| 7964602a      | 1.09E-02 | 1.58        | up   | LRIG3                     |
| 8152280a      | 1.51E-02 | 1.61        | down | LRP12                     |
| 8117243a      | 1.18E-04 | 3.05        | up   | LRRC16A                   |
| 7986463a      | 2.69E-04 | 2.36        | up   | LRRK1                     |
| 7968126a      | 3.86E-03 | 1.53        | down | LSP1                      |
| 7905028a      | 8.71E-03 | 1.52        | down | LSP1;LOC645166;LOC654342  |
| 7980152a      | 1.04E-02 | 1.72        | down | LTBP2                     |
| 8178059a      | 3.03E-04 | 1.78        | up   | LY6G5B;CSNK2B             |
| 8118228a      | 2.13E-02 | 1.51        | up   | LY6G5B;CSNK2B             |
| 8146500a      | 1.18E-02 | 1.52        | up   | LYN                       |
| 8055314a      | 1.91E-03 | 2.30        | up   | LYPD1;GPR39               |
| 8045674a      | 4.35E-04 | 5.12        | up   | LYPD6                     |
| 8045664a      | 5.13E-04 | 7.09        | up   | LYPD6B                    |
| 8088602a      | 1.77E-04 | 1.60        | down | MAGI1                     |
| 7904106a      | 1.32E-02 | 1.69        | down | MAGI3                     |



| Transcript ID | p-value  | Fold Change | Reg  | Gene Symbol |
|---------------|----------|-------------|------|-------------|
| 8170420a      | 2.81E-03 | 2.05        | down | MAMLD1      |
| 8107234a      | 4.05E-04 | 1.60        | down | MAN2A1      |
| 8105436a      | 1.12E-04 | 1.65        | down | MAP3K1      |
| 8129804a      | 5.09E-04 | 3.90        | up   | MAP3K5      |
| 8119016a      | 8.11E-03 | 1.84        | down | MAPK13      |
| 8025421a      | 6.72E-04 | 1.56        | up   | MAR2        |
| 8177498a      | 3.52E-02 | 1.60        | up   | MARVELD2    |
| 8050537a      | 4.81E-03 | 1.51        | up   | MATN3       |
| 8124166a      | 1.80E-03 | 2.64        | up   | MBOAT1      |
| 8113551a      | 4.45E-03 | 1.66        | down | MCC         |
| 8092358a      | 4.23E-02 | 1.52        | up   | MCF2L2      |
| 8060813a      | 7.06E-04 | 1.75        | down | MCM8        |
| 8129214a      | 1.08E-04 | 1.86        | up   | MCM9        |
| 8129218a      | 2.14E-04 | 1.60        | up   | MCM9        |
| 7917283a      | 3.75E-04 | 2.04        | up   | MCOLN2      |
| 7917304a      | 7.50E-04 | 2.69        | up   | MCOLN3      |
| 7986293a      | 8.91E-03 | 2.81        | up   | MCTP2       |
| 8135568a      | 2.50E-03 | 1.54        | down | MDFIC       |
| 7939665a      | 2.13E-02 | 1.66        | down | MDK         |
| 8110886a      | 1.56E-03 | 1.70        | up   | MED10;DNAL4 |
| 7971550a      | 1.14E-02 | 1.52        | down | MED4        |
| 7987385a      | 9.16E-03 | 1.59        | up   | MEIS2       |
| 8093171a      | 1.05E-02 | 1.58        | down | MF12        |
| 8074695a      | 7.97E-04 | 1.73        | up   | MGC16703    |
| 8123606a      | 1.66E-02 | 1.75        | up   | MGC39372    |
| 7954196a      | 2.51E-02 | 1.57        | up   | MGST1       |
| 8171297a      | 2.70E-03 | 1.61        | down | MID1        |
| 8018343a      | 2.84E-03 | 1.57        | up   | MIF4GD      |
| 8068022a      | 6.81E-03 | 1.90        | down | MIR155HG    |
| 8008885a      | 1.62E-03 | 1.96        | up   | MIR21       |
| 8064967a      | 1.64E-04 | 1.94        | down | MKKS        |
| 7932733a      | 1.54E-02 | 2.60        | up   | MKX         |
| 8083616a      | 3.63E-03 | 2.01        | down | MLF1        |
| 7905329a      | 2.25E-02 | 2.01        | down | MLLT11      |
| 8160332a      | 4.37E-05 | 5.02        | down | MLLT3       |
| 8151684a      | 1.79E-03 | 3.10        | down | MMP16       |
| 8151686a      | 2.09E-02 | 2.12        | down | MMP16       |
| 8062123a      | 3.41E-05 | 2.67        | down | MMP24       |
| 7989146a      | 1.69E-02 | 1.61        | up   | MNS1        |
| 7909866a      | 9.04E-03 | 1.55        | up   | MOSC2       |
| 8129573a      | 3.19E-02 | 1.94        | up   | MOXD1       |
| 8003068a      | 9.54E-05 | 1.65        | up   | MPHOSPH6    |
| 7993453a      | 2.15E-03 | 1.56        | down | MPV17L      |
| 8026182a      | 6.06E-04 | 1.54        | up   | MRI1        |
| 8095894a      | 9.04E-03 | 1.71        | down | MRPL1       |
| 8179139a      | 6.37E-05 | 1.57        | up   | MRPS18B     |

| Transcript ID | p-value  | Fold Change | Reg  | Gene Symbol    |
|---------------|----------|-------------|------|----------------|
| 8151334a      | 4.32E-03 | 2.01        | up   | MSC            |
| 7992071a      | 3.93E-05 | 2.73        | down | MSLN           |
| 8145766a      | 3.66E-03 | 2.18        | down | MST131         |
| 7995825a      | 7.49E-03 | 1.72        | up   | MT1F           |
| 8170443a      | 1.18E-04 | 1.70        | down | MTMR1          |
| 8149500a      | 8.23E-03 | 2.13        | up   | MTUS1          |
| 7920642a      | 5.86E-03 | 1.86        | down | MUC1           |
| 8003332a      | 4.70E-04 | 1.61        | up   | MVD            |
| 8031047a      | 7.20E-05 | 1.55        | down | MYADM          |
| 8117020a      | 3.01E-03 | 2.09        | up   | MYLIP          |
| 8111153a      | 3.91E-03 | 1.79        | up   | MYO10          |
| 7988876a      | 5.22E-04 | 2.74        | down | MYO5C          |
| 8005048a      | 5.70E-04 | 2.01        | up   | MYOCD          |
| 7927827a      | 2.63E-03 | 3.80        | up   | MYPN           |
| 8065510a      | 6.07E-03 | 1.62        | down | NANP           |
| 8065372a      | 1.63E-04 | 2.13        | down | NAPB           |
| 8061262a      | 1.60E-04 | 2.12        | down | NAT5           |
| 7957298a      | 1.97E-02 | 2.12        | up   | NAV3           |
| 7922773a      | 2.33E-03 | 1.91        | down | NCF2           |
| 8121861a      | 2.16E-03 | 1.67        | up   | NCOA7          |
| 8178324a      | 6.05E-04 | 1.52        | up   | NCRNA00171     |
| 7977621a      | 2.77E-03 | 2.02        | up   | NDRG2          |
| 8123936a      | 7.47E-03 | 2.09        | up   | NEDD9          |
| 7916986a      | 6.15E-04 | 3.82        | down | NEGR1          |
| 8179851a      | 1.35E-04 | 1.53        | up   | NEU1           |
| 7902495a      | 2.06E-04 | 1.71        | down | NEXN           |
| 7909027a      | 2.60E-04 | 2.20        | down | NFASC          |
| 8160138a      | 4.30E-03 | 1.54        | down | NFIB           |
| 7978644a      | 4.37E-03 | 1.54        | up   | NFKBIA         |
| 8162455a      | 1.17E-03 | 1.52        | up   | NINJ1          |
| 8065485a      | 1.72E-04 | 1.55        | down | NINL           |
| 7946334a      | 4.81E-03 | 1.86        | down | NLRP10         |
| 8039545a      | 1.40E-03 | 1.61        | up   | NLRP11         |
| 7932227a      | 9.87E-04 | 1.86        | down | NMT2           |
| 8100464a      | 5.21E-03 | 2.34        | down | NMU            |
| 7935146a      | 2.65E-04 | 1.59        | down | NOC3L          |
| 8060484a      | 6.05E-04 | 1.77        | down | NOP56;SNORD56  |
| 7978391a      | 3.94E-02 | 1.53        | down | NOVA1          |
| 8043909a      | 8.11E-03 | 1.59        | up   | NPAS2          |
| 7912520a      | 1.24E-02 | 5.14        | down | NPPB           |
| 8155121a      | 2.99E-05 | 1.87        | up   | NPR2           |
| 8002303a      | 6.41E-05 | 2.11        | up   | NQO1           |
| 8116610a      | 4.25E-04 | 1.76        | up   | NQO2;LOC401233 |
| 8145736a      | 1.57E-02 | 1.67        | down | NRG1           |
| 8060339a      | 8.85E-04 | 1.67        | down | NRSN2          |
| 8064438a      | 3.41E-05 | 1.83        | down | NSFL1C         |

| Transcript ID | p-value  | Fold Change | Reg  | Gene Symbol                            |
|---------------|----------|-------------|------|----------------------------------------|
| 7981566a      | 6.15E-05 | 1.72        | up   | NUDT14                                 |
| 7997332a      | 3.53E-02 | 1.98        | up   | NUDT7                                  |
| 8085431a      | 3.48E-02 | 1.61        | down | NUP210                                 |
| 7958895a      | 8.98E-04 | 1.57        | up   | OAS3                                   |
| 7967117a      | 2.68E-03 | 1.51        | up   | OASL                                   |
| 8098441a      | 3.08E-04 | 2.21        | down | ODZ3                                   |
| 7921882a      | 2.77E-02 | 1.54        | up   | OLFML2B                                |
| 8143629a      | 1.27E-02 | 1.58        | down | OR2A9P;OR2A20P;OR2A5                   |
| 7945831a      | 3.72E-04 | 1.52        | up   | OSBPL5                                 |
| 8098263a      | 1.35E-03 | 1.66        | down | PALLD                                  |
| 8107133a      | 7.98E-05 | 1.66        | down | PAM                                    |
| 7947512a      | 2.06E-04 | 3.84        | down | PAMR1                                  |
| 7984524a      | 4.72E-02 | 1.65        | down | PAQR5                                  |
| 7906954a      | 7.79E-04 | 2.76        | up   | PBX1                                   |
| 8108733a      | 9.45E-03 | 1.56        | up   | PCDHB12                                |
| 7929132a      | 8.27E-03 | 1.87        | down | PCGF5                                  |
| 8064844a      | 2.10E-04 | 1.64        | down | PCNA                                   |
| 8019778a      | 3.03E-04 | 1.53        | up   | PCYT2                                  |
| 8130674a      | 8.77E-05 | 6.55        | up   | PDE10A                                 |
| 7904965a      | 3.50E-03 | 2.07        | down | PDE4DIP                                |
| 8068833a      | 4.78E-04 | 1.97        | up   | PDE9A;LOC100132338                     |
| 8137670a      | 4.12E-03 | 2.11        | up   | PDGFA;LOC100132080                     |
| 8104022a      | 8.25E-04 | 3.03        | up   | PDLIM3                                 |
| 7898057a      | 2.76E-02 | 1.73        | down | PDPN                                   |
| 8000501a      | 3.21E-02 | 1.80        | down | PDXDC2;NPIP;NPIPL2;LOC728741;LOC730153 |
| 8104693a      | 4.24E-03 | 1.62        | down | PDZD2                                  |
| 7904843a      | 2.66E-04 | 3.04        | down | PDZK1;PDZK1P1                          |
| 8052654a      | 4.81E-03 | 1.55        | down | PEL1                                   |
| 8105229a      | 7.08E-03 | 1.58        | down | PELO;ITGA1                             |
| 8129880a      | 1.12E-04 | 5.04        | up   | PERP                                   |
| 8134098a      | 2.78E-02 | 1.51        | down | PFTK1                                  |
| 8147469a      | 2.74E-03 | 2.89        | up   | PGCP                                   |
| 7980233a      | 4.80E-03 | 1.88        | up   | PGF                                    |
| 7901951a      | 3.92E-05 | 1.62        | down | PGM1                                   |
| 8118682a      | 1.25E-04 | 1.58        | up   | PHF1                                   |
| 8173551a      | 9.05E-03 | 1.81        | up   | PHKA1                                  |
| 7921526a      | 4.63E-03 | 1.57        | down | PIGM                                   |
| 8119161a      | 4.37E-05 | 1.85        | up   | PIM1                                   |
| 8171435a      | 2.35E-02 | 1.97        | up   | PIR                                    |
| 7948987a      | 7.54E-03 | 1.72        | up   | PLA2G16                                |
| 8129985a      | 3.58E-03 | 1.90        | down | PLAGL1                                 |
| 8037374a      | 5.35E-03 | 1.69        | down | PLAUR                                  |
| 7929388a      | 2.46E-02 | 1.51        | down | PLCE1                                  |
| 7997453a      | 5.24E-06 | 2.12        | up   | PLCG2                                  |
| 8176286a      | 9.70E-04 | 1.83        | up   | PLCXD1                                 |
| 7931081a      | 1.12E-04 | 1.51        | down | PLEKHA1                                |

| Transcript ID | p-value  | Fold Change | Reg  | Gene Symbol                  |
|---------------|----------|-------------|------|------------------------------|
| 7946781a      | 6.12E-05 | 2.28        | down | PLEKHA7                      |
| 8041644a      | 1.89E-02 | 1.57        | up   | PLEKHH2                      |
| 8112202a      | 4.28E-04 | 1.62        | down | PLK2                         |
| 8091327a      | 7.03E-03 | 1.59        | up   | PLSCR1                       |
| 8091306a      | 1.46E-03 | 2.87        | up   | PLSCR4                       |
| 7923991a      | 5.42E-05 | 1.85        | down | PLXNA2                       |
| 8170921a      | 6.33E-04 | 1.53        | down | PLXNA3                       |
| 8048257a      | 1.46E-04 | 1.52        | up   | PNKD                         |
| 8171229a      | 8.00E-03 | 2.02        | down | PNPLA4                       |
| 8141791a      | 1.98E-03 | 1.62        | up   | POLR2J3;POLR2J2;UPLP;POLR2J4 |
| 8061171a      | 1.77E-04 | 1.89        | down | POLR3F;C20orf12              |
| 8106820a      | 4.16E-02 | 1.94        | up   | POLR3G                       |
| 7971077a      | 7.84E-04 | 6.16        | up   | POSTN                        |
| 7930980a      | 3.46E-02 | 2.17        | down | PPAPDC1A                     |
| 7964646a      | 2.17E-04 | 2.43        | up   | PPM1H                        |
| 8176986a      | 5.42E-05 | 1.74        | up   | PPP2R3B                      |
| 8040278a      | 1.18E-05 | 2.49        | up   | PQLC3                        |
| 8121257a      | 2.53E-03 | 2.23        | up   | PRDM1                        |
| 7962375a      | 1.35E-05 | 5.66        | down | PRICKLE1                     |
| 7919305a      | 9.77E-04 | 1.55        | down | PRKAB2                       |
| 8135378a      | 1.46E-02 | 2.04        | up   | PRKAR2B                      |
| 8171182a      | 3.37E-04 | 2.53        | up   | PRKX                         |
| 8060758a      | 1.29E-03 | 1.58        | down | PRNP                         |
| 8089011a      | 2.52E-02 | 1.86        | down | PROS1                        |
| 8166049a      | 8.25E-04 | 1.63        | up   | PRPS2                        |
| 8107563a      | 3.00E-02 | 1.72        | up   | PRR16                        |
| 8166705a      | 2.20E-05 | 2.87        | down | PRRG1;TSPAN7                 |
| 7939150a      | 2.07E-03 | 2.25        | up   | PRRG4                        |
| 8069582a      | 1.50E-02 | 1.94        | down | PRSS7                        |
| 7989073a      | 1.92E-03 | 1.75        | up   | PRTG                         |
| 8161865a      | 4.42E-02 | 2.29        | down | PRUNE2                       |
| 8149551a      | 7.47E-04 | 3.00        | down | PSD3                         |
| 8149555a      | 9.20E-03 | 2.12        | down | PSD3                         |
| 8037283a      | 4.00E-02 | 2.15        | up   | PSG4;PSG1                    |
| 8180049a      | 1.35E-03 | 1.62        | up   | PSMB8                        |
| 8179495a      | 3.51E-03 | 1.99        | up   | PSMB9                        |
| 8060379a      | 4.81E-04 | 1.55        | down | PSMF1                        |
| 8105067a      | 2.91E-04 | 2.12        | up   | PTGER4                       |
| 8160346a      | 8.40E-05 | 11.04       | down | PTPLAD2                      |
| 8045182a      | 4.64E-04 | 1.52        | up   | PTPN18                       |
| 7953569a      | 5.21E-04 | 1.71        | up   | PTPN6                        |
| 8060539a      | 2.36E-04 | 1.64        | down | PTPRA;VPS16                  |
| 7964872a      | 6.20E-04 | 2.64        | down | PTPRB                        |
| 8080810a      | 1.00E-04 | 2.91        | down | PTPRG                        |
| 8061447a      | 8.44E-04 | 1.50        | down | PYGB                         |
| 8041508a      | 8.70E-03 | 2.40        | down | QPCT                         |

| Transcript ID | p-value  | Fold Change | Reg  | Gene Symbol            |
|---------------|----------|-------------|------|------------------------|
| 8021301a      | 1.51E-02 | 1.59        | up   | RAB27B                 |
| 8034202a      | 8.14E-04 | 1.55        | up   | RAB3D                  |
| 7899499a      | 6.93E-04 | 1.93        | down | RAB42                  |
| 8001147a      | 1.77E-04 | 1.58        | up   | RAB43;ISY1             |
| 8174271a      | 4.73E-04 | 1.78        | down | RAB9B                  |
| 8160016a      | 1.32E-03 | 1.51        | down | RANBP6                 |
| 8096538a      | 8.89E-04 | 1.91        | down | RAP1GDS1               |
| 7940775a      | 5.34E-03 | 2.35        | up   | RARRES3                |
| 7987405a      | 4.38E-02 | 1.52        | up   | RASGRP1                |
| 7902023a      | 1.20E-02 | 2.27        | up   | RAVER2                 |
| 8065230a      | 1.48E-03 | 1.74        | down | RBBP9                  |
| 8060353a      | 1.77E-03 | 1.61        | down | RBCK1                  |
| 8117045a      | 1.18E-04 | 1.84        | up   | RBM24                  |
| 8078330a      | 1.46E-04 | 2.34        | down | RBMS3                  |
| 8094460a      | 6.31E-04 | 1.50        | down | RBPJ                   |
| 8155169a      | 8.77E-05 | 1.73        | down | RECK                   |
| 8166243a      | 1.28E-03 | 2.51        | up   | REPS2                  |
| 7908125a      | 2.25E-04 | 2.40        | down | RGL1                   |
| 8180144a      | 9.89E-05 | 1.80        | up   | RGL2                   |
| 8009277a      | 3.39E-04 | 2.61        | up   | RGS9                   |
| 7963009a      | 7.51E-03 | 1.77        | up   | RHEBL1                 |
| 7933821a      | 2.53E-03 | 2.18        | down | RHOBTB1                |
| 8005064a      | 1.65E-02 | 1.53        | up   | RICH2                  |
| 8111698a      | 1.36E-02 | 1.52        | up   | RICTOR                 |
| 8074593a      | 2.37E-02 | 2.16        | up   | RIMBP3;RIMBP3B;RIMBP3C |
| 8147206a      | 2.00E-03 | 1.56        | up   | RIPK2                  |
| 8070489a      | 2.42E-02 | 1.85        | up   | RIPK4                  |
| 8130768a      | 7.79E-04 | 1.53        | up   | RNASET2;LOC100131869   |
| 8018652a      | 4.07E-03 | 1.52        | up   | RNF157                 |
| 8003348a      | 1.35E-04 | 1.73        | up   | RNF166                 |
| 8010454a      | 1.97E-03 | 1.74        | up   | RNF213;LOC100294362    |
| 8064766a      | 6.12E-03 | 1.55        | down | RNF24                  |
| 7934885a      | 4.17E-06 | 3.48        | down | RNLS                   |
| 8049689a      | 1.90E-03 | 1.53        | up   | RNPEPL1                |
| 8104492a      | 1.51E-02 | 1.90        | up   | ROPN1L                 |
| 7901969a      | 3.41E-05 | 1.95        | down | ROR1                   |
| 8064868a      | 2.69E-04 | 2.82        | down | RP5-1022P6.2           |
| 7924144a      | 2.70E-03 | 1.59        | down | RPL21P28               |
| 8117881a      | 3.49E-04 | 1.53        | up   | RPP21;TRIM39;TRIM39R   |
| 7980744a      | 2.42E-03 | 1.59        | up   | RPS6KA5                |
| 8027354a      | 4.78E-02 | 1.76        | up   | RPSAP58                |
| 8065136a      | 7.12E-05 | 1.58        | down | RRBP1                  |
| 8053142a      | 1.10E-03 | 1.63        | up   | RTKN                   |
| 8125638a      | 9.89E-05 | 1.69        | up   | RXRБ                   |
| 8180111a      | 2.90E-04 | 1.54        | up   | RXRБ                   |
| 7903393a      | 9.54E-05 | 2.23        | down | S1PR1                  |

| Transcript ID | p-value  | Fold Change | Reg  | Gene Symbol        |
|---------------|----------|-------------|------|--------------------|
| 8156278a      | 8.40E-04 | 1.54        | up   | S1PR3;C9orf47      |
| 7970569a      | 1.39E-02 | 1.52        | down | SACS               |
| 8058091a      | 7.83E-06 | 6.85        | up   | SATB2              |
| 7944656a      | 2.89E-02 | 1.61        | up   | SC5DL              |
| 7929816a      | 8.71E-03 | 1.65        | up   | SCD                |
| 7935776a      | 1.80E-03 | 1.57        | up   | SCD                |
| 8059345a      | 2.10E-02 | 1.75        | up   | SCG2               |
| 8147461a      | 2.64E-03 | 5.05        | up   | SDC2               |
| 8003060a      | 7.82E-09 | 5.42        | down | SDR42E1            |
| 8061186a      | 1.59E-04 | 1.84        | down | SEC23B             |
| 8019486a      | 1.16E-02 | 1.94        | down | SECTM1             |
| 8162236a      | 9.81E-03 | 2.05        | up   | SEMA4D             |
| 8032839a      | 3.49E-04 | 1.81        | up   | SEMA6B             |
| 7983527a      | 1.20E-02 | 1.96        | up   | SEMA6D             |
| 7990345a      | 2.76E-04 | 3.12        | down | SEMA7A             |
| 7968892a      | 3.41E-05 | 2.12        | down | SERP2              |
| 8021635a      | 1.88E-02 | 3.99        | down | SERPINB2;SERPINB10 |
| 8021623a      | 1.15E-02 | 2.73        | down | SERPINB7           |
| 8123609a      | 6.32E-03 | 1.63        | up   | SERPINB9           |
| 8059376a      | 9.09E-06 | 3.72        | up   | SERPINE2           |
| 7942596a      | 8.71E-06 | 2.56        | down | SERPINH1           |
| 8057394a      | 1.38E-03 | 2.04        | up   | SESTD1             |
| 7930148a      | 2.65E-03 | 1.75        | down | SFXN2              |
| 8129677a      | 4.64E-04 | 2.58        | up   | SGK1               |
| 8096733a      | 2.23E-03 | 1.52        | down | SGMS2              |
| 7950042a      | 2.35E-02 | 1.51        | down | SHANK2             |
| 8128459a      | 5.24E-06 | 4.16        | up   | SIM1               |
| 8060418a      | 6.68E-04 | 2.55        | down | SIRPA              |
| 8138689a      | 6.34E-05 | 7.64        | up   | SKAP2              |
| 8179364a      | 2.33E-04 | 1.53        | up   | SKIV2L             |
| 7906613a      | 6.60E-03 | 1.62        | down | SLAMF7             |
| 8094960a      | 9.70E-04 | 1.81        | down | SLC10A4            |
| 8110755a      | 4.39E-03 | 2.39        | up   | SLC12A7            |
| 7934936a      | 4.59E-03 | 1.64        | down | SLC16A12           |
| 8004266a      | 1.73E-03 | 1.60        | up   | SLC16A13           |
| 7922162a      | 4.76E-03 | 1.57        | down | SLC19A2            |
| 8123658a      | 3.64E-04 | 1.53        | up   | SLC22A23           |
| 8064808a      | 1.38E-03 | 1.82        | down | SLC23A2            |
| 7966600a      | 7.82E-06 | 1.79        | up   | SLC24A6            |
| 7971388a      | 2.45E-03 | 1.62        | down | SLC25A30           |
| 8177003a      | 6.34E-05 | 1.82        | up   | SLC25A6;LOC138412  |
| 8131326a      | 1.73E-04 | 1.91        | up   | SLC29A4            |
| 8068810a      | 4.22E-03 | 1.77        | up   | SLC37A1            |
| 8143367a      | 3.20E-04 | 1.88        | down | SLC37A3            |
| 8079931a      | 3.17E-02 | 1.57        | down | SLC38A3            |
| 8172425a      | 1.96E-04 | 8.04        | down | SLC38A5            |

| Transcript ID | p-value  | Fold Change | Reg  | Gene Symbol         |
|---------------|----------|-------------|------|---------------------|
| 8057677a      | 1.72E-03 | 2.36        | up   | SLC40A1             |
| 7948229a      | 1.13E-03 | 1.72        | down | SLC43A3             |
| 7970793a      | 4.92E-03 | 2.07        | up   | SLC46A3             |
| 8005603a      | 3.30E-04 | 3.16        | up   | SLC47A1             |
| 8064613a      | 3.44E-04 | 2.25        | down | SLC4A11             |
| 8095585a      | 7.85E-07 | 6.48        | down | SLC4A4              |
| 8078014a      | 2.21E-03 | 1.66        | up   | SLC6A6              |
| 8102800a      | 2.28E-03 | 2.14        | up   | SLC7A11             |
| 8063923a      | 1.74E-02 | 1.54        | up   | SLCO4A1;hCG_2018279 |
| 8094301a      | 8.14E-05 | 4.44        | up   | SLIT2               |
| 8154059a      | 1.87E-03 | 1.54        | down | SMARCA2             |
| 7925589a      | 2.44E-04 | 2.00        | down | SMYD3               |
| 8101762a      | 2.35E-04 | 3.09        | up   | SNCA                |
| 8107326a      | 4.32E-03 | 1.57        | down | SNORA13             |
| 8097056a      | 8.42E-03 | 1.67        | down | SNORA24             |
| 7951038a      | 5.85E-04 | 1.54        | down | SNORA40;TAF1D       |
| 8170992a      | 7.17E-04 | 1.90        | down | SNORA56             |
| 8139482a      | 1.63E-02 | 1.55        | up   | SNORA5A             |
| 8170863a      | 1.98E-03 | 1.73        | down | SNORA70;RPL10       |
| 7981974a      | 1.32E-02 | 1.61        | down | SNORD116-13         |
| 8010078a      | 3.93E-03 | 1.67        | down | SNORD1C             |
| 7948896a      | 7.19E-03 | 1.53        | down | SNORD22;SNHG1       |
| 7948910a      | 4.32E-03 | 1.76        | down | SNORD25;SNHG1       |
| 7948906a      | 6.76E-03 | 1.59        | down | SNORD27;SNHG1       |
| 7948902a      | 1.86E-03 | 1.53        | down | SNORD29;SNHG1       |
| 7948898a      | 1.49E-02 | 1.57        | down | SNORD31;SNHG1       |
| 8030366a      | 9.04E-03 | 1.59        | down | SNORD35A;RPL13A     |
| 7902400a      | 4.05E-04 | 1.61        | down | SNORD45B;RABGGTB    |
| 7902396a      | 4.52E-04 | 1.59        | down | SNORD45C            |
| 7998722a      | 3.28E-02 | 1.60        | down | SNORD60             |
| 8061075a      | 2.43E-04 | 1.89        | down | SNRNP2              |
| 8131957a      | 1.43E-03 | 3.92        | up   | SNX10               |
| 8065165a      | 1.72E-04 | 1.90        | down | SNX5                |
| 7944667a      | 2.85E-03 | 2.28        | up   | SORL1               |
| 7997909a      | 1.46E-04 | 1.66        | up   | SPG7                |
| 8028311a      | 1.41E-03 | 1.81        | down | SPINT2              |
| 8114287a      | 8.84E-03 | 3.01        | up   | SPOCK1              |
| 8176955a      | 6.40E-03 | 1.51        | down | SPRY3               |
| 8060997a      | 6.83E-04 | 8.46        | down | SPTLC3              |
| 7983512a      | 1.31E-02 | 1.76        | up   | SQRDL               |
| 7956759a      | 1.33E-02 | 1.63        | up   | SRGAP1              |
| 8003722a      | 4.03E-03 | 1.52        | up   | SRR;TSR1            |
| 8064375a      | 8.09E-04 | 2.01        | down | SRXN1               |
| 8112940a      | 1.55E-02 | 3.08        | down | SSBP2               |
| 8046726a      | 4.07E-04 | 1.55        | up   | SSFA2               |
| 7945110a      | 2.53E-04 | 1.60        | up   | ST3GAL4             |

| Transcript ID | p-value  | Fold Change | Reg  | Gene Symbol |
|---------------|----------|-------------|------|-------------|
| 8081219a      | 3.41E-05 | 2.64        | up   | ST3GAL6     |
| 7932407a      | 1.94E-03 | 1.90        | up   | ST8SIA6     |
| 8078529a      | 6.39E-05 | 3.50        | down | STAC        |
| 7929012a      | 3.39E-04 | 2.31        | down | STAMBPL1    |
| 8134036a      | 2.18E-02 | 1.68        | up   | STEAP2      |
| 8044793a      | 1.48E-03 | 1.53        | up   | STEAP3      |
| 8048505a      | 8.73E-06 | 1.55        | up   | STK16       |
| 7946365a      | 8.44E-04 | 2.57        | down | STK33       |
| 8060427a      | 2.18E-03 | 1.72        | down | STK35       |
| 7954511a      | 6.05E-03 | 1.57        | up   | STK38L      |
| 7927915a      | 2.32E-03 | 1.73        | up   | STOX1       |
| 8098549a      | 2.99E-03 | 1.67        | up   | STOX2       |
| 8165866a      | 8.45E-04 | 1.53        | down | STS         |
| 8025255a      | 7.16E-04 | 1.60        | up   | STXBP2      |
| 7978376a      | 1.60E-02 | 2.33        | down | STXBP6      |
| 8146863a      | 1.69E-03 | 5.65        | up   | SULF1       |
| 8066822a      | 5.41E-03 | 1.98        | down | SULF2       |
| 8163383a      | 4.61E-04 | 1.84        | down | SUSD1       |
| 7950810a      | 2.65E-02 | 1.51        | down | SYTL2       |
| 7944082a      | 2.31E-03 | 1.67        | down | TAGLN       |
| 8180061a      | 1.73E-03 | 1.66        | up   | TAP1        |
| 8178977a      | 3.17E-03 | 2.36        | up   | TAPBP       |
| 8180166a      | 2.44E-03 | 1.50        | up   | TAPBP       |
| 7961249a      | 2.64E-03 | 1.65        | down | TAS2R10     |
| 8065018a      | 1.90E-03 | 1.81        | down | TASP1       |
| 8064336a      | 2.01E-04 | 1.77        | down | TBC1D20     |
| 8123961a      | 8.77E-05 | 1.61        | up   | TBC1D7      |
| 7913593a      | 2.19E-02 | 2.03        | down | TCEA3       |
| 7998033a      | 3.99E-04 | 1.58        | up   | TCF25       |
| 8023415a      | 1.46E-04 | 5.74        | up   | TCF4        |
| 8043114a      | 1.13E-02 | 1.50        | up   | TCF7L1      |
| 7958692a      | 8.64E-03 | 1.53        | up   | TCTN1       |
| 8092000a      | 1.76E-03 | 2.29        | down | TERC        |
| 8135576a      | 3.36E-03 | 2.18        | down | TES         |
| 8063536a      | 1.52E-03 | 4.58        | up   | TFAP2C      |
| 8141016a      | 4.45E-04 | 5.08        | up   | TFPI2       |
| 8156826a      | 1.77E-03 | 1.82        | down | TGFBR1      |
| 8078350a      | 1.07E-02 | 1.84        | down | TGFBR2      |
| 7926708a      | 1.50E-02 | 1.52        | down | THNSL1      |
| 8043393a      | 1.17E-02 | 1.53        | down | THNSL2      |
| 8019273a      | 8.89E-05 | 1.52        | up   | THOC4       |
| 7984588a      | 8.07E-03 | 1.52        | down | THSD4       |
| 7952268a      | 1.38E-03 | 2.13        | down | THY1        |
| 8072626a      | 7.97E-04 | 5.16        | down | TIMP3       |
| 8075635a      | 3.40E-04 | 2.80        | down | TIMP3       |
| 8013771a      | 7.72E-04 | 2.01        | up   | TLCD1       |



| Transcript ID | p-value  | Fold Change | Reg  | Gene Symbol    |
|---------------|----------|-------------|------|----------------|
| 8156060a      | 3.16E-03 | 2.07        | up   | TLE4           |
| 8098611a      | 4.19E-03 | 2.10        | up   | TLR3           |
| 8091411a      | 2.25E-02 | 1.66        | down | TM4SF1         |
| 8093104a      | 2.28E-02 | 1.72        | up   | TM4SF19        |
| 7954985a      | 2.24E-05 | 2.59        | down | TMEM117        |
| 7943369a      | 1.89E-02 | 1.64        | down | TMEM133        |
| 8106170a      | 1.08E-04 | 2.45        | up   | TMEM171        |
| 8154760a      | 1.51E-03 | 1.68        | down | TMEM215        |
| 8081288a      | 6.35E-03 | 1.73        | up   | TMEM45A        |
| 8156706a      | 5.55E-04 | 2.43        | up   | TMOD1          |
| 7983734a      | 2.33E-03 | 2.99        | down | TMOD2          |
| 8169073a      | 9.99E-03 | 1.60        | down | TMSB15B;H2BFXP |
| 8064939a      | 6.53E-04 | 1.82        | down | TMX4           |
| 8163637a      | 1.71E-02 | 2.70        | down | TNC            |
| 7977046a      | 6.67E-04 | 1.66        | up   | TNFAIP2        |
| 8149749a      | 2.13E-02 | 1.57        | down | TNFRSF10D      |
| 8092095a      | 1.51E-02 | 2.54        | down | TNIK           |
| 8058869a      | 6.13E-03 | 1.54        | down | TNS1           |
| 8150962a      | 6.14E-04 | 8.08        | up   | TOX            |
| 8120880a      | 2.28E-03 | 1.54        | up   | TPBG           |
| 8151475a      | 4.30E-03 | 1.58        | up   | TPD52          |
| 7970404a      | 4.54E-02 | 1.67        | up   | TPTE2          |
| 7997852a      | 1.12E-04 | 1.60        | up   | TRAPPC2L       |
| 8012953a      | 2.17E-03 | 1.73        | up   | TRIM16         |
| 8005475a      | 7.17E-04 | 2.15        | up   | TRIM16L        |
| 8179638a      | 1.88E-04 | 1.61        | up   | TRIM26         |
| 8117321a      | 5.47E-05 | 1.99        | up   | TRIM38         |
| 7914630a      | 1.18E-03 | 1.61        | up   | TRIM62         |
| 8064879a      | 5.91E-05 | 2.03        | down | TRMT6          |
| 8077353a      | 2.53E-03 | 1.51        | down | TRNT1          |
| 8167835a      | 1.22E-03 | 1.73        | up   | TRO            |
| 7928046a      | 7.77E-03 | 1.70        | up   | TSPAN15        |
| 8110224a      | 2.08E-04 | 1.54        | up   | TSPAN17        |
| 7918857a      | 2.53E-02 | 1.52        | down | TSPAN2         |
| 8136067a      | 7.17E-04 | 1.94        | up   | TSPAN33        |
| 7925003a      | 1.60E-04 | 1.67        | down | TTC13          |
| 8136495a      | 1.52E-04 | 1.86        | up   | TTC26          |
| 8056999a      | 5.78E-04 | 1.55        | up   | TTC30A         |
| 7917199a      | 2.55E-03 | 2.27        | down | TTL7           |
| 8151042a      | 2.85E-04 | 1.66        | down | TTPA           |
| 7904726a      | 5.01E-05 | 3.09        | down | TXNIP          |
| 8154367a      | 9.70E-04 | 2.03        | up   | TYRP1          |
| 8124650a      | 4.52E-03 | 2.15        | up   | UBD;GABBR1     |
| 8078252a      | 1.74E-05 | 2.29        | down | UBE2E2         |
| 7970831a      | 3.35E-04 | 2.12        | down | UBL3           |
| 7972369a      | 1.37E-04 | 1.98        | down | UGGT2          |

| Transcript ID | p-value  | Fold Change | Reg  | Gene Symbol           |
|---------------|----------|-------------|------|-----------------------|
| 8013399a      | 1.52E-02 | 1.59        | up   | ULK2                  |
| 8071155a      | 8.55E-04 | 1.69        | up   | USP18                 |
| 8074606a      | 2.11E-03 | 1.78        | up   | USP18;USP41           |
| 7952249a      | 9.06E-03 | 1.58        | down | USP2                  |
| 8166826a      | 2.47E-04 | 1.52        | down | USP9X                 |
| 7960544a      | 2.48E-03 | 1.53        | up   | VAMP1;TAPBPL          |
| 8043203a      | 8.97E-03 | 1.56        | up   | VAMP5                 |
| 7906602a      | 1.24E-02 | 1.54        | down | VANGL2                |
| 8171013a      | 1.94E-04 | 1.58        | down | VBP1                  |
| 8106743a      | 1.42E-02 | 1.79        | down | VCAN                  |
| 7962689a      | 1.35E-02 | 1.51        | up   | VDR                   |
| 8041467a      | 2.01E-03 | 2.85        | up   | VIT                   |
| 8154100a      | 9.09E-06 | 3.22        | down | VLDLR                 |
| 8053599a      | 2.17E-04 | 1.53        | up   | WBP1;INO80B;LOC729859 |
| 8089596a      | 4.79E-03 | 1.81        | down | WDR52                 |
| 8089606a      | 6.31E-03 | 1.63        | down | WDR52                 |
| 7959330a      | 4.68E-04 | 1.82        | down | WDR66                 |
| 8148198a      | 1.46E-04 | 1.53        | up   | WDYHV1                |
| 8056860a      | 7.47E-03 | 2.01        | up   | WIPF1                 |
| 8017850a      | 1.35E-03 | 1.51        | up   | WIPI1                 |
| 8007363a      | 1.23E-03 | 1.55        | up   | WNK4                  |
| 8088180a      | 1.01E-02 | 4.27        | up   | WNT5A                 |
| 8076734a      | 4.56E-02 | 1.71        | up   | WNT7B;LOC100289775    |
| 8126952a      | 2.03E-05 | 1.75        | down | WTAP                  |
| 8109773a      | 2.56E-05 | 1.59        | down | WWC1                  |
| 8004184a      | 2.44E-03 | 2.09        | up   | XAF1                  |
| 8061324a      | 7.24E-05 | 2.22        | down | XRN2                  |
| 7971422a      | 3.30E-03 | 1.56        | down | ZC3H13                |
| 7997779a      | 2.01E-03 | 1.52        | up   | ZC3H18                |
| 8173261a      | 3.58E-04 | 3.16        | down | ZC4H2                 |
| 8003263a      | 6.72E-04 | 1.68        | up   | ZCCHC14               |
| 8173752a      | 1.44E-03 | 2.62        | down | ZCCHC5                |
| 8160151a      | 1.90E-03 | 1.61        | down | ZDHHC21               |
| 7926916a      | 2.97E-03 | 1.96        | down | ZEB1                  |
| 8147000a      | 3.68E-02 | 1.86        | down | ZFHX4                 |
| 7901426a      | 3.69E-04 | 1.51        | down | ZFYVE9                |
| 7992732a      | 3.28E-04 | 1.53        | up   | ZG16B                 |
| 7969830a      | 1.88E-04 | 1.54        | up   | ZIC2                  |
| 7967900a      | 2.55E-03 | 1.57        | down | ZMYM2                 |
| 8061154a      | 2.88E-04 | 1.64        | down | ZNF133                |
| 8093336a      | 1.01E-02 | 1.69        | down | ZNF141                |
| 8028186a      | 7.79E-04 | 1.60        | down | ZNF146                |
| 8039674a      | 5.26E-04 | 1.92        | down | ZNF154                |
| 8124502a      | 2.25E-04 | 1.56        | up   | ZNF184                |
| 8124498a      | 1.05E-03 | 2.38        | up   | ZNF204                |
| 7938183a      | 3.99E-02 | 2.33        | down | ZNF215                |

| Transcript ID | p-value  | Fold Change | Reg  | Gene Symbol      |
|---------------|----------|-------------|------|------------------|
| 7927202a      | 2.61E-02 | 1.83        | down | ZNF22;C10orf25   |
| 7933180a      | 8.37E-04 | 2.01        | down | ZNF239           |
| 8027323a      | 1.22E-03 | 5.50        | up   | ZNF257           |
| 8074845a      | 3.35E-04 | 2.53        | up   | ZNF280B          |
| 8013026a      | 1.80E-03 | 1.52        | down | ZNF287           |
| 8066745a      | 9.73E-04 | 1.74        | down | ZNF334           |
| 8064514a      | 4.70E-04 | 2.03        | down | ZNF343           |
| 8028194a      | 2.92E-02 | 1.58        | down | ZNF382           |
| 7963774a      | 6.80E-05 | 1.74        | up   | ZNF385A          |
| 8035813a      | 2.97E-02 | 2.77        | up   | ZNF43            |
| 8034393a      | 8.33E-03 | 1.66        | up   | ZNF443           |
| 8031669a      | 3.00E-03 | 1.61        | down | ZNF470           |
| 8139800a      | 5.92E-04 | 3.17        | up   | ZNF479;LOC643955 |
| 8133023a      | 2.97E-02 | 3.05        | up   | ZNF479;LOC643955 |
| 7927173a      | 1.90E-04 | 1.86        | down | ZNF485           |
| 8035773a      | 4.24E-02 | 4.18        | up   | ZNF506           |
| 7929562a      | 3.22E-05 | 1.92        | down | ZNF518A          |
| 8099364a      | 2.54E-02 | 2.23        | down | ZNF518B          |
| 8031632a      | 5.96E-03 | 3.55        | up   | ZNF542;LOC283788 |
| 8036373a      | 1.23E-04 | 1.73        | down | ZNF585A          |
| 8036389a      | 9.74E-03 | 1.60        | down | ZNF585B          |
| 8113761a      | 1.14E-02 | 1.86        | down | ZNF608           |
| 8030914a      | 1.76E-04 | 1.57        | down | ZNF610           |
| 8079198a      | 2.92E-05 | 3.42        | down | ZNF660;ZNF197    |
| 8133042a      | 6.44E-04 | 3.15        | up   | ZNF679           |
| 8033746a      | 5.91E-03 | 1.83        | up   | ZNF699           |
| 8039025a      | 6.93E-04 | 3.99        | up   | ZNF702P          |
| 8133018a      | 1.13E-05 | 8.81        | up   | ZNF716           |
| 8027348a      | 3.07E-03 | 7.07        | up   | ZNF730           |
| 7997904a      | 1.88E-04 | 2.46        | up   | ZNF778           |
| 7997896a      | 1.35E-04 | 1.72        | up   | ZNF778           |
| 8035789a      | 1.59E-02 | 1.56        | down | ZNF826           |
| 8025984a      | 1.64E-03 | 1.89        | down | ZNF844           |

Complete list of all genes meeting t-test comparison between metal-transformed clones and their control clones with p-value less than or equal to 0.05 and a fold-change cut-off of greater than or equal to 1.50

Supplementary Table 5 Differentially Expressed Genes in V-Transformed Clones

| Transcript ID | p-value  | Fold Change | Reg  | Gene Symbol                                |
|---------------|----------|-------------|------|--------------------------------------------|
| 8015741a      | 9.71E-03 | 1.59        | down | AARSD1                                     |
| 8142554a      | 2.04E-02 | 2.27        | down | AASS                                       |
| 8006690a      | 9.13E-04 | 1.79        | down | AATF                                       |
| 8018038a      | 7.19E-03 | 1.83        | down | ABCA5                                      |
| 8170704a      | 9.67E-03 | 1.68        | up   | ABCD1                                      |
| 8101675a      | 3.51E-04 | 3.20        | up   | ABCG2                                      |
| 8089145a      | 3.85E-03 | 5.22        | up   | ABI3BP                                     |
| 7936463a      | 3.94E-02 | 1.52        | up   | ABLIM1                                     |
| 8109093a      | 1.33E-03 | 2.52        | up   | ABLIM3                                     |
| 8134415a      | 1.51E-02 | 1.52        | down | ACN9                                       |
| 8083075a      | 5.09E-03 | 2.66        | up   | ACPL2                                      |
| 8008321a      | 5.41E-03 | 1.68        | up   | ACSF2                                      |
| 7934906a      | 1.01E-02 | 2.63        | up   | ACTA2                                      |
| 7987315a      | 3.89E-02 | 1.94        | down | ACTC1                                      |
| 8042788a      | 1.68E-02 | 2.36        | up   | ACTG2                                      |
| 8066431a      | 3.08E-04 | 2.07        | up   | ADA                                        |
| 7936968a      | 6.38E-03 | 4.14        | up   | ADAM12                                     |
| 8050190a      | 2.10E-03 | 1.54        | up   | ADAM17                                     |
| 8146024a      | 1.78E-02 | 1.85        | up   | ADAM32                                     |
| 8111387a      | 3.93E-02 | 1.81        | up   | ADAMTS12                                   |
| 8104321a      | 3.42E-03 | 2.35        | up   | ADAMTS16                                   |
| 8154491a      | 1.64E-02 | 2.07        | up   | ADAMTSL1                                   |
| 8154512a      | 1.17E-02 | 1.59        | up   | ADAMTSL1                                   |
| 8069178a      | 1.06E-03 | 2.49        | down | ADARB1                                     |
| 7995492a      | 7.97E-04 | 1.76        | up   | ADCY7                                      |
| 7999079a      | 1.56E-03 | 1.50        | up   | ADCY9                                      |
| 8099259a      | 1.98E-02 | 1.52        | up   | AFAP1                                      |
| 7912659a      | 1.81E-03 | 2.18        | down | AGMAT                                      |
| 8096116a      | 9.62E-03 | 2.95        | up   | AGPAT9                                     |
| 7985192a      | 1.10E-03 | 1.55        | down | AGPHD1                                     |
| 7981514a      | 6.41E-03 | 2.19        | up   | AHNAK2                                     |
| 8128795a      | 1.61E-02 | 1.58        | down | AKD1                                       |
| 7986446a      | 1.04E-02 | 2.76        | up   | ALDH1A3                                    |
| 7958784a      | 1.77E-03 | 2.99        | down | ALDH2                                      |
| 8117207a      | 5.68E-03 | 1.86        | down | ALDH5A1                                    |
| 8162827a      | 2.22E-03 | 1.65        | down | ALG2                                       |
| 7966183a      | 1.79E-03 | 1.75        | up   | ALKBH2                                     |
| 8164200a      | 7.37E-05 | 2.91        | down | ANGPTL2                                    |
| 8112596a      | 3.42E-03 | 1.90        | up   | ANKRA2                                     |
| 8161388a      | 4.26E-02 | 1.61        | down | ANKRD20A1-5;ANKRD20B;LOC375010             |
| 8053741a      | 8.01E-03 | 1.81        | down | ANKRD20B;ANKRD20A1-4                       |
| 8161415a      | 2.53E-02 | 1.54        | down | ANKRD20B;CCDC29;RP11-195B21.3;LOC100289026 |
| 8161384a      | 7.90E-03 | 2.31        | down | ANKRD20B;CCDC29;RP11-195B21.3;LOC100289454 |
| 8155591a      | 3.90E-02 | 2.14        | down | ANKRD20B;RP11-195B21.3;CCDC29              |
| 8121095a      | 1.48E-03 | 1.75        | down | ANKRD6                                     |

| Transcript ID | p-value  | Fold Change | Reg  | Gene Symbol     |
|---------------|----------|-------------|------|-----------------|
| 7957861a      | 2.70E-04 | 4.52        | down | ANO4            |
| 8101260a      | 9.13E-04 | 2.53        | up   | ANTXR2          |
| 7933237a      | 2.06E-04 | 2.93        | down | ANUBL1          |
| 7933312a      | 7.71E-03 | 3.89        | down | ANXA8L1;ANXA8L2 |
| 7927307a      | 5.86E-03 | 3.19        | down | ANXA8L2;ANXA8L1 |
| 8047300a      | 9.71E-03 | 2.21        | up   | AOX1            |
| 8112772a      | 1.11E-03 | 1.64        | up   | AP3B1           |
| 7982187a      | 2.15E-03 | 4.32        | down | APBA2           |
| 8099982a      | 2.51E-03 | 1.78        | up   | APBB2           |
| 8073088a      | 1.13E-02 | 1.81        | down | APOBEC3G        |
| 8072735a      | 4.50E-03 | 3.01        | down | APOL1           |
| 8075720a      | 5.53E-03 | 1.50        | down | APOL2           |
| 8072710a      | 4.89E-02 | 1.89        | down | APOL6           |
| 8095744a      | 2.70E-02 | 3.78        | up   | AREG            |
| 8129458a      | 1.58E-02 | 2.07        | up   | ARHGAP18        |
| 7951565a      | 6.96E-03 | 2.74        | down | ARHGAP20        |
| 8006779a      | 1.34E-02 | 1.67        | down | ARHGAP23        |
| 8019964a      | 8.92E-04 | 9.09        | down | ARHGAP28        |
| 8112033a      | 1.37E-02 | 1.82        | up   | ARL15           |
| 8016300a      | 5.88E-03 | 1.60        | down | ARL17P1;NBR2    |
| 8059854a      | 9.79E-03 | 1.64        | up   | ARL4C           |
| 7932744a      | 4.78E-03 | 1.70        | down | ARMC4           |
| 7985285a      | 2.14E-02 | 1.64        | down | ARNT2           |
| 8113073a      | 4.40E-03 | 3.05        | up   | ARRDC3          |
| 8112807a      | 6.77E-04 | 1.88        | up   | ARSB            |
| 8171148a      | 1.23E-03 | 2.04        | down | ARSD            |
| 8102440a      | 1.35E-02 | 1.83        | up   | ARSJ            |
| 8106962a      | 1.98E-03 | 2.17        | up   | ARSK            |
| 7930181a      | 9.70E-03 | 2.51        | down | AS3MT;C10orf32  |
| 7952341a      | 7.30E-04 | 6.46        | up   | ASAM            |
| 8040113a      | 3.73E-04 | 1.99        | up   | ASAP2           |
| 7940643a      | 1.13E-02 | 1.89        | down | ASRGL1          |
| 8158671a      | 5.31E-03 | 2.31        | down | ASS1            |
| 8006187a      | 1.52E-02 | 1.51        | down | ATAD5           |
| 7993167a      | 3.12E-02 | 1.66        | down | ATF7IP2         |
| 8106709a      | 1.03E-03 | 2.34        | up   | ATG10           |
| 7974270a      | 1.56E-03 | 2.72        | up   | ATL1            |
| 8094911a      | 1.00E-03 | 1.85        | up   | ATP10D          |
| 8175492a      | 1.25E-02 | 1.51        | down | ATP11C          |
| 7908940a      | 5.73E-03 | 1.82        | up   | ATP2B4          |
| 8166805a      | 3.73E-04 | 1.53        | up   | ATP6AP2         |
| 8143221a      | 6.97E-03 | 1.90        | down | ATP6V0A4        |
| 8124040a      | 1.71E-03 | 2.04        | up   | ATXN1           |
| 8015955a      | 4.57E-03 | 1.62        | down | ATXN7L3         |
| 8162264a      | 3.58E-03 | 1.58        | down | AUH             |
| 8091780a      | 5.98E-03 | 2.58        | down | B3GALNT1        |

| Transcript ID | p-value  | Fold Change | Reg  | Gene Symbol                                  |
|---------------|----------|-------------|------|----------------------------------------------|
| 8001932a      | 5.41E-03 | 1.79        | up   | B3GNT9;C16orf70                              |
| 7951910a      | 7.36E-03 | 2.30        | up   | BACE1                                        |
| 8128247a      | 1.15E-02 | 1.63        | up   | BACH2                                        |
| 8069494a      | 3.60E-04 | 2.23        | down | BAGE2;LOC441666                              |
| 7914433a      | 3.85E-03 | 1.67        | up   | BAI2                                         |
| 7926875a      | 1.65E-02 | 1.59        | up   | BAMBI                                        |
| 8001507a      | 4.53E-04 | 1.69        | up   | BBS2                                         |
| 8044375a      | 9.20E-03 | 1.55        | down | BCL2L11                                      |
| 8015715a      | 2.52E-03 | 1.71        | down | BECN1;CNTD1                                  |
| 7961891a      | 3.95E-03 | 1.87        | up   | BHLHE41                                      |
| 7943413a      | 2.11E-04 | 2.90        | down | BIRC3                                        |
| 8015769a      | 6.47E-04 | 2.08        | down | BRCA1                                        |
| 7958352a      | 1.27E-02 | 1.79        | up   | BTBD11                                       |
| 7902965a      | 2.69E-02 | 1.56        | down | BTBD8                                        |
| 7937208a      | 5.33E-03 | 1.79        | up   | C10orf125                                    |
| 7933488a      | 6.81E-03 | 1.57        | up   | C10orf72                                     |
| 7943162a      | 2.87E-02 | 1.59        | down | C11orf54                                     |
| 7951004a      | 1.43E-02 | 1.82        | down | C11orf75                                     |
| 7953936a      | 1.77E-03 | 7.37        | down | C12orf59                                     |
| 7968351a      | 6.14E-03 | 2.22        | up   | C13orf33                                     |
| 7974771a      | 2.10E-02 | 1.54        | up   | C14orf135                                    |
| 7979437a      | 6.60E-03 | 1.58        | up   | C14orf149                                    |
| 7983478a      | 2.77E-02 | 1.62        | up   | C15orf48                                     |
| 7986527a      | 3.51E-02 | 1.98        | down | C15orf51;LOC100289668;LOC441734;LOC100293999 |
| 8001178a      | 1.71E-03 | 1.95        | up   | C16orf87                                     |
| 8131475a      | 6.29E-03 | 1.60        | up   | C1GALT1                                      |
| 7924996a      | 4.80E-02 | 1.58        | down | C1orf198                                     |
| 7905154a      | 1.55E-03 | 2.14        | up   | C1orf51                                      |
| 8069574a      | 8.33E-03 | 1.68        | up   | C21orf91                                     |
| 7950336a      | 1.32E-02 | 1.79        | down | C2CD3                                        |
| 8053248a      | 1.63E-02 | 2.12        | down | C2orf65                                      |
| 8088436a      | 6.90E-04 | 1.85        | up   | C3orf67                                      |
| 8099912a      | 4.45E-02 | 1.60        | up   | C4orf34                                      |
| 8163839a      | 2.02E-02 | 1.53        | down | C5                                           |
| 8113504a      | 6.88E-03 | 2.53        | up   | C5orf13                                      |
| 8110147a      | 6.26E-04 | 4.99        | down | C5orf25                                      |
| 8108478a      | 1.26E-02 | 1.56        | down | C5orf32                                      |
| 8111584a      | 2.93E-02 | 1.52        | down | C5orf42                                      |
| 8112302a      | 5.80E-04 | 1.53        | up   | C5orf43                                      |
| 8129193a      | 2.46E-02 | 1.59        | up   | C6orf204                                     |
| 8137219a      | 7.11E-03 | 1.62        | down | C7orf29                                      |
| 8131881a      | 6.08E-03 | 2.04        | down | C7orf46                                      |
| 8135734a      | 2.37E-02 | 1.56        | up   | C7orf58                                      |
| 8132710a      | 3.20E-02 | 1.91        | up   | C7orf69                                      |
| 8146703a      | 7.41E-04 | 1.70        | down | C8orf46                                      |
| 8156601a      | 5.65E-03 | 1.57        | down | C9orf102                                     |

| Transcript ID | p-value  | Fold Change | Reg  | Gene Symbol                             |
|---------------|----------|-------------|------|-----------------------------------------|
| 8156581a      | 6.62E-03 | 1.51        | down | C9orf102                                |
| 8156604a      | 1.20E-02 | 1.51        | down | C9orf102                                |
| 8154381a      | 2.68E-04 | 5.27        | up   | C9orf150                                |
| 8164008a      | 7.46E-03 | 1.87        | down | C9orf45                                 |
| 8157144a      | 3.13E-02 | 1.58        | down | C9orf6;IKBKAP                           |
| 7989501a      | 6.11E-04 | 2.86        | up   | CA12                                    |
| 8155083a      | 2.69E-02 | 2.10        | up   | CA9                                     |
| 7971590a      | 1.17E-02 | 1.87        | down | CAB39L                                  |
| 7901993a      | 2.97E-02 | 2.26        | down | CACHD1                                  |
| 8009334a      | 2.45E-02 | 2.35        | up   | CACNG4                                  |
| 7909425a      | 1.86E-03 | 2.25        | up   | CAMK1G                                  |
| 8139330a      | 2.51E-04 | 2.14        | down | CAMK2B                                  |
| 8102415a      | 1.55E-03 | 1.94        | up   | CAMK2D                                  |
| 8137874a      | 9.77E-04 | 3.86        | down | CARD11                                  |
| 8007028a      | 8.02E-03 | 1.53        | down | CASC3                                   |
| 8172158a      | 2.19E-03 | 1.67        | up   | CASK                                    |
| 7951372a      | 3.48E-02 | 1.78        | down | CASP4                                   |
| 8107005a      | 9.54E-03 | 1.52        | up   | CAST                                    |
| 8164496a      | 1.33E-02 | 1.72        | down | CCBL1                                   |
| 8113602a      | 6.71E-03 | 1.61        | down | CCDC112                                 |
| 8013272a      | 1.07E-02 | 1.79        | down | CCDC144A;CCDC144C;CCDC144B;LOC100134159 |
| 7932082a      | 4.73E-04 | 2.86        | down | CCDC3                                   |
| 8016088a      | 1.08E-02 | 1.63        | down | CCDC43                                  |
| 8006112a      | 9.34E-04 | 1.99        | down | CCDC55                                  |
| 8015712a      | 4.73E-03 | 1.69        | down | CCDC56                                  |
| 8115261a      | 6.53E-03 | 1.59        | down | CCDC69                                  |
| 8037762a      | 2.51E-03 | 1.93        | down | CCDC8                                   |
| 7980828a      | 1.83E-04 | 6.01        | down | CCDC88C                                 |
| 7967486a      | 7.94E-03 | 1.57        | up   | CCDC92                                  |
| 8155200a      | 5.37E-03 | 1.61        | up   | CCIN                                    |
| 8006433a      | 2.97E-02 | 2.32        | down | CCL2                                    |
| 8140358a      | 4.22E-03 | 2.12        | up   | CCL26                                   |
| 7968637a      | 2.88E-03 | 2.95        | down | CCNA1                                   |
| 8095870a      | 5.59E-04 | 1.60        | up   | CCNG2                                   |
| 8120719a      | 1.29E-03 | 3.44        | up   | CD109                                   |
| 8081657a      | 1.07E-02 | 2.55        | up   | CD200                                   |
| 8177222a      | 4.39E-03 | 11.42       | up   | CD24                                    |
| 8163481a      | 5.79E-03 | 1.84        | down | CDC26                                   |
| 8142878a      | 5.35E-03 | 1.69        | down | CDC26                                   |
| 8086517a      | 1.17E-02 | 1.83        | up   | CDCP1                                   |
| 8111255a      | 1.94E-02 | 4.08        | up   | CDH10                                   |
| 7997504a      | 8.29E-03 | 1.61        | up   | CDH13                                   |
| 8111220a      | 7.05E-03 | 1.51        | up   | CDH18                                   |
| 8063796a      | 4.21E-02 | 2.02        | up   | CDH4                                    |
| 8104663a      | 4.36E-03 | 3.58        | down | CDH6                                    |
| 8006409a      | 6.20E-04 | 1.51        | down | CDK5R1                                  |

| Transcript ID | p-value  | Fold Change | Reg  | Gene Symbol                       |
|---------------|----------|-------------|------|-----------------------------------|
| 8163733a      | 7.22E-03 | 1.60        | down | CDK5RAP2                          |
| 8177462a      | 1.98E-02 | 1.58        | up   | CDK7                              |
| 7952526a      | 7.20E-03 | 2.10        | down | CDON                              |
| 8150592a      | 2.82E-03 | 1.53        | down | CEBPD                             |
| 8105842a      | 3.81E-03 | 1.77        | up   | CENPH                             |
| 8112376a      | 4.20E-03 | 1.55        | up   | CENPK                             |
| 8157534a      | 6.74E-04 | 2.02        | down | CEP110                            |
| 7996345a      | 1.43E-02 | 1.63        | up   | CES2                              |
| 8002865a      | 1.44E-02 | 1.59        | up   | CFDP1;C17orf60                    |
| 8038299a      | 4.73E-03 | 1.58        | up   | CGB7;CGB5;CGB2;LHB;CGB8;NTF4;CGB1 |
| 8146579a      | 5.25E-03 | 1.79        | down | CHD7                              |
| 7995583a      | 5.77E-03 | 1.85        | up   | CHD9                              |
| 8056890a      | 1.47E-02 | 1.54        | down | CHN1                              |
| 7950983a      | 5.60E-03 | 1.66        | down | CHORDC1                           |
| 8004416a      | 1.22E-02 | 2.36        | down | CHRN1;FGF11                       |
| 7958202a      | 8.04E-03 | 2.88        | up   | CHST11                            |
| 7936856a      | 4.93E-04 | 1.85        | up   | CHST15                            |
| 7983256a      | 2.31E-04 | 6.12        | down | CKMT1A;CKMT1B                     |
| 7902702a      | 3.42E-03 | 2.14        | up   | CLCA2                             |
| 8165334a      | 2.31E-02 | 2.41        | down | CLIC3                             |
| 7969488a      | 1.58E-02 | 1.52        | up   | CLN5                              |
| 8144279a      | 9.20E-03 | 1.50        | up   | CLN8                              |
| 7969815a      | 5.15E-03 | 1.54        | down | CLYBL                             |
| 7996290a      | 1.43E-03 | 1.52        | up   | CMTM1;CKLF                        |
| 8078397a      | 7.00E-03 | 1.60        | down | CMTM8                             |
| 8021727a      | 4.37E-03 | 1.50        | down | CNDP2                             |
| 7941587a      | 8.34E-04 | 1.86        | up   | CNIH2                             |
| 7929732a      | 1.17E-02 | 1.97        | down | CNNM1                             |
| 8007188a      | 6.37E-03 | 1.61        | down | CNP                               |
| 8007272a      | 5.60E-03 | 1.78        | down | COASY                             |
| 8002381a      | 3.87E-03 | 1.55        | up   | COG4                              |
| 8016646a      | 3.69E-02 | 2.61        | down | COL1A1                            |
| 8112687a      | 1.55E-03 | 1.72        | up   | COL4A3BP                          |
| 8169294a      | 4.73E-03 | 1.56        | up   | COL4A5                            |
| 8057620a      | 8.70E-04 | 8.27        | up   | COL5A2                            |
| 8162744a      | 1.62E-03 | 2.06        | down | CORO2A                            |
| 7984475a      | 1.89E-03 | 2.73        | up   | CORO2B                            |
| 7935647a      | 1.02E-03 | 1.63        | down | COX15                             |
| 8136200a      | 4.26E-03 | 2.10        | up   | CPA4                              |
| 8094169a      | 9.64E-04 | 2.29        | up   | CPEB2                             |
| 7995976a      | 9.77E-03 | 1.57        | up   | CPNE2                             |
| 7999553a      | 6.49E-03 | 1.92        | down | CPPED1                            |
| 7997642a      | 1.03E-03 | 4.26        | up   | CRISPLD2                          |
| 8006850a      | 1.98E-03 | 1.71        | down | CRKRS                             |
| 8014037a      | 2.17E-03 | 1.62        | down | CRLF3                             |
| 7917037a      | 4.40E-03 | 2.13        | up   | CRYZ                              |



| Transcript ID | p-value  | Fold Change | Reg  | Gene Symbol |
|---------------|----------|-------------|------|-------------|
| 7923378a      | 1.83E-04 | 1.82        | up   | CSRP1       |
| 8162652a      | 1.06E-02 | 1.78        | down | CTSL2       |
| 7929768a      | 2.07E-03 | 1.68        | down | CUTC        |
| 7936798a      | 3.27E-03 | 2.11        | up   | CUZD1       |
| 8100977a      | 2.74E-03 | 1.57        | down | CXCL5       |
| 8172110a      | 2.29E-03 | 1.53        | up   | CXorf38     |
| 8003322a      | 6.65E-03 | 1.52        | down | CYBA        |
| 7995552a      | 9.82E-04 | 1.73        | up   | CYLD        |
| 8176698a      | 2.21E-04 | 8.09        | up   | CYorf15A    |
| 8176709a      | 2.07E-03 | 3.55        | up   | CYorf15B    |
| 8051583a      | 2.37E-03 | 11.24       | up   | CYP1B1      |
| 8111772a      | 2.91E-02 | 1.80        | up   | DAB2        |
| 7974689a      | 1.20E-03 | 1.94        | up   | DACT1       |
| 8007651a      | 6.01E-04 | 1.80        | down | DBF4B       |
| 8016159a      | 1.45E-02 | 1.71        | down | DCAKD       |
| 8124196a      | 4.41E-02 | 1.94        | down | DCDC2;KAAG1 |
| 7928308a      | 4.22E-02 | 1.92        | up   | DDIT4       |
| 8176624a      | 1.26E-03 | 29.58       | up   | DDX3Y       |
| 8014574a      | 1.11E-02 | 1.52        | down | DDX52       |
| 7916898a      | 8.54E-04 | 1.54        | down | DEPDC1      |
| 7954185a      | 1.15E-02 | 1.50        | up   | DERA        |
| 8153939a      | 5.71E-03 | 1.54        | up   | DGAT1       |
| 7956046a      | 5.75E-03 | 1.96        | up   | DGKA        |
| 7950067a      | 1.95E-02 | 1.84        | down | DHCR7       |
| 8006655a      | 3.03E-02 | 1.83        | down | DHRS11      |
| 7912537a      | 8.09E-03 | 2.92        | up   | DHRS3       |
| 8007505a      | 3.38E-03 | 1.73        | down | DHX8        |
| 7980485a      | 1.35E-03 | 6.74        | down | DIO2        |
| 7931683a      | 6.37E-03 | 2.46        | down | DIP2C       |
| 8131719a      | 1.15E-02 | 2.42        | down | DNAH11      |
| 7933933a      | 3.42E-04 | 1.70        | up   | DNAJC12     |
| 8015490a      | 2.94E-04 | 2.25        | down | DNAJC7;CNP  |
| 8176076a      | 2.92E-03 | 1.68        | up   | DNASE1L1    |
| 8059580a      | 5.20E-03 | 7.09        | up   | DNER        |
| 7935660a      | 3.79E-03 | 1.82        | up   | DNMBP       |
| 8142345a      | 2.41E-02 | 2.63        | up   | DOCK4       |
| 7979963a      | 8.93E-03 | 1.81        | up   | DPF3        |
| 8165438a      | 8.47E-03 | 1.58        | down | DPP7        |
| 8138988a      | 6.00E-03 | 1.91        | down | DPY19L2P1   |
| 8145470a      | 4.72E-03 | 1.79        | up   | DPYSL2      |
| 8022711a      | 2.29E-03 | 8.37        | down | DSC2        |
| 8022692a      | 6.62E-04 | 51.06       | down | DSC3        |
| 7961371a      | 2.21E-03 | 1.61        | up   | DUSP16      |
| 8150076a      | 1.56E-03 | 2.95        | up   | DUSP4       |
| 7930413a      | 2.03E-02 | 1.65        | up   | DUSP5       |
| 8172035a      | 4.67E-03 | 1.52        | up   | DYNLT3      |

| Transcript ID | p-value  | Fold Change | Reg  | Gene Symbol |
|---------------|----------|-------------|------|-------------|
| 8042637a      | 5.63E-03 | 2.31        | up   | DYSF        |
| 8147101a      | 1.07E-02 | 2.44        | down | E2F5        |
| 8082003a      | 3.17E-03 | 1.89        | down | EAF2        |
| 7905220a      | 2.70E-04 | 2.10        | up   | ECM1        |
| 8173299a      | 6.64E-03 | 2.60        | up   | EDA2R       |
| 8112980a      | 2.00E-04 | 13.10       | up   | EDIL3       |
| 7960365a      | 1.18E-02 | 2.22        | down | EFCAB4B     |
| 7960370a      | 9.42E-03 | 1.96        | down | EFCAB4B     |
| 7905929a      | 3.64E-02 | 1.54        | down | EFNA1       |
| 8041225a      | 7.33E-04 | 1.61        | up   | EHD3        |
| 7958200a      | 2.54E-02 | 1.63        | down | EID3        |
| 8176719a      | 1.10E-03 | 34.36       | up   | EIF1AY      |
| 8088803a      | 1.69E-02 | 1.83        | down | EIF4E3      |
| 8123920a      | 1.74E-03 | 1.70        | down | ELOVL2      |
| 8112274a      | 5.27E-03 | 5.28        | down | ELOVL7      |
| 7980636a      | 7.93E-04 | 2.71        | down | EML5        |
| 7954090a      | 1.38E-03 | 2.68        | up   | EMP1        |
| 8112615a      | 4.07E-02 | 1.63        | up   | ENC1        |
| 8152522a      | 5.22E-03 | 3.69        | up   | ENPP2       |
| 8120061a      | 7.67E-04 | 3.13        | down | ENPP4       |
| 8041781a      | 6.81E-03 | 1.78        | up   | EPAS1       |
| 7899534a      | 1.48E-03 | 1.87        | down | EPB41       |
| 8041853a      | 9.09E-03 | 1.87        | down | EPCAM       |
| 8095723a      | 1.65E-02 | 4.08        | up   | EPGN        |
| 7898809a      | 2.17E-02 | 1.88        | up   | EPHB2       |
| 7902957a      | 8.89E-04 | 2.16        | down | EPHX4       |
| 8005557a      | 4.28E-03 | 1.53        | down | EPN2        |
| 7961546a      | 8.75E-03 | 1.63        | up   | EPS8        |
| 7971296a      | 3.30E-03 | 1.78        | up   | EPST1       |
| 8113250a      | 3.50E-02 | 1.76        | up   | ERAP1       |
| 8095728a      | 2.10E-02 | 2.63        | up   | EREG        |
| 7925342a      | 3.34E-03 | 2.21        | down | ERO1LB      |
| 8162833a      | 1.45E-02 | 1.55        | down | ERP44       |
| 8139840a      | 2.02E-02 | 1.62        | down | ERV3        |
| 8065032a      | 7.48E-03 | 1.74        | down | ESF1        |
| 8082974a      | 7.97E-04 | 1.71        | down | ESYT3       |
| 8037322a      | 1.18E-02 | 1.50        | up   | ETHE1       |
| 8138289a      | 4.15E-02 | 1.53        | up   | ETV1        |
| 8014066a      | 1.75E-03 | 2.59        | up   | EVI2A       |
| 7929288a      | 9.63E-04 | 1.69        | down | EXOC6       |
| 7951545a      | 9.81E-03 | 1.91        | down | EXPH5       |
| 8151310a      | 1.60E-02 | 4.73        | up   | EYA1        |
| 8122150a      | 3.84E-04 | 57.45       | up   | EYA4        |
| 8015685a      | 4.81E-03 | 1.90        | down | EZH1        |
| 8106393a      | 1.26E-02 | 1.73        | up   | F2R         |
| 8112731a      | 1.27E-03 | 5.96        | up   | F2RL2       |

| Transcript ID | p-value  | Fold Change | Reg  | Gene Symbol         |
|---------------|----------|-------------|------|---------------------|
| 7948420a      | 4.85E-02 | 3.61        | down | FABP5;FABP5L3       |
| 7903507a      | 3.64E-02 | 1.81        | down | FAM102B             |
| 8146533a      | 3.49E-03 | 2.00        | down | FAM110B             |
| 8155696a      | 3.75E-03 | 1.57        | down | FAM122A             |
| 7969192a      | 1.06E-02 | 1.72        | down | FAM124A             |
| 8157905a      | 2.93E-03 | 1.52        | down | FAM125B             |
| 8015655a      | 3.09E-03 | 1.80        | down | FAM134C             |
| 8120552a      | 4.84E-02 | 1.77        | down | FAM135A             |
| 8101728a      | 3.76E-02 | 1.54        | down | FAM13A              |
| 8113083a      | 3.08E-04 | 2.21        | up   | FAM172A             |
| 8130993a      | 9.42E-03 | 1.80        | up   | FAM20C              |
| 7936809a      | 5.80E-04 | 2.02        | up   | FAM24B;CUZD1        |
| 8127778a      | 2.70E-04 | 2.11        | up   | FAM46A              |
| 8050427a      | 3.42E-04 | 2.10        | up   | FAM49A              |
| 8004167a      | 7.53E-03 | 1.55        | down | FAM64A              |
| 7996571a      | 1.68E-02 | 1.52        | up   | FAM65A              |
| 7972936a      | 4.99E-02 | 1.52        | up   | FAM70B;LOC100291462 |
| 7982574a      | 5.39E-04 | 1.51        | down | FAM98B              |
| 8003503a      | 2.21E-04 | 1.65        | down | FANCA;ZNF276        |
| 7954631a      | 9.13E-04 | 6.95        | down | FAR2                |
| 8110920a      | 4.69E-02 | 1.53        | down | FASTKD3             |
| 7998297a      | 1.48E-03 | 1.95        | up   | FBXL16              |
| 8078461a      | 1.09E-02 | 1.86        | up   | FBXL2               |
| 8152703a      | 4.31E-02 | 2.18        | up   | FBXO32              |
| 8106141a      | 7.67E-04 | 2.02        | up   | FCHO2               |
| 8064904a      | 2.09E-02 | 2.44        | down | FERMT1              |
| 7952490a      | 1.85E-04 | 4.65        | down | FEZ1                |
| 7954729a      | 1.48E-03 | 1.94        | down | FGD4                |
| 8097829a      | 2.05E-03 | 4.44        | up   | FHDC1               |
| 8001981a      | 2.70E-04 | 2.11        | up   | FHOD1;SLC9A5        |
| 8056323a      | 2.79E-03 | 1.82        | up   | FIGN                |
| 8157074a      | 2.26E-03 | 1.74        | down | FKTN                |
| 8013622a      | 2.12E-02 | 1.52        | down | FLJ25006            |
| 8005043a      | 2.39E-02 | 2.05        | up   | FLJ34690            |
| 8019954a      | 3.21E-02 | 1.78        | down | FLJ35776            |
| 8144228a      | 6.68E-03 | 1.91        | down | FLJ36840            |
| 7952673a      | 3.80E-02 | 1.57        | down | FLJ45950            |
| 8080714a      | 1.91E-03 | 1.75        | up   | FLNB                |
| 8013788a      | 3.15E-02 | 1.51        | down | FLOT2               |
| 7970763a      | 5.27E-03 | 2.02        | down | FLT1                |
| 7975799a      | 1.52E-02 | 1.57        | up   | FLVCR2              |
| 7987145a      | 2.09E-02 | 2.29        | up   | FMN1                |
| 7910923a      | 2.01E-03 | 4.27        | down | FMN2                |
| 8170326a      | 2.68E-04 | 1.62        | up   | FMR1                |
| 8058765a      | 5.24E-04 | 2.15        | up   | FN1                 |
| 8098103a      | 7.39E-03 | 1.59        | up   | FNIP2               |

| Transcript ID | p-value  | Fold Change | Reg  | Gene Symbol                             |
|---------------|----------|-------------|------|-----------------------------------------|
| 8112592a      | 5.80E-04 | 2.61        | up   | FOXD1                                   |
| 7932132a      | 5.76E-04 | 1.92        | up   | FRMD4A                                  |
| 8131339a      | 2.14E-02 | 1.65        | up   | FSCN1                                   |
| 7995655a      | 5.73E-05 | 1.66        | up   | FTO                                     |
| 8155699a      | 6.57E-04 | 1.62        | down | FXN                                     |
| 8145611a      | 2.39E-02 | 3.11        | down | FZD3                                    |
| 8147766a      | 2.67E-02 | 1.73        | down | FZD6                                    |
| 8047487a      | 3.00E-03 | 1.90        | up   | FZD7                                    |
| 7909441a      | 1.56E-03 | 3.20        | up   | GOS2                                    |
| 7953943a      | 3.02E-02 | 1.85        | down | GABARAPL1                               |
| 8175696a      | 2.11E-03 | 8.38        | up   | GABRA3                                  |
| 8115664a      | 1.74E-02 | 1.55        | up   | GABRB2                                  |
| 7942064a      | 1.25E-05 | 5.41        | down | GAL                                     |
| 8020903a      | 3.09E-03 | 3.10        | down | GALNT1                                  |
| 8109407a      | 2.37E-02 | 1.53        | up   | GALNT10                                 |
| 8156770a      | 1.19E-02 | 1.74        | up   | GALNT12                                 |
| 8051298a      | 3.85E-03 | 2.38        | down | GALNT14                                 |
| 8045835a      | 2.24E-03 | 3.98        | up   | GALNT5                                  |
| 7963313a      | 1.75E-02 | 1.93        | down | GALNT6                                  |
| 7997414a      | 1.17E-03 | 1.53        | down | GAN                                     |
| 8157858a      | 6.37E-03 | 1.55        | down | GAPVD1                                  |
| 8157976a      | 2.11E-03 | 1.60        | down | GARNL3                                  |
| 7998103a      | 1.75E-03 | 1.58        | down | GAS8;LOC100130015                       |
| 7926105a      | 1.74E-02 | 1.82        | up   | GATA3                                   |
| 8164833a      | 1.79E-03 | 1.70        | down | GBGT1;RALGDS                            |
| 8046003a      | 1.21E-03 | 12.00       | down | GCA                                     |
| 8155930a      | 2.40E-02 | 1.58        | up   | GCNT1                                   |
| 8151816a      | 1.39E-03 | 1.93        | up   | GEM                                     |
| 8112622a      | 3.63E-03 | 1.61        | up   | GFM2                                    |
| 8002082a      | 9.33E-03 | 1.53        | up   | GFOD2                                   |
| 8091120a      | 1.17E-03 | 1.58        | down | GK5                                     |
| 8162006a      | 8.37E-04 | 2.24        | down | GKAP1                                   |
| 8160024a      | 1.55E-03 | 2.70        | down | GLDC                                    |
| 8139212a      | 4.72E-03 | 1.77        | up   | GLI3                                    |
| 8159900a      | 9.45E-06 | 4.39        | up   | GLIS3                                   |
| 8113214a      | 1.71E-02 | 1.79        | up   | GLRX                                    |
| 7965941a      | 2.18E-02 | 1.72        | up   | GLT8D2                                  |
| 8080964a      | 4.77E-05 | 2.93        | up   | GLT8D4                                  |
| 8154951a      | 7.67E-04 | 8.98        | down | GLUL                                    |
| 7922689a      | 8.81E-04 | 4.22        | down | GLUL                                    |
| 7948354a      | 6.32E-03 | 2.20        | up   | GLYATL2                                 |
| 8020164a      | 2.23E-02 | 2.11        | down | GNAL                                    |
| 7974341a      | 3.16E-02 | 1.77        | up   | GNG2                                    |
| 7925250a      | 1.13E-03 | 1.94        | up   | GNG4                                    |
| 7965812a      | 2.11E-03 | 1.59        | up   | GNPTAB                                  |
| 7981895a      | 1.69E-02 | 1.52        | down | GOLGA8C-G;LOC653061;LOC728047;LOC728498 |

| Transcript ID | p-value  | Fold Change | Reg  | Gene Symbol                            |
|---------------|----------|-------------|------|----------------------------------------|
| 8162117a      | 1.07E-03 | 1.61        | down | GOLM1;LOC100293491                     |
| 8007904a      | 3.78E-03 | 1.77        | down | GOSR2                                  |
| 8148715a      | 4.49E-03 | 1.55        | up   | GPAA1                                  |
| 8141463a      | 2.29E-02 | 1.83        | up   | GPC2;GAL3ST4                           |
| 8131844a      | 1.39E-02 | 3.03        | down | GPNMB                                  |
| 8058450a      | 1.03E-03 | 2.05        | up   | GPR1                                   |
| 8122365a      | 4.94E-03 | 1.61        | down | GPR126                                 |
| 7974372a      | 3.50E-02 | 1.76        | up   | GPR137C                                |
| 8083839a      | 2.70E-03 | 3.21        | down | GPR160                                 |
| 8157727a      | 5.48E-03 | 1.93        | down | GPR21                                  |
| 8045336a      | 5.59E-04 | 2.79        | up   | GPR39;LYPD1                            |
| 7996081a      | 1.05E-02 | 2.23        | up   | GPR56                                  |
| 8168976a      | 6.98E-03 | 1.70        | down | GPRASP2                                |
| 7995362a      | 9.15E-03 | 1.53        | up   | GPT2                                   |
| 8109333a      | 2.28E-02 | 1.60        | up   | GPX3                                   |
| 7901460a      | 5.24E-04 | 4.00        | down | GPX7                                   |
| 8007620a      | 1.40E-03 | 1.60        | down | GRN                                    |
| 8127072a      | 1.48E-03 | 3.20        | up   | GSTA1                                  |
| 8127065a      | 1.33E-03 | 1.67        | up   | GSTA2                                  |
| 7903765a      | 3.31E-02 | 3.60        | down | GSTM1                                  |
| 7930304a      | 1.98E-03 | 1.56        | up   | GSTO1                                  |
| 7968242a      | 1.02E-03 | 1.59        | up   | GTF3A                                  |
| 8158961a      | 3.50E-03 | 1.53        | down | GTF3C5                                 |
| 8046906a      | 1.47E-02 | 10.18       | down | GULP1                                  |
| 8105991a      | 2.59E-02 | 1.71        | up   | GUSBL1;LOC653188;SMA4;LOC653080;GUSBP1 |
| 8165817a      | 7.92E-03 | 3.52        | down | GYG2                                   |
| 8045009a      | 1.31E-02 | 1.60        | up   | GYPC                                   |
| 8051864a      | 3.40E-02 | 1.78        | down | hCG_1645220                            |
| 8131631a      | 2.44E-02 | 1.62        | up   | HDAC9                                  |
| 8096361a      | 6.37E-03 | 3.01        | down | HERC5                                  |
| 8106252a      | 2.06E-04 | 1.86        | up   | HEXB                                   |
| 8138776a      | 8.93E-03 | 1.51        | up   | HIBADH                                 |
| 7988124a      | 8.89E-04 | 2.28        | down | HISPPD2A                               |
| 7919627a      | 6.83E-03 | 2.45        | down | HIST2H4A;HIST2H4B                      |
| 7961483a      | 3.58E-02 | 1.68        | down | HIST4H4                                |
| 8180086a      | 3.15E-04 | 1.65        | up   | HLA-DMA;HLA-DMB                        |
| 8008588a      | 1.28E-03 | 5.76        | up   | HLF                                    |
| 7992987a      | 2.17E-03 | 1.76        | up   | HMOX2                                  |
| 7991034a      | 8.29E-03 | 2.45        | up   | HOMER2                                 |
| 8138718a      | 2.68E-03 | 1.65        | down | HOXA2                                  |
| 8016438a      | 1.00E-03 | 2.33        | up   | HOXB2                                  |
| 8016444a      | 1.33E-03 | 1.54        | up   | HOXB3                                  |
| 8016468a      | 2.01E-03 | 1.97        | up   | HOXB7                                  |
| 7955845a      | 1.53E-02 | 2.06        | up   | HOXC13                                 |
| 8040238a      | 5.76E-04 | 2.27        | up   | HPCAL1                                 |
| 8151942a      | 1.05E-03 | 1.71        | down | HRSP12                                 |

| Transcript ID | p-value  | Fold Change | Reg  | Gene Symbol        |
|---------------|----------|-------------|------|--------------------|
| 8157233a      | 3.68E-03 | 1.63        | down | HSDL2              |
| 8042283a      | 4.15E-02 | 1.59        | down | HSPC159            |
| 7913450a      | 3.30E-04 | 2.09        | up   | HSPG2;LDLRAD2      |
| 7931097a      | 1.30E-02 | 1.71        | up   | HTRA1              |
| 7915529a      | 2.43E-03 | 1.55        | up   | HYI;KIAA0467       |
| 7945040a      | 3.30E-04 | 2.93        | down | HYLS1              |
| 8025601a      | 2.26E-02 | 1.96        | down | ICAM1              |
| 8070720a      | 6.62E-04 | 2.41        | down | ICOSLG             |
| 8061564a      | 1.45E-02 | 2.17        | up   | ID1                |
| 7991374a      | 4.83E-02 | 1.70        | up   | IDH2               |
| 8175593a      | 2.55E-03 | 2.03        | up   | IDS                |
| 8170390a      | 5.48E-03 | 1.90        | up   | IDS;LOC727913      |
| 8007446a      | 1.14E-02 | 1.54        | down | IFI35              |
| 8056285a      | 2.07E-02 | 1.94        | down | IFIH1              |
| 7937335a      | 1.82E-02 | 2.11        | down | IFITM1             |
| 8160435a      | 3.12E-02 | 1.86        | up   | IFNE               |
| 8013581a      | 4.63E-02 | 1.54        | down | IFT20;TMEM97       |
| 8091737a      | 2.91E-02 | 1.56        | down | IFT80              |
| 7937772a      | 2.78E-02 | 1.53        | up   | IGF2;INS-IGF2      |
| 7955694a      | 7.66E-03 | 1.59        | up   | IGFBP6             |
| 8100541a      | 4.37E-04 | 2.10        | up   | IGFBP7;POLR2B      |
| 8058670a      | 3.37E-02 | 1.54        | up   | IKZF2              |
| 8043995a      | 1.48E-03 | 3.19        | up   | IL1R1              |
| 8105411a      | 7.93E-04 | 6.01        | up   | IL31RA             |
| 8139207a      | 2.70E-04 | 2.67        | up   | INHBA              |
| 8044927a      | 1.30E-02 | 1.74        | up   | INHBB              |
| 8102950a      | 1.09E-03 | 2.53        | up   | INPP4B             |
| 8033362a      | 6.72E-03 | 1.70        | down | INSR               |
| 8059878a      | 1.25E-05 | 3.65        | down | IQCA1;LOC100129258 |
| 8089954a      | 2.64E-02 | 1.52        | down | IQCB1              |
| 8120826a      | 2.06E-02 | 1.58        | down | IRAK1BP1           |
| 7956878a      | 9.13E-04 | 7.52        | down | IRAK3              |
| 8110872a      | 4.37E-03 | 2.49        | up   | IRX2               |
| 8035465a      | 3.78E-03 | 2.92        | down | ISYNA1             |
| 8001211a      | 5.76E-04 | 2.32        | up   | ITFG1              |
| 8001233a      | 2.70E-04 | 1.82        | up   | ITFG1              |
| 8105267a      | 2.29E-02 | 2.83        | up   | ITGA2              |
| 8046695a      | 2.65E-02 | 2.72        | down | ITGA4;CERKL        |
| 7963786a      | 2.70E-04 | 2.14        | up   | ITGA5              |
| 8046380a      | 4.82E-03 | 1.76        | up   | ITGA6              |
| 8078619a      | 2.14E-03 | 1.50        | down | ITGA9              |
| 8007931a      | 6.71E-03 | 2.29        | up   | ITGB3              |
| 8090162a      | 3.80E-03 | 1.72        | up   | ITGB5              |
| 7969861a      | 2.21E-04 | 2.74        | up   | ITGBL1             |
| 7936242a      | 5.88E-04 | 1.69        | up   | ITPRIP             |
| 8064978a      | 3.71E-03 | 2.37        | up   | JAG1               |

| Transcript ID | p-value  | Fold Change | Reg  | Gene Symbol        |
|---------------|----------|-------------|------|--------------------|
| 8116998a      | 9.45E-04 | 1.60        | up   | JARID2             |
| 8138789a      | 1.32E-03 | 1.90        | up   | JAZF1              |
| 8143341a      | 6.37E-03 | 1.55        | down | JHDM1D             |
| 8171248a      | 2.35E-03 | 1.81        | up   | KAL1               |
| 8015526a      | 6.21E-04 | 2.09        | down | KAT2A              |
| 8067033a      | 1.61E-02 | 1.60        | up   | KCNG1              |
| 7909730a      | 3.23E-02 | 2.05        | up   | KCNK2              |
| 8126153a      | 2.93E-02 | 1.53        | down | KCNK5              |
| 7934570a      | 7.63E-03 | 3.69        | up   | KCNMA1             |
| 7957126a      | 8.65E-04 | 2.02        | down | KCNMB4             |
| 8120654a      | 4.58E-06 | 8.85        | down | KCNQ5              |
| 8022646a      | 5.91E-03 | 1.63        | up   | KCTD1              |
| 7971369a      | 1.13E-04 | 2.97        | up   | KCTD4              |
| 8177232a      | 8.70E-04 | 5.11        | up   | KDM5D              |
| 8040802a      | 7.66E-03 | 1.64        | down | KHK                |
| 8163275a      | 4.15E-03 | 1.53        | down | KIAA0368           |
| 7911854a      | 3.89E-02 | 1.54        | down | KIAA0495           |
| 7902977a      | 3.61E-04 | 2.65        | down | KIAA1107           |
| 7926679a      | 1.20E-03 | 3.00        | up   | KIAA1217           |
| 8122279a      | 3.12E-03 | 3.05        | down | KIAA1244;LOC202451 |
| 8160981a      | 2.97E-03 | 1.57        | up   | KIAA1539           |
| 7910600a      | 4.41E-02 | 1.60        | down | KIAA1804           |
| 8157246a      | 4.66E-03 | 1.66        | down | KIAA1958           |
| 8124088a      | 3.49E-04 | 1.55        | up   | KIF13A             |
| 8016147a      | 5.45E-03 | 1.76        | down | KIF18B             |
| 8016139a      | 5.12E-03 | 1.65        | down | KIF18B             |
| 7929078a      | 3.78E-03 | 1.54        | down | KIF20B             |
| 8162019a      | 2.45E-03 | 1.98        | down | KIF27;LOC389765    |
| 8114030a      | 1.61E-03 | 1.73        | down | KIF3A              |
| 8045637a      | 2.48E-03 | 4.78        | down | KIF5C              |
| 8001587a      | 3.61E-03 | 1.51        | up   | KIFC3              |
| 8095110a      | 4.64E-02 | 3.38        | up   | KIT                |
| 7965322a      | 6.00E-03 | 1.96        | up   | KITLG              |
| 8040211a      | 2.55E-03 | 1.75        | up   | KLF11              |
| 7972003a      | 6.00E-03 | 1.67        | up   | KLF12              |
| 8015456a      | 1.84E-03 | 1.91        | down | KLHL11             |
| 8046186a      | 1.91E-03 | 2.05        | down | KLHL23;PHOSPHO2    |
| 8015387a      | 2.37E-02 | 2.71        | up   | KRT17              |
| 8013042a      | 4.06E-02 | 1.97        | up   | KRT17              |
| 7955613a      | 1.30E-02 | 1.57        | down | KRT7               |
| 7963353a      | 5.68E-03 | 4.97        | up   | KRT81              |
| 8175871a      | 1.79E-03 | 2.02        | up   | L1CAM              |
| 8022176a      | 8.72E-03 | 2.04        | down | LAMA1              |
| 8142194a      | 3.49E-03 | 2.14        | up   | LAMB1              |
| 7924029a      | 1.75E-03 | 2.63        | up   | LAMB3              |
| 7908041a      | 6.00E-03 | 1.65        | up   | LAMC1              |

| Transcript ID | p-value  | Fold Change | Reg  | Gene Symbol                              |
|---------------|----------|-------------|------|------------------------------------------|
| 7908072a      | 1.90E-03 | 3.75        | up   | LAMC2                                    |
| 8092348a      | 2.36E-02 | 1.92        | down | LAMP3                                    |
| 7971461a      | 6.37E-03 | 3.29        | up   | LCP1                                     |
| 8099524a      | 2.23E-03 | 1.51        | up   | LDB2                                     |
| 8175539a      | 4.61E-03 | 1.95        | up   | LDOC1                                    |
| 8145942a      | 3.26E-02 | 1.64        | up   | LETM2                                    |
| 8099685a      | 7.99E-03 | 1.87        | down | LGI2                                     |
| 7947199a      | 7.16E-04 | 3.76        | up   | LGR4                                     |
| 7971150a      | 3.08E-03 | 1.60        | up   | LHFP                                     |
| 8112803a      | 6.15E-04 | 1.98        | up   | LHFPL2                                   |
| 7908529a      | 1.98E-03 | 2.04        | down | LHX9                                     |
| 8094688a      | 1.66E-02 | 1.52        | up   | LIAS                                     |
| 8006479a      | 1.34E-03 | 1.99        | down | LIG3                                     |
| 8077490a      | 2.13E-02 | 1.63        | up   | LMCD1                                    |
| 7998381a      | 3.38E-03 | 2.05        | down | LMF1                                     |
| 8036302a      | 1.78E-03 | 1.78        | down | LOC100127980                             |
| 8012464a      | 9.15E-03 | 1.86        | up   | LOC100128288                             |
| 8135585a      | 5.80E-03 | 2.73        | up   | LOC100128868                             |
| 8015798a      | 1.26E-02 | 1.51        | down | LOC100130581                             |
| 8155503a      | 2.54E-03 | 2.04        | up   | LOC100132167;LOC100292301                |
| 8155516a      | 1.02E-02 | 1.62        | up   | LOC100132167;LOC100292301                |
| 7933572a      | 1.35E-02 | 1.63        | down | LOC100133130                             |
| 8154727a      | 1.31E-02 | 1.59        | down | LOC138412                                |
| 8034097a      | 6.36E-03 | 1.53        | down | LOC147727                                |
| 8044346a      | 1.36E-03 | 1.92        | down | LOC151009;LOC440894                      |
| 8054517a      | 1.48E-03 | 1.84        | down | LOC151009;LOC440894                      |
| 8116128a      | 7.59E-03 | 1.50        | down | LOC202181                                |
| 8056968a      | 1.83E-04 | 3.14        | up   | LOC375295                                |
| 7986428a      | 3.75E-02 | 1.52        | down | LOC400464;LOC100288426                   |
| 8160431a      | 3.08E-04 | 4.25        | up   | LOC554202                                |
| 8168412a      | 2.54E-02 | 1.61        | down | LOC554203                                |
| 8112306a      | 5.68E-03 | 1.65        | up   | LOC57399                                 |
| 8161190a      | 4.04E-02 | 1.52        | up   | LOC646993                                |
| 8077499a      | 1.52E-02 | 1.53        | up   | LOH3CR2A                                 |
| 8113709a      | 1.58E-02 | 2.15        | up   | LOX                                      |
| 7984771a      | 1.22E-03 | 1.99        | up   | LOXL1                                    |
| 8149774a      | 2.21E-04 | 2.21        | up   | LOXL2                                    |
| 8110841a      | 3.95E-02 | 1.73        | down | LPCAT1                                   |
| 7995697a      | 3.50E-03 | 2.19        | up   | LPCAT2                                   |
| 7902565a      | 1.74E-02 | 11.85       | up   | LPHN2                                    |
| 8088642a      | 1.06E-02 | 2.57        | up   | LRIG1                                    |
| 7956301a      | 1.79E-03 | 2.04        | up   | LRP1                                     |
| 8092839a      | 4.09E-02 | 1.55        | up   | LRRC15                                   |
| 8092009a      | 5.73E-05 | 2.07        | down | LRRC34                                   |
| 8016259a      | 4.15E-03 | 1.92        | down | LRRC37A2;LRRC37A3;LOC100294335;LOC644397 |
| 8007867a      | 1.63E-02 | 1.66        | down | LRRC37A2;LRRC37A3;LRRC37A4;LOC100294335  |



| Transcript ID | p-value  | Fold Change | Reg  | Gene Symbol                          |
|---------------|----------|-------------|------|--------------------------------------|
| 8016245a      | 3.42E-03 | 1.57        | down | LRRC37A4;LRRC37A3;LRRC37A2;LOC652203 |
| 8137215a      | 6.21E-03 | 1.61        | down | LRRC61                               |
| 7902861a      | 2.63E-03 | 1.83        | down | LRRC8B                               |
| 8041383a      | 5.67E-04 | 2.04        | up   | LTBP1                                |
| 7980152a      | 4.53E-02 | 1.67        | up   | LTBP2                                |
| 7949412a      | 2.08E-02 | 1.53        | up   | LTBP3                                |
| 8148553a      | 7.30E-04 | 2.24        | up   | LY6K                                 |
| 8113064a      | 1.81E-02 | 1.53        | up   | LYSMD3                               |
| 8156167a      | 2.25E-02 | 1.50        | down | MAK10                                |
| 8148040a      | 1.71E-03 | 14.73       | down | MAL2                                 |
| 8170420a      | 2.70E-04 | 3.45        | up   | MAMLD1                               |
| 7961365a      | 1.56E-02 | 1.87        | down | MANSC1                               |
| 8106098a      | 1.77E-03 | 1.59        | up   | MAP1B                                |
| 8171653a      | 3.07E-03 | 2.55        | down | MAP3K15;PDHA1                        |
| 8171725a      | 1.05E-02 | 2.70        | down | MAP7D2                               |
| 8080013a      | 1.27E-02 | 1.58        | up   | MAPKAPK3                             |
| 7909841a      | 6.21E-04 | 9.26        | down | MARK1                                |
| 8177498a      | 2.63E-03 | 2.81        | up   | MARVELD2                             |
| 8113059a      | 9.10E-03 | 1.60        | up   | MBLAC2                               |
| 8092358a      | 5.75E-03 | 1.91        | down | MCF2L2                               |
| 7917283a      | 1.86E-04 | 2.82        | down | MCOLN2                               |
| 7917304a      | 3.74E-04 | 3.41        | down | MCOLN3                               |
| 8014841a      | 5.78E-03 | 1.58        | down | MED1                                 |
| 8003922a      | 3.11E-03 | 1.53        | down | MED11                                |
| 8083360a      | 2.73E-03 | 2.79        | down | MED12L                               |
| 8014925a      | 5.21E-03 | 1.66        | down | MED24                                |
| 7976795a      | 2.43E-02 | 1.59        | up   | MEG3                                 |
| 8042356a      | 7.67E-04 | 4.20        | up   | MEIS1                                |
| 8044391a      | 9.09E-03 | 1.64        | down | MERTK                                |
| 8148917a      | 2.79E-03 | 1.73        | up   | MFSD3                                |
| 8136662a      | 1.25E-05 | 6.28        | up   | MGAM                                 |
| 8054135a      | 1.27E-05 | 6.27        | down | MGAT4A                               |
| 8175256a      | 5.98E-03 | 1.79        | down | MGC16121                             |
| 8074695a      | 4.68E-03 | 1.53        | up   | MGC16703                             |
| 8123606a      | 1.51E-02 | 2.13        | down | MGC39372                             |
| 8007799a      | 1.56E-03 | 2.05        | down | MGC57346                             |
| 8171297a      | 3.08E-04 | 2.64        | up   | MID1                                 |
| 8166797a      | 2.40E-03 | 1.65        | up   | MID1IP1                              |
| 8169249a      | 5.27E-03 | 2.26        | down | MID2                                 |
| 7973985a      | 5.21E-03 | 1.85        | down | MIPOL1                               |
| 7969576a      | 9.09E-03 | 1.79        | down | MIR17HG                              |
| 7932733a      | 1.50E-03 | 2.87        | down | MKX                                  |
| 7905329a      | 7.34E-03 | 2.01        | up   | MLLT11                               |
| 8049487a      | 5.98E-03 | 1.67        | up   | MLPH                                 |
| 8007290a      | 1.66E-03 | 1.59        | down | MLX;PSMC3IP                          |
| 7951271a      | 4.40E-03 | 6.24        | up   | MMP1                                 |

| Transcript ID | p-value  | Fold Change | Reg  | Gene Symbol   |
|---------------|----------|-------------|------|---------------|
| 7973336a      | 2.51E-03 | 1.99        | up   | MMP14         |
| 8151684a      | 2.70E-04 | 5.13        | up   | MMP16         |
| 8151686a      | 2.31E-04 | 4.78        | up   | MMP16         |
| 7995681a      | 3.72E-03 | 4.49        | up   | MMP2          |
| 8062123a      | 3.22E-02 | 1.62        | up   | MMP24         |
| 7951284a      | 1.87E-02 | 1.66        | up   | MMP3          |
| 7989146a      | 6.68E-03 | 3.01        | down | MNS1          |
| 8020955a      | 3.48E-02 | 1.64        | down | MOCOS         |
| 7909877a      | 7.26E-04 | 2.96        | down | MOSC1         |
| 8129573a      | 2.85E-02 | 2.15        | up   | MOXD1         |
| 8003068a      | 1.86E-04 | 1.96        | down | MPHOSPH6      |
| 8176174a      | 1.28E-03 | 1.75        | up   | MPP1          |
| 8058273a      | 2.31E-04 | 4.19        | up   | MPP4          |
| 7932765a      | 9.51E-03 | 3.11        | down | MPP7          |
| 7907893a      | 4.75E-03 | 1.67        | up   | MR1           |
| 8006762a      | 3.66E-03 | 1.56        | down | MRPL45        |
| 8162880a      | 3.51E-03 | 1.70        | down | MRPL50        |
| 8105181a      | 1.50E-02 | 1.73        | down | MRPS30        |
| 8157638a      | 3.34E-03 | 1.69        | down | MRRF          |
| 8106633a      | 5.96E-03 | 1.67        | up   | MSH3          |
| 7992071a      | 2.85E-04 | 2.18        | up   | MSLN          |
| 8145766a      | 5.35E-04 | 3.46        | up   | MST131        |
| 7995806a      | 2.05E-03 | 2.01        | down | MT1A          |
| 7995825a      | 1.53E-02 | 1.76        | down | MT1F          |
| 8170428a      | 1.34E-02 | 1.57        | up   | MTM1          |
| 8170443a      | 6.21E-04 | 1.68        | up   | MTMR1         |
| 7919669a      | 3.42E-04 | 1.94        | up   | MTMR11        |
| 8173245a      | 3.08E-04 | 6.37        | down | MTMR8;ASB12   |
| 8104422a      | 1.86E-02 | 1.55        | down | MTRR          |
| 7994659a      | 9.13E-04 | 1.80        | up   | MVP           |
| 7988444a      | 3.48E-02 | 2.04        | down | MYEF2;SLC24A5 |
| 8111153a      | 2.73E-02 | 1.51        | up   | MYO10         |
| 8014115a      | 2.77E-04 | 2.84        | down | MYO1D         |
| 7988876a      | 2.78E-03 | 2.78        | down | MYO5C         |
| 8005048a      | 1.56E-02 | 1.88        | up   | MYOCD         |
| 8141872a      | 1.97E-02 | 1.71        | up   | NAPEPLD       |
| 7908694a      | 2.93E-03 | 1.83        | up   | NAV1          |
| 7957298a      | 3.79E-02 | 1.96        | up   | NAV3          |
| 8007471a      | 1.56E-03 | 1.94        | down | NBR1          |
| 8007462a      | 9.57E-03 | 1.56        | down | NBR2          |
| 7943892a      | 1.06E-02 | 5.01        | down | NCAM1         |
| 8067985a      | 3.37E-02 | 2.78        | up   | NCAM2         |
| 7922773a      | 1.38E-02 | 1.92        | up   | NCF2          |
| 8055323a      | 3.67E-02 | 1.72        | up   | NCKAP5        |
| 7992402a      | 6.65E-03 | 1.52        | up   | NDUFB10       |
| 8105311a      | 4.32E-03 | 1.59        | up   | NDUFS4        |

| Transcript ID | p-value  | Fold Change | Reg  | Gene Symbol |
|---------------|----------|-------------|------|-------------|
| 7916986a      | 6.32E-03 | 3.18        | up   | NEGR1       |
| 7925954a      | 3.30E-04 | 1.72        | up   | NET1        |
| 8001197a      | 8.68E-04 | 2.32        | up   | NETO2       |
| 7909027a      | 2.12E-02 | 1.77        | up   | NFASC       |
| 7901788a      | 1.25E-05 | 6.59        | down | NFIA        |
| 8028552a      | 1.78E-03 | 1.71        | down | NFKBIB      |
| 7952677a      | 3.74E-04 | 1.52        | down | NFRKB       |
| 7925320a      | 1.26E-02 | 2.17        | down | NID1        |
| 7986675a      | 6.20E-04 | 1.91        | down | NIPA1       |
| 7898939a      | 1.71E-03 | 1.57        | up   | NIPAL3      |
| 8109563a      | 1.15E-02 | 1.98        | down | NIPAL4      |
| 8157027a      | 4.94E-02 | 1.57        | down | NIPSNAP3B   |
| 8007197a      | 6.50E-03 | 1.72        | down | NKIRAS2     |
| 8014214a      | 2.58E-03 | 1.69        | down | NLE1        |
| 8083757a      | 1.08E-03 | 1.62        | down | NMD3        |
| 7991837a      | 1.07E-02 | 1.69        | up   | NME4        |
| 8055702a      | 2.35E-02 | 1.56        | down | NMI         |
| 8007715a      | 1.24E-03 | 1.57        | down | NMT1        |
| 8162352a      | 2.76E-03 | 1.83        | down | NOL8        |
| 8148049a      | 8.87E-04 | 3.38        | down | NOV         |
| 7978391a      | 1.17E-02 | 1.85        | up   | NOVA1       |
| 8155121a      | 3.84E-03 | 1.52        | down | NPR2        |
| 8106923a      | 2.36E-03 | 1.50        | up   | NR2F1       |
| 8103094a      | 4.00E-02 | 1.66        | down | NR3C2       |
| 8145736a      | 2.29E-03 | 2.35        | up   | NRG1        |
| 8069553a      | 8.87E-04 | 2.63        | up   | NRIP1       |
| 7932985a      | 1.25E-03 | 5.04        | up   | NRP1        |
| 8047738a      | 2.75E-03 | 2.69        | up   | NRP2        |
| 8094759a      | 1.50E-04 | 1.83        | down | NSUN7       |
| 8015445a      | 4.45E-04 | 1.59        | down | NT5C3L      |
| 7953284a      | 4.58E-06 | 4.32        | up   | NTF3        |
| 7945245a      | 2.79E-02 | 1.63        | up   | NTM         |
| 7965573a      | 3.57E-04 | 6.01        | up   | NTN4        |
| 7966026a      | 3.08E-02 | 1.56        | down | NUAK1       |
| 8152340a      | 8.33E-04 | 1.59        | down | NUDCD1      |
| 8085431a      | 7.46E-04 | 4.88        | down | NUP210      |
| 7936134a      | 5.42E-04 | 1.99        | up   | OBFC1       |
| 8109752a      | 2.97E-02 | 2.04        | down | ODZ2        |
| 7995755a      | 1.03E-03 | 1.69        | up   | OGFOD1      |
| 7921882a      | 3.13E-03 | 2.58        | up   | OLFML2B     |
| 7961142a      | 2.07E-02 | 5.53        | down | OLR1        |
| 8173310a      | 1.69E-02 | 1.54        | up   | OPHN1       |
| 7925492a      | 2.65E-03 | 2.66        | up   | OPN3;KMO    |
| 7911241a      | 1.46E-02 | 1.66        | up   | OR2L8       |
| 7994981a      | 1.55E-02 | 1.50        | up   | ORAI3       |
| 7995354a      | 1.56E-03 | 1.55        | up   | ORC6L       |

| Transcript ID | p-value  | Fold Change | Reg  | Gene Symbol                            |
|---------------|----------|-------------|------|----------------------------------------|
| 8046646a      | 2.70E-03 | 2.25        | up   | OSBPL6                                 |
| 8155883a      | 4.37E-03 | 1.64        | up   | O STF1                                 |
| 7976425a      | 1.06E-02 | 1.57        | up   | OTUB2                                  |
| 8147848a      | 3.11E-02 | 1.75        | down | OXR1                                   |
| 8011415a      | 6.20E-04 | 3.31        | down | P2RX5                                  |
| 8113981a      | 1.36E-03 | 1.67        | up   | P4HA2                                  |
| 8151512a      | 1.76E-02 | 1.89        | up   | PAG1                                   |
| 8052940a      | 1.11E-02 | 1.70        | down | PAIP2B                                 |
| 7947512a      | 3.30E-03 | 4.58        | up   | PAMR1                                  |
| 8157487a      | 5.74E-03 | 3.56        | up   | PAPPA;PAPPAS                           |
| 8102214a      | 3.34E-03 | 1.70        | up   | PAPSS1                                 |
| 8120215a      | 6.37E-03 | 1.57        | up   | PAQR8                                  |
| 8047709a      | 1.51E-02 | 1.79        | down | PARD3B                                 |
| 8143327a      | 1.64E-03 | 1.71        | down | PARP12                                 |
| 8082100a      | 7.05E-03 | 1.81        | down | PARP14                                 |
| 8080144a      | 2.07E-03 | 1.69        | up   | PARP3                                  |
| 8105191a      | 3.62E-02 | 1.54        | up   | PARP8                                  |
| 8073662a      | 4.15E-03 | 1.76        | down | PARVB                                  |
| 8073682a      | 2.44E-02 | 1.90        | down | PARVG                                  |
| 7947338a      | 1.63E-03 | 6.09        | down | PAX6                                   |
| 7973974a      | 4.17E-03 | 2.62        | down | PAX9                                   |
| 7906954a      | 1.48E-02 | 2.26        | up   | PBX1                                   |
| 8087806a      | 6.37E-03 | 1.71        | up   | PCBP4                                  |
| 8097449a      | 3.64E-02 | 1.53        | up   | PCDH10                                 |
| 8108733a      | 1.50E-02 | 1.60        | down | PCDHB12                                |
| 8108753a      | 2.85E-04 | 3.51        | down | PCDHB15                                |
| 8108749a      | 2.52E-02 | 2.08        | down | PCDHB18                                |
| 8108713a      | 2.29E-02 | 2.71        | down | PCDHB8                                 |
| 8150714a      | 3.53E-02 | 1.77        | down | PCMTD1                                 |
| 8138888a      | 3.79E-03 | 4.05        | up   | PDE1C                                  |
| 8122222a      | 6.51E-03 | 2.18        | up   | PDE7B                                  |
| 8103399a      | 2.15E-03 | 1.66        | up   | PDGFC                                  |
| 8096489a      | 2.35E-02 | 1.57        | up   | PDLIM5                                 |
| 8116070a      | 2.83E-03 | 1.55        | up   | PDLIM7                                 |
| 7998820a      | 2.05E-04 | 2.09        | up   | PDPK1;FLJ42627                         |
| 7997239a      | 2.12E-02 | 1.77        | down | PDXDC2;NPIP;NPIPL2;LOC728741;LOC730153 |
| 8059996a      | 3.95E-03 | 1.52        | up   | PER2                                   |
| 7897378a      | 3.08E-04 | 2.22        | up   | PER3;UTS2                              |
| 8047467a      | 1.83E-04 | 3.35        | up   | PFTK2                                  |
| 8173551a      | 3.30E-04 | 5.33        | down | PHKA1                                  |
| 7995382a      | 6.22E-04 | 1.86        | up   | PHKB                                   |
| 7965040a      | 7.99E-03 | 2.05        | up   | PHLDA1                                 |
| 7923372a      | 6.21E-04 | 1.65        | up   | PHLDA3                                 |
| 8059565a      | 1.98E-03 | 1.91        | up   | PID1                                   |
| 8023605a      | 8.10E-03 | 1.50        | down | PIGN                                   |
| 8013641a      | 2.36E-02 | 1.59        | down | PIGS                                   |

| Transcript ID | p-value  | Fold Change | Reg  | Gene Symbol                               |
|---------------|----------|-------------|------|-------------------------------------------|
| 8105778a      | 2.15E-03 | 1.79        | up   | PIK3R1                                    |
| 7915787a      | 1.20E-03 | 2.42        | up   | PIK3R3                                    |
| 8147012a      | 4.46E-02 | 1.59        | up   | PKIA                                      |
| 7998886a      | 3.64E-03 | 1.61        | up   | PKMYT1                                    |
| 8056151a      | 9.34E-03 | 1.85        | down | PLA2R1                                    |
| 8150509a      | 3.57E-02 | 2.02        | up   | PLAT                                      |
| 7961440a      | 8.90E-04 | 5.21        | down | PLBD1                                     |
| 8060897a      | 9.63E-03 | 2.87        | down | PLCB4                                     |
| 7929388a      | 1.98E-03 | 2.27        | up   | PLCE1                                     |
| 7997453a      | 7.37E-05 | 1.68        | down | PLCG2                                     |
| 8176286a      | 1.14E-03 | 2.28        | down | PLCXD1                                    |
| 8145977a      | 9.64E-03 | 1.80        | up   | PLEKHA2                                   |
| 7996516a      | 5.49E-03 | 1.64        | up   | PLEKHG4                                   |
| 8016239a      | 2.72E-02 | 1.50        | down | PLEKHM1                                   |
| 8160297a      | 1.46E-03 | 1.54        | up   | PLIN2                                     |
| 8169061a      | 9.13E-04 | 1.53        | up   | PLP1                                      |
| 8091327a      | 3.49E-02 | 1.55        | down | PLSCR1                                    |
| 8091306a      | 3.44E-03 | 3.41        | down | PLSCR4                                    |
| 8066619a      | 2.60E-03 | 3.05        | down | PLTP                                      |
| 8067233a      | 2.53E-02 | 1.68        | up   | PMEPA1                                    |
| 8073633a      | 7.78E-04 | 2.30        | up   | PNPLA3                                    |
| 7901535a      | 1.28E-02 | 1.58        | down | PODN                                      |
| 8082368a      | 1.21E-03 | 2.00        | down | PODXL2                                    |
| 7949746a      | 9.34E-04 | 1.54        | up   | POLD4                                     |
| 8158866a      | 1.48E-03 | 1.80        | down | POMT1                                     |
| 8167287a      | 2.82E-03 | 1.92        | up   | PORCN                                     |
| 8045257a      | 2.99E-02 | 1.56        | down | POTEE;POTEF;POTEH;POTEG;POTEC;P704P;POTEK |
| 8112107a      | 6.75E-04 | 1.83        | up   | PPAP2A;SKIV2L2                            |
| 7930980a      | 2.31E-04 | 6.46        | up   | PPAPDC1A                                  |
| 7954559a      | 6.83E-03 | 1.53        | up   | PPFIBP1                                   |
| 8008768a      | 3.00E-03 | 1.87        | down | PPM1E                                     |
| 7942503a      | 2.20E-03 | 1.98        | down | PPME1                                     |
| 7934997a      | 2.70E-04 | 3.67        | up   | PPP1R3C                                   |
| 8134351a      | 5.80E-04 | 3.06        | down | PPP1R9A                                   |
| 7976451a      | 1.34E-03 | 1.93        | down | PPP4R4                                    |
| 8149250a      | 3.52E-03 | 1.67        | up   | PRAGMIN                                   |
| 7962375a      | 1.79E-04 | 5.76        | up   | PRICKLE1                                  |
| 8088550a      | 1.97E-04 | 3.14        | up   | PRICKLE2                                  |
| 7919305a      | 1.37E-03 | 1.65        | up   | PRKAB2                                    |
| 8143961a      | 3.78E-03 | 1.60        | up   | PRKAG2                                    |
| 8009301a      | 8.04E-03 | 1.78        | up   | PRKCA                                     |
| 7974835a      | 1.41E-02 | 2.06        | down | PRKCH                                     |
| 8171182a      | 2.66E-04 | 3.76        | down | PRKX                                      |
| 8176460a      | 2.70E-04 | 2.21        | up   | PRKY                                      |
| 8062108a      | 1.14E-03 | 1.68        | up   | PROCR                                     |
| 8166049a      | 6.93E-03 | 1.65        | down | PRPS2                                     |

| Transcript ID | p-value  | Fold Change | Reg  | Gene Symbol       |
|---------------|----------|-------------|------|-------------------|
| 8069582a      | 1.28E-03 | 18.90       | up   | PRSS7             |
| 7989073a      | 2.05E-04 | 2.59        | down | PRTG              |
| 8156043a      | 3.43E-02 | 1.53        | down | PSAT1             |
| 8149551a      | 1.45E-02 | 2.17        | up   | PSD3              |
| 8149555a      | 1.70E-02 | 2.08        | up   | PSD3              |
| 8006812a      | 3.64E-03 | 1.54        | down | PSMB3             |
| 8015642a      | 3.74E-03 | 1.63        | down | PSMC3IP;MLX       |
| 8006392a      | 1.75E-03 | 1.56        | down | PSMD11            |
| 8006984a      | 1.48E-03 | 1.51        | down | PSMD3             |
| 8007397a      | 3.01E-03 | 1.61        | down | PSME3             |
| 8161632a      | 2.11E-03 | 1.72        | down | PTAR1             |
| 8106107a      | 1.17E-03 | 1.87        | up   | PTCD2             |
| 7926356a      | 3.59E-03 | 3.44        | down | PTER;C1QL3        |
| 7974366a      | 1.51E-02 | 2.57        | up   | PTGER2            |
| 7902527a      | 9.11E-03 | 2.44        | up   | PTGFR             |
| 8163328a      | 2.17E-02 | 1.58        | down | PTGR1             |
| 7932420a      | 2.63E-03 | 1.62        | up   | PTPLA             |
| 8022393a      | 1.10E-03 | 1.68        | down | PTPN2             |
| 7980616a      | 4.37E-03 | 1.67        | up   | PTPN21            |
| 7918657a      | 8.63E-04 | 2.82        | up   | PTPN22            |
| 8163149a      | 6.53E-03 | 1.88        | down | PTPN3             |
| 7931353a      | 3.69E-03 | 1.73        | up   | PTPRE             |
| 8080810a      | 2.48E-03 | 1.95        | up   | PTPRG             |
| 8032926a      | 5.30E-03 | 2.43        | up   | PTPRS             |
| 8015635a      | 3.08E-03 | 1.79        | down | PTRF              |
| 8001030a      | 2.94E-04 | 2.29        | down | PYCARD            |
| 7989069a      | 2.00E-03 | 1.90        | down | PYGO1             |
| 8021301a      | 1.03E-03 | 3.25        | up   | RAB27B            |
| 7957072a      | 1.95E-03 | 1.77        | down | RAB3IP            |
| 8177478a      | 3.97E-03 | 1.63        | up   | RAD17             |
| 8020100a      | 5.70E-03 | 1.52        | down | RALBP1            |
| 8157949a      | 3.38E-03 | 1.58        | down | RALGPS1           |
| 8078286a      | 1.03E-03 | 8.77        | up   | RARB;LOC100130354 |
| 8106784a      | 7.19E-03 | 1.87        | up   | RASA1             |
| 7907611a      | 7.67E-04 | 1.63        | up   | RASAL2            |
| 7990774a      | 3.94E-02 | 5.29        | down | RASGRF1           |
| 7987405a      | 3.87E-02 | 1.73        | down | RASGRP1           |
| 8041422a      | 1.53E-02 | 2.32        | up   | RASGRP3           |
| 8064790a      | 3.03E-02 | 1.63        | down | RASSF2            |
| 7902023a      | 1.11E-03 | 6.36        | down | RAVER2            |
| 8150757a      | 1.23E-03 | 1.85        | down | RB1CC1            |
| 7956261a      | 1.57E-03 | 1.70        | up   | RBMS2             |
| 7897522a      | 1.83E-04 | 7.60        | down | RBP7              |
| 7989670a      | 1.91E-03 | 1.75        | down | RBPMS2            |
| 8014326a      | 7.72E-03 | 1.67        | down | RDM1              |
| 8106978a      | 1.13E-03 | 1.87        | up   | RFESD;SPATA9      |

| Transcript ID | p-value  | Fold Change | Reg  | Gene Symbol         |
|---------------|----------|-------------|------|---------------------|
| 8101916a      | 5.79E-03 | 1.70        | down | RG9MTD2             |
| 7908125a      | 1.29E-03 | 1.81        | up   | RGL1                |
| 8180144a      | 1.56E-03 | 1.50        | up   | RGL2                |
| 8106210a      | 1.78E-03 | 1.70        | up   | RGNEF               |
| 7906919a      | 2.47E-02 | 4.92        | up   | RGS4                |
| 8105596a      | 2.55E-03 | 1.58        | down | RGS7BP              |
| 7998136a      | 1.22E-03 | 1.56        | up   | RHBDF1              |
| 7963009a      | 7.02E-04 | 2.33        | down | RHEBL1              |
| 8006345a      | 1.20E-03 | 1.62        | down | RHOT1               |
| 8113286a      | 3.21E-02 | 1.57        | up   | RIOK2               |
| 8070489a      | 1.91E-02 | 2.34        | up   | RIPK4               |
| 8156126a      | 3.23E-02 | 1.53        | down | RMI1                |
| 8050079a      | 2.15E-03 | 1.61        | up   | RNASEH1             |
| 8083310a      | 1.79E-03 | 1.55        | down | RNF13               |
| 8105585a      | 3.06E-03 | 2.55        | down | RNF180              |
| 8116980a      | 2.04E-03 | 2.00        | up   | RNF182              |
| 8156945a      | 4.19E-02 | 1.57        | down | RNF20               |
| 7948894a      | 5.00E-02 | 2.14        | up   | RNU2-1;RNU2-2;WDR74 |
| 7901969a      | 4.05E-03 | 1.56        | up   | ROR1                |
| 8014749a      | 1.57E-02 | 1.54        | down | RPL23;SNORA21       |
| 7989493a      | 2.45E-02 | 1.50        | up   | RPS27L              |
| 8176375a      | 5.39E-04 | 78.72       | up   | RPS4Y1              |
| 8176730a      | 3.06E-03 | 1.84        | up   | RPS4Y2              |
| 8130739a      | 5.64E-03 | 1.86        | up   | RPS6KA2             |
| 8027354a      | 3.66E-03 | 3.24        | down | RPSAP58             |
| 7952549a      | 2.80E-04 | 1.58        | down | RPUSD4              |
| 8128123a      | 1.29E-03 | 4.66        | down | RRAGD               |
| 7935425a      | 2.15E-03 | 1.52        | down | RRP12               |
| 7995994a      | 1.62E-02 | 1.54        | up   | RSPRY1              |
| 8053142a      | 5.40E-04 | 1.80        | up   | RTKN                |
| 8120043a      | 3.23E-03 | 1.55        | up   | RUNX2               |
| 7920128a      | 1.42E-03 | 1.56        | up   | S100A11             |
| 7920291a      | 2.34E-04 | 1.95        | up   | S100A16             |
| 7920285a      | 2.30E-02 | 1.54        | up   | S100A2              |
| 7903393a      | 1.00E-03 | 2.22        | up   | S1PR1               |
| 7938758a      | 2.82E-02 | 1.53        | down | SAA1                |
| 8058091a      | 1.61E-03 | 2.37        | up   | SATB2               |
| 7944656a      | 3.44E-02 | 1.73        | down | SC5DL               |
| 8106479a      | 6.20E-04 | 1.94        | up   | SCAMP1              |
| 8091778a      | 2.80E-02 | 1.50        | down | SCARNA7             |
| 8101366a      | 7.10E-03 | 1.69        | up   | SCD5                |
| 8166278a      | 9.66E-03 | 1.71        | down | SCML1               |
| 8171561a      | 1.37E-02 | 1.66        | down | SCML2               |
| 8056491a      | 3.85E-02 | 1.68        | up   | SCN9A               |
| 8003060a      | 4.32E-03 | 2.61        | down | SDR42E1             |
| 8083826a      | 6.01E-04 | 1.71        | down | SEC62               |

| Transcript ID | p-value  | Fold Change | Reg  | Gene Symbol        |
|---------------|----------|-------------|------|--------------------|
| 8020254a      | 2.05E-03 | 1.54        | down | SEH1L              |
| 7919984a      | 2.68E-02 | 1.94        | down | SELENBP1           |
| 8075462a      | 5.54E-03 | 1.53        | down | SELM               |
| 8140668a      | 4.15E-03 | 9.04        | up   | SEMA3A             |
| 8079966a      | 3.05E-03 | 1.69        | up   | SEMA3B             |
| 8140534a      | 1.52E-02 | 1.59        | up   | SEMA3C             |
| 8079896a      | 2.35E-03 | 1.56        | up   | SEMA3F             |
| 8162236a      | 3.75E-03 | 3.60        | down | SEMA4D             |
| 7990345a      | 5.60E-03 | 2.19        | up   | SEMA7A             |
| 8112865a      | 1.51E-02 | 1.76        | up   | SERINC5            |
| 8021635a      | 7.55E-03 | 6.46        | up   | SERPINB2;SERPINB10 |
| 8021623a      | 4.05E-03 | 4.65        | up   | SERPINB7           |
| 8059376a      | 5.21E-03 | 2.00        | up   | SERPINE2           |
| 7909503a      | 1.13E-02 | 3.14        | down | SERTAD4            |
| 8021047a      | 4.79E-04 | 1.96        | up   | SETBP1             |
| 8150428a      | 2.22E-03 | 6.53        | up   | SFRP1              |
| 8112337a      | 8.16E-03 | 1.53        | up   | SFRS12IP1          |
| 7943288a      | 4.73E-03 | 1.54        | down | SFRS2B             |
| 7929919a      | 2.35E-04 | 1.87        | up   | SFXN3              |
| 8085556a      | 5.11E-03 | 1.57        | up   | SH3BP5             |
| 8103166a      | 7.59E-03 | 1.62        | up   | SH3D19             |
| 8108912a      | 4.37E-04 | 3.64        | up   | SH3RF2             |
| 8114991a      | 4.41E-02 | 1.59        | up   | SH3TC2             |
| 8153652a      | 1.59E-03 | 1.57        | up   | SHARPIN            |
| 8001133a      | 6.62E-04 | 1.67        | up   | SHCBP1             |
| 7920506a      | 3.30E-04 | 1.85        | down | SHE                |
| 7970676a      | 3.61E-04 | 3.31        | up   | SHISA2             |
| 8130038a      | 2.55E-03 | 1.54        | down | SHPRH              |
| 7952408a      | 6.49E-04 | 1.85        | down | SIAE               |
| 7971419a      | 1.20E-03 | 1.65        | down | SIAH3              |
| 8068496a      | 9.63E-03 | 1.77        | down | SIM2               |
| 7975459a      | 2.26E-02 | 1.78        | up   | SIPA1L1            |
| 7925062a      | 4.91E-02 | 1.79        | up   | SIPA1L2            |
| 8138689a      | 3.71E-04 | 7.47        | down | SKAP2              |
| 8083876a      | 4.17E-02 | 1.59        | down | SKIL               |
| 7969533a      | 8.24E-04 | 4.56        | down | SLAIN1             |
| 8151559a      | 1.86E-03 | 1.90        | down | SLC10A5            |
| 8002152a      | 3.78E-03 | 1.63        | up   | SLC12A4            |
| 8110755a      | 1.76E-02 | 2.16        | down | SLC12A7            |
| 8121515a      | 4.53E-04 | 1.70        | down | SLC16A10           |
| 8168424a      | 1.27E-03 | 2.72        | up   | SLC16A2            |
| 7978692a      | 1.14E-02 | 1.55        | down | SLC25A21           |
| 7971388a      | 1.66E-03 | 1.61        | up   | SLC25A30           |
| 8145291a      | 9.74E-03 | 1.80        | up   | SLC25A37           |
| 8145281a      | 8.86E-03 | 1.70        | up   | SLC25A37           |
| 8177003a      | 1.17E-02 | 1.52        | down | SLC25A6;LOC138412  |



| Transcript ID | p-value  | Fold Change | Reg  | Gene Symbol                      |
|---------------|----------|-------------|------|----------------------------------|
| 7983650a      | 4.15E-02 | 2.98        | down | SLC27A2                          |
| 7960850a      | 3.62E-02 | 1.75        | up   | SLC2A14                          |
| 7960865a      | 3.21E-02 | 2.81        | up   | SLC2A3                           |
| 8162586a      | 9.92E-03 | 1.51        | down | SLC35D2                          |
| 8068810a      | 1.34E-02 | 1.66        | down | SLC37A1                          |
| 7944931a      | 8.97E-03 | 2.54        | up   | SLC37A2                          |
| 7962559a      | 1.65E-03 | 3.35        | up   | SLC38A4                          |
| 8112121a      | 6.81E-03 | 1.51        | up   | SLC38A9                          |
| 8057677a      | 1.62E-02 | 2.12        | down | SLC40A1                          |
| 7948249a      | 5.64E-03 | 1.62        | down | SLC43A1                          |
| 8011093a      | 4.69E-03 | 1.57        | down | SLC43A2                          |
| 8005603a      | 5.35E-04 | 4.18        | down | SLC47A1                          |
| 8095585a      | 2.68E-04 | 4.18        | up   | SLC4A4                           |
| 8001082a      | 1.56E-03 | 2.21        | up   | SLC6A8;SLC6A10P                  |
| 8051762a      | 7.22E-04 | 3.55        | up   | SLC8A1                           |
| 8063923a      | 1.48E-03 | 1.90        | down | SLCO4A1;hCG_2018279              |
| 8014233a      | 1.71E-03 | 1.85        | down | SLFN11                           |
| 8014241a      | 4.05E-03 | 1.84        | down | SLFN12                           |
| 8014248a      | 2.29E-02 | 1.61        | down | SLFN13                           |
| 8115691a      | 6.88E-04 | 2.73        | up   | SLIT3                            |
| 7972239a      | 1.30E-02 | 1.59        | up   | SLITRK6                          |
| 8015039a      | 6.69E-04 | 1.73        | down | SMARCE1;KRT222                   |
| 8156982a      | 5.04E-03 | 1.57        | down | SMC2                             |
| 8155770a      | 9.98E-03 | 1.60        | down | SMC5                             |
| 8136080a      | 5.60E-03 | 1.55        | down | SMO                              |
| 7925589a      | 8.28E-03 | 1.85        | up   | SMYD3                            |
| 8150698a      | 4.24E-03 | 4.41        | up   | SNAI2                            |
| 8060963a      | 7.93E-04 | 1.87        | up   | SNAP25                           |
| 8101762a      | 4.67E-02 | 2.17        | up   | SNCA                             |
| 7982098a      | 3.30E-02 | 2.33        | up   | SNORD109A;SNORD109B              |
| 7976816a      | 4.91E-02 | 3.94        | up   | SNORD114-3                       |
| 7981949a      | 1.97E-02 | 3.45        | up   | SNORD116-1                       |
| 7981970a      | 1.34E-02 | 2.26        | up   | SNORD116-11                      |
| 7981974a      | 1.43E-02 | 2.05        | up   | SNORD116-13                      |
| 7981992a      | 1.90E-02 | 1.82        | up   | SNORD116-22                      |
| 7981994a      | 8.97E-03 | 2.47        | up   | SNORD116-23                      |
| 7981996a      | 3.00E-02 | 3.81        | up   | SNORD116-24                      |
| 7982002a      | 2.48E-02 | 1.81        | up   | SNORD116-27                      |
| 7982006a      | 1.02E-02 | 1.76        | up   | SNORD116-29                      |
| 7981960a      | 4.22E-02 | 2.37        | up   | SNORD116-6                       |
| 7981964a      | 2.37E-02 | 2.97        | up   | SNORD116-8;SNORD116-3;SNORD116-9 |
| 8145793a      | 5.99E-03 | 3.40        | up   | SNORD13                          |
| 8086752a      | 7.36E-03 | 3.42        | up   | SNORD13;RNU13P3                  |
| 7952335a      | 2.36E-03 | 1.59        | down | SNORD14E                         |
| 8159004a      | 2.63E-02 | 1.57        | down | SNORD24;RPL7A                    |
| 8159006a      | 3.07E-02 | 1.57        | down | SNORD36B                         |

| Transcript ID | p-value  | Fold Change | Reg  | Gene Symbol             |
|---------------|----------|-------------|------|-------------------------|
| 8158998a      | 6.72E-03 | 1.82        | down | SNORD36C;SNORD36A;RPL7A |
| 8005955a      | 2.55E-03 | 1.83        | down | SNORD42A                |
| 8005951a      | 7.43E-03 | 1.64        | down | SNORD42B                |
| 8005957a      | 1.34E-02 | 1.64        | down | SNORD4B                 |
| 7981919a      | 2.42E-02 | 2.47        | up   | SNRPN;SNURF             |
| 8131957a      | 6.62E-03 | 2.65        | down | SNX10                   |
| 7983393a      | 9.39E-03 | 1.77        | down | SORD                    |
| 8009517a      | 1.28E-03 | 1.73        | up   | SOX9                    |
| 7944869a      | 2.70E-04 | 2.63        | down | SPA17;SIAE              |
| 8013671a      | 3.11E-03 | 1.60        | down | SPAG5;FLJ25006          |
| 8175572a      | 1.29E-02 | 1.87        | up   | SPANXN3                 |
| 7984488a      | 7.08E-05 | 2.52        | down | SPESP1;NOX5             |
| 7914467a      | 1.77E-03 | 1.92        | up   | SPOCD1                  |
| 8114287a      | 1.19E-02 | 3.85        | up   | SPOCK1                  |
| 7972217a      | 4.18E-02 | 1.57        | up   | SPRY2                   |
| 8060997a      | 4.77E-05 | 50.35       | up   | SPTLC3                  |
| 8148280a      | 1.38E-02 | 1.61        | down | SQLE                    |
| 8073522a      | 1.88E-02 | 1.72        | down | SREBF2                  |
| 7956759a      | 1.06E-02 | 1.64        | up   | SRGAP1                  |
| 8172043a      | 2.45E-03 | 4.23        | up   | SRPX                    |
| 8168749a      | 7.26E-04 | 4.16        | up   | SRPX2                   |
| 7954481a      | 2.52E-02 | 1.58        | up   | SSPN                    |
| 7974047a      | 8.29E-03 | 1.99        | down | SSTR1                   |
| 8053484a      | 3.44E-02 | 1.57        | up   | ST3GAL5                 |
| 8006877a      | 2.88E-03 | 1.64        | down | STARD3                  |
| 8113491a      | 4.32E-02 | 1.71        | down | STARD4                  |
| 8015607a      | 1.83E-03 | 1.74        | down | STAT3                   |
| 8007212a      | 1.10E-02 | 1.72        | down | STAT5A                  |
| 8015590a      | 1.97E-03 | 1.97        | down | STAT5B                  |
| 8149825a      | 4.05E-03 | 5.20        | up   | STC1                    |
| 8115851a      | 1.20E-03 | 2.44        | up   | STC2                    |
| 8044793a      | 3.08E-03 | 1.54        | up   | STEAP3                  |
| 8132503a      | 1.03E-03 | 1.62        | up   | STK17A                  |
| 7946365a      | 2.44E-02 | 1.82        | down | STK33                   |
| 7927915a      | 1.34E-03 | 1.94        | down | STOX1                   |
| 8098549a      | 5.02E-03 | 1.61        | down | STOX2                   |
| 8164013a      | 1.79E-04 | 2.82        | down | STRBP                   |
| 8000963a      | 1.87E-03 | 1.60        | up   | STX1B                   |
| 8146863a      | 3.82E-02 | 3.21        | down | SULF1                   |
| 8163383a      | 3.50E-02 | 1.64        | down | SUSD1                   |
| 8156393a      | 1.00E-03 | 2.28        | down | SUSD3                   |
| 8086051a      | 3.44E-02 | 1.63        | up   | SUSD5                   |
| 7947147a      | 6.67E-03 | 2.46        | down | SVIP                    |
| 7917322a      | 3.08E-04 | 2.36        | down | SYDE2                   |
| 7914557a      | 2.41E-04 | 1.99        | up   | SYNC                    |
| 8010243a      | 2.35E-03 | 1.78        | down | SYNGR2                  |

| Transcript ID | p-value  | Fold Change | Reg  | Gene Symbol                             |
|---------------|----------|-------------|------|-----------------------------------------|
| 8014551a      | 1.16E-02 | 1.55        | down | SYNRG                                   |
| 7950810a      | 1.48E-04 | 3.52        | up   | SYTL2                                   |
| 8123080a      | 2.83E-03 | 1.85        | up   | SYTL3                                   |
| 8006573a      | 2.65E-03 | 1.51        | down | TAF15                                   |
| 8020702a      | 3.45E-04 | 2.49        | down | TAF4B                                   |
| 8009075a      | 1.57E-03 | 1.99        | up   | TANC2                                   |
| 7966851a      | 3.27E-02 | 1.51        | up   | TAOK3                                   |
| 8014603a      | 3.50E-03 | 1.96        | down | TBC1D3;TBC1D3B-D;TBC1D3F-H;TBC1D3P2     |
| 8014633a      | 2.46E-02 | 2.10        | down | TBC1D3D;TBC1D3C;TBC1D3H;TBC1D3F;TBC1D3B |
| 8102171a      | 5.57E-03 | 1.87        | up   | TBCK                                    |
| 8138997a      | 1.20E-03 | 2.02        | down | TBX20                                   |
| 7966690a      | 5.64E-03 | 2.20        | up   | TBX3                                    |
| 8023415a      | 1.53E-02 | 4.63        | down | TCF4                                    |
| 8156688a      | 7.05E-03 | 1.73        | down | TDRD7                                   |
| 7920057a      | 3.47E-03 | 2.21        | down | TDRKH                                   |
| 8135576a      | 1.20E-03 | 3.27        | up   | TES                                     |
| 8063536a      | 6.46E-03 | 3.01        | down | TFAP2C                                  |
| 8057599a      | 1.21E-03 | 1.79        | up   | TFPI                                    |
| 8052872a      | 2.15E-03 | 3.42        | up   | TGFA                                    |
| 7995206a      | 2.06E-03 | 1.71        | up   | TGFB1I1                                 |
| 8108217a      | 3.55E-03 | 1.61        | up   | TGFBI                                   |
| 8078350a      | 1.47E-03 | 2.54        | up   | TGFBR2                                  |
| 7917649a      | 1.57E-02 | 1.81        | up   | TGFBR3                                  |
| 8021924a      | 7.41E-04 | 1.60        | down | THOC1                                   |
| 7992795a      | 2.63E-02 | 1.56        | up   | THOC6;HCFC1R1                           |
| 8085797a      | 1.02E-02 | 1.64        | up   | THRB                                    |
| 7971813a      | 4.15E-03 | 1.64        | up   | THSD1                                   |
| 7984588a      | 3.58E-02 | 1.54        | up   | THSD4                                   |
| 8001818a      | 1.08E-02 | 1.67        | up   | TK2                                     |
| 8013771a      | 7.84E-03 | 1.88        | down | TLCD1                                   |
| 8098214a      | 2.36E-02 | 3.95        | up   | TLL1                                    |
| 7984019a      | 3.23E-03 | 1.61        | up   | TLN2                                    |
| 8099841a      | 2.44E-02 | 1.67        | up   | TLR6                                    |
| 8091411a      | 1.29E-02 | 1.67        | up   | TM4SF1                                  |
| 7954985a      | 2.24E-02 | 1.71        | up   | TMEM117                                 |
| 8120239a      | 3.57E-04 | 2.12        | up   | TMEM14A                                 |
| 8099850a      | 3.85E-02 | 2.51        | up   | TMEM156                                 |
| 8112967a      | 1.39E-03 | 1.76        | up   | TMEM167A                                |
| 8106170a      | 3.51E-02 | 1.67        | up   | TMEM171                                 |
| 7995448a      | 8.70E-04 | 1.51        | up   | TMEM188                                 |
| 8157092a      | 2.56E-03 | 2.36        | down | TMEM38B                                 |
| 8172022a      | 1.73E-04 | 60.58       | up   | TMEM47                                  |
| 8151756a      | 2.08E-02 | 1.52        | up   | TMEM55A                                 |
| 7903162a      | 1.40E-02 | 2.06        | down | TMEM56                                  |
| 7983157a      | 1.40E-03 | 1.83        | down | TMEM62                                  |
| 8152976a      | 3.98E-02 | 1.96        | down | TMEM71                                  |

| Transcript ID | p-value  | Fold Change | Reg  | Gene Symbol        |
|---------------|----------|-------------|------|--------------------|
| 8005839a      | 9.66E-03 | 1.57        | down | TMEM97             |
| 8006415a      | 8.39E-04 | 8.66        | down | TMEM98             |
| 8007108a      | 2.38E-03 | 1.93        | down | TMEM99             |
| 7983734a      | 2.87E-02 | 1.96        | up   | TMOD2              |
| 8007594a      | 4.67E-03 | 1.61        | down | TMUB2              |
| 8163637a      | 2.45E-03 | 4.19        | up   | TNC                |
| 7977046a      | 7.37E-03 | 1.79        | down | TNFAIP2            |
| 8122265a      | 7.59E-03 | 1.81        | down | TNFAIP3            |
| 8149749a      | 1.64E-02 | 1.77        | up   | TNFRSF10D          |
| 8152512a      | 1.21E-03 | 8.25        | down | TNFRSF11B          |
| 7912145a      | 3.06E-02 | 2.34        | down | TNFRSF9            |
| 8092095a      | 3.30E-02 | 1.87        | up   | TNIK               |
| 8014974a      | 1.56E-03 | 1.63        | down | TOP2A              |
| 8150962a      | 4.39E-03 | 5.19        | down | TOX                |
| 8062782a      | 1.79E-04 | 2.61        | up   | TOX2               |
| 8151475a      | 5.42E-04 | 1.98        | down | TPD52              |
| 8040365a      | 3.67E-02 | 1.55        | up   | TRIB2              |
| 8162729a      | 9.12E-04 | 1.64        | down | TRIM14             |
| 8113577a      | 2.05E-03 | 2.11        | down | TRIM36             |
| 7911218a      | 9.15E-03 | 2.22        | down | TRIM58;OR2W3       |
| 8091757a      | 3.35E-03 | 1.88        | down | TRIM59             |
| 8102678a      | 3.55E-03 | 1.54        | down | TRPC3              |
| 8164781a      | 7.55E-03 | 1.73        | down | TSC1               |
| 7971350a      | 2.04E-04 | 2.05        | up   | TSC22D1            |
| 8063444a      | 4.53E-03 | 2.33        | up   | TSHZ2;LOC100288461 |
| 8063437a      | 1.51E-02 | 2.14        | up   | TSHZ2;LOC100288461 |
| 7928046a      | 2.15E-03 | 2.17        | up   | TSPAN15            |
| 8136067a      | 5.15E-03 | 1.74        | down | TSPAN33            |
| 8101828a      | 2.15E-03 | 2.14        | up   | TSPAN5             |
| 8167790a      | 7.16E-03 | 1.57        | down | TSR2               |
| 8075857a      | 2.04E-02 | 1.69        | down | TST                |
| 8153474a      | 6.21E-03 | 1.76        | up   | TSTA3              |
| 7943919a      | 5.04E-03 | 1.75        | down | TTC12              |
| 8136495a      | 1.61E-03 | 1.85        | down | TTC26              |
| 8075142a      | 2.29E-03 | 2.26        | down | TTC28;LOC284900    |
| 8113157a      | 5.30E-03 | 1.80        | up   | TTC37              |
| 7917199a      | 3.15E-02 | 1.60        | up   | TTLL7              |
| 7938269a      | 7.93E-04 | 1.75        | up   | TUB                |
| 7963054a      | 3.97E-03 | 2.36        | up   | TUBA1A             |
| 8002660a      | 4.68E-03 | 1.65        | up   | TXNL4B             |
| 8124650a      | 4.22E-02 | 2.22        | down | UBD;GABBR1         |
| 7970831a      | 2.98E-03 | 2.02        | up   | UBL3               |
| 8146544a      | 4.37E-03 | 1.55        | down | UBXN2B             |
| 8026490a      | 2.58E-03 | 2.73        | down | UCA1               |
| 7950307a      | 2.01E-03 | 2.50        | down | UCP2               |
| 7960362a      | 8.87E-04 | 2.10        | down | UNQ3104            |

| Transcript ID | p-value  | Fold Change | Reg  | Gene Symbol |
|---------------|----------|-------------|------|-------------|
| 7992996a      | 3.08E-03 | 1.65        | up   | UNQ3118     |
| 8174717a      | 1.19E-02 | 1.59        | down | UPF3B       |
| 8132725a      | 2.44E-02 | 1.54        | up   | UPP1        |
| 8158242a      | 2.34E-02 | 1.56        | down | URM1        |
| 8071155a      | 1.56E-02 | 1.65        | down | USP18       |
| 8074606a      | 4.39E-03 | 2.34        | down | USP18;USP41 |
| 8067903a      | 5.73E-05 | 1.62        | up   | USP25       |
| 8166826a      | 1.78E-03 | 1.54        | up   | USP9X       |
| 8176578a      | 3.08E-04 | 12.17       | up   | USP9Y       |
| 8014081a      | 6.50E-03 | 1.61        | down | UTP6        |
| 8177137a      | 2.31E-04 | 16.06       | up   | UTY         |
| 8043197a      | 8.14E-03 | 2.81        | down | VAMP8       |
| 7992967a      | 1.14E-03 | 1.71        | up   | VASN        |
| 7962689a      | 8.87E-04 | 1.99        | up   | VDR         |
| 8119898a      | 3.04E-02 | 1.62        | up   | VEGFA       |
| 8154100a      | 6.29E-03 | 1.87        | up   | VLDLR       |
| 8155946a      | 1.95E-02 | 1.71        | down | VPS13A      |
| 8098379a      | 1.79E-03 | 3.87        | down | WDR17       |
| 8112746a      | 1.45E-03 | 1.79        | up   | WDR41       |
| 7991126a      | 2.21E-04 | 1.51        | down | WDR73       |
| 8007363a      | 7.97E-04 | 1.97        | down | WNK4        |
| 8088180a      | 1.88E-02 | 4.65        | up   | WNT5A       |
| 7966829a      | 1.10E-03 | 1.59        | up   | WSB2        |
| 7947363a      | 1.25E-05 | 2.97        | down | WT1         |
| 8004184a      | 1.88E-03 | 2.33        | down | XAF1        |
| 7936284a      | 1.44E-03 | 1.53        | up   | XPNPEP1     |
| 8106730a      | 3.65E-03 | 1.79        | up   | XRCC4       |
| 8091141a      | 2.83E-03 | 1.55        | down | XRN1        |
| 8168018a      | 4.12E-03 | 1.50        | down | YIPF6       |
| 8074780a      | 8.68E-03 | 1.78        | down | YPEL1       |
| 8147040a      | 4.77E-05 | 2.66        | down | ZBTB10      |
| 8089701a      | 4.71E-02 | 2.63        | down | ZBTB20      |
| 7952739a      | 3.08E-04 | 1.59        | down | ZBTB44      |
| 8167957a      | 3.52E-03 | 1.82        | down | ZC3H12B     |
| 8173261a      | 1.53E-04 | 7.00        | down | ZC4H2       |
| 8003263a      | 5.42E-04 | 1.64        | down | ZCCHC14     |
| 8160151a      | 1.21E-03 | 1.92        | down | ZDHHC21     |
| 8151561a      | 1.83E-03 | 1.88        | down | ZFAND1      |
| 8002692a      | 1.31E-03 | 1.55        | up   | ZFHX3       |
| 7996807a      | 3.80E-03 | 2.04        | up   | ZFP90       |
| 8176384a      | 1.10E-03 | 11.34       | up   | ZFY         |
| 8030002a      | 3.79E-02 | 1.53        | down | ZNF114      |
| 8139832a      | 9.32E-03 | 1.88        | down | ZNF117      |
| 8039771a      | 1.44E-03 | 1.57        | up   | ZNF132      |
| 8030954a      | 1.01E-03 | 2.19        | down | ZNF137      |
| 8133057a      | 1.22E-02 | 1.57        | down | ZNF138      |

| Transcript ID | p-value  | Fold Change | Reg  | Gene Symbol             |
|---------------|----------|-------------|------|-------------------------|
| 7946288a      | 3.14E-03 | 1.80        | down | ZNF214                  |
| 7933180a      | 1.94E-02 | 1.88        | up   | ZNF239                  |
| 8027241a      | 3.60E-04 | 5.01        | down | ZNF253;ZNF93            |
| 8027368a      | 2.73E-03 | 1.69        | down | ZNF254                  |
| 8133062a      | 2.73E-03 | 1.55        | down | ZNF273                  |
| 8074845a      | 1.79E-04 | 5.49        | up   | ZNF280B                 |
| 8013305a      | 6.90E-04 | 1.61        | down | ZNF286A;ZNF286B;TBC1D26 |
| 8115196a      | 3.75E-03 | 10.36       | up   | ZNF300                  |
| 8178275a      | 2.85E-03 | 1.69        | up   | ZNF311                  |
| 8039006a      | 2.70E-04 | 3.85        | down | ZNF320                  |
| 8039013a      | 6.04E-03 | 1.53        | down | ZNF321                  |
| 8153896a      | 1.79E-04 | 1.90        | up   | ZNF34                   |
| 8039054a      | 1.56E-04 | 4.47        | down | ZNF347                  |
| 7899870a      | 5.41E-03 | 1.73        | up   | ZNF362                  |
| 7927747a      | 2.19E-03 | 1.50        | up   | ZNF365                  |
| 7963774a      | 6.90E-04 | 1.75        | up   | ZNF385A                 |
| 8027312a      | 1.45E-02 | 1.91        | down | ZNF429                  |
| 8035813a      | 2.60E-03 | 5.14        | down | ZNF43                   |
| 8027279a      | 2.87E-02 | 1.57        | down | ZNF430                  |
| 8027292a      | 9.52E-03 | 1.85        | down | ZNF431                  |
| 8031669a      | 2.18E-03 | 1.94        | down | ZNF470                  |
| 8157193a      | 5.98E-03 | 1.82        | down | ZNF483                  |
| 8162449a      | 7.19E-03 | 1.66        | down | ZNF484                  |
| 8027260a      | 3.03E-02 | 4.70        | down | ZNF486;ZNF93            |
| 8027345a      | 6.32E-03 | 2.88        | down | ZNF492                  |
| 8027304a      | 1.02E-02 | 2.04        | down | ZNF493                  |
| 8035773a      | 4.44E-03 | 9.76        | down | ZNF506                  |
| 8162631a      | 2.45E-03 | 1.76        | down | ZNF510                  |
| 8099364a      | 1.66E-03 | 2.53        | down | ZNF518B                 |
| 8030931a      | 6.71E-03 | 2.46        | down | ZNF528                  |
| 8031632a      | 1.97E-04 | 11.51       | down | ZNF542;LOC283788        |
| 8024527a      | 1.40E-03 | 1.82        | down | ZNF556                  |
| 8148276a      | 3.72E-03 | 2.24        | down | ZNF572                  |
| 8113761a      | 1.71E-03 | 2.74        | up   | ZNF608                  |
| 8148658a      | 2.75E-03 | 1.78        | up   | ZNF623                  |
| 7962794a      | 7.49E-03 | 1.81        | down | ZNF641                  |
| 8027268a      | 7.78E-04 | 2.11        | down | ZNF66                   |
| 8039680a      | 6.90E-04 | 1.73        | down | ZNF671                  |
| 8039070a      | 1.29E-03 | 2.39        | down | ZNF677                  |
| 7910190a      | 2.07E-02 | 1.52        | down | ZNF678                  |
| 8035855a      | 5.81E-03 | 1.89        | down | ZNF681                  |
| 8033746a      | 1.80E-02 | 1.75        | down | ZNF699                  |
| 8030950a      | 1.17E-03 | 2.32        | down | ZNF701                  |
| 8039025a      | 2.26E-03 | 2.15        | down | ZNF702P                 |
| 8035803a      | 2.45E-03 | 1.90        | down | ZNF708                  |
| 8020377a      | 4.68E-03 | 1.70        | down | ZNF708;ZNF93            |

| Transcript ID | p-value  | Fold Change | Reg  | Gene Symbol                                    |
|---------------|----------|-------------|------|------------------------------------------------|
| 8027285a      | 4.25E-03 | 1.74        | down | ZNF714                                         |
| 8088911a      | 1.23E-03 | 4.59        | up   | ZNF717;LOC100287163                            |
| 8027363a      | 1.88E-02 | 2.12        | down | ZNF726                                         |
| 8027348a      | 2.13E-03 | 10.78       | up   | ZNF730                                         |
| 8035793a      | 6.75E-04 | 4.42        | down | ZNF737                                         |
| 7987361a      | 4.49E-03 | 1.60        | down | ZNF770                                         |
| 8025992a      | 1.79E-04 | 11.64       | down | ZNF788                                         |
| 8039692a      | 3.21E-02 | 1.70        | down | ZNF814;ZNF552;ZNF587;LOC100288322;LOC100293516 |
| 8103025a      | 3.64E-03 | 1.89        | up   | ZNF827                                         |
| 8025984a      | 2.74E-03 | 2.21        | down | ZNF844                                         |
| 8093332a      | 7.57E-04 | 4.39        | down | ZNF876P                                        |
| 8027254a      | 6.14E-04 | 2.49        | down | ZNF90;ZNF93                                    |
| 8027247a      | 6.35E-04 | 13.36       | down | ZNF93                                          |
| 8006627a      | 7.38E-03 | 1.62        | down | ZNHIT3;MYO19                                   |
| 8105506a      | 7.11E-03 | 1.56        | up   | ZSWIM6                                         |

Complete list of all genes meeting t-test comparison between metal-transformed clones and their control clones with p-value less than or equal to 0.05 and a fold-change cut-off of greater than or equal to 1.50

| Supplementary Table 6 Pathways in Arsenic-Transformed Clones |                                                                                                            |
|--------------------------------------------------------------|------------------------------------------------------------------------------------------------------------|
| KEGG Pathway                                                 | Genes                                                                                                      |
| hsa05322:Systemic lupus erythematosus                        | HIST1H2BK, HIST2H2BE, HIST2H2BF, H2AFY2, C1S, HIST1H3E, C2, HLA-DMB, HIST2H4A, HLA-DMA, HIST1H3H, HIST2H4B |
| hsa04623:Cytosolic DNA-sensing pathway                       | DDX58, POLR3G, POLR3F, IL6, PYCARD, NFKBIA                                                                 |
| hsa04512:ECM-receptor interaction                            | LAMA1, COL4A2, COL4A1, ITGA4, COL5A2, THBS2, SDC2                                                          |
| hsa04350:TGF-beta signaling pathway                          | BMP4, ACVR2A, TGFBR1, ID4, THBS2, TGFB2, ACVR1                                                             |
| hsa04672:Intestinal immune network for IgA production        | IL6, ITGA4, HLA-DMB, HLA-DMA, TGFB2                                                                        |
| hsa04710:Circadian rhythm                                    | NPAS2, NR1D1, CSNK1D                                                                                       |

KEGG Pathways identified by analysis with DAVID software. Lists of differentially expressed genes for Arsenic-transformed clones compared to control clones were created by conducting a t-test Volcano plot using GeneSpring software. The following criteria were used to generate the gene list: fold-change cut-off of 1.25; Benjamini-Hochberg corrected p-value of less than or equal to 0.05.



| Supplementary Table 7 Pathways in Chromium-Transformed Clones   |                                                                                                                                                                                                                                                 |
|-----------------------------------------------------------------|-------------------------------------------------------------------------------------------------------------------------------------------------------------------------------------------------------------------------------------------------|
| KEGG Pathway                                                    | Genes                                                                                                                                                                                                                                           |
| hsa00512:O-Glycan biosynthesis                                  | GALNT3, ST3GAL1, GALNT2, GALNT1, C1GALT1C1, GALNT10, GALNT7, GALNTL4, GALNT6, GALNT5, GALNT13, GALNT14                                                                                                                                          |
| hsa04350:TGF-beta signaling pathway                             | SMAD9, RBL2, E2F5, ROCK2, SMAD7, SMAD6, GDF6, TGFB2, BMP2, SMAD3, TGFB1, TGFB2, INHBB, ACVR2A, ID2, ID1, ZFYVE9, PPP2CB                                                                                                                         |
| hsa04510:Focal adhesion                                         | CAV2, MYL5, PDGFB, PDGFA, PGF, ITGA11, ITGB4, ITGB3, LAMB3, RAC2, PAK3, ITGAV, SOS2, PDGFC, LAMB1, PIK3R3, AKT3, COL4A2, COL4A1, ROCK2, ITGA4, FLNC, COL5A2, COL5A1, FLNA, CCND1, ITGA5, LAMC2, LAMC1                                           |
| hsa05410:Hypertrophic cardiomyopathy (HCM)                      | CACNA2D1, SLC8A1, PRKAG2, ITGA11, ITGB4, CACNG4, CACNB3, ITGB3, ITGA4, TPM1, TGFB1, TGFB2, ITGA5, ITGAV, PRKAA2, EMD                                                                                                                            |
| hsa04512:ECM-receptor interaction                               | COL4A2, COL4A1, HSPG2, ITGA11, ITGB4, ITGB3, ITGA4, COL5A2, COL5A1, LAMB3, ITGA5, ITGAV, LAMC2, SV2A, LAMC1, LAMB1                                                                                                                              |
| hsa05412:Arrhythmogenic right ventricular cardiomyopathy (ARVC) | CACNA2D1, SLC8A1, ITGA11, ITGB4, CACNG4, CACNB3, ITGA4, ITGB3, JUP, ITGA5, ITGAV, DSP, DSC2, EMD                                                                                                                                                |
| hsa04612:Antigen processing and presentation                    | KIR3DS1, KIR2DL5A, RFX5, KIR2DS2, KIR2DS4, CTSS, RFXANK, HLA-DQA1, CD74, HLA-F, B2M, HSPA2, HLA-DPB1, KIR2DL3, KIR2DL2, KIR3DL1                                                                                                                 |
| hsa05414:Dilated cardiomyopathy                                 | CACNA2D1, SLC8A1, ITGA11, ITGB4, CACNG4, CACNB3, ITGB3, ITGA4, TPM1, TGFB1, PRKX, TGFB2, ITGA5, ITGAV, EMD                                                                                                                                      |
| hsa05200:Pathways in cancer                                     | WNT5A, PDGFB, PDGFA, PGF, EGLN3, KITLG, MLH1, KIT, GLI3, MMP2, TGFB1, TGFB2, LAMB3, RAC2, ITGAV, SOS2, HHIP, LAMB1, PIK3R3, AKT3, COL4A2, AR, COL4A1, MSH3, IL8, TGFB2, SMAD3, RALGDS, RAD51, FZD6, JUP, SMO, CCND1, PTCH1, LAMC2, PTCH2, LAMC1 |
| hsa04010:MAPK signaling pathway                                 | IL1R1, PDGFB, PDGFA, DUSP10, CACNB3, PRKX, TGFB1, TGFB2, BDNF, MAP3K5, RASGRP3, HSPA2, RAC2, RASGRP1, SOS2, DUSP16, RRAS, RAPGEF2, AKT3, RASA1, MAP2K5, CACNA2D1, MAPKSP1, TGFB2, CACNG4, FLNC, FLNA, DUSP4, DUSP2, RPS6KA2, MAP3K14            |
| hsa05210:Colorectal cancer                                      | MSH3, TGFB2, SMAD3, MLH1, TGFB1, RALGDS, TGFB2, FZD6, CCND1, RAC2, SOS2, PIK3R3, AKT3                                                                                                                                                           |
| hsa00051:Fructose and mannose metabolism                        | MTMR1, SORD, ALDOC, HK2, TSTA3, MTMR6, PMM2                                                                                                                                                                                                     |
| hsa05212:Pancreatic cancer                                      | CCND1, RAC2, PGF, TGFB2, SMAD3, PIK3R3, RALGDS, AKT3, TGFB1, RAD51, TGFB2                                                                                                                                                                       |
| hsa05332:Graft-versus-host disease                              | KIR3DS1, KIR2DL5A, HLA-DPB1, KIR2DL3, KIR2DL2, KIR3DL1, HLA-DQA1, HLA-F                                                                                                                                                                         |
| hsa04810:Regulation of actin cytoskeleton                       | ENAH, MYL5, PDGFB, PDGFA, ROCK2, DIAPH2, DIAPH3, IQGAP3, ITGB4, ITGA11, BDKRB1, ITGB3, ITGA4, CHRM3, RAC2, TIAM2, ITGA5, PAK3, ITGAV, SOS2, CYFIP2, RRAS, PDGFC, PIK3R3                                                                         |

| Supplementary Table 7 Pathways in Chromium-Transformed Clones |                                                                                                                      |
|---------------------------------------------------------------|----------------------------------------------------------------------------------------------------------------------|
| KEGG Pathway                                                  | Genes                                                                                                                |
| hsa04360:Axon guidance                                        | ABLIM1, PLXNA3, ROCK2, L1CAM, SLIT3, EPHB2, EPHA4, RAC2, PAK3, SEMA7A, SEMA3F, SEMA3D, SEMA3C, SEMA3A, SEMA4D, RASA1 |
| hsa01040:Biosynthesis of unsaturated fatty acids              | SCD, ELOVL2, PTPLA, ACOT2, FADS2                                                                                     |
| hsa05211:Renal cell carcinoma                                 | PDGFB, PAK3, PGF, GAB1, SOS2, EGLN3, PIK3R3, AKT3, TGFB1, TGFB2                                                      |

KEGG Pathways identified by analysis with DAVID software. Lists of differentially expressed genes for Chromium-transformed clones compared to control clones were created by conducting a t-test Volcano plot using GeneSpring software. The following criteria were used to generate the gene list: fold-change cut-off of 1.50; Benjamini-Hochberg corrected p-value of less than or equal to 0.05.

| Supplementary Table 8 Pathways in Nickel-Transformed Clones |                                                                                                                                                                                                          |
|-------------------------------------------------------------|----------------------------------------------------------------------------------------------------------------------------------------------------------------------------------------------------------|
| KEGG Pathway                                                | Genes                                                                                                                                                                                                    |
| hsa05200:Pathways in cancer                                 | WNT5A, FGF5, PDGFA, PGF, ARNT2, NFKBIA, KITLG, KIT, TCF7L1, LAMB3, FGF1, FGF2, BMP4, AR, IL6, COL4A1, EPAS1, RXRB, TGFBR1, TGFBR2, CDK6, FZD3, FZD6, DAPK1, JUP, LAMA4, CBLB, WNT7B, PLCG2, LAMC2, LAMC1 |
| hsa04512:ECM-receptor interaction                           | LAMA4, LAMB3, COL4A1, TNC, ITGA7, ITGA1, ITGB4, HSPG2, LAMC2, LAMC1, COL5A2, SDC2                                                                                                                        |
| hsa00250:Alanine, aspartate and glutamate metabolism        | GLUL, ASS1, ALDH5A1, GFPT2, GAD1, DDO                                                                                                                                                                    |
| hsa00650:Butanoate metabolism                               | ALDH5A1, EHHADH, HMGCS1, GAD1, BDH1, ALDH3A2                                                                                                                                                             |
| hsa03320:PPAR signaling pathway                             | CPT1C, CYP27A1, RXRB, EHHADH, SCD, FABP3, ACSL6, ACSL5                                                                                                                                                   |

KEGG Pathways identified by analysis with DAVID software. Lists of differentially expressed genes for Nickel-transformed clones compared to control clones were created by conducting a t-test Volcano plot using GeneSpring software. The following criteria were used to generate the gene list: fold-change cut-off of 1.25; Benjamini-Hochberg corrected p-value of less than or equal to 0.05.

Supplementary Table 9 Pathways in Vanadium-Transformed Clones

| KEGG Pathway                                                    | Genes                                                                                                                                                                                                                                                    |
|-----------------------------------------------------------------|----------------------------------------------------------------------------------------------------------------------------------------------------------------------------------------------------------------------------------------------------------|
| hsa04512:ECM-receptor interaction                               | TNC, HSPG2, ITGA2, ITGB5, ITGB3, ITGA4, COL5A2, LAMA1, ITGA9, LAMB3, ITGA6, ITGA5, LAMC2, LAMC1, COL1A1, LAMB1, FN1                                                                                                                                      |
| hsa04510:Focal adhesion                                         | TLN2, TNC, ITGB5, ITGB3, PDPK1, LAMB3, PDGFC, LAMB1, PIK3R3, PIK3R1, FN1, PRKCA, PARVG, FLT1, ITGA2, ITGA4, BIRC3, FLNB, COL5A2, ITGA9, LAMA1, ITGA6, ITGA5, RASGRF1, VEGFA, LAMC2, COL1A1, LAMC1, PARVB                                                 |
| hsa05200:Pathways in cancer                                     | WNT5A, STAT5A, ARNT2, STAT5B, FGF11, KITLG, KIT, MMP2, GLI3, MMP1, LAMB3, TGFA, RARB, LAMB1, CCNA1, PIK3R3, PIK3R1, FN1, PRKCA, MSH3, EPAS1, RALBP1, TGFB2, ITGA2, FZD3, BIRC3, RALGDS, FZD7, STAT3, FZD6, SMO, LAMA1, ITGA6, VEGFA, PLCG2, LAMC2, LAMC1 |
| hsa00512:O-Glycan biosynthesis                                  | GALNT1, GALNT10, GALNT6, GALNT5, GALNT12, GCNT1, C1GALT1, GALNT14                                                                                                                                                                                        |
| hsa04360:Axon guidance                                          | ABLIM1, NRP1, EFNA1, ABLIM3, NTN4, L1CAM, DPYSL2, SLIT3, EPHB2, SEMA7A, SEMA3F, SEMA3C, SEMA3B, SEMA3A, SEMA4D, RASA1, SRGAP1                                                                                                                            |
| hsa05414:Dilated cardiomyopathy                                 | ACTC1, SLC8A1, ADCY7, ITGA2, ITGB5, CACNG4, ITGA4, ITGB3, PRKX, ITGA9, ADCY9, ITGA6, ITGA5                                                                                                                                                               |
| hsa04150:mTOR signaling pathway                                 | PDPK1, CAB39L, TSC1, RPS6KA2, INS-IGF2, VEGFA, IGF2, PIK3R3, PIK3R1, DDIT4                                                                                                                                                                               |
| hsa05222:Small cell lung cancer                                 | LAMA1, LAMB3, ITGA6, ITGA2, LAMC2, RARB, LAMC1, PIK3R3, LAMB1, BIRC3, PIK3R1, FN1                                                                                                                                                                        |
| hsa05410:Hypertrophic cardiomyopathy (HCM)                      | ITGA9, SLC8A1, ACTC1, ITGA6, ITGA5, PRKAB2, PRKAG2, CACNG4, ITGB5, ITGA2, ITGB3, ITGA4                                                                                                                                                                   |
| hsa04012:ErbB signaling pathway                                 | PRKCA, EREG, STAT5A, STAT5B, PLCG2, CAMK2D, TGFA, CAMK2B, AREG, PIK3R3, NRG1, PIK3R1                                                                                                                                                                     |
| hsa04916:Melanogenesis                                          | WNT5A, PRKCA, ADCY7, KITLG, FZD3, KIT, FZD7, PRKX, FZD6, PLCB4, ADCY9, CAMK2D, CAMK2B                                                                                                                                                                    |
| hsa04020:Calcium signaling pathway                              | PRKCA, SLC8A1, ADCY7, PHKB, SLC25A6, PHKA1, PTGFR, PRKX, P2RX5, GNAL, PLCE1, ATP2B4, PLCB4, ADCY9, PDE1C, PLCG2, CAMK2D, CAMK2B, F2R                                                                                                                     |
| hsa04960:Aldosterone-regulated sodium reabsorption              | PRKCA, PDPK1, INS-IGF2, NR3C2, IGF2, PIK3R3, INSR, PIK3R1                                                                                                                                                                                                |
| hsa00750:Vitamin B6 metabolism                                  | AOX1, PHOSPHO2, PSAT1                                                                                                                                                                                                                                    |
| hsa05412:Arrhythmogenic right ventricular cardiomyopathy (ARVC) | ITGA9, SLC8A1, ITGA6, ITGA5, CACNG4, ITGB5, ITGA2, DSC2, ITGB3, ITGA4                                                                                                                                                                                    |

KEGG Pathways identified by analysis with DAVID software. Lists of differentially expressed genes for Vanadium-transformed clones compared to control clones were created by conducting a t-test Volcano plot using GeneSpring software. The following criteria were used to generate the gene list: fold-change cut-off of 1.50; Benjamini-Hochberg corrected p-value of less than or equal to 0.05.

Supplementary Table 10 Real-Time PCR Primer Sequences

| Gene   | Primer Sequence-Forward    | Primer Sequence-Reverse        |
|--------|----------------------------|--------------------------------|
| GAPDH  | CACTCAGACCCCCACCACAC       | GATACATGACAAGGTGCGGCT          |
| LAM2C  | GTGCCTGCCACCTTCAAGTT       | TTTCCCAACATTTGCTTTGCT          |
| BMI1   | CCATCAGTTATTTGTGAGGGTGTTT  | TTAATGACTATAAGCAAGACAAAGCAATAG |
| MYC    | TTAAAAAAGCCACAGCATAACATCCT | TTTCCGCAACAAGTCCTCTTC          |
| 3EFNA5 | CAAAATCCGCTCTCCATGCT       | TCACACCCAGACGCACACA            |
| IL6    | GCATGGGCACCTCAGATTG        | TGCCCAGTGGACAGGTTTC            |
| PIM1   | GGCATTGCTGACTGTGTATATAGGA  | GGCTACCTGCTGCTCAAACA           |
| TFAP2C | AACTTGAAAAGGGTAGGCACGAA    | AAAATCTGTACTCAACGCACTGT        |
| SATB2  | TCTCCCCAAACACACCATCA       | GCAGCTCCTCGTCCTTATATTCA        |
