# Supplementary material
Source: PubMed Central journal article supplement (PMC3563094)
Supplement: NIHMS432651-supplement-ESI_2.pdf [file NIHMS432651-supplement-ESI_2.pdf]

### A Up-regulated Genes

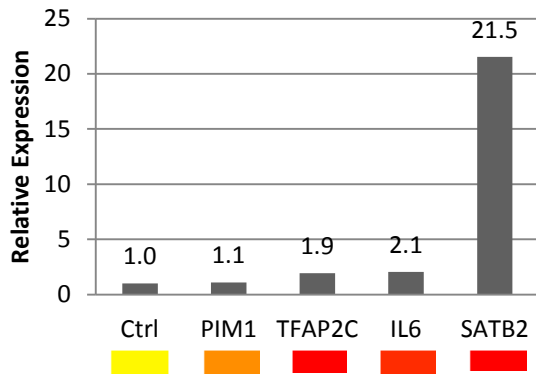

### B Down-Regulated Genes

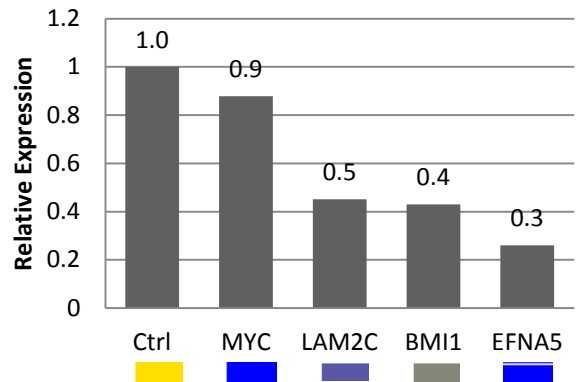

### C SATB2 expression for each Ni Clone

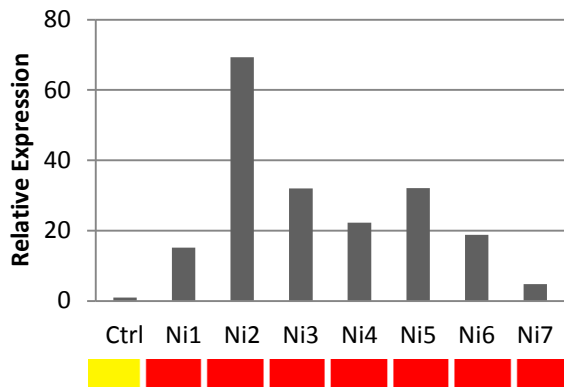

### D EFNA5 expression for each Ni Clone

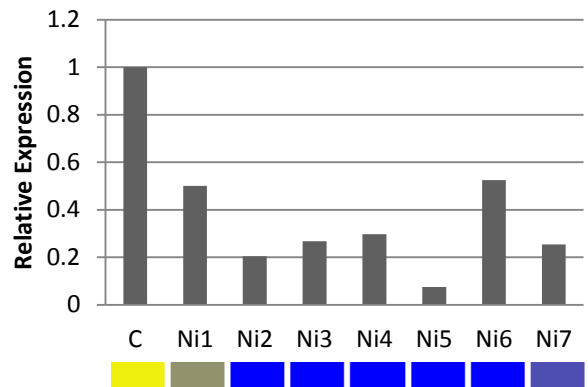

Supplementary Figure 1 Real-Time PCR Validation of Affymetrix Gene Expression Array Results . Figure 1A shows both Affymetrix fold change and qPCR fold change results for four up-regulated genes. Figure 1B shows the same for four down-regulated genes. Quantitative PCR was performed with one randomly selected nickel-transformed clone. Results for chromium clones were also analyzed by qPCR<sup>1</sup>. Figure 1C/D: qPCR fold-change for each Ni-transformed clone for one up-regulated gene (SATB2) and one down-regulated gene (EFNA5).

<sup>1</sup> H. Sun, H. A. Clancy, T. Kluz, J. Zavadil, M. Costa, Comparison of Gene Expression Profiles in Chromate Transformed BEAS-2B Cells. *PLoS One* 2011, 6.
